# Supplementary material for: Comparative proteomic analysis in human and canine breast cancer cell line: identification of proteins linked to lipid dynamics and functions
Source: Research Square preprint supplement (doi:10.21203/rs.3.rs-8132817/v1), 2025-12-04
Supplement: Supplementary file 1 [file 0d15ac0d3bf5bcca7cb93757.xlsx]

## Sheet: Supplementary Table 2A
Supplementary Table 2A. Gene annotation and binary enrichment results for selected overrepresented proteins using the Reactome database. Includes Uniprot identifier, functional annotations, term memberships and binary values (1/0) indicating presence within enriched Reactome terms. Session id: tbkg7aun7 (data: 19/06/2025)
MyList	Gene ID	Type	Tax ID	Homologene Gene ID	Homologene Gene Tax ID	R-HSA-8953854 Metabolism of RNA	R-HSA-72203 Processing of Capped Intron-Co	R-HSA-72312 rRNA processing	R-HSA-69278 Cell Cycle, Mitotic	CORUM:7292 EIF2B1-EIF2B2-EIF2B3-EIF2B4-EI	R-HSA-8856688 Golgi-to-ER retrograde transpo	R-HSA-6804756 Regulation of TP53 Activity th	R-HSA-15869 Metabolism of nucleotides	R-HSA-162906 HIV Infection	R-HSA-6790901 rRNA modification in the nucle	R-HSA-1268020 Mitochondrial protein import	R-HSA-3108214 SUMOylation of DNA damage resp	R-HSA-159236 Transport of Mature mRNA deriv	R-HSA-674695 RNA Polymerase II Pre-transcri
P62330	382	uniprot	H. sapiens	382	H. sapiens	0.0	0.0	0.0	0.0	0.0	1.0	0.0	0.0	0.0	0.0	0.0	0.0	0.0	0.0
Q9GZP4	57095	uniprot	H. sapiens	57095	H. sapiens	0.0	0.0	0.0	0.0	0.0	0.0	0.0	0.0	0.0	0.0	0.0	0.0	0.0	0.0
Q96I25	84991	uniprot	H. sapiens	84991	H. sapiens	1.0	1.0	0.0	0.0	0.0	0.0	0.0	0.0	0.0	0.0	0.0	0.0	0.0	0.0
A6NDG6	283871	uniprot	H. sapiens	283871	H. sapiens	0.0	0.0	0.0	0.0	0.0	0.0	0.0	0.0	0.0	0.0	0.0	0.0	0.0	0.0
Q6P4I2	84942	uniprot	H. sapiens	84942	H. sapiens	0.0	0.0	0.0	0.0	0.0	0.0	0.0	0.0	0.0	0.0	0.0	0.0	0.0	0.0
Q8TED0	84135	uniprot	H. sapiens	84135	H. sapiens	1.0	0.0	1.0	0.0	0.0	0.0	0.0	0.0	0.0	1.0	0.0	0.0	0.0	0.0
Q9NVE7	55229	uniprot	H. sapiens	55229	H. sapiens	0.0	0.0	0.0	0.0	0.0	0.0	0.0	0.0	0.0	0.0	0.0	0.0	0.0	0.0
Q13131	5562	uniprot	H. sapiens	5562	H. sapiens	0.0	0.0	0.0	0.0	0.0	0.0	1.0	0.0	0.0	0.0	0.0	0.0	0.0	0.0
Q6PD62	9646	uniprot	H. sapiens	9646	H. sapiens	0.0	0.0	0.0	0.0	0.0	0.0	0.0	0.0	0.0	0.0	0.0	0.0	0.0	1.0
Q01664	7023	uniprot	H. sapiens	7023	H. sapiens	0.0	0.0	0.0	0.0	0.0	0.0	0.0	0.0	0.0	0.0	0.0	0.0	0.0	0.0
Q9HC36	55178	uniprot	H. sapiens	55178	H. sapiens	1.0	0.0	1.0	0.0	0.0	0.0	0.0	0.0	0.0	0.0	0.0	0.0	0.0	0.0
O15400	8417	uniprot	H. sapiens	8417	H. sapiens	0.0	0.0	0.0	0.0	0.0	0.0	0.0	0.0	0.0	0.0	0.0	0.0	0.0	0.0
O60216	5885	uniprot	H. sapiens	5885	H. sapiens	0.0	0.0	0.0	1.0	0.0	0.0	1.0	0.0	0.0	0.0	0.0	1.0	0.0	0.0
Q2TAA2	285148	uniprot	H. sapiens	285148	H. sapiens	0.0	0.0	0.0	0.0	0.0	0.0	0.0	0.0	0.0	0.0	0.0	0.0	0.0	0.0
Q99747	8774	uniprot	H. sapiens	8774	H. sapiens	0.0	0.0	0.0	0.0	0.0	1.0	0.0	0.0	0.0	0.0	0.0	0.0	0.0	0.0
Q9NQT5	51010	uniprot	H. sapiens	51010	H. sapiens	1.0	0.0	1.0	0.0	0.0	0.0	0.0	0.0	0.0	0.0	0.0	0.0	0.0	0.0
O95433	10598	uniprot	H. sapiens	10598	H. sapiens	0.0	0.0	0.0	0.0	0.0	0.0	0.0	0.0	0.0	0.0	0.0	0.0	0.0	0.0
O75312	8882	uniprot	H. sapiens	8882	H. sapiens	0.0	0.0	0.0	0.0	0.0	0.0	0.0	0.0	0.0	0.0	0.0	0.0	0.0	0.0
P11387	7150	uniprot	H. sapiens	7150	H. sapiens	0.0	0.0	0.0	0.0	0.0	0.0	0.0	0.0	0.0	0.0	0.0	1.0	0.0	0.0
Q12769	23279	uniprot	H. sapiens	23279	H. sapiens	1.0	1.0	1.0	1.0	0.0	0.0	0.0	0.0	1.0	0.0	0.0	1.0	1.0	0.0
P00491	4860	uniprot	H. sapiens	4860	H. sapiens	0.0	0.0	0.0	0.0	0.0	0.0	0.0	1.0	0.0	0.0	0.0	0.0	0.0	0.0
Q9NRL2	11177	uniprot	H. sapiens	11177	H. sapiens	0.0	0.0	0.0	0.0	0.0	0.0	0.0	0.0	0.0	0.0	0.0	0.0	0.0	0.0
O43660	5356	uniprot	H. sapiens	5356	H. sapiens	1.0	1.0	0.0	0.0	0.0	0.0	0.0	0.0	0.0	0.0	0.0	0.0	0.0	0.0
O00148	10212	uniprot	H. sapiens	10212	H. sapiens	1.0	1.0	0.0	0.0	0.0	0.0	0.0	0.0	0.0	0.0	0.0	0.0	1.0	0.0
O95159	7542	uniprot	H. sapiens	7542	H. sapiens	0.0	0.0	0.0	0.0	0.0	0.0	0.0	0.0	0.0	0.0	0.0	0.0	0.0	0.0
P28072	5694	uniprot	H. sapiens	5694	H. sapiens	1.0	0.0	1.0	1.0	0.0	0.0	1.0	0.0	1.0	0.0	0.0	0.0	0.0	0.0
Q15397	9933	uniprot	H. sapiens	9933	H. sapiens	0.0	0.0	0.0	0.0	0.0	0.0	0.0	0.0	0.0	0.0	0.0	0.0	0.0	0.0
Q13144	8893	uniprot	H. sapiens	8893	H. sapiens	0.0	0.0	0.0	0.0	1.0	0.0	0.0	0.0	0.0	0.0	0.0	0.0	0.0	0.0
Q9GZM5	25844	uniprot	H. sapiens	25844	H. sapiens	0.0	0.0	0.0	0.0	0.0	0.0	0.0	0.0	0.0	0.0	0.0	0.0	0.0	0.0
Q96CW1	1173	uniprot	H. sapiens	1173	H. sapiens	0.0	0.0	0.0	0.0	0.0	0.0	0.0	0.0	0.0	0.0	0.0	0.0	0.0	0.0
O76071	9391	uniprot	H. sapiens	9391	H. sapiens	0.0	0.0	0.0	0.0	0.0	0.0	0.0	0.0	0.0	0.0	0.0	0.0	0.0	0.0
Q9Y3S2	27309	uniprot	H. sapiens	27309	H. sapiens	0.0	0.0	0.0	0.0	0.0	0.0	0.0	0.0	0.0	0.0	0.0	0.0	0.0	0.0
Q13541	1978	uniprot	H. sapiens	1978	H. sapiens	0.0	0.0	0.0	0.0	1.0	0.0	0.0	0.0	0.0	0.0	0.0	0.0	0.0	0.0
Q2NKX8	54821	uniprot	H. sapiens	54821	H. sapiens	0.0	0.0	0.0	1.0	0.0	0.0	0.0	0.0	0.0	0.0	0.0	0.0	0.0	0.0
P04183	7083	uniprot	H. sapiens	7083	H. sapiens	0.0	0.0	0.0	1.0	0.0	0.0	0.0	1.0	0.0	0.0	0.0	0.0	0.0	0.0
Q9BWD1	39	uniprot	H. sapiens	39	H. sapiens	0.0	0.0	0.0	0.0	0.0	0.0	0.0	0.0	0.0	0.0	0.0	0.0	0.0	0.0
Q9UBL3	9070	uniprot	H. sapiens	9070	H. sapiens	0.0	0.0	0.0	0.0	0.0	0.0	0.0	0.0	0.0	0.0	0.0	0.0	0.0	0.0
P78346	10556	uniprot	H. sapiens	10556	H. sapiens	1.0	0.0	1.0	0.0	0.0	0.0	0.0	0.0	0.0	0.0	0.0	0.0	1.0	0.0
Q99661	11004	uniprot	H. sapiens	11004	H. sapiens	0.0	0.0	0.0	1.0	0.0	1.0	0.0	0.0	0.0	0.0	0.0	0.0	0.0	0.0
Q96B26	11340	uniprot	H. sapiens	11340	H. sapiens	1.0	0.0	1.0	0.0	0.0	0.0	0.0	0.0	0.0	0.0	0.0	0.0	0.0	0.0
Q9UKK9	11164	uniprot	H. sapiens	11164	H. sapiens	0.0	0.0	0.0	0.0	0.0	0.0	0.0	1.0	0.0	0.0	0.0	0.0	0.0	0.0
Q9BXB5	114884	uniprot	H. sapiens	114884	H. sapiens	0.0	0.0	0.0	0.0	0.0	0.0	0.0	0.0	0.0	0.0	0.0	0.0	0.0	0.0
P31942	3189	uniprot	H. sapiens	3189	H. sapiens	0.0	0.0	0.0	0.0	0.0	0.0	0.0	0.0	0.0	0.0	0.0	0.0	0.0	0.0
P35249	5984	uniprot	H. sapiens	5984	H. sapiens	0.0	0.0	0.0	1.0	0.0	0.0	1.0	0.0	0.0	0.0	0.0	0.0	0.0	0.0
Q9NV06	25879	uniprot	H. sapiens	25879	H. sapiens	1.0	0.0	1.0	0.0	0.0	0.0	0.0	0.0	0.0	1.0	0.0	0.0	0.0	0.0
Q9NQ55	56342	uniprot	H. sapiens	56342	H. sapiens	0.0	0.0	0.0	0.0	0.0	0.0	0.0	0.0	0.0	0.0	0.0	0.0	0.0	0.0
Q8TAE8	90480	uniprot	H. sapiens	90480	H. sapiens	0.0	0.0	0.0	0.0	1.0	0.0	0.0	0.0	0.0	0.0	0.0	0.0	0.0	0.0
Q9NWU2	54994	uniprot	H. sapiens	54994	H. sapiens	0.0	0.0	0.0	0.0	0.0	0.0	0.0	0.0	0.0	0.0	0.0	0.0	0.0	0.0
P49756	58517	uniprot	H. sapiens	58517	H. sapiens	1.0	1.0	0.0	0.0	0.0	0.0	0.0	0.0	0.0	0.0	0.0	0.0	0.0	0.0
Q96CN7	51015	uniprot	H. sapiens	51015	H. sapiens	0.0	0.0	0.0	0.0	0.0	0.0	0.0	0.0	0.0	0.0	0.0	0.0	0.0	0.0
O14908	10755	uniprot	H. sapiens	10755	H. sapiens	0.0	0.0	0.0	0.0	0.0	0.0	0.0	0.0	0.0	0.0	0.0	0.0	0.0	0.0
Q05048	1477	uniprot	H. sapiens	1477	H. sapiens	1.0	1.0	0.0	0.0	0.0	0.0	0.0	0.0	0.0	0.0	0.0	0.0	0.0	0.0
Q9NPD3	54512	uniprot	H. sapiens	54512	H. sapiens	1.0	0.0	1.0	0.0	0.0	0.0	0.0	0.0	0.0	0.0	0.0	0.0	0.0	0.0
Q86SX6	51218	uniprot	H. sapiens	51218	H. sapiens	0.0	0.0	0.0	0.0	0.0	0.0	0.0	0.0	0.0	0.0	0.0	0.0	0.0	0.0
P04080	1476	uniprot	H. sapiens	1476	H. sapiens	0.0	0.0	0.0	0.0	0.0	0.0	0.0	0.0	0.0	0.0	0.0	0.0	0.0	0.0
Q9UBX3	1468	uniprot	H. sapiens	1468	H. sapiens	0.0	0.0	0.0	0.0	0.0	0.0	0.0	0.0	0.0	0.0	0.0	0.0	0.0	0.0
Q96SZ5	84890	uniprot	H. sapiens	84890	H. sapiens	0.0	0.0	0.0	0.0	0.0	0.0	0.0	0.0	0.0	0.0	0.0	0.0	0.0	0.0
P62314	6632	uniprot	H. sapiens	6632	H. sapiens	1.0	1.0	0.0	0.0	0.0	0.0	0.0	0.0	1.0	0.0	0.0	0.0	0.0	0.0
Q9H974	79691	uniprot	H. sapiens	79691	H. sapiens	1.0	0.0	0.0	0.0	0.0	0.0	0.0	0.0	0.0	0.0	0.0	0.0	1.0	0.0
Q9H583	55127	uniprot	H. sapiens	55127	H. sapiens	1.0	0.0	1.0	0.0	0.0	0.0	0.0	0.0	0.0	1.0	0.0	0.0	0.0	0.0
O43264	9183	uniprot	H. sapiens	9183	H. sapiens	0.0	0.0	0.0	1.0	0.0	1.0	0.0	0.0	0.0	0.0	0.0	0.0	0.0	0.0
Q9BUE0	54797	uniprot	H. sapiens	54797	H. sapiens	0.0	0.0	0.0	0.0	0.0	0.0	0.0	0.0	1.0	0.0	0.0	0.0	0.0	0.0
Q12962	6881	uniprot	H. sapiens	6881	H. sapiens	0.0	0.0	0.0	0.0	0.0	0.0	1.0	0.0	1.0	0.0	0.0	0.0	0.0	1.0
Q8WXX5	23234	uniprot	H. sapiens	23234	H. sapiens	0.0	0.0	0.0	0.0	0.0	0.0	0.0	0.0	0.0	0.0	0.0	0.0	0.0	0.0
Q9H832	65264	uniprot	H. sapiens	65264	H. sapiens	0.0	0.0	0.0	0.0	0.0	0.0	0.0	0.0	0.0	0.0	0.0	0.0	0.0	0.0
P27694	6117	uniprot	H. sapiens	6117	H. sapiens	0.0	0.0	1.0	1.0	0.0	0.0	1.0	0.0	0.0	0.0	0.0	1.0	0.0	0.0
P50416	1374	uniprot	H. sapiens	1374	H. sapiens	0.0	0.0	0.0	0.0	0.0	0.0	0.0	0.0	0.0	0.0	0.0	0.0	0.0	0.0
Q13610	11137	uniprot	H. sapiens	11137	H. sapiens	0.0	0.0	0.0	0.0	0.0	0.0	0.0	0.0	0.0	0.0	0.0	0.0	0.0	0.0
Q9Y3B4	51639	uniprot	H. sapiens	51639	H. sapiens	1.0	1.0	0.0	0.0	0.0	0.0	0.0	0.0	0.0	0.0	0.0	0.0	0.0	0.0
O43633	27243	uniprot	H. sapiens	27243	H. sapiens	0.0	0.0	0.0	1.0	0.0	1.0	0.0	0.0	1.0	0.0	0.0	0.0	0.0	0.0
O96008	10452	uniprot	H. sapiens	10452	H. sapiens	0.0	0.0	0.0	0.0	0.0	0.0	0.0	0.0	0.0	0.0	1.0	0.0	0.0	0.0
Q06265	5393	uniprot	H. sapiens	5393	H. sapiens	1.0	0.0	1.0	0.0	0.0	0.0	0.0	0.0	0.0	0.0	0.0	0.0	0.0	0.0
Q86U44	56339	uniprot	H. sapiens	56339	H. sapiens	1.0	1.0	0.0	0.0	0.0	0.0	0.0	0.0	0.0	0.0	0.0	0.0	0.0	0.0
Q9H4H8	81610	uniprot	H. sapiens	81610	H. sapiens	0.0	0.0	0.0	0.0	0.0	0.0	0.0	0.0	0.0	0.0	0.0	0.0	0.0	0.0
Q6PL18	29028	uniprot	H. sapiens	29028	H. sapiens	0.0	0.0	0.0	0.0	0.0	0.0	0.0	0.0	0.0	0.0	0.0	0.0	0.0	0.0
Q8NFV4	83451	uniprot	H. sapiens	83451	H. sapiens	0.0	0.0	0.0	0.0	0.0	0.0	0.0	0.0	0.0	0.0	0.0	0.0	0.0	0.0
Q15007	9589	uniprot	H. sapiens	9589	H. sapiens	0.0	1.0	0.0	0.0	0.0	0.0	0.0	0.0	0.0	0.0	0.0	0.0	0.0	0.0
P23921	6240	uniprot	H. sapiens	6240	H. sapiens	0.0	0.0	0.0	0.0	0.0	0.0	0.0	1.0	0.0	0.0	0.0	0.0	0.0	0.0
P61081	9040	uniprot	H. sapiens	9040	H. sapiens	0.0	0.0	0.0	0.0	0.0	0.0	0.0	0.0	0.0	0.0	0.0	0.0	0.0	0.0
Q13907	3422	uniprot	H. sapiens	3422	H. sapiens	0.0	0.0	0.0	0.0	0.0	0.0	0.0	0.0	0.0	0.0	0.0	0.0	0.0	0.0
P19623	6723	uniprot	H. sapiens	6723	H. sapiens	0.0	0.0	0.0	0.0	0.0	0.0	0.0	0.0	0.0	0.0	0.0	0.0	0.0	0.0
P50583	318	uniprot	H. sapiens	318	H. sapiens	0.0	0.0	1.0	0.0	0.0	0.0	0.0	0.0	0.0	0.0	0.0	0.0	0.0	0.0
Q10472	2589	uniprot	H. sapiens	2589	H. sapiens	0.0	0.0	0.0	0.0	0.0	1.0	0.0	0.0	1.0	0.0	0.0	0.0	0.0	0.0
O00170	9049	uniprot	H. sapiens	9049	H. sapiens	0.0	0.0	0.0	0.0	0.0	0.0	0.0	0.0	0.0	0.0	0.0	0.0	0.0	0.0
P29372	4350	uniprot	H. sapiens	4350	H. sapiens	0.0	0.0	0.0	0.0	0.0	0.0	0.0	0.0	0.0	0.0	0.0	0.0	0.0	0.0
P49770	8892	uniprot	H. sapiens	8892	H. sapiens	0.0	0.0	0.0	0.0	1.0	0.0	0.0	0.0	0.0	0.0	0.0	0.0	0.0	0.0
O75531	8815	uniprot	H. sapiens	8815	H. sapiens	0.0	0.0	0.0	1.0	0.0	0.0	0.0	0.0	1.0	0.0	0.0	0.0	0.0	0.0
Q9H7Z7	80142	uniprot	H. sapiens	80142	H. sapiens	0.0	0.0	0.0	0.0	0.0	0.0	0.0	0.0	0.0	0.0	0.0	0.0	0.0	0.0
Q96BW1	139596	uniprot	H. sapiens	139596	H. sapiens	0.0	0.0	0.0	0.0	0.0	0.0	0.0	0.0	0.0	0.0	0.0	0.0	0.0	0.0
P40938	5983	uniprot	H. sapiens	5983	H. sapiens	0.0	0.0	0.0	1.0	0.0	0.0	1.0	0.0	0.0	0.0	0.0	0.0	0.0	0.0
Q3MHD2	124801	uniprot	H. sapiens	124801	H. sapiens	0.0	0.0	0.0	0.0	0.0	0.0	0.0	0.0	0.0	0.0	0.0	0.0	0.0	0.0
Q92688	10541	uniprot	H. sapiens	10541	H. sapiens	0.0	0.0	0.0	0.0	0.0	0.0	0.0	0.0	0.0	0.0	0.0	0.0	0.0	0.0
Q9UBU9	10482	uniprot	H. sapiens	10482	H. sapiens	1.0	1.0	0.0	0.0	0.0	0.0	0.0	0.0	0.0	0.0	0.0	0.0	1.0	0.0
Q99426	1155	uniprot	H. sapiens	1155	H. sapiens	0.0	0.0	0.0	0.0	0.0	0.0	0.0	0.0	0.0	0.0	0.0	0.0	0.0	0.0
Q8N8A6	317781	uniprot	H. sapiens	317781	H. sapiens	0.0	0.0	0.0	0.0	0.0	0.0	0.0	0.0	0.0	0.0	0.0	0.0	0.0	0.0
Q9UJX3						nan	nan	nan	nan	nan	nan	nan	nan	nan	nan	nan	nan	nan	nan
P29083	2960	uniprot	H. sapiens	2960	H. sapiens	0.0	0.0	0.0	0.0	0.0	0.0	0.0	0.0	1.0	0.0	0.0	0.0	0.0	1.0
P16104	3014	uniprot	H. sapiens	3014	H. sapiens	0.0	0.0	1.0	1.0	0.0	0.0	1.0	0.0	0.0	0.0	0.0	0.0	0.0	0.0
Q9UK41	51160	uniprot	H. sapiens	51160	H. sapiens	0.0	0.0	0.0	0.0	0.0	0.0	0.0	0.0	0.0	0.0	0.0	0.0	0.0	0.0
Q7Z569	8315	uniprot	H. sapiens	8315	H. sapiens	0.0	0.0	0.0	0.0	0.0	0.0	0.0	0.0	0.0	0.0	0.0	0.0	0.0	0.0
Q14320	9130	uniprot	H. sapiens	9130	H. sapiens	1.0	1.0	0.0	0.0	0.0	0.0	0.0	0.0	0.0	0.0	0.0	0.0	0.0	0.0
P26583	3148	uniprot	H. sapiens	3148	H. sapiens	0.0	0.0	0.0	0.0	0.0	0.0	0.0	0.0	0.0	0.0	0.0	0.0	0.0	0.0
Q6NXE6	93436	uniprot	H. sapiens	93436	H. sapiens	0.0	0.0	0.0	0.0	0.0	0.0	0.0	0.0	0.0	0.0	0.0	0.0	0.0	0.0
Q969Z0	9238	uniprot	H. sapiens	9238	H. sapiens	1.0	0.0	0.0	0.0	0.0	0.0	0.0	0.0	0.0	0.0	0.0	0.0	0.0	0.0
Q9Y295	4733	uniprot	H. sapiens	4733	H. sapiens	0.0	0.0	0.0	0.0	0.0	0.0	0.0	0.0	0.0	0.0	0.0	0.0	0.0	0.0
Q96AX1	65082	uniprot	H. sapiens	65082	H. sapiens	0.0	0.0	0.0	0.0	0.0	0.0	0.0	0.0	1.0	0.0	0.0	0.0	0.0	0.0
Q6AI12	91369	uniprot	H. sapiens	91369	H. sapiens	0.0	0.0	0.0	0.0	0.0	0.0	0.0	0.0	0.0	0.0	0.0	0.0	0.0	0.0
Q9BSF4	90580	uniprot	H. sapiens	90580	H. sapiens	0.0	0.0	0.0	0.0	0.0	0.0	0.0	0.0	0.0	0.0	0.0	0.0	0.0	0.0
Q15021	9918	uniprot	H. sapiens	9918	H. sapiens	0.0	0.0	0.0	1.0	0.0	0.0	0.0	0.0	0.0	0.0	0.0	0.0	0.0	0.0
Q14232	1967	uniprot	H. sapiens	1967	H. sapiens	0.0	0.0	0.0	0.0	1.0	0.0	0.0	0.0	0.0	0.0	0.0	0.0	0.0	0.0
Q9BQ61	79002	uniprot	H. sapiens	79002	H. sapiens	0.0	1.0	0.0	0.0	0.0	0.0	0.0	0.0	0.0	0.0	0.0	0.0	0.0	0.0
Q9GZL7	55759	uniprot	H. sapiens	55759	H. sapiens	1.0	0.0	1.0	0.0	0.0	0.0	0.0	0.0	0.0	0.0	0.0	0.0	0.0	0.0
Q8WTS6	80854	uniprot	H. sapiens	80854	H. sapiens	0.0	0.0	0.0	0.0	0.0	0.0	0.0	0.0	0.0	0.0	0.0	0.0	0.0	0.0
Q06203	5471	uniprot	H. sapiens	5471	H. sapiens	0.0	0.0	0.0	0.0	0.0	0.0	0.0	1.0	0.0	0.0	0.0	0.0	0.0	0.0
Q9NRN7	60496	uniprot	H. sapiens	60496	H. sapiens	0.0	0.0	0.0	0.0	0.0	0.0	0.0	0.0	0.0	0.0	0.0	0.0	0.0	0.0
Q9BW19	3833	uniprot	H. sapiens	3833	H. sapiens	0.0	0.0	0.0	0.0	0.0	1.0	0.0	0.0	0.0	0.0	0.0	0.0	0.0	0.0
Q9HAV7	80273	uniprot	H. sapiens	80273	H. sapiens	0.0	0.0	0.0	0.0	0.0	0.0	0.0	0.0	0.0	0.0	1.0	0.0	0.0	0.0
Q9H6W3	79697	uniprot	H. sapiens	79697	H. sapiens	0.0	0.0	0.0	0.0	0.0	0.0	0.0	0.0	0.0	0.0	0.0	0.0	0.0	0.0
Q9Y314	51070	uniprot	H. sapiens	51070	H. sapiens	0.0	0.0	0.0	0.0	0.0	0.0	0.0	0.0	0.0	0.0	0.0	0.0	0.0	0.0
Q04760	2739	uniprot	H. sapiens	2739	H. sapiens	0.0	0.0	0.0	0.0	0.0	0.0	0.0	0.0	0.0	0.0	0.0	0.0	0.0	0.0
Q9Y230	10856	uniprot	H. sapiens	10856	H. sapiens	0.0	0.0	0.0	1.0	0.0	0.0	1.0	0.0	0.0	0.0	0.0	0.0	0.0	0.0
Q5T5P2	56243	uniprot	H. sapiens	56243	H. sapiens	0.0	0.0	0.0	0.0	0.0	0.0	0.0	0.0	0.0	0.0	0.0	0.0	0.0	0.0
Q9Y3C6	51645	uniprot	H. sapiens	51645	H. sapiens	1.0	1.0	0.0	0.0	0.0	0.0	0.0	0.0	0.0	0.0	0.0	0.0	0.0	0.0
Q7L4I2	65117	uniprot	H. sapiens	65117	H. sapiens	0.0	0.0	0.0	0.0	0.0	0.0	0.0	0.0	0.0	0.0	0.0	0.0	0.0	0.0
Q92538	8729	uniprot	H. sapiens	8729	H. sapiens	0.0	0.0	0.0	0.0	0.0	1.0	0.0	0.0	0.0	0.0	0.0	0.0	0.0	0.0
Q8TDP1	84153	uniprot	H. sapiens	84153	H. sapiens	0.0	0.0	0.0	0.0	0.0	0.0	0.0	0.0	0.0	0.0	0.0	0.0	0.0	0.0
P57678	50628	uniprot	H. sapiens	50628	H. sapiens	1.0	0.0	0.0	0.0	0.0	0.0	0.0	0.0	1.0	0.0	0.0	0.0	0.0	0.0
Q3ZCQ8	92609	uniprot	H. sapiens	92609	H. sapiens	0.0	0.0	0.0	0.0	0.0	0.0	0.0	0.0	0.0	0.0	1.0	0.0	0.0	0.0
O95721	9342	uniprot	H. sapiens	9342	H. sapiens	0.0	0.0	0.0	0.0	0.0	1.0	0.0	0.0	0.0	0.0	0.0	0.0	0.0	0.0
P53701	3052	uniprot	H. sapiens	3052	H. sapiens	0.0	0.0	0.0	0.0	0.0	0.0	0.0	0.0	0.0	0.0	0.0	0.0	0.0	0.0
P61962	10238	uniprot	H. sapiens	10238	H. sapiens	0.0	0.0	0.0	0.0	0.0	0.0	0.0	0.0	0.0	0.0	0.0	0.0	0.0	0.0
Q6VMQ6	55729	uniprot	H. sapiens	55729	H. sapiens	0.0	0.0	0.0	0.0	0.0	0.0	0.0	0.0	0.0	0.0	0.0	0.0	0.0	0.0
Q9UPN7	22870	uniprot	H. sapiens	22870	H. sapiens	0.0	0.0	0.0	0.0	0.0	1.0	0.0	0.0	0.0	0.0	0.0	0.0	0.0	0.0
Q92609	9779	uniprot	H. sapiens	9779	H. sapiens	0.0	0.0	0.0	0.0	0.0	0.0	0.0	0.0	0.0	0.0	0.0	0.0	0.0	0.0
P46459	4905	uniprot	H. sapiens	4905	H. sapiens	0.0	0.0	0.0	0.0	0.0	1.0	0.0	0.0	0.0	0.0	0.0	0.0	0.0	0.0

## Sheet: Supplementary Table 2B
Supplementary table 2B. Enriched Reactome terms and functional clustering for selected overrepresented proteins. This table lists all significantly enriched terms, their associated cluster group ID, and the representative term summarizing each functional cluster. Session id: tbkg7aun7 (data: 19/06/2025)
GroupID	Category	Term	Description	LogP	Log(q-value)	Genes	Symbols	InTerm_InList
1_Summary	Reactome Gene Sets	R-HSA-8953854	Metabolism of RNA	-17.058	-13.3074	1477,5356,5393,5694,6632,9130,9238,10212,10482,10556,11340,23279,25879,50628,51010,51639,51645,54512,55127,55178,55759,56339,58517,79691,84135,84991	CSTF1,PLRG1,EXOSC9,PSMB6,SNRPD1,FAM50A,TBRG4,DDX39A,NXF1,RPP30,EXOSC8,NUP160,DCAF13,GEMIN4,EXOSC3,SF3B6,PPIL1,EXOSC4,HEATR1,MRM3,WDR12,METTL3,RBM25,QTRT2,UTP15,RBM17	26/-
1_Member	Reactome Gene Sets	R-HSA-8953854	Metabolism of RNA	-17.058	-13.3074	1477,5356,5393,5694,6632,9130,9238,10212,10482,10556,11340,23279,25879,50628,51010,51639,51645,54512,55127,55178,55759,56339,58517,79691,84135,84991	CSTF1,PLRG1,EXOSC9,PSMB6,SNRPD1,FAM50A,TBRG4,DDX39A,NXF1,RPP30,EXOSC8,NUP160,DCAF13,GEMIN4,EXOSC3,SF3B6,PPIL1,EXOSC4,HEATR1,MRM3,WDR12,METTL3,RBM25,QTRT2,UTP15,RBM17	26/644
2_Summary	Reactome Gene Sets	R-HSA-72203	Processing of Capped Intron-Containing Pre-mRNA	-8.83652	-5.38697	1477,5356,6632,9130,10212,10482,23279,51639,51645,56339,58517,84991,9589,79002	CSTF1,PLRG1,SNRPD1,FAM50A,DDX39A,NXF1,NUP160,SF3B6,PPIL1,METTL3,RBM25,RBM17,WTAP,TRIR	14/-
2_Member	Reactome Gene Sets	R-HSA-72203	Processing of Capped Intron-Containing Pre-mRNA	-8.83652	-5.38697	1477,5356,6632,9130,10212,10482,23279,51639,51645,56339,58517,84991	CSTF1,PLRG1,SNRPD1,FAM50A,DDX39A,NXF1,NUP160,SF3B6,PPIL1,METTL3,RBM25,RBM17	12/252
2_Member	CORUM	CORUM:351	Spliceosome	-6.63835	-3.92916	5356,6632,9589,51639,51645,58517,79002,84991	PLRG1,SNRPD1,WTAP,SF3B6,PPIL1,RBM25,TRIR,RBM17	8/141
2_Member	Reactome Gene Sets	R-HSA-72163	mRNA Splicing - Major Pathway	-4.72837	-2.42495	5356,6632,9130,51639,51645,58517,84991	PLRG1,SNRPD1,FAM50A,SF3B6,PPIL1,RBM25,RBM17	7/184
2_Member	Reactome Gene Sets	R-HSA-72172	mRNA Splicing	-4.62412	-2.33593	5356,6632,9130,51639,51645,58517,84991	PLRG1,SNRPD1,FAM50A,SF3B6,PPIL1,RBM25,RBM17	7/191
2_Member	CORUM	CORUM:2755	17S U2 snRNP	-3.37742	-1.45264	6632,51639,84991	SNRPD1,SF3B6,RBM17	3/33
2_Member	CORUM	CORUM:1181	C complex spliceosome	-2.28049	-0.575223	5356,6632,51645	PLRG1,SNRPD1,PPIL1	3/79
3_Summary	Reactome Gene Sets	R-HSA-72312	rRNA processing	-7.66704	-4.40815	5393,10556,11340,25879,51010,54512,55127,55178,55759,84135,5694,318,3014,6117,23279	EXOSC9,RPP30,EXOSC8,DCAF13,EXOSC3,EXOSC4,HEATR1,MRM3,WDR12,UTP15,PSMB6,NUDT2,H2AX,RPA1,NUP160	15/-
3_Member	Reactome Gene Sets	R-HSA-72312	rRNA processing	-7.66704	-4.40815	5393,10556,11340,25879,51010,54512,55127,55178,55759,84135	EXOSC9,RPP30,EXOSC8,DCAF13,EXOSC3,EXOSC4,HEATR1,MRM3,WDR12,UTP15	10/199
3_Member	CORUM	CORUM:788	Exosome	-7.12271	-4.15027	5393,11340,51010,54512	EXOSC9,EXOSC8,EXOSC3,EXOSC4	4/10
3_Member	CORUM	CORUM:789	Exosome	-6.92791	-4.04407	5393,11340,51010,54512	EXOSC9,EXOSC8,EXOSC3,EXOSC4	4/11
3_Member	Reactome Gene Sets	R-HSA-6791226	Major pathway of rRNA processing in the nucleolus and cytosol	-6.89157	-4.04407	5393,10556,11340,25879,51010,54512,55127,55759,84135	EXOSC9,RPP30,EXOSC8,DCAF13,EXOSC3,EXOSC4,HEATR1,WDR12,UTP15	9/182
3_Member	CORUM	CORUM:7443	Exosome	-6.75331	-3.96267	5393,11340,51010,54512	EXOSC9,EXOSC8,EXOSC3,EXOSC4	4/12
3_Member	Reactome Gene Sets	R-HSA-8868773	rRNA processing in the nucleus and cytosol	-6.71326	-3.96267	5393,10556,11340,25879,51010,54512,55127,55759,84135	EXOSC9,RPP30,EXOSC8,DCAF13,EXOSC3,EXOSC4,HEATR1,WDR12,UTP15	9/191
3_Member	Reactome Gene Sets	R-HSA-450385	Butyrate Response Factor 1 (BRF1) binds and destabilizes mRNA	-6.45047	-3.81382	5393,11340,51010,54512	EXOSC9,EXOSC8,EXOSC3,EXOSC4	4/14
3_Member	Reactome Gene Sets	R-HSA-450513	Tristetraprolin (TTP, ZFP36) binds and destabilizes mRNA	-6.45047	-3.81382	5393,11340,51010,54512	EXOSC9,EXOSC8,EXOSC3,EXOSC4	4/14
3_Member	Reactome Gene Sets	R-HSA-450604	KSRP (KHSRP) binds and destabilizes mRNA	-6.31726	-3.7128	5393,11340,51010,54512	EXOSC9,EXOSC8,EXOSC3,EXOSC4	4/15
3_Member	Reactome Gene Sets	R-HSA-429958	mRNA decay by 3' to 5' exoribonuclease	-6.19381	-3.61932	5393,11340,51010,54512	EXOSC9,EXOSC8,EXOSC3,EXOSC4	4/16
3_Member	Reactome Gene Sets	R-HSA-380994	ATF4 activates genes in response to endoplasmic reticulum stress	-5.59862	-3.19046	5393,11340,51010,54512	EXOSC9,EXOSC8,EXOSC3,EXOSC4	4/22
3_Member	Reactome Gene Sets	R-HSA-381042	PERK regulates gene expression	-5.22601	-2.8904	5393,11340,51010,54512	EXOSC9,EXOSC8,EXOSC3,EXOSC4	4/27
3_Member	Reactome Gene Sets	R-HSA-450531	Regulation of mRNA stability by proteins that bind AU-rich elements	-5.04569	-2.72647	5393,5694,11340,51010,54512	EXOSC9,PSMB6,EXOSC8,EXOSC3,EXOSC4	5/63
3_Member	Reactome Gene Sets	R-HSA-429914	Deadenylation-dependent mRNA decay	-4.32391	-2.12963	5393,11340,51010,54512	EXOSC9,EXOSC8,EXOSC3,EXOSC4	4/45
3_Member	Reactome Gene Sets	R-HSA-381119	Unfolded Protein Response (UPR)	-3.32941	-1.43008	5393,11340,51010,54512	EXOSC9,EXOSC8,EXOSC3,EXOSC4	4/81
3_Member	Reactome Gene Sets	R-HSA-2262752	Cellular responses to stress	-2.43427	-0.692283	318,3014,5393,5694,6117,11340,23279,51010,54512	NUDT2,H2AX,EXOSC9,PSMB6,RPA1,EXOSC8,NUP160,EXOSC3,EXOSC4	9/690
3_Member	Reactome Gene Sets	R-HSA-8953897	Cellular responses to stimuli	-2.06859	-0.389884	318,3014,5393,5694,6117,11340,23279,51010,54512	NUDT2,H2AX,EXOSC9,PSMB6,RPA1,EXOSC8,NUP160,EXOSC3,EXOSC4	9/788
4_Summary	Reactome Gene Sets	R-HSA-69278	Cell Cycle, Mitotic	-7.55667	-4.40815	3014,5694,5885,5983,5984,6117,7083,8815,9183,9918,11004,23279,27243,54821,10856	H2AX,PSMB6,RAD21,RFC3,RFC4,RPA1,TK1,BANF1,ZW10,NCAPD2,KIF2C,NUP160,CHMP2A,ERCC6L,RUVBL2	15/-
4_Member	Reactome Gene Sets	R-HSA-69278	Cell Cycle, Mitotic	-7.55667	-4.40815	3014,5694,5885,5983,5984,6117,7083,8815,9183,9918,11004,23279,27243,54821	H2AX,PSMB6,RAD21,RFC3,RFC4,RPA1,TK1,BANF1,ZW10,NCAPD2,KIF2C,NUP160,CHMP2A,ERCC6L	14/475
4_Member	Reactome Gene Sets	R-HSA-1640170	Cell Cycle	-7.27889	-4.22727	3014,5694,5885,5983,5984,6117,7083,8815,9183,9918,10856,11004,23279,27243,54821	H2AX,PSMB6,RAD21,RFC3,RFC4,RPA1,TK1,BANF1,ZW10,NCAPD2,RUVBL2,KIF2C,NUP160,CHMP2A,ERCC6L	15/584
4_Member	Reactome Gene Sets	R-HSA-69620	Cell Cycle Checkpoints	-5.92771	-3.40758	3014,5694,5983,5984,6117,9183,11004,23279,54821	H2AX,PSMB6,RFC3,RFC4,RPA1,ZW10,KIF2C,NUP160,ERCC6L	9/237
4_Member	Reactome Gene Sets	R-HSA-68882	Mitotic Anaphase	-5.72667	-3.28092	5694,5885,8815,9183,11004,23279,27243,54821	PSMB6,RAD21,BANF1,ZW10,KIF2C,NUP160,CHMP2A,ERCC6L	8/186
4_Member	Reactome Gene Sets	R-HSA-2555396	Mitotic Metaphase and Anaphase	-5.70929	-3.28092	5694,5885,8815,9183,11004,23279,27243,54821	PSMB6,RAD21,BANF1,ZW10,KIF2C,NUP160,CHMP2A,ERCC6L	8/187
4_Member	Reactome Gene Sets	R-HSA-68886	M Phase	-5.37231	-3.00194	3014,5694,5885,8815,9183,9918,11004,23279,27243,54821	H2AX,PSMB6,RAD21,BANF1,ZW10,NCAPD2,KIF2C,NUP160,CHMP2A,ERCC6L	10/354
4_Member	Reactome Gene Sets	R-HSA-2467813	Separation of Sister Chromatids	-4.2447	-2.06231	5694,5885,9183,11004,23279,54821	PSMB6,RAD21,ZW10,KIF2C,NUP160,ERCC6L	6/150
4_Member	Reactome Gene Sets	R-HSA-2500257	Resolution of Sister Chromatid Cohesion	-3.93355	-1.82642	5885,9183,11004,23279,54821	RAD21,ZW10,KIF2C,NUP160,ERCC6L	5/107
4_Member	Reactome Gene Sets	R-HSA-68877	Mitotic Prometaphase	-3.90303	-1.80566	5885,9183,9918,11004,23279,54821	RAD21,ZW10,NCAPD2,KIF2C,NUP160,ERCC6L	6/173
4_Member	Reactome Gene Sets	R-HSA-141424	Amplification of signal from the kinetochores	-3.37072	-1.45264	9183,11004,23279,54821	ZW10,KIF2C,NUP160,ERCC6L	4/79
4_Member	Reactome Gene Sets	R-HSA-141444	Amplification of signal from unattached kinetochores via a MAD2 inhibitory signal	-3.37072	-1.45264	9183,11004,23279,54821	ZW10,KIF2C,NUP160,ERCC6L	4/79
4_Member	Reactome Gene Sets	R-HSA-69618	Mitotic Spindle Checkpoint	-3.1029	-1.23366	9183,11004,23279,54821	ZW10,KIF2C,NUP160,ERCC6L	4/93
4_Member	Reactome Gene Sets	R-HSA-9648025	EML4 and NUDC in mitotic spindle formation	-3.00142	-1.15932	9183,11004,23279,54821	ZW10,KIF2C,NUP160,ERCC6L	4/99
4_Member	Reactome Gene Sets	R-HSA-5663220	RHO GTPases Activate Formins	-2.73363	-0.932435	9183,11004,23279,54821	ZW10,KIF2C,NUP160,ERCC6L	4/117
4_Member	Reactome Gene Sets	R-HSA-195258	RHO GTPase Effectors	-2.09483	-0.404945	3014,9183,11004,23279,54821	H2AX,ZW10,KIF2C,NUP160,ERCC6L	5/278
5_Summary	CORUM	CORUM:7292	EIF2B1-EIF2B2-EIF2B3-EIF2B4-EIF2B5 complex	-6.07489	-3.52842	1967,8892,8893,1978,90480	EIF2B1,EIF2B2,EIF2B5,EIF4EBP1,GADD45GIP1	5/-
5_Member	CORUM	CORUM:7292	EIF2B1-EIF2B2-EIF2B3-EIF2B4-EIF2B5 complex	-6.07489	-3.52842	1967,8892,8893	EIF2B1,EIF2B2,EIF2B5	3/5
5_Member	Reactome Gene Sets	R-HSA-72731	Recycling of eIF2:GDP	-5.33093	-2.97829	1967,8892,8893	EIF2B1,EIF2B2,EIF2B5	3/8
5_Member	Reactome Gene Sets	R-HSA-72613	Eukaryotic Translation Initiation	-2.76103	-0.949964	1967,1978,8892,8893	EIF2B1,EIF4EBP1,EIF2B2,EIF2B5	4/115
5_Member	Reactome Gene Sets	R-HSA-72737	Cap-dependent Translation Initiation	-2.76103	-0.949964	1967,1978,8892,8893	EIF2B1,EIF4EBP1,EIF2B2,EIF2B5	4/115
5_Member	Reactome Gene Sets	R-HSA-72766	Translation	-2.08217	-0.396043	1967,1978,8892,8893,90480	EIF2B1,EIF4EBP1,EIF2B2,EIF2B5,GADD45GIP1	5/280
6_Summary	Reactome Gene Sets	R-HSA-8856688	Golgi-to-ER retrograde transport	-5.88114	-3.38583	2589,3833,4905,8729,8774,9183,11004,9342,382,22870,27243	GALNT1,KIFC1,NSF,GBF1,NAPG,ZW10,KIF2C,SNAP29,ARF6,PPP6R1,CHMP2A	11/-
6_Member	Reactome Gene Sets	R-HSA-8856688	Golgi-to-ER retrograde transport	-5.88114	-3.38583	2589,3833,4905,8729,8774,9183,11004	GALNT1,KIFC1,NSF,GBF1,NAPG,ZW10,KIF2C	7/123
6_Member	Reactome Gene Sets	R-HSA-6811442	Intra-Golgi and retrograde Golgi-to-ER traffic	-5.77946	-3.30763	2589,3833,4905,8729,8774,9183,9342,11004	GALNT1,KIFC1,NSF,GBF1,NAPG,ZW10,SNAP29,KIF2C	8/183
6_Member	Reactome Gene Sets	R-HSA-6811434	COPI-dependent Golgi-to-ER retrograde traffic	-5.42851	-3.03965	3833,4905,8729,8774,9183,11004	KIFC1,NSF,GBF1,NAPG,ZW10,KIF2C	6/93
6_Member	Reactome Gene Sets	R-HSA-199991	Membrane Trafficking	-4.43078	-2.18535	382,2589,3833,4905,8729,8774,9183,9342,11004,22870,27243	ARF6,GALNT1,KIFC1,NSF,GBF1,NAPG,ZW10,SNAP29,KIF2C,PPP6R1,CHMP2A	11/553
6_Member	Reactome Gene Sets	R-HSA-5653656	Vesicle-mediated transport	-4.21149	-2.05197	382,2589,3833,4905,8729,8774,9183,9342,11004,22870,27243	ARF6,GALNT1,KIFC1,NSF,GBF1,NAPG,ZW10,SNAP29,KIF2C,PPP6R1,CHMP2A	11/585
6_Member	Reactome Gene Sets	R-HSA-6811438	Intra-Golgi traffic	-3.09775	-1.23366	4905,8774,9342	NSF,NAPG,SNAP29	3/41
6_Member	Reactome Gene Sets	R-HSA-204005	COPII-mediated vesicle transport	-2.6178	-0.844937	4905,8774,22870	NSF,NAPG,PPP6R1	3/60
6_Member	Reactome Gene Sets	R-HSA-199977	ER to Golgi Anterograde Transport	-2.46309	-0.716828	4905,8729,8774,22870	NSF,GBF1,NAPG,PPP6R1	4/139
6_Member	Reactome Gene Sets	R-HSA-948021	Transport to the Golgi and subsequent modification	-2.15533	-0.457822	4905,8729,8774,22870	NSF,GBF1,NAPG,PPP6R1	4/170
6_Member	Reactome Gene Sets	R-HSA-6807878	COPI-mediated anterograde transport	-2.07212	-0.389884	4905,8729,8774	NSF,GBF1,NAPG	3/94
7_Summary	Reactome Gene Sets	R-HSA-6804756	Regulation of TP53 Activity through Phosphorylation	-4.51163	-2.23817	5562,5983,5984,6117,6881,10856,3014,5694,5885	PRKAA1,RFC3,RFC4,RPA1,TAF10,RUVBL2,H2AX,PSMB6,RAD21	9/-
7_Member	Reactome Gene Sets	R-HSA-6804756	Regulation of TP53 Activity through Phosphorylation	-4.51163	-2.23817	5562,5983,5984,6117,6881	PRKAA1,RFC3,RFC4,RPA1,TAF10	5/81
7_Member	Reactome Gene Sets	R-HSA-110312	Translesion synthesis by REV1	-4.43097	-2.18535	5983,5984,6117	RFC3,RFC4,RPA1	3/15
7_Member	Reactome Gene Sets	R-HSA-5655862	Translesion synthesis by POLK	-4.34221	-2.12963	5983,5984,6117	RFC3,RFC4,RPA1	3/16
7_Member	Reactome Gene Sets	R-HSA-5656121	Translesion synthesis by POLI	-4.34221	-2.12963	5983,5984,6117	RFC3,RFC4,RPA1	3/16
7_Member	Reactome Gene Sets	R-HSA-180786	Extension of Telomeres	-4.32391	-2.12963	5983,5984,6117,10856	RFC3,RFC4,RPA1,RUVBL2	4/45
7_Member	Reactome Gene Sets	R-HSA-110320	Translesion Synthesis by POLH	-4.18152	-2.03299	5983,5984,6117	RFC3,RFC4,RPA1	3/18
7_Member	Reactome Gene Sets	R-HSA-69186	Lagging Strand Synthesis	-4.10829	-1.97049	5983,5984,6117	RFC3,RFC4,RPA1	3/19
7_Member	Reactome Gene Sets	R-HSA-5651801	PCNA-Dependent Long Patch Base Excision Repair	-4.03912	-1.91178	5983,5984,6117	RFC3,RFC4,RPA1	3/20
7_Member	Reactome Gene Sets	R-HSA-157579	Telomere Maintenance	-3.97226	-1.85514	3014,5983,5984,6117,10856	H2AX,RFC3,RFC4,RPA1,RUVBL2	5/105
7_Member	Reactome Gene Sets	R-HSA-5696397	Gap-filling DNA repair synthesis and ligation in GG-NER	-3.85202	-1.77354	5983,5984,6117	RFC3,RFC4,RPA1	3/23
7_Member	Reactome Gene Sets	R-HSA-110373	Resolution of AP sites via the multiple-nucleotide patch replacement pathway	-3.74133	-1.67198	5983,5984,6117	RFC3,RFC4,RPA1	3/25
7_Member	Reactome Gene Sets	R-HSA-5685938	HDR through Single Strand Annealing (SSA)	-3.63974	-1.58812	5983,5984,6117	RFC3,RFC4,RPA1	3/27
7_Member	Reactome Gene Sets	R-HSA-9709570	Impaired BRCA2 binding to RAD51	-3.63974	-1.58812	5983,5984,6117	RFC3,RFC4,RPA1	3/27
7_Member	Reactome Gene Sets	R-HSA-5633007	Regulation of TP53 Activity	-3.58551	-1.55155	5562,5983,5984,6117,6881	PRKAA1,RFC3,RFC4,RPA1,TAF10	5/127
7_Member	Reactome Gene Sets	R-HSA-73886	Chromosome Maintenance	-3.58551	-1.55155	3014,5983,5984,6117,10856	H2AX,RFC3,RFC4,RPA1,RUVBL2	5/127
7_Member	Reactome Gene Sets	R-HSA-110314	Recognition of DNA damage by PCNA-containing replication complex	-3.54591	-1.54351	5983,5984,6117	RFC3,RFC4,RPA1	3/29
7_Member	Reactome Gene Sets	R-HSA-174417	Telomere C-strand (Lagging Strand) Synthesis	-3.54591	-1.54351	5983,5984,6117	RFC3,RFC4,RPA1	3/29
7_Member	Reactome Gene Sets	R-HSA-69242	S Phase	-3.52322	-1.52851	5694,5885,5983,5984,6117	PSMB6,RAD21,RFC3,RFC4,RPA1	5/131
7_Member	Reactome Gene Sets	R-HSA-69481	G2/M Checkpoints	-3.50798	-1.52182	3014,5694,5983,5984,6117	H2AX,PSMB6,RFC3,RFC4,RPA1	5/132
7_Member	Reactome Gene Sets	R-HSA-69190	DNA strand elongation	-3.50155	-1.52182	5983,5984,6117	RFC3,RFC4,RPA1	3/30
7_Member	Reactome Gene Sets	R-HSA-5656169	Termination of translesion DNA synthesis	-3.45875	-1.48632	5983,5984,6117	RFC3,RFC4,RPA1	3/31
7_Member	Reactome Gene Sets	R-HSA-5693616	Presynaptic phase of homologous DNA pairing and strand exchange	-3.41741	-1.473	5983,5984,6117	RFC3,RFC4,RPA1	3/32
7_Member	Reactome Gene Sets	R-HSA-73933	Resolution of Abasic Sites (AP sites)	-3.41741	-1.473	5983,5984,6117	RFC3,RFC4,RPA1	3/32
7_Member	Reactome Gene Sets	R-HSA-9675136	Diseases of DNA Double-Strand Break Repair	-3.41741	-1.473	5983,5984,6117	RFC3,RFC4,RPA1	3/32
7_Member	Reactome Gene Sets	R-HSA-9701190	Defective homologous recombination repair (HRR) due to BRCA2 loss of function	-3.41741	-1.473	5983,5984,6117	RFC3,RFC4,RPA1	3/32
7_Member	Reactome Gene Sets	R-HSA-176187	Activation of ATR in response to replication stress	-3.37742	-1.45264	5983,5984,6117	RFC3,RFC4,RPA1	3/33
7_Member	Reactome Gene Sets	R-HSA-5693579	Homologous DNA Pairing and Strand Exchange	-3.3387	-1.43008	5983,5984,6117	RFC3,RFC4,RPA1	3/34
7_Member	Reactome Gene Sets	R-HSA-69473	G2/M DNA damage checkpoint	-3.32941	-1.43008	3014,5983,5984,6117	H2AX,RFC3,RFC4,RPA1	4/81
7_Member	Reactome Gene Sets	R-HSA-73884	Base Excision Repair	-3.30917	-1.41592	3014,5983,5984,6117	H2AX,RFC3,RFC4,RPA1	4/82
7_Member	Reactome Gene Sets	R-HSA-5693607	Processing of DNA double-strand break ends	-3.23083	-1.34357	3014,5983,5984,6117	H2AX,RFC3,RFC4,RPA1	4/86
7_Member	Reactome Gene Sets	R-HSA-110313	Translesion synthesis by Y family DNA polymerases bypasses lesions on DNA template	-3.19517	-1.31964	5983,5984,6117	RFC3,RFC4,RPA1	3/38
7_Member	Reactome Gene Sets	R-HSA-5696400	Dual Incision in GG-NER	-3.19517	-1.31964	5983,5984,6117	RFC3,RFC4,RPA1	3/38
7_Member	Reactome Gene Sets	R-HSA-9675135	Diseases of DNA repair	-3.06697	-1.20848	5983,5984,6117	RFC3,RFC4,RPA1	3/42
7_Member	Reactome Gene Sets	R-HSA-69239	Synthesis of DNA	-3.05129	-1.19833	5694,5983,5984,6117	PSMB6,RFC3,RFC4,RPA1	4/96
7_Member	Reactome Gene Sets	R-HSA-69306	DNA Replication	-3.02055	-1.17306	3014,5694,5983,5984,6117	H2AX,PSMB6,RFC3,RFC4,RPA1	5/169
7_Member	Reactome Gene Sets	R-HSA-73893	DNA Damage Bypass	-2.92399	-1.10283	5983,5984,6117	RFC3,RFC4,RPA1	3/47
7_Member	Reactome Gene Sets	R-HSA-5693567	HDR through Homologous Recombination (HRR) or Single Strand Annealing (SSA)	-2.70675	-0.910408	3014,5983,5984,6117	H2AX,RFC3,RFC4,RPA1	4/119
7_Member	Reactome Gene Sets	R-HSA-6782210	Gap-filling DNA repair synthesis and ligation in TC-NER	-2.65995	-0.868403	5983,5984,6117	RFC3,RFC4,RPA1	3/58
7_Member	Reactome Gene Sets	R-HSA-5693538	Homology Directed Repair	-2.65448	-0.867685	3014,5983,5984,6117	H2AX,RFC3,RFC4,RPA1	4/123
7_Member	Reactome Gene Sets	R-HSA-6782135	Dual incision in TC-NER	-2.63868	-0.861222	5983,5984,6117	RFC3,RFC4,RPA1	3/59
7_Member	Reactome Gene Sets	R-HSA-5685942	HDR through Homologous Recombination (HRR)	-2.59729	-0.828978	5983,5984,6117	RFC3,RFC4,RPA1	3/61
7_Member	Reactome Gene Sets	R-HSA-5693532	DNA Double-Strand Break Repair	-2.41915	-0.685596	3014,5983,5984,6117	H2AX,RFC3,RFC4,RPA1	4/143
7_Member	Reactome Gene Sets	R-HSA-6781827	Transcription-Coupled Nucleotide Excision Repair (TC-NER)	-2.41036	-0.680965	5983,5984,6117	RFC3,RFC4,RPA1	3/71
7_Member	Reactome Gene Sets	R-HSA-5696399	Global Genome Nucleotide Excision Repair (GG-NER)	-2.31155	-0.602358	5983,5984,6117	RFC3,RFC4,RPA1	3/77
7_Member	Reactome Gene Sets	R-HSA-3700989	Transcriptional Regulation by TP53	-2.02655	-0.351511	5562,5983,5984,6117,6881	PRKAA1,RFC3,RFC4,RPA1,TAF10	5/289
7_Member	Reactome Gene Sets	R-HSA-5696398	Nucleotide Excision Repair	-2.01081	-0.343013	5983,5984,6117	RFC3,RFC4,RPA1	3/99
8_Summary	Reactome Gene Sets	R-HSA-15869	Metabolism of nucleotides	-4.22289	-2.05209	4860,5471,6240,7083,11164	PNP,PPAT,RRM1,TK1,NUDT5	5/-
8_Member	Reactome Gene Sets	R-HSA-15869	Metabolism of nucleotides	-4.22289	-2.05209	4860,5471,6240,7083,11164	PNP,PPAT,RRM1,TK1,NUDT5	5/93
9_Summary	Reactome Gene Sets	R-HSA-162906	HIV Infection	-3.88935	-1.80152	2960,5694,6881,8815,23279,27243,2589,6632,50628,54797,65082	GTF2E1,PSMB6,TAF10,BANF1,NUP160,CHMP2A,GALNT1,SNRPD1,GEMIN4,MED18,VPS33A	11/-
9_Member	Reactome Gene Sets	R-HSA-162906	HIV Infection	-3.88935	-1.80152	2960,5694,6881,8815,23279,27243	GTF2E1,PSMB6,TAF10,BANF1,NUP160,CHMP2A	6/174
9_Member	Reactome Gene Sets	R-HSA-9824446	Viral Infection Pathways	-3.5759	-1.55155	2589,2960,5694,6632,6881,8815,23279,27243,50628,54797,65082	GALNT1,GTF2E1,PSMB6,SNRPD1,TAF10,BANF1,NUP160,CHMP2A,GEMIN4,MED18,VPS33A	11/692
9_Member	Reactome Gene Sets	R-HSA-162587	HIV Life Cycle	-3.56974	-1.55155	2960,6881,8815,23279,27243	GTF2E1,TAF10,BANF1,NUP160,CHMP2A	5/128
9_Member	Reactome Gene Sets	R-HSA-9694516	SARS-CoV-2 Infection	-2.98146	-1.14469	2589,6632,23279,27243,50628,65082	GALNT1,SNRPD1,NUP160,CHMP2A,GEMIN4,VPS33A	6/258
9_Member	Reactome Gene Sets	R-HSA-191859	snRNP Assembly	-2.95124	-1.12493	6632,23279,50628	SNRPD1,NUP160,GEMIN4	3/46
9_Member	Reactome Gene Sets	R-HSA-194441	Metabolism of non-coding RNA	-2.95124	-1.12493	6632,23279,50628	SNRPD1,NUP160,GEMIN4	3/46
9_Member	Reactome Gene Sets	R-HSA-162599	Late Phase of HIV Life Cycle	-2.73363	-0.932435	2960,6881,23279,27243	GTF2E1,TAF10,NUP160,CHMP2A	4/117
9_Member	Reactome Gene Sets	R-HSA-2995410	Nuclear Envelope (NE) Reassembly	-2.57715	-0.817789	8815,23279,27243	BANF1,NUP160,CHMP2A	3/62
9_Member	Reactome Gene Sets	R-HSA-9679506	SARS-CoV Infections	-2.38327	-0.662068	2589,6632,23279,27243,50628,65082	GALNT1,SNRPD1,NUP160,CHMP2A,GEMIN4,VPS33A	6/340
9_Member	Reactome Gene Sets	R-HSA-162909	Host Interactions of HIV factors	-2.16437	-0.463007	5694,8815,23279	PSMB6,BANF1,NUP160	3/87
9_Member	Reactome Gene Sets	R-HSA-9705683	SARS-CoV-2-host interactions	-2.10332	-0.409637	6632,23279,50628,65082	SNRPD1,NUP160,GEMIN4,VPS33A	4/176
10_Summary	Reactome Gene Sets	R-HSA-6790901	rRNA modification in the nucleus and cytosol	-2.63868	-0.861222	25879,55127,84135	DCAF13,HEATR1,UTP15	3/-
10_Member	Reactome Gene Sets	R-HSA-6790901	rRNA modification in the nucleus and cytosol	-2.63868	-0.861222	25879,55127,84135	DCAF13,HEATR1,UTP15	3/59
11_Summary	Reactome Gene Sets	R-HSA-1268020	Mitochondrial protein import	-2.57715	-0.817789	10452,80273,92609	TOMM40,GRPEL1,TIMM50	3/-
11_Member	Reactome Gene Sets	R-HSA-1268020	Mitochondrial protein import	-2.57715	-0.817789	10452,80273,92609	TOMM40,GRPEL1,TIMM50	3/62
12_Summary	Reactome Gene Sets	R-HSA-3108214	SUMOylation of DNA damage response and repair proteins	-2.5379	-0.782948	5885,6117,23279,7150	RAD21,RPA1,NUP160,TOP1	4/-
12_Member	Reactome Gene Sets	R-HSA-3108214	SUMOylation of DNA damage response and repair proteins	-2.5379	-0.782948	5885,6117,23279	RAD21,RPA1,NUP160	3/64
12_Member	Reactome Gene Sets	R-HSA-3108232	SUMO E3 ligases SUMOylate target proteins	-2.43	-0.692253	5885,6117,7150,23279	RAD21,RPA1,TOP1,NUP160	4/142
12_Member	Reactome Gene Sets	R-HSA-2990846	SUMOylation	-2.36616	-0.653	5885,6117,7150,23279	RAD21,RPA1,TOP1,NUP160	4/148
13_Summary	Reactome Gene Sets	R-HSA-159236	Transport of Mature mRNA derived from an Intron-Containing Transcript	-2.51877	-0.768186	10212,10482,23279,10556,79691	DDX39A,NXF1,NUP160,RPP30,QTRT2	5/-
13_Member	Reactome Gene Sets	R-HSA-159236	Transport of Mature mRNA derived from an Intron-Containing Transcript	-2.51877	-0.768186	10212,10482,23279	DDX39A,NXF1,NUP160	3/65
13_Member	Reactome Gene Sets	R-HSA-72202	Transport of Mature Transcript to Cytoplasm	-2.39327	-0.66799	10212,10482,23279	DDX39A,NXF1,NUP160	3/72
13_Member	Reactome Gene Sets	R-HSA-72306	tRNA processing	-2.01081	-0.343013	10556,23279,79691	RPP30,NUP160,QTRT2	3/99
14_Summary	Reactome Gene Sets	R-HSA-674695	RNA Polymerase II Pre-transcription Events	-2.37644	-0.659275	2960,6881,9646	GTF2E1,TAF10,CTR9	3/-
14_Member	Reactome Gene Sets	R-HSA-674695	RNA Polymerase II Pre-transcription Events	-2.37644	-0.659275	2960,6881,9646	GTF2E1,TAF10,CTR9	3/73

## Sheet: Supplementary Table 2C
Supplementary Table 2C. Hierarchical classification of KEGG BRITE categories assigned to each overrepresented orthologous protein. The classification is organized by levels (Level 1 to Level 4) according to KEGG Brite ontology. HSA: Homo sapiens. CLF: Canis lupus familiaris.
Uniprot HSA	UniProt CLF	Gene	KO_Id	Level 1	Level 2	Level 3	Level 4
P62330	A0A8C0LQW9	ARF6	K07941	Brite Hierarchies	Protein families: signaling and cellular processes	GTP-binding proteins	Arf [OT]
				Brite Hierarchies	Protein families: signaling and cellular processes	Exosome	Exosomal proteins of haemopoietic cells
				Brite Hierarchies	Protein families: genetic information processing	Membrane trafficking	Endocytosis
				Brite Hierarchies	Protein families: genetic information processing	Membrane trafficking	Endocytosis
				Cellular Processes	Transport and catabolism	Endocytosis
				Environmental Information Processing	Signal transduction	Ras signaling pathway
				Environmental Information Processing	Signal transduction	Phospholipase D signaling pathway
Q9GZP4	A0A8C0LUT7	PITHD1	hsa: 57095
Q96I25	A0A8C0LVF0	RBM17	K12840	Genetic Information Processing	Transcription	Spliceosome
A6NDG6	A0A8C0LW98	PGP	K19269	Metabolism	Carbohydrate metabolism	Glyoxylate and dicarboxylate metabolism
				Brite Hierarchies	Protein families: metabolism	Protein phosphatases and associated proteins	HAD phosphatases
Q6P4I2	A0A8C0LYL3	WDR73	K24754	Brite Hierarchies	Protein families: signaling and cellular processes	Domain-containing proteins not elsewhere classified	WD40 repeat (WDR) domain-containing proteins
Q8TED0	A0A8C0M0J2	UTP15	K14549	Genetic Information Processing	Translation	Ribosome biogenesis in eukaryotes
Q9NVE7	A0A8C0M330	PANK4	K24265	Not Included in Pathway or Brite	Unclassified: metabolism	Cofactor metabolism
Q13131	A0A8C0M4B9	PRKAA1	K07198	Environmental Information Processing	Signal transduction	FoxO signaling pathway
				Environmental Information Processing	Signal transduction	PI3K-Akt signaling pathway
				Environmental Information Processing	Signal transduction	AMPK signaling pathway
				Environmental Information Processing	Signal transduction	mTOR signaling pathway
				Cellular Processes	Transport and catabolism	Autophagy - animal
				Cellular Processes	Cellular community - eukaryotes	Tight junction
				Brite Hierarchies	Protein families: metabolism	Protein kinases	CAMKL family
				Brite Hierarchies	Protein families: genetic information processing	Membrane trafficking	Autophagy
				Brite Hierarchies	Protein families: genetic information processing	Mitochondrial biogenesis	Regulator of mitochondrial biogenesis
Q6PD62	A0A8C0M5X6	CTR9	K15176	Brite Hierarchies	Protein families: genetic information processing	Transcription machinery	PAF1 complex
Q01664	A0A8C0M9X8	TFAP4	K09108	Human Diseases	Cancer: overview	Proteoglycans in cancer
				Brite Hierarchies	Protein families: genetic information processing	Transcription factors	Ubiquitous bHLH-ZIP factors
Q9HC36	A0A8C0MAM8	MRM3	K20095	Brite Hierarchies	Protein families: genetic information processing	Ribosome biogenesis	Other ribosome biogenesis factors
O15400	A0A8C0MCE1	STX7	K08488	Genetic Information Processing	Folding, sorting and degradation	SNARE interactions in vesicular transport
				Cellular Processes	Transport and catabolism	Phagosome
				Cellular Processes	Transport and catabolism	Autophagy - animal
				Brite Hierarchies	Protein families: genetic information processing	Membrane trafficking	SNARE
				Brite Hierarchies	Protein families: signaling and cellular processes	Exosome	Exosomal proteins of haemopoietic cells
O60216	A0A8C0MCU4	RAD21	K06670	Cellular Processes	Cell growth and death	Cell cycle
				Brite Hierarchies	Protein families: genetic information processing	Chromosome and associated proteins	Sister chromatid cohesion proteins
Q2TAA2	A0A8C0MD95	IAH1	K23978	Not Included in Pathway or Brite	Unclassified: metabolism	Enzymes with EC numbers
Q99747	A0A8C0MDB0	NAPG	K21198	Brite Hierarchies	Protein families: genetic information processing	Membrane trafficking	SNARE
Q9NQT5	A0A8C0MDE6	EXOSC3	K03681	Genetic Information Processing	Folding, sorting and degradation	RNA degradation
				Brite Hierarchies	Protein families: genetic information processing	Messenger RNA biogenesis	Core exosome factors
O95433	A0A8C0MDY8	AHSA1	K26216	Brite Hierarchies	Protein families: genetic information processing	Chaperones and folding catalysts	Other chaperones and cochaperones
O75312	A0A8C0MHI6	ZPR1	K06874	Brite Hierarchies	Protein families: genetic information processing	Spliceosome	Proteins involved in snRNP biogenesi
P11387	A0A8C0MIF6	TOP1	K03163	Brite Hierarchies	Protein families: genetic information processing	DNA replication proteins	DNA Topoisomerases
Q12769	A0A8C0MKQ1	NUP160	K14303	Genetic Information Processing	Translation	Nucleocytoplasmic transport
				Brite Hierarchies	Protein families: genetic information processing	Messenger RNA biogenesis	Nuclear pore complex
				Brite Hierarchies	Protein families: genetic information processing	Chromosome and associated proteins	Centrosome formation proteins
P00491	A0A8C0MLT7	PNP	K03783	Metabolism	Nucleotide metabolism	Purine metabolism
				Metabolism	Metabolism of cofactors and vitamins	Nicotinate and nicotinamide metabolism
Q9NRL2	A0A8C0MMS2	BAZ1A	K11655	Genetic Information Processing	Chromosome	ATP-dependent chromatin remodeling
				Brite Hierarchies	Protein families: genetic information processing	Chromosome and associated proteins	Chromatin remodeling factors
O43660	A0A8C0MN88	PLRG1	K12862	Genetic Information Processing	Transcription	Spliceosome
				Brite Hierarchies	Protein families: genetic information processing	Spliceosome	Prp19 complex
				Brite Hierarchies	Protein families: genetic information processing	DNA repair and recombination proteins	PSO4 complex
O00148	A0A8C0MN98	DDX39A	K13182	Brite Hierarchies	Protein families: genetic information processing	Spliceosome	RNA helicase-like proteins
O95159	A0A8C0MSY3	ZFPL1	hsa: 7542
P28072	A0A8C0MYP5	PSMB6	K02738	Genetic Information Processing	Folding, sorting and degradation	Proteasome
				Brite Hierarchies	Protein families: metabolism	Peptidases and inhibitors	Family T1: proteasome family
				Brite Hierarchies	Protein families: genetic information processing	Proteasome	Core particles (20S proteasome)
Q15397	A0A8C0MZS3	PUM3	K14844	Brite Hierarchies	Protein families: genetic information processing	Messenger RNA biogenesis	Cargo complex
				Brite Hierarchies	Protein families: genetic information processing	Ribosome biogenesis	Pre-60S particles
Q13144	A0A8C0N2D6	EIF2B5	K03240	Brite Hierarchies	Protein families: genetic information processing	Translation factors	eIF-2B
Q9GZM5	A0A8C0N2S9	YIPF3	K22941	Brite Hierarchies	Protein families: genetic information processing	Membrane trafficking	Endoplasmic reticulum (ER) - Golgi transport
Q96CW1	A0A8C0N3K7	AP2M1	K11826	Cellular Processes	Transport and catabolism	Endocytosis
				Brite Hierarchies	Protein families: genetic information processing	Membrane trafficking	Endocytosis
O76071	A0A8C0N7E3	CIAO1	K24730	Brite Hierarchies	Protein families: genetic information processing	Chromosome and associated proteins	Centrosome formation proteins
				Brite Hierarchies	Protein families: genetic information processing	DNA repair and recombination proteins	NER (nucleotide excision repair)
Q9Y3S2	A0A8C0NA32	ZNF330	hsa: 27309
Q13541	A0A8C0NCE2	EIF4EBP1	K07205	Environmental Information Processing	Signal transduction	ErbB signaling pathway
				Environmental Information Processing	Signal transduction	HIF-1 signaling pathway
				Environmental Information Processing	Signal transduction	PI3K-Akt signaling pathway
				Environmental Information Processing	Signal transduction	AMPK signaling pathway
				Environmental Information Processing	Signal transduction	mTOR signaling pathway
				Cellular Processes	Cell growth and death	Cellular senescence
				Human Diseases	Cancer: overview	Chemical carcinogenesis - receptor activation
Q2NKX8	A0A8C0ND40	ERCC6L	K20093	Brite Hierarchies	Protein families: genetic information processing	Chromosome and associated proteins	Centromeric chromatin formation proteins
P04183	A0A8C0NFL6	TK1	K00857	Metabolism	Nucleotide metabolism	Pyrimidine metabolism
Q9BWD1	A0A8C0NFX7	ACAT2	K00626	Metabolism	Carbohydrate metabolism	Pyruvate metabolism
				Metabolism	Carbohydrate metabolism	Glyoxylate and dicarboxylate metabolism
				Metabolism	Lipid metabolism	Fatty acid degradation
				Brite Hierarchies	Protein families: signaling and cellular processes	Exosome	Exosomal proteins of other body fluids (saliva and urine)
Q9UBL3	A0A8C0NHA5	ASH2L	K14964	Brite Hierarchies	Protein families: genetic information processing	Chromosome and associated proteins	Histone modification proteins
P78346	A0A8C0NI19	RPP30	K03539	Genetic Information Processing	Translation	Ribosome biogenesis in eukaryotes
				Brite Hierarchies	Protein families: genetic information processing	Ribosome biogenesis	Pre-60S particles
				Brite Hierarchies	Protein families: genetic information processing	Transfer RNA biogenesis	Ribonucrease P
P78346	A0A8C0NI19	RPP30	K03539	Brite Hierarchies	Protein families: genetic information processing	Mitochondrial biogenesis	RNase MRP
Q99661	A0A8C0NI34	KIF2C	K10393	Cellular Processes	Cell motility	Motor proteins
				Brite Hierarchies	Protein families: genetic information processing	Chromosome and associated proteins	Centromeric chromatin formation proteins
				Brite Hierarchies	Protein families: genetic information processing	Chromosome and associated proteins	Centrosome formation proteins
				Brite Hierarchies	Protein families: signaling and cellular processes	Cytoskeleton proteins	Tubulin-binding proteins
Q96B26	A0A8C0NKF1	EXOSC8	K12586	Genetic Information Processing	Folding, sorting and degradation	RNA degradation
				Brite Hierarchies	Protein families: genetic information processing	Messenger RNA biogenesis	Core exosome factors
Q9UKK9	A0A8C0NM54	NUDT5	K13987	Metabolism	Nucleotide metabolism	Purine metabolism
Q9BXB5	A0A8C0NNG9	OSBPL10	K20465	Brite Hierarchies	Protein families: genetic information processing	Membrane trafficking	Endoplasmic reticulum (ER) - Golgi transport
P31942	A0A8C0NUW8	HNRNPH3	K12898	Brite Hierarchies	Protein families: genetic information processing	Spliceosome	hnRNP proteins
P35249	A0A8C0NVT2	RFC4	K10755	Genetic Information Processing	Replication and repair	DNA replication
				Genetic Information Processing	Replication and repair	Base excision repair
				Genetic Information Processing	Replication and repair	Nucleotide excision repair
				Genetic Information Processing	Replication and repair	Mismatch repair
				Brite Hierarchies	Protein families: genetic information processing	DNA replication proteins	RFC (replication factor C)
				Brite Hierarchies	Protein families: genetic information processing	Chromosome and associated proteins	Sister chromatid cohesion proteins
Q9NV06	A0A8C0NZT7	DCAF13	K11806	Brite Hierarchies	Protein families: genetic information processing	Ribosome biogenesis	90S particles
				Brite Hierarchies	Protein families: genetic information processing	Ubiquitin system	Ubiquitin ligases (E3)
Q9NQ55	A0A8C0P0X4	PPAN	K14859	Brite Hierarchies	Protein families: genetic information processing	Ribosome biogenesis	Pre-60S particles
Q8TAE8	A0A8C0P5A7	GADD45GIP1	hsa: 90480
Q9NWU2	A0A8C0P6T9	GID8	K23338	Brite Hierarchies	Protein families: genetic information processing	Ubiquitin system	Ubiquitin ligases (E3)
P49756	A0A8C0P827	RBM25	K12822	Genetic Information Processing	Transcription	Spliceosome
Q96CN7	A0A8C0P851	ISOC1	hsa: 51015
O14908	A0A8C0PHY2	GIPC1	K20056	Brite Hierarchies	Protein families: genetic information processing	Membrane trafficking	Endocytosis
Q05048	A0A8C0PJK5	CSTF1	K14406	Genetic Information Processing	Translation	mRNA surveillance pathway
				Brite Hierarchies	Protein families: genetic information processing	Messenger RNA biogenesis	Cleavage stimulation factor (CSTF) complex
Q9NPD3	A0A8C0PMC8	EXOSC4	K11600	Genetic Information Processing	Folding, sorting and degradation	RNA degradation
Q86SX6	A0A8C0PND9	GLRX5	K07390	Brite Hierarchies	Protein families: genetic information processing	Chaperones and folding catalysts	Protein disulfide isomerase
Q86SX6	A0A8C0PND9	GLRX5	K07390	Brite Hierarchies	Protein families: genetic information processing	Mitochondrial biogenesis	Proteins involved in Fe-S cluster biogenesis
P04080	A0A8C0PP51	CSTB	K13907	Brite Hierarchies	Protein families: metabolism	Peptidases and inhibitors	Family I25: cystatin family
				Brite Hierarchies	Protein families: signaling and cellular processes	Exosome	Exosomal proteins of other body fluids (saliva and urine)
Q9UBX3	A0A8C0PPZ1	SLC25A10	K13577	Organismal System	Excretory system	Proximal tubule bicarbonate reclamation
				Brite Hierarchies	Protein families: signaling and cellular processes	Transporters	SLC25: Mitochondrial carrier
Q96SZ5	A0A8C0PS52	ADO	K10712	Metabolism	Metabolism of other amino acids	Taurine and hypotaurine metabolism
P62314	A0A8C0PT23	SNRPD1	K11087	Genetic Information Processing	Transcription	Spliceosome
Q9H974	A0A8C0PW06	QTRT2	K15407	Brite Hierarchies	Protein families: genetic information processing	Transfer RNA biogenesis	tRNA modification factors
Q9H583	A0A8C0PXP5	HEATR1	K14550	Genetic Information Processing	Translation	Ribosome biogenesis in eukaryotes
O43264	A0A8C0Q002	ZW10	K11578	Brite Hierarchies	Protein families: genetic information processing	Membrane trafficking	Endoplasmic reticulum (ER) - Golgi transport
				Brite Hierarchies	Protein families: genetic information processing	Chromosome and associated proteins	Centromeric chromatin formation proteins
Q9BUE0	A0A8C0Q308	MED18	K15135	Brite Hierarchies	Protein families: genetic information processing	Transcription machinery	Mediator complex
Q12962	A0A8C0Q3H0	TAF10	K03134	Genetic Information Processing	Transcription	Basal transcription factors
				Brite Hierarchies	Protein families: genetic information processing	Transcription machinery	RNA polymerase II system
				Brite Hierarchies	Protein families: genetic information processing	Chromosome and associated proteins	Histone modification proteins
Q8WXX5	A0A8C0Q503	DNAJC9	K09529	Brite Hierarchies	Protein families: genetic information processing	Chaperones and folding catalysts	HSP40 / DNAJ
Q9H832	A0A8C0Q5G0	UBE2Z	K10585	Genetic Information Processing	Folding, sorting and degradation	Ubiquitin mediated proteolysis
				Brite Hierarchies	Protein families: genetic information processing	Ubiquitin system	Ubiquitin-conjugating enzymes (E2)
P27694	A0A8C0Q875	RPA1	K07466	Genetic Information Processing	Replication and repair	DNA replication
				Genetic Information Processing	Replication and repair	Nucleotide excision repair
				Genetic Information Processing	Replication and repair	Mismatch repair
				Genetic Information Processing	Replication and repair	Homologous recombination
				Brite Hierarchies	Protein families: genetic information processing	Transcription factors	Zinc finger
				Brite Hierarchies	Protein families: genetic information processing	DNA replication proteins	DNA Replication Elongation Factors
				Brite Hierarchies	Protein families: genetic information processing	DNA repair and recombination proteins
P50416	A0A8C0QDA8	CPT1A	K08765	Metabolism	Lipid metabolism	Fatty acid degradation
				Environmental Information Processing	Signal transduction	AMPK signaling pathway
				Organismal System	Endocrine system	PPAR signaling pathway
				Brite Hierarchies	Protein families: genetic information processing	Mitochondrial biogenesis	Regulator of mitochondrial biogenesis
Q13610	A0A8C0QFE7	PWP1	K14791	Brite Hierarchies	Protein families: genetic information processing	Ribosome biogenesis	90S particles
Q9Y3B4	A0A8C0QGX1	SF3B6	K12833	Genetic Information Processing	Transcription	Spliceosome
				Brite Hierarchies	Protein families: genetic information processing	Spliceosome	Complex A, B, C
O43633	A0A8C0R9T3	CHMP2A	K12191	Cellular Processes	Transport and catabolism	Endocytosis
				Cellular Processes	Cell growth and death	Necroptosis
				Brite Hierarchies	Protein families: genetic information processing	Membrane trafficking	Endosome - Lysosome transport
				Brite Hierarchies	Protein families: signaling and cellular processes	Exosome	Exosomal proteins of other body fluids (saliva and urine)
				Brite Hierarchies	Protein families: signaling and cellular processes	Exosome	Exosomal proteins of haemopoietic cells
O96008	A0A8C0RAS4	TOMM40	K11518	Cellular Processes	Transport and catabolism	Mitophagy - animal
				Brite Hierarchies	Protein families: genetic information processing	Mitochondrial biogenesis	Transporter outer membrane (TOM) complex
				Brite Hierarchies	Protein families: signaling and cellular processes	Transporters	Primary active transporters
Q06265	A0A8C0RC43	EXOSC9	K03678	Genetic Information Processing	Folding, sorting and degradation	RNA degradation
				Brite Hierarchies	Protein families: genetic information processing	Messenger RNA biogenesis	Core exosome factors
Q86U44	A0A8C0RD13	METTL3	K05925	Brite Hierarchies	Protein families: genetic information processing	Messenger RNA biogenesis	N6-methyltransferase complex
Q9H4H8	A0A8C0RD96	FAM83D	K16805	Brite Hierarchies	Protein families: genetic information processing	Chromosome and associated proteins	Centrosome formation proteins
Q6PL18	A0A8C0REJ2	ATAD2	K22531	Not Included in Pathway or Brite	Unclassified: metabolism	Enzymes with EC numbers
Q8NFV4	A0A8C0RIU2	ABHD11	K13703	Brite Hierarchies	Protein families: metabolism	Peptidases and inhibitors	Serine peptidases
Q15007	A0A8C0RJM3	WTAP	K22824	Brite Hierarchies	Protein families: genetic information processing	Messenger RNA biogenesis	N6-methyltransferase complex
P23921	A0A8C0RNZ0	RRM1	K10807	Metabolism	Nucleotide metabolism	Pyrimidine metabolism
				Metabolism	Metabolism of other amino acids	Glutathione metabolism
				Brite Hierarchies	Protein families: genetic information processing	DNA repair and recombination proteins	Modulation of nucleotide pools
P61081	A0A8C0RW57	UBE2M	K10579	Genetic Information Processing	Folding, sorting and degradation	Ubiquitin mediated proteolysis	UBL-conjugating enzymes
Q13907	A0A8C0RW74	IDI1	K01823	Metabolism	Metabolism of terpenoids and polyketides	Terpenoid backbone biosynthesis
P19623	A0A8C0S062	SRM	K00797	Metabolism	Amino acid metabolism	Cysteine and methionine metabolism
				Metabolism	Amino acid metabolism	Arginine and proline metabolism
				Metabolism	Metabolism of other amino acids	Glutathione metabolism
P50583	A0A8C0S0Q8	NUDT2	K01518	Metabolism	Nucleotide metabolism	Purine metabolism
				Metabolism	Nucleotide metabolism	Pyrimidine metabolism
Q10472	A0A8C0S1X7	GALNT1	K00710	Metabolism	Glycan biosynthesis and metabolism	Mucin type O-glycan biosynthesis
				Brite Hierarchies	Protein families: metabolism	Glycosyltransferases	Mucin-type
O00170	A0A8C0S8A4	AIP	K17767	Human Diseases	Cancer: overview	Chemical carcinogenesis - receptor activation
				Brite Hierarchies	Protein families: genetic information processing	Mitochondrial biogenesis	Mitochondrial protein import machinery
P29372	A0A8C0S9W0	MPG	K03652	Genetic Information Processing	Replication and repair	Base excision repair
				Brite Hierarchies	Protein families: genetic information processing	DNA repair and recombination proteins	DNA glycosylases
P49770	A0A8C0SJF8	EIF2B2	K03754	Brite Hierarchies	Protein families: genetic information processing	Translation factors	Initiation factors
O75531	A0A8C0SLN6	BANF1	K21870	Brite Hierarchies	Protein families: genetic information processing	Chromosome and associated proteins	Histone modification proteins
Q9H7Z7	A0A8C0SNP1	PTGES2	K05309	Metabolism	Lipid metabolism	Arachidonic acid metabolism
Q96BW1	A0A8C0SP36	UPRT	k00761	Metabolism	Nucleotide metabolism	Pyrimidine metabolism
P40938	A0A8C0SRC2	RFC3	K10756	Genetic Information Processing	Replication and repair	DNA replication
				Genetic Information Processing	Replication and repair	Base excision repair
				Genetic Information Processing	Replication and repair	Nucleotide excision repair
				Genetic Information Processing	Replication and repair	Mismatch repair
				Brite Hierarchies	Protein families: genetic information processing	DNA replication proteins	DNA Replication Elongation/Termination Factors
				Brite Hierarchies	Protein families: genetic information processing	Chromosome and associated proteins	Sister chromatid cohesion proteins
				Brite Hierarchies	Protein families: genetic information processing	DNA repair and recombination proteins	RFC (replication factor C)
Q3MHD2	A0A8C0SZN9	LSM12	K23643	Organismal System	nvironmental adaptation	Circadian rhythm - fly
Q92688	A0A8C0T1B7	ANP32B	K18647	Brite Hierarchies	Protein families: genetic information processing	Messenger RNA biogenesis	Ran-mediated transport factors
Q9UBU9	A0A8C0T1C8	NXF1	K14284	Genetic Information Processing	Translation	Nucleocytoplasmic transport
				Genetic Information Processing	Translation	mRNA surveillance pathway
				Genetic Information Processing	Translation	Ribosome biogenesis in eukaryotes
				Brite Hierarchies	Protein families: genetic information processing	Messenger RNA biogenesis	Nuclear pore complex
				Brite Hierarchies	Protein families: genetic information processing	Ribosome biogenesis	Stress granule specific factors
Q99426	A0A8C0T3Z6	TBCB	K17262	Brite Hierarchies	Protein families: signaling and cellular processe	Cytoskeleton proteins	Tubulin-binding proteins
				Brite Hierarchies	Protein families: signaling and cellular processe	Exosome	Exosomal proteins of haemopoietic cells
Q8N8A6	A0A8C0T5K5	DDX51	K14807	Brite Hierarchies	Protein families: genetic information processing	Ribosome biogenesis	Helicases
Q9UJX3	A0A8C0T6K5	ANAPC7	K03354	Genetic Information Processing	Folding, sorting and degradation	Ubiquitin mediated proteolysis
				Cellular Processes	Cell growth and death	Cell cycle
				Organismal System	Endocrine system	Progesterone-mediated oocyte maturation
				Brite Hierarchies	Protein families: genetic information processing	Ubiquitin system	APC/C
				Brite Hierarchies	Protein families: genetic information processing	Chromosome and associated proteins	Sister chromatid separation proteins
P29083	A0A8C0T8L9	GTF2E1	K03136	Genetic Information Processing	Transcription	Basal transcription factors
				Human Diseases	Cancer: overview	Viral carcinogenesis
				Brite Hierarchies	Protein families: genetic information processing	Transcription machinery	Basal transcription factors
P16104	A0A8C0TAR3	H2AX	K11251	Genetic Information Processing	Chromosome	ATP-dependent chromatin remodeling
				Brite Hierarchies	Protein families: genetic information processing	Chromosome and associated proteins	Nucleosome assembly factors
				Brite Hierarchies	Protein families: genetic information processing	Protein families: signaling and cellular processes	Exosomal proteins of haemopoietic cells
Q9UK41	A0A8C0TAV5	VPS28	K12184	Cellular Processes	Transport and catabolism	Endocytosis
				Brite Hierarchies	Protein families: genetic information processing	Membrane trafficking	Endosome - Lysosome transport
				Brite Hierarchies	Protein families: signaling and cellular processes	Exosome	Exosomal proteins of haemopoietic cells
Q7Z569	A0A8C0TCH9	BRAP	K10632	Environmental Information Processing	Signal transduction	Ras signaling pathway
				Brite Hierarchies	Protein families: genetic information processing	Ubiquitin system	Other single Ring-finger type E3
Q14320	A0A8C0TCX7	FAM50A	K13119	Brite Hierarchies	Protein families: genetic information processing	Spliceosome	Complex C specific factors
P26583	A0A8C0TCZ5	HMGB2	K11295	Brite Hierarchies	Protein families: genetic information processing	Chromosome and associated proteins	Nucleosome assembly factors
				Brite Hierarchies	Protein families: signaling and cellular processes	Exosome	Exosomal proteins of colorectal cancer cells
Q6NXE6	A0A8C0TFU2	ARMC6	K24166	Brite Hierarchies	Protein families: signaling and cellular processes	Domain-containing proteins not elsewhere classified	Armadillo repeat domain-containing proteins
Q969Z0	A0A8C0TIP6	TBRG4	K27756	Brite Hierarchies	Protein families: genetic information processing	Mitochondrial biogenesis	Mitochondrial transcription and translation factors
Q9Y295	A0A8C0TNH3	DRG1	K06944	Brite Hierarchies	Protein families: genetic information processing	Translation factors	Elongation associated factors
				Brite Hierarchies	Protein families: genetic information processing	Chromosome and associated proteins	Centrosome formation proteins
Q96AX1	A0A8C0TSZ8	VPS33A	K20182	Cellular Processes	Transport and catabolism	Autophagy - animal
				Cellular Processes	Transport and catabolism	Efferocytosis
				Brite Hierarchies	Protein families: genetic information processing	Membrane trafficking	Endosome - Lysosome transport
Q6AI12	A0A8C0TZW5	ANKRD40	hsa: 91369
Q9BSF4	A0A8C0Z0M5	TIMM29	hsa: 90580
Q15021	A0A8C0Z2G8	NCAPD2	K06677	Brite Hierarchies	Protein families: genetic information processing	Chromosome and associated proteins	Chromosome condensation proteins
Q14232	A0A8C0Z5H2	EIF2B1	K03239	Brite Hierarchies	Protein families: genetic information processing	Translation factors	Initiation factors eIF-2B
Q9BQ61	A0A8C0Z5Z6	TRIR	K01149	Brite Hierarchies	Protein families: genetic information processing	DNA replication proteins	DNA Replication Termination Factors
Q9GZL7	A0A8I3P0V5	WDR12	K14863	Brite Hierarchies	Protein families: genetic information processing	Ribosome biogenesis	Pre-60S particles
Q8WTS6	A0A8C0NI41	SETD7	K11431	Metabolism	Amino acid metabolism	Lysine degradation
				Environmental Information Processing	Signal transduction	FoxO signaling pathway
				Brite Hierarchies	Protein families: genetic information processing	Chromosome and associated proteins	Histone modification proteins
Q06203	A0A8C0P4I5	PPAT	K00764	Metabolism	Nucleotide metabolism	Purine metabolism
				Metabolism	Amino acid metabolism	Alanine, aspartate and glutamate metabolism
				Brite Hierarchies	Protein families: metabolism	Peptidases and inhibitors	Family C44
Q9NRN7	A0A8C0MM41	AASDHPPT	K06133	Metabolism	Metabolism of cofactors and vitamins	Pantothenate and CoA biosynthesis
Q9BW19	A0A8C0N1A6	KIFC1	K10405	Cellular Processes	Cell motility	Motor proteins
				Brite Hierarchies	Protein families: genetic information processing	Chromosome and associated proteins	Centrosome formation proteins
				Brite Hierarchies	Protein families: signaling and cellular processes	Cytoskeleton proteins	Tubulin-binding proteins
Q9HAV7	A0A8C0RW25	GRPEL1	K03687	Brite Hierarchies	Protein families: genetic information processing	Chaperones and folding catalysts	HSP24
				Brite Hierarchies	Protein families: genetic information processing	Mitochondrial biogenesis	MMC/PAM proteins
Q9H6W3	A0A8C0PGJ2	RIOX1	K16914	Brite Hierarchies	Protein families: genetic information processing	Ribosome biogenesis	Pre-60S particles
				Brite Hierarchies	Protein families: genetic information processing	Chromosome and associated proteins	Histone modification proteins
Q9Y314	A0A8C0LRW8	NOSIP	K13125	Brite Hierarchies	Protein families: genetic information processing	Spliceosome	Complex C specific factors
Q04760	A0A8C0TFS1	GLO1	K01759	Metabolism	Carbohydrate metabolism	Pyruvate metabolism
Q9Y230	A0A8C0NK68	RUVBL2	K11338	Genetic Information Processing	Chromosome	ATP-dependent chromatin remodeling
				Brite Hierarchies	Protein families: genetic information processing	Chromosome and associated proteins	Histone modification proteins
				Brite Hierarchies	Protein families: signaling and cellular processes	Cilium and associated proteins	Dynein assembly factors
Q5T5P2	A0A8C0NJP5	KIAA1217	hsa: 56243
Q9Y3C6	A0A8C0N2E1	PPIL1	K12733	Genetic Information Processing	Transcription	Spliceosome
				Brite Hierarchies	Protein families: genetic information processing	Spliceosome	Prp19-related factors
				Brite Hierarchies	Protein families: genetic information processing	Chaperones and folding catalysts	Cyclophilin
Q7L4I2	A0A8C0PXP8	RSRC2	K24595	Not Included in Pathway or Brite	Unclassified: signaling and cellular processes	Signaling proteins
Q92538	A0A8C0PDT0	GBF1	K18443	Cellular Processes	Transport and catabolism	Endocytosis
				Brite Hierarchies	Protein families: genetic information processing	Membrane trafficking	Endosome - Golgi transport
Q8TDP1	A0A8C0N800	RNASEH2C	K10745	Genetic Information Processing	Replication and repair	DNA replication
				Brite Hierarchies	Protein families: genetic information processing	DNA replication proteins	RNase H
P57678	A0A8C0Q178	GEMIN4	K13132	Brite Hierarchies	Protein families: genetic information processing	Spliceosome	SMN complex factors
Q3ZCQ8	A0A8C0LSB4	TIMM50	K17496	Brite Hierarchies	Protein families: genetic information processing	Mitochondrial biogenesis	TIM23 complex
				Brite Hierarchies	Protein families: signaling and cellular processes	Transporters	Primary active transporters
O95721	A0A8C0PP81	SNAP29	K08509	Genetic Information Processing	Folding, sorting and degradation	SNARE interactions in vesicular transport
				Cellular Processes	Transport and catabolism	Autophagy - animal
				Brite Hierarchies	Protein families: genetic information processing	Membrane trafficking	Exocytosis
P53701	A0A8C0MP16	HCCS	K01764	Metabolism	Metabolism of cofactors and vitamins	Porphyrin metabolism
P61962	A0A8C0SS63	DCAF7	K11805	Genetic Information Processing	Chromosome	Polycomb repressive complex
				Brite Hierarchies	Protein families: genetic information processing	Ubiquitin system	Ubiquitin ligases (E3)
				Brite Hierarchies	Protein families: genetic information processing	Chromosome and associated proteins	Histone modification proteins
Q6VMQ6	A0A8C0PHR8	ATF7IP	K25802	Brite Hierarchies	Protein families: genetic information processing	Chromosome and associated proteins	Heterochromatin formation proteins
Q9UPN7	A0A8C0LRG6	PPP6R1	K15499	Brite Hierarchies	Protein families: metabolism	Protein phosphatases and associated proteins	Phosphoprotein phosphatases (PPPs)
				Brite Hierarchies	Protein families: genetic information processing	DNA repair and recombination proteins	DSBR (double strand breaks repair)
Q92609	A0A8C0PAG3	TBC1D5	K18469	Brite Hierarchies	Protein families: genetic information processing	Membrane trafficking	Endosome - Lysosome transport
P46459	A0A8C0MRX1	NSF	K06027	Cellular Processes	Transport and catabolism	Autophagy - yeast
				Brite Hierarchies	Protein families: genetic information processing	Membrane trafficking	SNARE
