# Supplementary material for: Comparative proteomic analysis in human and canine breast cancer cell line: identification of proteins linked to lipid dynamics and functions
Source: Research Square preprint supplement (doi:10.21203/rs.3.rs-8132817/v1), 2025-12-04
Supplement: Supplementary file 2 [file 56bebc73eb0663c41018b4b8.xlsx]

## Sheet: Supplementary Table 3A
Supplementary Table 3A. Gene annotation and binary enrichment results for selected underrepresented proteins using the Reactome database. Includes Uniprot identifier, functional annotations, term memberships and binary values (1/0) indicating presence within enriched Reactome terms. Session id: tnyb2jxgl (data: 19/06/2025)
MyList	Gene ID	Type	Tax ID	Homologene Gene ID	Homologene Gene Tax ID	R-HSA-1474244 Extracellular matrix organizat	R-HSA-1280215 Cytokine Signaling in Immune s	R-HSA-556833 Metabolism of lipids	R-HSA-9006934 Signaling by Receptor Tyrosine	R-HSA-194315 Signaling by Rho GTPases
O76070	6623	uniprot	H. sapiens	6623	H. sapiens	0	0	0	0	0
P38646	3313	uniprot	H. sapiens	3313	H. sapiens	0	1	0	0	0
Q9UDY4	11080	uniprot	H. sapiens	11080	H. sapiens	0	0	0	0	0
P30101	2923	uniprot	H. sapiens	2923	H. sapiens	0	0	0	0	0
Q9H5Q4	64216	uniprot	H. sapiens	64216	H. sapiens	0	0	0	0	0
P07954	2271	uniprot	H. sapiens	2271	H. sapiens	0	0	0	0	0
P61812	7042	uniprot	H. sapiens	7042	H. sapiens	1	0	0	0	0
Q14289	2185	uniprot	H. sapiens	2185	H. sapiens	0	1	0	1	1
Q14192	2274	uniprot	H. sapiens	2274	H. sapiens	0	0	1	0	0
P04062	2629	uniprot	H. sapiens	2629	H. sapiens	0	0	1	0	0
Q8IV08	23646	uniprot	H. sapiens	23646	H. sapiens	0	0	1	0	0
P40306	5699	uniprot	H. sapiens	5699	H. sapiens	0	0	0	0	0
Q96CM8	80221	uniprot	H. sapiens	80221	H. sapiens	0	0	1	0	0
Q96CS3	23197	uniprot	H. sapiens	23197	H. sapiens	0	0	0	0	1
O76003	10539	uniprot	H. sapiens	10539	H. sapiens	0	0	0	0	0
P19525	5610	uniprot	H. sapiens	5610	H. sapiens	0	1	0	0	0
Q9C0C2	85456	uniprot	H. sapiens	85456	H. sapiens	0	0	0	0	0
Q92542	23385	uniprot	H. sapiens	23385	H. sapiens	1	0	0	1	0
P52630	6773	uniprot	H. sapiens	6773	H. sapiens	0	1	0	0	0
Q8IZW8	84951	uniprot	H. sapiens	84951	H. sapiens	0	0	0	1	0
O60568	8985	uniprot	H. sapiens	8985	H. sapiens	1	0	0	0	0
P35580	4628	uniprot	H. sapiens	4628	H. sapiens	0	0	0	0	1

## Sheet: Supplementary Table 3B
Supplementary table 3B. Enriched Reactome terms and functional clustering for selected overrepresented proteins. This table lists all significantly enriched terms, their associated cluster group ID, and the representative term summarizing each functional cluster. Session id: tnyb2jxgl (data: 19/06/2025)
GroupID	Category	Term	Description	LogP	Log(q-value)	Genes	Symbols	InTerm_InList
1_Summary	Reactome Gene Sets	R-HSA-1474244	Extracellular matrix organization	-2.97139	0	7042,8985,23385	TGFB2,PLOD3,NCSTN	3/-
1_Member	Reactome Gene Sets	R-HSA-1474244	Extracellular matrix organization	-2.97139	0	7042,8985,23385	TGFB2,PLOD3,NCSTN	3/281
2_Summary	Reactome Gene Sets	R-HSA-1280215	Cytokine Signaling in Immune system	-2.9442	0	2185,3313,5610,6773	PTK2B,HSPA9,EIF2AK2,STAT2	4/-
2_Member	Reactome Gene Sets	R-HSA-1280215	Cytokine Signaling in Immune system	-2.9442	0	2185,3313,5610,6773	PTK2B,HSPA9,EIF2AK2,STAT2	4/651
2_Member	Reactome Gene Sets	R-HSA-449147	Signaling by Interleukins	-2.59392	0	2185,3313,6773	PTK2B,HSPA9,STAT2	3/381
3_Summary	Reactome Gene Sets	R-HSA-556833	Metabolism of lipids	-2.84868	0	2274,2629,23646,80221	FHL2,GBA1,PLD3,ACSF2	4/-
3_Member	Reactome Gene Sets	R-HSA-556833	Metabolism of lipids	-2.84868	0	2274,2629,23646,80221	FHL2,GBA1,PLD3,ACSF2	4/691
4_Summary	Reactome Gene Sets	R-HSA-9006934	Signaling by Receptor Tyrosine Kinases	-2.43742	0	2185,23385,84951	PTK2B,NCSTN,TNS4	3/-
4_Member	Reactome Gene Sets	R-HSA-9006934	Signaling by Receptor Tyrosine Kinases	-2.43742	0	2185,23385,84951	PTK2B,NCSTN,TNS4	3/433
5_Summary	Reactome Gene Sets	R-HSA-194315	Signaling by Rho GTPases	-2.0358	0	2185,4628,23197	PTK2B,MYH10,FAF2	3/-
5_Member	Reactome Gene Sets	R-HSA-194315	Signaling by Rho GTPases	-2.0358	0	2185,4628,23197	PTK2B,MYH10,FAF2	3/605
5_Member	Reactome Gene Sets	R-HSA-9716542	Signaling by Rho GTPases, Miro GTPases and RHOBTB3	-2.0088	0	2185,4628,23197	PTK2B,MYH10,FAF2	3/619

## Sheet: Supplementary Table 3C
Supplementary Table 3C. Hierarchical classification of KEGG BRITE categories assigned to each underrepresented orthologous protein. The classification is organized by levels (Level 1 to Level 4) according to KEGG Brite ontology.
Uniprot HSA	UniProt CLF	Gene	KO_Id	Level 1	Level 2	Level 3	Level 4
O76070	A0A8C0LYY3	SNCG	K24202	Brite Hierarchies	Protein families: signaling and cellular processes	Transporters	Pores ion channels
P38646	A0A8C0MCJ9	HSPA9	K04043	Genetic Information Processing	Folding, sorting and degradation	RNA degradation
				Brite Hierarchies	Protein families: genetic information processing	Messenger RNA biogenesis	HSP70 / DNAK
				Brite Hierarchies	Protein families: genetic information processing	Chaperones and folding catalysts	MMC/PAM proteins
				Brite Hierarchies	Protein families: genetic information processing	Mitochondrial biogenesis	Proteins involved in Fe-S cluster biogenesis
				Brite Hierarchies	Protein families: signaling and cellular processes	Exosome	Exosomal proteins of haemopoietic cells; Exosomal proteins of breast cancer cells; Exosomal proteins of colorectal cancer cells
Q9UDY4	A0A8C0MRF1	DNAJB4	K09510	Brite Hierarchies	Protein families: genetic information processing	Chaperones and folding catalysts	HSP40 / DNAJ
P30101	A0A8C0NPX9	PDIA3	K08056	Genetic Information Processing	Folding, sorting and degradation	Protein processing in endoplasmic reticulum
				Brite Hierarchies	Protein families: genetic information processing	Chaperones and folding catalysts	Protein disulfide isomerase
				Brite Hierarchies	Protein families: genetic information processing	Membrane trafficking	Endoplasmic reticulum (ER) - Golgi transport
				Brite Hierarchies	Protein families: signaling and cellular processes	Exosome	Exosomal proteins of breast cancer cells
Q9H5Q4	A0A8C0NUL5	TFB2M	K17653	Brite Hierarchies	Protein families: genetic information processing	Mitochondrial biogenesis	Mitochondrial transcription factors
P07954	A0A8C0NZZ1	FH	K01679	Metabolism	Carbohydrate metabolism	Citrate cycle (TCA cycle)
				Metabolism	Carbohydrate metabolism	Pyruvate metabolism
				Human Diseases	Cancer: overview	Pathways in cancer
P61812	A0A8C0P803	TGFB2	K13376	Environmental Information Processing	Signal transduction	MAPK signaling pathway
				Environmental Information Processing	Signal transduction	TGF-beta signaling pathway
				Environmental Information Processing	Signal transduction	FoxO signaling pathway
				Environmental Information Processing	Signaling molecules and interaction	Cytokine-cytokine receptor interaction
				Cellular Processes	Cell growth and death	Cell cycle; Cellular Senescence
				Human Diseases	Cancer: specific types	Colorectal, Pancreatic, Hepatocellular, Renal, Crhonic myeloid leukemia
				Brite Hierarchies	Protein families: signaling and cellular processes	Cytokines and neuropeptides	Transforming growth factors (RSTK binding)
				Brite Hierarchies	Protein families: signaling and cellular processes	Glycosaminoglycan binding proteins	Growth factors/receptors
Q14289	A0A8C0P9E2	PTK2B	K05871	Environmental Information Processing	Signal transduction	Calcium signaling pathway
				Environmental Information Processing	Signal transduction	Phospholipase D signaling pathway
				Brite Hierarchies	Protein families: metabolism	Protein kinases	FAK family (Non-receptor tyrosine kinases)
Q14192	A0A8C0PHY3	FHL2	K14380	Cellular Processes	Cell motility	Cytoskeleton in muscle cells
				Organismal System	Development and regeneration	Osteoclast differentiation
				Brite Hierarchies	Protein families: signaling and cellular processes	Domain-containing proteins not elsewhere classified	FHL family proteins (LIM domain-containing proteins)
P04062	A0A8C0PPX6	GBA1	K01201	Metabolism	Lipid metabolism	Sphingolipid metabolism
				Metabolism	Glycan biosynthesis and metabolism	Other glycan degradation
				Cellular Processes	Transport and catabolism	Lysosome
Q8IV08	A0A8C0SB92	PLD3	K16860	Metabolism	Lipid metabolism	Glycerophospholipid metabolism
				Metabolism	Lipid metabolism	Ether lipid metabolism
				Brite Hierarchies	Protein families: genetic information processing	Membrane trafficking	Exocytosis
P40306	A0A8C0SLB3	PSMB10	K02733	Genetic Information Processing	Folding, sorting and degradation	Proteasome
				Brite Hierarchies	Protein families: metabolism	Peptidases and inhibitors	Family T1: proteasome family
				Brite Hierarchies	Protein families: genetic information processing	Proteasome	beta type subunits
Q96CM8	A0A8C0SM51	ACSF2/CACNA1G	K23617	Brite Hierarchies	Protein families: metabolism	Lipid biosynthesis proteins	Short/medium chain acyl-CoA ligase
Q96CS3	A0A8C0SX57	FAF2	K18726	Brite Hierarchies	Protein families: genetic information processing	Messenger RNA biogenesis	Ran-mediated transport factors
O76003	A0A8C0TKL9	GLRX3	hsa: 10539
P19525	A0A8C0TR41	EIF2AK2	K16195	Cellular Processes	Cell growth and death	Necroptosis
				Human Diseases	Cancer: overview	Viral carcinogenesis
				Brite Hierarchies	Protein families: metabolism	Protein kinases	PEK family [OT]
				Brite Hierarchies	Protein families: metabolism	Protein phosphatases and associated proteins	PP1-interacting proteins (PIPs)
				Brite Hierarchies	Protein families: genetic information processing	Messenger RNA biogenesis	P-body specific factors
Q9C0C2	A0A8I3S5F5	TNKS1BP1	hsa: 85456
Q92542	A0A8C0NP49	NCSTN	K06171	Environmental Information Processing	Signal transduction	Notch signaling pathway
P52630	A0A8C0NJG0	STAT2	K11221	Environmental Information Processing	Signal transduction	JAK-STAT signaling pathway
				Cellular Processes	Cell growth and death	Necroptosis
				Brite Hierarchies	Protein families: genetic information processing	Transcription factors	beta-Scaffold factors with minor groove contacts
Q8IZW8	A0A8C0NIU9	TNS4	K18080	Brite Hierarchies	Protein families: metabolism	Protein phosphatases and associated proteins	Phosphatase and Tensin homologs (PTEN)
O60568	A0A8C0MBD9	PLOD3	K13646	Metabolism	Amino acid metabolism	Lysine degradation
				Metabolism	Glycan biosynthesis and metabolism	Other types of O-glycan biosynthesis
				Metabolism	Brite Hierarchies	Protein families: metabolism
P35580	A0A8C0LWF8	MYH10	K10352	Cellular Processes	Cellular community - eukaryotes	Tight junction
				Cellular Processes	Cell motility	Motor proteins
				Cellular Processes	Cell motility	Cytoskeleton in muscle cells
				Cellular Processes	Cell motility	Regulation of actin cytoskeleton
				Brite Hierarchies	Protein families: signaling and cellular processes	Cytoskeleton proteins	Actin-binding proteins
				Brite Hierarchies	Protein families: signaling and cellular processes	Cytoskeleton proteins	Actin-binding proteins
				Brite Hierarchies	Protein families: signaling and cellular processes	Exosome	Exosomal proteins of bladder cancer cells
