# Supplementary material for: Comparative proteomic analysis in human and canine breast cancer cell line: identification of proteins linked to lipid dynamics and functions
Source: Research Square preprint supplement (doi:10.21203/rs.3.rs-8132817/v1), 2025-12-04
Supplement: Supplementary file 3 [file a9c173584abb0a1c0dd792f4.xlsx]

## Sheet: Supplementary Table 4 A
Supplementary Table 4A. Orthologous proteins overrepresented by at least 30% (Log₂FC ≥ 0.378) in all triple-negative tumor cell lines ( ajdusted p valur < 0.05) compared to the 184B5 control line, with. CLF: Canis lupus familiaris. HSA: Homo sapiens. * adj p value < 0.05, ** adj p value < 0.01, *** adj p value < 0.001.
Uniprot CLF	Uniprot HSA	Gene CLF	Gene HSA	Protein Name (CLF)	Protein Name (HSA)	MCF-7 Log2FC	MDA-MB-231 Log2FC	CMT-U27 Log2FC	IPC-366 Log2FC
A0A8C0M352	Q14974	KPNB1		Karyopherin subunit beta 1	Importin subunit beta-1	-0.176	0.515***	2.985***	2.817***
A0A8C0M836	Q14004	CDK13		Cyclin dependent kinase 13	Cyclin-dependent kinase 13	0.457	1.067*	2.367***	2.305***
A0A8C0MBF4	Q13895	BYSL		Bystin like	Bystin	0.066	1.044***	2.482***	3.864***
A0A8C0MEZ1	Q9Y3E5	PTRH2		peptidyl-tRNA hydrolase	Peptidyl-tRNA hydrolase 2, mitochondrial	0.674	0.991*	4.886***	4.377***
A0A8C0MJY7	Q5SRE5	NUP188		Nucleoporin NUP188		0.134	0.696***	3.122***	2.716***
A0A8C0MK47	Q5SY16	NOL9		Polyribonucleotide 5'-hydroxyl-kinase Clp1 P-loop domain-containing protein	Polynucleotide 5'-hydroxyl-kinase NOL9	-0.177	0.393*	2.538***	2.479***
A0A8C0MPZ5	O43818	RRP9		Ribosomal RNA processing 9, U3 small nucleolar RNA binding protein	U3 small nucleolar RNA-interacting protein 2	-0.56***	0.551***	3.215***	3.248***
A0A8C0MQZ1	Q9UM13	ANAPC10		Anaphase-promoting complex subunit 10		0.729	1.427***	1.248***	2.025***
A0A8C0MTT5	Q01804	OTUD4		ubiquitinyl hydrolase 1	OTU domain-containing protein 4	-0.361	0.813***	1.598***	2.602***
A0A8C0MXD8	Q8NE86	MCU		Calcium uniporter protein	Calcium uniporter protein, mitochondrial	0.742	1.027**	5.17***	5.471***
A0A8C0MXK7	P15927	RPA2		Replication factor A protein 2	Replication protein A 32 kDa subunit	0.569	2.208***	5.53***	5.114***
A0A8C0MY56	Q9H488		POFUT1	GDP-fucose protein O-fucosyltransferase 1		-2.263***	0.674***	1.567***	1.14***
A0A8C0N583	Q15050	RRS1		Ribosome biogenesis regulatory protein	Ribosome biogenesis regulatory protein homolog	0.344	0.574**	3.191***	3.905***
A0A8C0N5N6	Q04206	RELA		RELA proto-onco, NF-kB subunit	Transcription factor p65	0.26*	0.492***	1.922***	1.897***
A0A8C0N5Q9	Q01658	DR1		Protein Dr1		-0.121	0.976***	3.064***	2.621***
A0A8C0N8N8	P00568	AK1		Adenylate kinase isoenzyme 1		-0.096	0.774***	2.017***	1.085***
A0A8C0NAE1	P35754	GLRX		Glutaredoxin-1		-2.017***	2.066***	3.759***	4.032***
A0A8C0ND18	Q9NWT1	PAK1IP1		PAK1 interacting protein 1	p21-activated protein kinase-interacting protein 1	0.699	1.127**	4.424***	5.02***
A0A8C0NEW7	Q14738	PPP2R5D		Serine/threonine-protein phosphatase 2A 56 kDa regulatory subunit	Serine/threonine-protein phosphatase 2A 56 kDa regulatory subunit delta isoform	0.722	2.189***	4.931***	5.937***
A0A8C0NGZ0	Q9BWM7	SFXN3		Sidoreflexin	Sideroflexin-3	-1.701***	1.31***	1.142***	2.011***
A0A8C0NHF8	O43615	TIMM44		Mitochondrial import inner membrane translocase subunit TIM44		-0.016	0.834***	2.605***	2.311***
A0A8C0NHT7	P60842	EIF4A1		Eukaryotic initiation factor 4A-I		-0.04	0.46**	0.451*	1.992***
A0A8C0NPJ4	Q9NNW5	WDR6		tRNA (34-2'-O)-methyltransferase regulator WDR6		-0.204	1.516**	1.703***	1.432**
A0A8C0NV97	Q9ULW3		ABT1	Activator of basal transcription 1		0.202	1.198***	3.086***	2.618***
A0A8C0NWE7	O75940	SMNDC1		Survival of motor neuron-related-splicing factor 30		0.362*	0.952***	2.001***	2.056***
A0A8C0NX49	O00541	PES1		Pescadillo homolog		0.038	0.809***	2.848***	3.156***
A0A8C0NYE4	Q16740	CLPP		ATP-dependent Clp protease proteolytic subunit	ATP-dependent Clp protease proteolytic subunit, mitochondrial	0.078	0.431**	1.645***	1.681***
A0A8C0NYH7	Q92979	EMG1		EMG1 N1-specific pseudouridine methyltransferase	Ribosomal RNA small subunit methyltransferase NEP1	-0.369*	0.43**	2.38***	2.967***
A0A8C0P2T5	P30040	ERP29		Endoplasmic reticulum resident protein 29		-0.016	0.739**	2.805***	1.75***
A0A8C0PDE6	Q13242	SRSF9		RRM domain-containing protein	Serine/arginine-rich splicing factor 9	0.219*	0.423**	2.685***	3.486***
A0A8C0PKV5	Q8IZ73	RPUSD2		RNA pseudouridine synthase domain containing 2	Pseudouridylate synthase RPUSD2	-0.671	0.545*	3.12***	2.693***
A0A8C0PKY3	P52815	MRPL12		Mitochondrial ribosomal protein L12	Large ribosomal subunit protein bL12m	0.192	0.443***	3.346***	2.527***
A0A8C0PM69	P10155	RO60		Ro60, Y RNA binding protein	RNA-binding protein RO60	0.587	0.578*	0.62*	1.47*
A0A8C0PPG2	Q13867	BLMH		Bleomycin hydrolase		-0.862***	1.053***	5.359***	4.435***
A0A8C0PRW0	Q96G03	PGM2		Phosphoglucomutase 2	Phosphopentomutase	-0.49***	0.878***	0.432***	0.517***
A0A8C0PXH8	Q13426	XRCC4		X-ray repair cross complementing 4	DNA repair protein XRCC4	0.255	0.844**	2.432***	1.988***
A0A8C0PXV1	Q9Y266	NUDC		Nuclear migration protein nudC		0.012	0.815**	3.963***	3.987***
A0A8C0Q768	Q96MX6	DNAAF10		Nuclear nucleic acid-binding protein C1D	Dynein axonemal assembly factor 10	-0.057	1.141***	0.987***	1.377***
A0A8C0QA67	O00303	EIF3F		Eukaryotic translation initiation factor 3 subunit F		-0.238**	1.13***	3.162***	3.518***
A0A8C0QD92	P48637	GSS		Glutathione synthetase		0.373*	0.895***	1.449***	1.07***
A0A8C0R9T4	Q9Y5J7	TIMM9		Mitochondrial import inner membrane translocase subunit	Mitochondrial import inner membrane translocase subunit Tim9	0.088	0.577***	0.933***	1.673***
A0A8C0RE17	Q9BU89	DOHH		Deoxyhypusine hydroxylase		-1.115***	0.404*	0.624***	1.566***
A0A8C0RHA9	Q9H5V8	CDCP1		CUB domain containing protein 1	CUB domain-containing protein 1	-3.052***	1.928***	3.421***	3.881***
A0A8C0RI14	Q00059	TFAM		Transcription factor A, mitochondrial		0.085	0.485*	2.291***	1.953***
A0A8C0RSM9	Q14152	EIF3A		Eukaryotic translation initiation factor 3 subunit A		-0.113	1.278***	9.216***	9.137***
A0A8C0RWH2	Q9NZ32	ACTR10		Actin-related protein 10		1.213	1.202*	6.581***	6.981***
A0A8C0SKF2	Q8WUA2	PPIL4		Peptidyl-prolyl cis-trans isomerase	Peptidyl-prolyl cis-trans isomerase-like 4	0.247	0.901***	4.103***	4.442***
A0A8C0SMH6	Q8NFH3	NUP43		Nucleoporin 43	Nucleoporin Nup43	-0.348	1.033***	4.703***	4.784***
A0A8C0SMR0	P62072	TIMM10		Mitochondrial import inner membrane translocase subunit	Mitochondrial import inner membrane translocase subunit Tim10	0.148	0.57**	2.529***	3.239***
A0A8C0SN10	P00387	CYB5R3		NADH-cytochrome b5 reductase	NADH-cytochrome b5 reductase 3	-0.625**	0.827***	3.907***	4.062***
A0A8C0SWZ8	P40855	PEX19		Peroxisomal biogenesis factor 19		0.39	1.241***	3.061***	3.442***
A0A8C0T3T7	O75477	ERLIN1		Erlin	Erlin-1	-1.503***	1.105***	2.878***	2.419***
A0A8C0T752	Q9Y3D0	CIAO2B		Cytosolic iron-sulfur assembly component 2B		0.194	0.883***	1.941***	2.063***
A0A8C0T995	Q16543	CDC37		Hsp90 co-chaperone Cdc37		0.291***	1.001***	3.315***	3.129***
A0A8C0TA97	Q00534	CDK6		Cyclin-dependent kinase 6		-3.455***	1.101***	2.74***	3.488***
A0A8C0TBA8	P09001	MRPL3		Large ribosomal subunit protein uL3m		0.342*	0.399*	1.917***	2.287***
A0A8C0TC90	Q9BPX5	ARPC5L		Actin-related protein 2/3 complex subunit 5	Actin-related protein 2/3 complex subunit 5-like protein	0.485	1.011***	1.555***	2.462***
A0A8C0TCN1	Q6UXN9	WDR82		WD repeat domain 82	WD repeat-containing protein 82	0.13	0.62***	3.425***	3.263***
A0A8C0TDT4	P62277	RPS13		Small ribosomal subunit protein uS15		-0.414**	0.423*	2.262***	2.631***
A0A8C0TIJ9	P48643	CCT5		T-complex protein 1 subunit epsilon		0.157	0.47***	2.322***	2.266***
A0A8C0TJP4	O00487	PSMD14		Proteasome 26S subunit, non-ATPase 14	26S proteasome non-ATPase regulatory subunit 14	-0.147*	0.648***	1.088***	0.687***
A0A8C0Z0Q7	Q9BZX2	UCK2		Uridine-cytidine kinase	Uridine-cytidine kinase 2	0.293	1.389***	4.509***	5.804***
A0A8C0Z183	Q6RFH5	WDR74		WD repeat domain 74	WD repeat-containing protein 74	-0.55	0.637**	1.916***	0.554*
A0A8C0Z207	Q12996	CSTF3		Cleavage stimulation factor subunit 3		-0.165	0.54***	2.502***	2.718***
A0A8C0Z3I3	P12268	IMPDH2		Inosine-5'-monophosphate dehydrogenase	Inosine-5'-monophosphate dehydrogenase 2	-0.088	1.063***	1.702***	1.839***
A0A8C0Z6N5	Q6NZY4	ZCCHC8		Zinc finger CCHC domain-containing protein 8		0.198	1.213***	4.247***	3.603***
A0A8I3P3A3	P30566	ADSL		Adenylosuccinate lyase		-0.384	1.417***	1.71***	2.463***
A0A8C0MDI5	Q6IQ22	RAB12		Ras-related protein Rab-12		-0.305*	0.537**	0.38*	1.136***
A0A8C0NSG7	Q86V81	ALYREF		Aly/REF export factor	THO complex subunit 4	0.102	0.713***	1.66***	2.044***
A0A8C0Z2S0	Q9BTE6		AARSD1	Alanyl-tRNA editing protein Aarsd1		0.538	2.074***	6.82***	6.285***
A0A8C0MIM7	Q9P1Y6	PHRF1		PHD and ring finger domains 1	PHD and RING finger domain-containing protein 1	-1.081*	1.019***	2.563***	1.227**
A0A8C0NB60	Q8IXK0	PHC2		Polyhomeotic homolog 2	Polyhomeotic-like protein 2	0.391	1.73***	3.723***	5.851***
A0A8C0NZE2	Q96GA3	LTV1		Protein LTV1 homolog		0.284	1.258***	3.138***	4.362***
A0A8C0PJJ6	P49593	PPM1F		PPM-type phosphatase domain-containing protein	Protein phosphatase 1F	-3.127***	0.611***	0.48***	1.644***
A0A8C0QBL1	Q9NQZ2	UTP3		UTP3 small subunit processome component	Something about silencing protein 10	0.312	0.495*	2.971***	3.828***
A0A8C0MZ51	Q7Z422	SZRD1		SUZ RNA-binding domain-containing	SUZ domain-containing protein 1	0.321	1.126***	1.377***	2.176***
A0A8C0RTV1	Q8WYA6	CTNNBL1		Beta-catenin-like protein 1 N-terminal domain-containing protein	Beta-catenin-like protein 1	0.25	0.503**	0.943***	1.649***
A0A8C0PLW8	P62424	RPL7A		60S ribosomal protein L7a	Large ribosomal subunit protein eL8	-0.079	0.66**	1.269***	1.669***
A0A8C0MNM4	Q9NPF4	OSGEP		N(6)-L-threonylcarbamoyladenine synthase	tRNA N6-adenosine threonylcarbamoyltransferase	-0.056	0.446***	1.082***	0.642***
A0A8C0RN05	Q7L5N1	COPS6		COP9 signalosome complex subunit 6		0.341*	0.485**	3.305***	2.68***
A0A8C0TJE0	Q9Y6K9	IKBKG		NF-kappa-B essential modulator		-0.249	0.393**	1.7***	0.831***

## Sheet: Supplementary Table 4 B
Supplementary Table 4B. Orthologous proteins underrepresented by at least 30% (Log₂FC ≤ –0.514) in all triple-negative tumor cell lines and MCF-7 compared to the 184B5 control line, with ajdusted p valur < 0.05. CLF: Canis lupus familiaris. HSA: Homo sapiens.
Uniprot CLF	Uniprot HSA	Gene CLF	Gene HSA	Protein Name (CLF)	Protein Name (HSA)	MCF-7 Log2FC	MDA-MB-231 Log2FC	CMT-U27 Log2FC	IPC-366 Log2FC
A0A8C0LWR4	Q96N66	MBOAT7		Lysophospholipid acyltransferase 7		-0.035	-1.081***	-2.446***	-1.92***
A0A8C0MQB1	P46976	GYG1		glycogenin glucosyltransferase	Glycogenin-1	-0.318	-0.656**	-0.814**	-0.736***
A0A8C0P2W0	Q9Y6E2		BZW2	eIF5-mimic protein 1		0.504**	-1.097***	-1.5***	-2.194***
A0A8C0PRU0	Q9P258	RCC2		Regulator of chromosome condensation 2	Protein RCC2	0.345***	-0.682***	-3.033***	-3.283***
A0A8C0Q4T7	O75390	CS		Citrate synthase	Citrate synthase, mitochondrial	0.211**	-0.713***	-1.911***	-0.838***
A0A8C0QFQ6	P12004	PCNA		Proliferating cell nuclear antigen		-0.336	-0.693**	-2.353***	-2.609***
A0A8C0RIZ9	P15586	GNS		N-acetylglucosamine-6-sulfatase		0.112	-0.664***	-0.777***	-1.181***
A0A8C0RJF2	Q96A33	CCDC47		PAT complex subunit CCDC47		0.29*	-0.813***	-2.31***	-2.458***
A0A8C0RLR6	P49755	TMED10		Transmembrane emp24 domain-containing protein 10		-0.128	-0.58***	-1.383***	-1.293***
A0A8C0RYN1	Q9Y2V2	CARHSP1		CSD domain-containing protein	Calcium-regulated heat-stable protein 1	0.756***	-0.6***	-4.685***	-0.865***
A0A8C0T8M3	Q32P44	EML3		EMAP like 3	Echinoderm microtubule-associated protein-like 3	-0.186	-0.634*	-2.204**	-2.382***
A0A8C0TDV4	P53582	METAP1		Methionine aminopeptidase	Methionine aminopeptidase 1	-0.308**	-0.875***	-6.047***	-4.469***
A0A8C0TIF6	Q96RQ3	MCCC1		Methylcrotonyl-CoA carboxylase subunit 1	Methylcrotonoyl-CoA carboxylase subunit alpha, mitochondrial	0.321**	-1.575***	-3.356***	-5.079***
A0A8C0TKS7	O00115	DNASE2		Deoxyribonuclease-2-alpha		0.946***	-1.509***	-5.94***	-0.718***
A0A8I3S0W9	Q9Y5Y2	NUBP2		Cytosolic Fe-S cluster assembly factor NUBP2		0.181	-0.616***	-1.314***	-1.528***
A0A8C0P1Q1	O14545	TRAFD1		TRAF-type zinc finger domain-containing protein 1		0.57***	-1.675***	-3.075***	-1.373***
A0A8C0M3P6	Q9H9B4	SFXN1		Sidoreflexin	Sideroflexin-1	0.468***	-0.916***	-3.165***	-3.994***
A0A8C0PY46	Q9UL46	PSME2		Proteasome activator complex subunit 2		-0.33**	-1.37***	-3.778***	-4.802***
A0A8C0QGC6	Q96LJ7	DHRS1		Dehydrogenase/reductase 1	Dehydrogenase/reductase SDR family member 1	0.162	-1.123**	-1.026***	-4.08***

## Sheet: Supplementary Table 4 C
Supplementary Table 4 C. Gene annotation and binary enrichment results for selected overrepresented proteins in TNBC cell line using the Reactome database. Includes Uniprot identifier, functional annotations, term memberships and binary values (1/0) indicating presence within enriched Reactome terms. Session id: t_xoii_ai (data: 02/07/2025)
MyList	Gene ID	Type	Tax ID	Homologene Gene ID	Homologene Gene Tax ID	R-HSA-8953854 Metabolism of RNA	R-HSA-72203 Processing of Capped Intron-Co	R-HSA-9837999 Mitochondrial protein degradat	R-HSA-15869 Metabolism of nucleotides	R-HSA-156827 L13a-mediated translational si	R-HSA-68882 Mitotic Anaphase	R-HSA-6798695 Neutrophil degranulation	R-HSA-382556 ABC-family proteins mediated t	R-HSA-69239 Synthesis of DNA
Q14974	3837	uniprot	H. sapiens	3837	H. sapiens	0	0	0	0	0	0	0	0	0
Q14004	8621	uniprot	H. sapiens	8621	H. sapiens	0	0	0	0	0	0	1	0	0
Q13895	705	uniprot	H. sapiens	705	H. sapiens	1	0	0	0	0	0	0	0	0
Q9Y3E5	51651	uniprot	H. sapiens	51651	H. sapiens	0	0	0	0	0	0	0	0	0
Q5SRE5	23511	uniprot	H. sapiens	23511	H. sapiens	1	1	0	0	0	1	0	0	0
Q5SY16	79707	uniprot	H. sapiens	79707	H. sapiens	1	0	0	0	0	0	0	0	0
O43818	9136	uniprot	H. sapiens	9136	H. sapiens	1	0	0	0	0	0	0	0	0
Q9UM13	10393	uniprot	H. sapiens	10393	H. sapiens	0	0	0	0	0	1	0	0	1
Q01804	54726	uniprot	H. sapiens	54726	H. sapiens	0	0	0	0	0	0	0	0	0
Q8NE86	90550	uniprot	H. sapiens	90550	H. sapiens	0	0	0	0	0	0	0	0	0
P15927	6118	uniprot	H. sapiens	6118	H. sapiens	0	0	0	0	0	1	0	0	1
Q9H488	23509	uniprot	H. sapiens	23509	H. sapiens	0	0	0	0	0	0	0	0	0
Q15050	23212	uniprot	H. sapiens	23212	H. sapiens	0	0	0	0	0	0	0	0	0
Q04206	5970	uniprot	H. sapiens	5970	H. sapiens	0	0	0	0	0	0	0	0	0
Q01658	1810	uniprot	H. sapiens	1810	H. sapiens	0	0	0	0	0	0	0	0	0
P00568	203	uniprot	H. sapiens	203	H. sapiens	0	0	0	1	0	0	0	0	0
P35754	2745	uniprot	H. sapiens	2745	H. sapiens	0	0	0	1	0	0	0	0	0
Q9NWT1	55003	uniprot	H. sapiens	55003	H. sapiens	0	0	0	0	0	0	0	0	0
Q14738	5528	uniprot	H. sapiens	5528	H. sapiens	0	0	0	0	0	1	0	0	1
Q9BWM7	81855	uniprot	H. sapiens	81855	H. sapiens	0	0	0	0	0	0	0	0	0
O43615	10469	uniprot	H. sapiens	10469	H. sapiens	0	0	1	0	0	0	0	0	0
P60842	1973	uniprot	H. sapiens	1973	H. sapiens	1	0	0	0	1	1	0	0	0
Q9NNW5	11180	uniprot	H. sapiens	11180	H. sapiens	0	0	0	0	0	0	0	0	0
Q9ULW3	29777	uniprot	H. sapiens	29777	H. sapiens	0	0	0	0	0	0	0	0	0
O75940	10285	uniprot	H. sapiens	10285	H. sapiens	1	1	0	0	0	0	0	0	0
O00541	23481	uniprot	H. sapiens	23481	H. sapiens	1	0	0	0	0	0	0	0	0
Q16740	8192	uniprot	H. sapiens	8192	H. sapiens	0	0	1	0	0	0	0	0	0
Q92979	10436	uniprot	H. sapiens	10436	H. sapiens	1	0	0	0	0	0	0	0	0
P30040	10961	uniprot	H. sapiens	10961	H. sapiens	0	0	0	0	0	0	0	0	0
Q13242	8683	uniprot	H. sapiens	8683	H. sapiens	1	1	0	0	0	1	0	0	0
Q8IZ73	27079	uniprot	H. sapiens	27079	H. sapiens	0	0	0	0	0	0	0	0	0
P52815	6182	uniprot	H. sapiens	6182	H. sapiens	0	0	1	0	1	0	0	0	0
P10155	6738	uniprot	H. sapiens	6738	H. sapiens	0	0	0	0	0	0	0	0	0
Q13867	642	uniprot	H. sapiens	642	H. sapiens	0	0	0	0	0	0	0	0	1
Q96G03	55276	uniprot	H. sapiens	55276	H. sapiens	0	0	0	0	0	1	1	0	0
Q13426	7518	uniprot	H. sapiens	7518	H. sapiens	0	0	0	0	0	0	0	0	0
Q9Y266	10726	uniprot	H. sapiens	10726	H. sapiens	0	0	0	0	0	1	0	0	0
Q96MX6	116143	uniprot	H. sapiens	116143	H. sapiens	0	0	0	0	0	0	0	0	0
O00303	8665	uniprot	H. sapiens	8665	H. sapiens	0	0	0	0	1	0	0	0	0
P48637	2937	uniprot	H. sapiens	2937	H. sapiens	0	0	0	0	0	0	0	0	0
Q9Y5J7	26520	uniprot	H. sapiens	26520	H. sapiens	0	0	1	0	0	0	0	0	0
Q9BU89	83475	uniprot	H. sapiens	83475	H. sapiens	0	0	0	0	0	0	0	0	0
Q9H5V8	64866	uniprot	H. sapiens	64866	H. sapiens	0	0	0	0	0	0	0	0	0
Q00059	7019	uniprot	H. sapiens	7019	H. sapiens	0	0	1	0	0	0	0	0	0
Q14152	8661	uniprot	H. sapiens	8661	H. sapiens	0	0	0	0	1	0	0	0	0
Q9NZ32	55860	uniprot	H. sapiens	55860	H. sapiens	0	0	0	0	0	1	1	0	1
Q8WUA2	85313	uniprot	H. sapiens	85313	H. sapiens	1	1	0	0	0	0	0	0	0
Q8NFH3	348995	uniprot	H. sapiens	348995	H. sapiens	1	1	0	0	0	1	0	0	0
P62072	26519	uniprot	H. sapiens	26519	H. sapiens	0	0	1	0	0	0	0	0	0
P00387	1727	uniprot	H. sapiens	1727	H. sapiens	0	0	0	0	0	0	1	0	0
P40855	5824	uniprot	H. sapiens	5824	H. sapiens	0	0	1	0	0	0	0	1	0
O75477	10613	uniprot	H. sapiens	10613	H. sapiens	0	0	0	0	0	1	0	1	0
Q9Y3D0	51647	uniprot	H. sapiens	51647	H. sapiens	0	0	0	0	0	0	0	0	0
Q16543	11140	uniprot	H. sapiens	11140	H. sapiens	0	0	0	0	0	0	0	0	0
Q00534	1021	uniprot	H. sapiens	1021	H. sapiens	0	0	0	0	0	1	0	0	1
P09001	11222	uniprot	H. sapiens	11222	H. sapiens	0	0	0	0	1	0	0	0	0
Q9BPX5	81873	uniprot	H. sapiens	81873	H. sapiens	0	0	0	0	0	0	0	0	0
Q6UXN9	80335	uniprot	H. sapiens	80335	H. sapiens	0	0	0	0	0	0	0	0	0
P62277	6207	uniprot	H. sapiens	6207	H. sapiens	1	0	0	0	1	1	0	0	0
P48643	22948	uniprot	H. sapiens	22948	H. sapiens	0	0	0	0	0	0	0	0	0
O00487	10213	uniprot	H. sapiens	10213	H. sapiens	1	0	0	0	0	1	1	1	1
Q9BZX2	7371	uniprot	H. sapiens	7371	H. sapiens	0	0	0	1	0	0	0	0	0
Q6RFH5	54663	uniprot	H. sapiens	54663	H. sapiens	0	0	0	0	0	0	0	0	0
Q12996	1479	uniprot	H. sapiens	1479	H. sapiens	1	1	0	0	0	0	0	0	0
P12268	3615	uniprot	H. sapiens	3615	H. sapiens	0	0	0	1	0	1	1	0	0
Q6NZY4	55596	uniprot	H. sapiens	55596	H. sapiens	0	0	0	0	0	0	0	0	0
P30566	158	uniprot	H. sapiens	158	H. sapiens	0	0	0	1	0	0	0	0	0
Q6IQ22	201475	uniprot	H. sapiens	201475	H. sapiens	0	0	0	0	0	0	0	0	0
Q86V81	10189	uniprot	H. sapiens	10189	H. sapiens	1	1	0	0	0	1	0	0	0
Q9BTE6	80755	uniprot	H. sapiens	80755	H. sapiens	0	0	0	0	0	0	0	0	0
Q9P1Y6	57661	uniprot	H. sapiens	57661	H. sapiens	0	0	0	0	0	0	0	0	0
Q8IXK0	1912	uniprot	H. sapiens	1912	H. sapiens	0	0	0	0	0	0	0	0	0
Q96GA3	84946	uniprot	H. sapiens	84946	H. sapiens	1	0	0	0	0	0	0	0	0
P49593	9647	uniprot	H. sapiens	9647	H. sapiens	0	0	0	0	0	0	0	0	0
Q9NQZ2	57050	uniprot	H. sapiens	57050	H. sapiens	1	0	0	0	0	0	0	0	0
Q7Z422	26099	uniprot	H. sapiens	26099	H. sapiens	0	0	0	0	0	0	0	0	0
Q8WYA6	56259	uniprot	H. sapiens	56259	H. sapiens	1	1	0	0	0	0	0	0	0
P62424	6130	uniprot	H. sapiens	6130	H. sapiens	1	0	0	0	1	1	0	0	0
Q9NPF4	55644	uniprot	H. sapiens	55644	H. sapiens	1	0	0	0	0	1	0	0	0
Q7L5N1	10980	uniprot	H. sapiens	10980	H. sapiens	0	0	0	0	0	0	0	0	0
Q9Y6K9	8517	uniprot	H. sapiens	8517	H. sapiens	0	0	0	0	0	1	0	0	1

## Sheet: Supplementary Table 4 D
Supplementary table 4 D. Enriched Reactome terms and functional clustering for selected overrepresented proteins im TNBC cell lines. This table lists all significantly enriched terms, their associated cluster group ID, and the representative term summarizing each functional cluster. Session id: t_xoii_ai (data: 02/07/2025)
GroupID	Category	Term	Description	LogP	Log(q-value)	Genes	Symbols	InTerm_InList
1_Summary	Reactome Gene Sets	R-HSA-8953854	Metabolism of RNA	-15.4268	-12.0054	705,1479,1973,6130,6207,8683,9136,10189,10213,10285,10436,23481,23511,55644,56259,57050,79707,84946,85313,348995	BYSL,CSTF3,EIF4A1,RPL7A,RPS13,SRSF9,RRP9,ALYREF,PSMD14,SMNDC1,EMG1,PES1,NUP188,OSGEP,CTNNBL1,UTP3,NOL9,LTV1,PPIL4,NUP43	20/-
1_Member	Reactome Gene Sets	R-HSA-8953854	Metabolism of RNA	-15.4268	-12.0054	705,1479,1973,6130,6207,8683,9136,10189,10213,10285,10436,23481,23511,55644,56259,57050,79707,84946,85313,348995	BYSL,CSTF3,EIF4A1,RPL7A,RPS13,SRSF9,RRP9,ALYREF,PSMD14,SMNDC1,EMG1,PES1,NUP188,OSGEP,CTNNBL1,UTP3,NOL9,LTV1,PPIL4,NUP43	20/644
1_Member	Reactome Gene Sets	R-HSA-6791226	Major pathway of rRNA processing in the nucleolus and cytosol	-8.82167	-5.70127	705,6130,6207,9136,10436,23481,57050,79707,84946	BYSL,RPL7A,RPS13,RRP9,EMG1,PES1,UTP3,NOL9,LTV1	9/182
1_Member	Reactome Gene Sets	R-HSA-8868773	rRNA processing in the nucleus and cytosol	-8.63723	-5.69291	705,6130,6207,9136,10436,23481,57050,79707,84946	BYSL,RPL7A,RPS13,RRP9,EMG1,PES1,UTP3,NOL9,LTV1	9/191
1_Member	Reactome Gene Sets	R-HSA-72312	rRNA processing	-8.48092	-5.66154	705,6130,6207,9136,10436,23481,57050,79707,84946	BYSL,RPL7A,RPS13,RRP9,EMG1,PES1,UTP3,NOL9,LTV1	9/199
1_Member	Reactome Gene Sets	R-HSA-6790901	rRNA modification in the nucleus and cytosol	-3.26929	-1.46063	9136,10436,57050	RRP9,EMG1,UTP3	3/59
2_Summary	Reactome Gene Sets	R-HSA-72203	Processing of Capped Intron-Containing Pre-mRNA	-6.40688	-3.68441	1479,8683,10189,10285,23511,56259,85313,348995	CSTF3,SRSF9,ALYREF,SMNDC1,NUP188,CTNNBL1,PPIL4,NUP43	8/-
2_Member	Reactome Gene Sets	R-HSA-72203	Processing of Capped Intron-Containing Pre-mRNA	-6.40688	-3.68441	1479,8683,10189,10285,23511,56259,85313,348995	CSTF3,SRSF9,ALYREF,SMNDC1,NUP188,CTNNBL1,PPIL4,NUP43	8/252
2_Member	Reactome Gene Sets	R-HSA-72163	mRNA Splicing - Major Pathway	-3.85931	-1.91499	8683,10189,10285,56259,85313	SRSF9,ALYREF,SMNDC1,CTNNBL1,PPIL4	5/184
2_Member	Reactome Gene Sets	R-HSA-72172	mRNA Splicing	-3.78368	-1.86739	8683,10189,10285,56259,85313	SRSF9,ALYREF,SMNDC1,CTNNBL1,PPIL4	5/191
2_Member	Reactome Gene Sets	R-HSA-72187	mRNA 3'-end processing	-3.50755	-1.63018	1479,8683,10189	CSTF3,SRSF9,ALYREF	3/49
2_Member	Reactome Gene Sets	R-HSA-73856	RNA Polymerase II Transcription Termination	-3.31335	-1.48297	1479,8683,10189	CSTF3,SRSF9,ALYREF	3/57
3_Summary	Reactome Gene Sets	R-HSA-9837999	Mitochondrial protein degradation	-5.30537	-2.70594	6182,7019,8192,26519,26520,10469,5824	MRPL12,TFAM,CLPP,TIMM10,TIMM9,TIMM44,PEX19	7/-
3_Member	Reactome Gene Sets	R-HSA-9837999	Mitochondrial protein degradation	-5.30537	-2.70594	6182,7019,8192,26519,26520	MRPL12,TFAM,CLPP,TIMM10,TIMM9	5/92
3_Member	Reactome Gene Sets	R-HSA-1268020	Mitochondrial protein import	-3.20607	-1.4181	10469,26519,26520	TIMM44,TIMM10,TIMM9	3/62
3_Member	Reactome Gene Sets	R-HSA-9609507	Protein localization	-3.13461	-1.38526	5824,10469,26519,26520	PEX19,TIMM44,TIMM10,TIMM9	4/151
4_Summary	Reactome Gene Sets	R-HSA-15869	Metabolism of nucleotides	-5.28228	-2.70594	158,203,2745,3615,7371	ADSL,AK1,GLRX,IMPDH2,UCK2	5/-
4_Member	Reactome Gene Sets	R-HSA-15869	Metabolism of nucleotides	-5.28228	-2.70594	158,203,2745,3615,7371	ADSL,AK1,GLRX,IMPDH2,UCK2	5/93
5_Summary	Reactome Gene Sets	R-HSA-156827	L13a-mediated translational silencing of Ceruloplasmin expression	-4.98417	-2.61462	1973,6130,6207,8661,8665,6182,11222	EIF4A1,RPL7A,RPS13,EIF3A,EIF3F,MRPL12,MRPL3	7/-
5_Member	Reactome Gene Sets	R-HSA-156827	L13a-mediated translational silencing of Ceruloplasmin expression	-4.98417	-2.61462	1973,6130,6207,8661,8665	EIF4A1,RPL7A,RPS13,EIF3A,EIF3F	5/107
5_Member	Reactome Gene Sets	R-HSA-72766	Translation	-4.98329	-2.61462	1973,6130,6182,6207,8661,8665,11222	EIF4A1,RPL7A,MRPL12,RPS13,EIF3A,EIF3F,MRPL3	7/280
5_Member	Reactome Gene Sets	R-HSA-72706	GTP hydrolysis and joining of the 60S ribosomal subunit	-4.96449	-2.61462	1973,6130,6207,8661,8665	EIF4A1,RPL7A,RPS13,EIF3A,EIF3F	5/108
5_Member	Reactome Gene Sets	R-HSA-72649	Translation initiation complex formation	-4.83568	-2.61462	1973,6207,8661,8665	EIF4A1,RPS13,EIF3A,EIF3F	4/55
5_Member	Reactome Gene Sets	R-HSA-72702	Ribosomal scanning and start codon recognition	-4.83568	-2.61462	1973,6207,8661,8665	EIF4A1,RPS13,EIF3A,EIF3F	4/55
5_Member	Reactome Gene Sets	R-HSA-72613	Eukaryotic Translation Initiation	-4.83194	-2.61462	1973,6130,6207,8661,8665	EIF4A1,RPL7A,RPS13,EIF3A,EIF3F	5/115
5_Member	Reactome Gene Sets	R-HSA-72737	Cap-dependent Translation Initiation	-4.83194	-2.61462	1973,6130,6207,8661,8665	EIF4A1,RPL7A,RPS13,EIF3A,EIF3F	5/115
5_Member	Reactome Gene Sets	R-HSA-72662	Activation of the mRNA upon binding of the cap-binding complex and eIFs, and subsequent binding to 43S	-4.80438	-2.61339	1973,6207,8661,8665	EIF4A1,RPS13,EIF3A,EIF3F	4/56
5_Member	Reactome Gene Sets	R-HSA-72689	Formation of a pool of free 40S subunits	-3.79804	-1.86797	6130,6207,8661,8665	RPL7A,RPS13,EIF3A,EIF3F	4/101
5_Member	Reactome Gene Sets	R-HSA-72695	Formation of the ternary complex, and subsequently, the 43S complex	-3.43105	-1.56725	6207,8661,8665	RPS13,EIF3A,EIF3F	3/52
6_Summary	Reactome Gene Sets	R-HSA-68882	Mitotic Anaphase	-4.95999	-2.61462	5528,10213,10393,10726,23511,348995,8683,10189,1021,6118,6130,6207,8517,55860,1973,10613,3615,55644,55276	PPP2R5D,PSMD14,ANAPC10,NUDC,NUP188,NUP43,SRSF9,ALYREF,CDK6,RPA2,RPL7A,RPS13,IKBKG,ACTR10,EIF4A1,ERLIN1,IMPDH2,OSGEP,PGM2	19/-
6_Member	Reactome Gene Sets	R-HSA-68882	Mitotic Anaphase	-4.95999	-2.61462	5528,10213,10393,10726,23511,348995	PPP2R5D,PSMD14,ANAPC10,NUDC,NUP188,NUP43	6/186
6_Member	Reactome Gene Sets	R-HSA-2555396	Mitotic Metaphase and Anaphase	-4.94675	-2.61462	5528,10213,10393,10726,23511,348995	PPP2R5D,PSMD14,ANAPC10,NUDC,NUP188,NUP43	6/187
6_Member	Reactome Gene Sets	R-HSA-159236	Transport of Mature mRNA derived from an Intron-Containing Transcript	-4.54671	-2.38054	8683,10189,23511,348995	SRSF9,ALYREF,NUP188,NUP43	4/65
6_Member	Reactome Gene Sets	R-HSA-69278	Cell Cycle, Mitotic	-4.38936	-2.26859	1021,5528,6118,10213,10393,10726,23511,348995	CDK6,PPP2R5D,RPA2,PSMD14,ANAPC10,NUDC,NUP188,NUP43	8/475
6_Member	Reactome Gene Sets	R-HSA-72202	Transport of Mature Transcript to Cytoplasm	-4.37117	-2.26859	8683,10189,23511,348995	SRSF9,ALYREF,NUP188,NUP43	4/72
6_Member	Reactome Gene Sets	R-HSA-69620	Cell Cycle Checkpoints	-4.36781	-2.26859	5528,6118,10213,10393,10726,348995	PPP2R5D,RPA2,PSMD14,ANAPC10,NUDC,NUP43	6/237
6_Member	Reactome Gene Sets	R-HSA-8953897	Cellular responses to stimuli	-4.32146	-2.24244	1021,6118,6130,6207,8517,10213,10393,23511,55860,348995	CDK6,RPA2,RPL7A,RPS13,IKBKG,PSMD14,ANAPC10,NUP188,ACTR10,NUP43	10/788
6_Member	Reactome Gene Sets	R-HSA-2467813	Separation of Sister Chromatids	-4.27765	-2.21794	5528,10213,10393,10726,348995	PPP2R5D,PSMD14,ANAPC10,NUDC,NUP43	5/150
6_Member	Reactome Gene Sets	R-HSA-159227	Transport of the SLBP independent Mature mRNA	-4.19343	-2.15221	10189,23511,348995	ALYREF,NUP188,NUP43	3/29
6_Member	Reactome Gene Sets	R-HSA-159230	Transport of the SLBP Dependant Mature mRNA	-4.14851	-2.12501	10189,23511,348995	ALYREF,NUP188,NUP43	3/30
6_Member	Reactome Gene Sets	R-HSA-2262752	Cellular responses to stress	-4.0221	-2.01563	1021,6118,6130,6207,10213,10393,23511,55860,348995	CDK6,RPA2,RPL7A,RPS13,PSMD14,ANAPC10,NUP188,ACTR10,NUP43	9/690
6_Member	Reactome Gene Sets	R-HSA-159231	Transport of Mature mRNA Derived from an Intronless Transcript	-3.94532	-1.96235	10189,23511,348995	ALYREF,NUP188,NUP43	3/35
6_Member	Reactome Gene Sets	R-HSA-69618	Mitotic Spindle Checkpoint	-3.93663	-1.96235	5528,10393,10726,348995	PPP2R5D,ANAPC10,NUDC,NUP43	4/93
6_Member	Reactome Gene Sets	R-HSA-159234	Transport of Mature mRNAs Derived from Intronless Transcripts	-3.90836	-1.94932	10189,23511,348995	ALYREF,NUP188,NUP43	3/36
6_Member	Reactome Gene Sets	R-HSA-1640170	Cell Cycle	-3.76832	-1.8654	1021,5528,6118,10213,10393,10726,23511,348995	CDK6,PPP2R5D,RPA2,PSMD14,ANAPC10,NUDC,NUP188,NUP43	8/584
6_Member	Reactome Gene Sets	R-HSA-1169410	Antiviral mechanism by IFN-stimulated genes	-3.58163	-1.69167	1973,8517,23511,348995	EIF4A1,IKBKG,NUP188,NUP43	4/115
6_Member	Reactome Gene Sets	R-HSA-68886	M Phase	-3.42049	-1.56725	5528,10213,10393,10726,23511,348995	PPP2R5D,PSMD14,ANAPC10,NUDC,NUP188,NUP43	6/354
6_Member	Reactome Gene Sets	R-HSA-168273	Influenza Viral RNA Transcription and Replication	-3.36657	-1.52491	6130,6207,23511,348995	RPL7A,RPS13,NUP188,NUP43	4/131
6_Member	Reactome Gene Sets	R-HSA-1169408	ISG15 antiviral mechanism	-3.29112	-1.47174	1973,23511,348995	EIF4A1,NUP188,NUP43	3/58
6_Member	Reactome Gene Sets	R-HSA-3371453	Regulation of HSF1-mediated heat shock response	-3.22678	-1.42859	6118,23511,348995	RPA2,NUP188,NUP43	3/61
6_Member	Reactome Gene Sets	R-HSA-168255	Influenza Infection	-3.17821	-1.40023	6130,6207,23511,348995	RPL7A,RPS13,NUP188,NUP43	4/147
6_Member	Reactome Gene Sets	R-HSA-70171	Glycolysis	-3.14602	-1.38671	5528,23511,348995	PPP2R5D,NUP188,NUP43	3/65
6_Member	Reactome Gene Sets	R-HSA-5619115	Disorders of transmembrane transporters	-3.14539	-1.38671	10213,10613,23511,348995	PSMD14,ERLIN1,NUP188,NUP43	4/150
6_Member	Reactome Gene Sets	R-HSA-70326	Glucose metabolism	-2.94852	-1.21727	5528,23511,348995	PPP2R5D,NUP188,NUP43	3/76
6_Member	Reactome Gene Sets	R-HSA-3371556	Cellular response to heat stress	-2.91589	-1.19447	6118,23511,348995	RPA2,NUP188,NUP43	3/78
6_Member	Reactome Gene Sets	R-HSA-141424	Amplification of signal from the kinetochores	-2.89991	-1.19447	5528,10726,348995	PPP2R5D,NUDC,NUP43	3/79
6_Member	Reactome Gene Sets	R-HSA-141444	Amplification of signal from unattached kinetochores via a MAD2 inhibitory signal	-2.89991	-1.19447	5528,10726,348995	PPP2R5D,NUDC,NUP43	3/79
6_Member	Reactome Gene Sets	R-HSA-9705683	SARS-CoV-2-host interactions	-2.88787	-1.19071	6207,8517,23511,348995	RPS13,IKBKG,NUP188,NUP43	4/176
6_Member	Reactome Gene Sets	R-HSA-162909	Host Interactions of HIV factors	-2.77935	-1.09827	10213,23511,348995	PSMD14,NUP188,NUP43	3/87
6_Member	Reactome Gene Sets	R-HSA-9679506	SARS-CoV Infections	-2.65558	-0.990019	3615,6207,8517,23511,348995	IMPDH2,RPS13,IKBKG,NUP188,NUP43	5/340
6_Member	Reactome Gene Sets	R-HSA-72306	tRNA processing	-2.61913	-0.968547	23511,55644,348995	NUP188,OSGEP,NUP43	3/99
6_Member	Reactome Gene Sets	R-HSA-9648025	EML4 and NUDC in mitotic spindle formation	-2.61913	-0.968547	5528,10726,348995	PPP2R5D,NUDC,NUP43	3/99
6_Member	Reactome Gene Sets	R-HSA-9824446	Viral Infection Pathways	-2.59443	-0.951141	3615,6130,6207,8517,10213,23511,348995	IMPDH2,RPL7A,RPS13,IKBKG,PSMD14,NUP188,NUP43	7/692
6_Member	Reactome Gene Sets	R-HSA-2500257	Resolution of Sister Chromatid Cohesion	-2.52354	-0.894488	5528,10726,348995	PPP2R5D,NUDC,NUP43	3/107
6_Member	Reactome Gene Sets	R-HSA-9705671	SARS-CoV-2 activates/modulates innate and adaptive immune responses	-2.52354	-0.894488	8517,23511,348995	IKBKG,NUP188,NUP43	3/107
6_Member	Reactome Gene Sets	R-HSA-913531	Interferon Signaling	-2.487	-0.864903	1973,8517,23511,348995	EIF4A1,IKBKG,NUP188,NUP43	4/227
6_Member	Reactome Gene Sets	R-HSA-5663220	RHO GTPases Activate Formins	-2.41437	-0.799115	5528,10726,348995	PPP2R5D,NUDC,NUP43	3/117
6_Member	Reactome Gene Sets	R-HSA-9694516	SARS-CoV-2 Infection	-2.29024	-0.688342	6207,8517,23511,348995	RPS13,IKBKG,NUP188,NUP43	4/258
6_Member	Reactome Gene Sets	R-HSA-9010553	Regulation of expression of SLITs and ROBOs	-2.18924	-0.611726	6130,6207,10213	RPL7A,RPS13,PSMD14	3/141
6_Member	Reactome Gene Sets	R-HSA-71387	Metabolism of carbohydrates	-2.18807	-0.611726	5528,23511,55276,348995	PPP2R5D,NUP188,PGM2,NUP43	4/276
6_Member	Reactome Gene Sets	R-HSA-3108232	SUMO E3 ligases SUMOylate target proteins	-2.18079	-0.610611	8517,23511,348995	IKBKG,NUP188,NUP43	3/142
6_Member	Reactome Gene Sets	R-HSA-2990846	SUMOylation	-2.13146	-0.573342	8517,23511,348995	IKBKG,NUP188,NUP43	3/148
6_Member	Reactome Gene Sets	R-HSA-1280215	Cytokine Signaling in Immune system	-2.09575	-0.543537	1973,5528,8517,10213,23511,348995	EIF4A1,PPP2R5D,IKBKG,PSMD14,NUP188,NUP43	6/651
7_Summary	Reactome Gene Sets	R-HSA-6798695	Neutrophil degranulation	-2.9543	-1.21727	1727,3615,8621,10213,55276,55860	CYB5R3,IMPDH2,CDK13,PSMD14,PGM2,ACTR10	6/-
7_Member	Reactome Gene Sets	R-HSA-6798695	Neutrophil degranulation	-2.9543	-1.21727	1727,3615,8621,10213,55276,55860	CYB5R3,IMPDH2,CDK13,PSMD14,PGM2,ACTR10	6/435
8_Summary	Reactome Gene Sets	R-HSA-382556	ABC-family proteins mediated transport	-2.80834	-1.1193	5824,10213,10613	PEX19,PSMD14,ERLIN1	3/-
8_Member	Reactome Gene Sets	R-HSA-382556	ABC-family proteins mediated transport	-2.80834	-1.1193	5824,10213,10613	PEX19,PSMD14,ERLIN1	3/85
9_Summary	Reactome Gene Sets	R-HSA-69239	Synthesis of DNA	-2.65715	-0.990019	6118,10213,10393,1021,642,5528,8517,55860	RPA2,PSMD14,ANAPC10,CDK6,BLMH,PPP2R5D,IKBKG,ACTR10	8/-
9_Member	Reactome Gene Sets	R-HSA-69239	Synthesis of DNA	-2.65715	-0.990019	6118,10213,10393	RPA2,PSMD14,ANAPC10	3/96
9_Member	Reactome Gene Sets	R-HSA-453279	Mitotic G1 phase and G1/S transition	-2.38359	-0.775068	1021,6118,10213	CDK6,RPA2,PSMD14	3/120
9_Member	Reactome Gene Sets	R-HSA-69242	S Phase	-2.27752	-0.682153	6118,10213,10393	RPA2,PSMD14,ANAPC10	3/131
9_Member	Reactome Gene Sets	R-HSA-69002	DNA Replication Pre-Initiation	-2.2237	-0.634766	6118,10213,10393	RPA2,PSMD14,ANAPC10	3/137
9_Member	Reactome Gene Sets	R-HSA-1280218	Adaptive Immune System	-2.17219	-0.608079	642,5528,8517,10213,10393,55860	BLMH,PPP2R5D,IKBKG,PSMD14,ANAPC10,ACTR10	6/627
9_Member	Reactome Gene Sets	R-HSA-983169	Class I MHC mediated antigen processing & presentation	-2.0291	-0.482719	642,8517,10213,10393	BLMH,IKBKG,PSMD14,ANAPC10	4/307

## Sheet: Supplementary Table 4 E
Supplementary Table 4 E. Gene annotation and binary enrichment results for selected underepresented proteins in TNBC cell line using the Reactome database. Includes Uniprot identifier, functional annotations, term memberships and binary values (1/0) indicating presence within enriched Reactome terms. Session id: t2qai9jjd (data: 19/06/2025)
MyList		Gene ID	Type	Tax ID	Homologene Gene ID	Homologene Gene Tax ID	R-HSA-5668914 Diseases of metabolism	R-HSA-199991 Membrane Trafficking
Q96N66	MBOAT7	79143	uniprot	H. sapiens	79143	H. sapiens	0	0
P46976	GYG1	2992	uniprot	H. sapiens	2992	H. sapiens	1	0
Q9Y6E2	BZW2	28969	uniprot	H. sapiens	28969	H. sapiens	0	0
Q9P258	RCC2	55920	uniprot	H. sapiens	55920	H. sapiens	0	0
O75390	CS	1431	uniprot	H. sapiens	1431	H. sapiens	0	0
P12004	PCNA	5111	uniprot	H. sapiens	5111	H. sapiens	0	0
P15586	GNS	2799	uniprot	H. sapiens	2799	H. sapiens	1	1
Q96A33	CCDC47	57003	uniprot	H. sapiens	57003	H. sapiens	0	0
P49755	TMED10	10972	uniprot	H. sapiens	10972	H. sapiens	0	1
Q9Y2V2	CARHSP1	23589	uniprot	H. sapiens	23589	H. sapiens	0	0
Q32P44	EML3	256364	uniprot	H. sapiens	256364	H. sapiens	0	0
P53582	METAP1	23173	uniprot	H. sapiens	23173	H. sapiens	0	0
Q96RQ3	MCCC1	56922	uniprot	H. sapiens	56922	H. sapiens	1	0
O00115	DNASE2	1777	uniprot	H. sapiens	1777	H. sapiens	0	1
Q9Y5Y2	NUBP2	10101	uniprot	H. sapiens	10101	H. sapiens	0	0
O14545	TRAFD1	10906	uniprot	H. sapiens	10906	H. sapiens	0	0
Q9H9B4	SFXN1	94081	uniprot	H. sapiens	94081	H. sapiens	0	0
Q9UL46	PSME2	5721	uniprot	H. sapiens	5721	H. sapiens	0	0
Q96LJ7	DHRS1	115817	uniprot	H. sapiens	115817	H. sapiens	0	0

## Sheet: Supplementary Table 4 F
Supplementary table 4 F. Enriched Reactome terms and functional clustering for selected underrepresented proteins im TNBC cell lines. This table lists all significantly enriched terms, their associated cluster group ID, and the representative term summarizing each functional cluster. . Session id: t2qai9jjd (data: 19/06/2025)
GroupID	Category	Term	Description	LogP	Log(q-value)	Genes	Symbols	InTerm_InList
1_Summary	Reactome Gene Sets	R-HSA-5668914	Diseases of metabolism	-3.34715	0	2799,2992,56922	GNS,GYG1,MCCC1	3/-
1_Member	Reactome Gene Sets	R-HSA-5668914	Diseases of metabolism	-3.34715	0	2799,2992,56922	GNS,GYG1,MCCC1	3/243
2_Summary	Reactome Gene Sets	R-HSA-199991	Membrane Trafficking	-2.32611	0	1777,2799,10972	DNASE2,GNS,TMED10	3/-
2_Member	Reactome Gene Sets	R-HSA-199991	Membrane Trafficking	-2.32611	0	1777,2799,10972	DNASE2,GNS,TMED10	3/553
2_Member	Reactome Gene Sets	R-HSA-5653656	Vesicle-mediated transport	-2.2582	0	1777,2799,10972	DNASE2,GNS,TMED10	3/585

## Sheet: Supplementary Table 4 G
Supplementary Table 4G. Orthologous proteins overrepresented by at least 30% (Log₂FC ≥ 0.378) in all triple-negative tumor cell lines ( ajdusted p valur < 0.05) compared to the 184B5 control line, with. CLF: Canis lupus familiaris. HSA: Homo sapiens. * adj p value < 0.05, ** adj p value < 0.01, *** adj p value < 0.001.
Uniprot CLF	Uniprot HSA	Gene CLF	Gene HSA	Protein Name (CLF)	Protein Name (HSA)	ko_id	KEGG: Brite Hierarchies
A0A8C0M352	Q14974	KPNB1		Karyopherin subunit beta 1	Importin subunit beta-1	K14293	Chromosome and associated proteins;Ribosome biogenesis
A0A8C0M836	Q14004	CDK13		Cyclin dependent kinase 13	Cyclin-dependent kinase 13	K08819	Enzyme;Protein kinases
A0A8C0MBF4	Q13895	BYSL		Bystin like	Bystin	K14797	Ribosome biogenesis
A0A8C0MEZ1	Q9Y3E5	PTRH2		peptidyl-tRNA hydrolase	Peptidyl-tRNA hydrolase 2, mitochondrial	K04794	Enzyme;Translation factors
A0A8C0MJY7	Q5SRE5	NUP188		Nucleoporin NUP188		K14311	Messenger RNA biogenesis
A0A8C0MK47	Q5SY16	NOL9		Polyribonucleotide 5'-hydroxyl-kinase Clp1 P-loop domain-containing protein	Polynucleotide 5'-hydroxyl-kinase NOL9	K06947	Ribosome biogenesis
A0A8C0MPZ5	O43818	RRP9		Ribosomal RNA processing 9, U3 small nucleolar RNA binding protein	U3 small nucleolar RNA-interacting protein 2	K14793	Ribosome biogenesis
A0A8C0MQZ1	Q9UM13	ANAPC10		Anaphase-promoting complex subunit 10		K03357	Chromosome and associated proteins;Ubiquitin system
A0A8C0MTT5	Q01804	OTUD4		ubiquitinyl hydrolase 1	OTU domain-containing protein 4	K13718	Enzyme;Peptidases and inhibitors
A0A8C0MXD8	Q8NE86	MCU		Calcium uniporter protein	Calcium uniporter protein, mitochondrial	K20858	Mitochondrial biogenesis;Transporters
A0A8C0MXK7	P15927	RPA2		Replication factor A protein 2	Replication protein A 32 kDa subunit	K10739	DNA repair and recombination proteins;DNA replication proteins
A0A8C0MY56	Q9H488		POFUT1	GDP-fucose protein O-fucosyltransferase 1		K03691	Enzyme;Glycosyltransferase
A0A8C0N583	Q15050	RRS1		Ribosome biogenesis regulatory protein	Ribosome biogenesis regulatory protein homolog	K14852	Ribosome biogenesis
A0A8C0N5N6	Q04206	RELA		RELA proto-onco, NF-kB subunit	Transcription factor p65	K04735	Transcription factors
A0A8C0N5Q9	Q01658	DR1		Protein Dr1		K21751	Chromosome and associated proteins;Transcription machinery
A0A8C0N8N8	P00568	AK1		Adenylate kinase isoenzyme 1		K00939	Enzyme;Exosome
A0A8C0NAE1	P35754	GLRX		Glutaredoxin-1		K03676	Chaperones and folding catalysts
A0A8C0ND18	Q9NWT1	PAK1IP1		PAK1 interacting protein 1	p21-activated protein kinase-interacting protein 1	K14830	Ribosome biogenesis
A0A8C0NEW7	Q14738	PPP2R5D		Serine/threonine-protein phosphatase 2A 56 kDa regulatory subunit	Serine/threonine-protein phosphatase 2A 56 kDa regulatory subunit delta isoform	K11584	Chromosome and associated proteins;Messenger RNA biogenesis;Protein phoshphatases and associated proteins
A0A8C0NGZ0	Q9BWM7	SFXN3		Sidoreflexin	Sideroflexin-3	K23500	Mitochondrial biogenesis;Transporters
A0A8C0NHF8	O43615	TIMM44		Mitochondrial import inner membrane translocase subunit TIM44		K17804	Mitochondrial biogenesis;Transporters
A0A8C0NHT7	P60842	EIF4A1		Eukaryotic initiation factor 4A-I		K03257	Exosome;Messenger RNA biogenesis;Translation factors
A0A8C0NPJ4	Q9NNW5	WDR6		tRNA (34-2'-O)-methyltransferase regulator WDR6		K24737	Domain-containing proteins not elsewhere classified
A0A8C0NV97	Q9ULW3		ABT1	Activator of basal transcription 1		K14785	Ribosome biogenesis
A0A8C0NWE7	O75940	SMNDC1		Survival of motor neuron-related-splicing factor 30		K12839	Spliceosome
A0A8C0NX49	O00541	PES1		Pescadillo homolog		K14843	Ribosome biogenesis
A0A8C0NYE4	Q16740	CLPP		ATP-dependent Clp protease proteolytic subunit	ATP-dependent Clp protease proteolytic subunit, mitochondrial	K01358	Enzyme;Peptidases and inhibitors
A0A8C0NYH7	Q92979	EMG1		EMG1 N1-specific pseudouridine methyltransferase	Ribosomal RNA small subunit methyltransferase NEP1	K14568	Enzyme;Ribosome biogenesis
A0A8C0P2T5	P30040	ERP29		Endoplasmic reticulum resident protein 29		K09586	Membrane trafficking
A0A8C0PDE6	Q13242	SRSF9		RRM domain-containing protein	Serine/arginine-rich splicing factor 9	K21123	Spliceosome
A0A8C0PKV5	Q8IZ73	RPUSD2		RNA pseudouridine synthase domain containing 2	Pseudouridylate synthase RPUSD2	hsa: 27079
A0A8C0PKY3	P52815	MRPL12		Mitochondrial ribosomal protein L12	Large ribosomal subunit protein bL12m	K02935	Ribosome
A0A8C0PM69	P10155	RO60		Ro60, Y RNA binding protein	RNA-binding protein RO60	K11089
A0A8C0PPG2	Q13867	BLMH		Bleomycin hydrolase		K01372	Enzyme;Peptidases and inhibitors
A0A8C0PRW0	Q96G03	PGM2		Phosphoglucomutase 2	Phosphopentomutase	K15779	Enzyme
A0A8C0PXH8	Q13426	XRCC4		X-ray repair cross complementing 4	DNA repair protein XRCC4	K10886	DNA repair and recombination proteins
A0A8C0PXV1	Q9Y266	NUDC		Nuclear migration protein nudC		K25866	Chromosome and associated proteins
A0A8C0Q768	Q96MX6	DNAAF10		Nuclear nucleic acid-binding protein C1D	Dynein axonemal assembly factor 10	K24761	Cytoskeleton proteins;Cilium and associated proteins
A0A8C0QA67	O00303	EIF3F		Eukaryotic translation initiation factor 3 subunit F		K03249	Exosome;Translation factors
A0A8C0QD92	P48637	GSS		Glutathione synthetase		K21456	Enzyme;Exosome
A0A8C0R9T4	Q9Y5J7	TIMM9		Mitochondrial import inner membrane translocase subunit	Mitochondrial import inner membrane translocase subunit Tim9	K17777	Mitochondrial biogenesis;Transporters
A0A8C0RE17	Q9BU89	DOHH		Deoxyhypusine hydroxylase		K06072	Enzyme
A0A8C0RHA9	Q9H5V8	CDCP1		CUB domain containing protein 1	CUB domain-containing protein 1	K06732	CD molecules
A0A8C0RI14	Q00059	TFAM		Transcription factor A, mitochondrial		K11830	Mitochondrial biogenesis
A0A8C0RSM9	Q14152	EIF3A		Eukaryotic translation initiation factor 3 subunit A		K03254	Translation factors
A0A8C0RWH2	Q9NZ32	ACTR10		Actin-related protein 10		K16576	Chromosome and associated proteins;Cytoskeleton proteins
A0A8C0SKF2	Q8WUA2	PPIL4		Peptidyl-prolyl cis-trans isomerase	Peptidyl-prolyl cis-trans isomerase-like 4	K12735	Enzyme;Spliceosome;Chaperones and folding catalysts
A0A8C0SMH6	Q8NFH3	NUP43		Nucleoporin 43	Nucleoporin Nup43	K14305	Chromosome and associated proteins;Messenger RNA biogenesis
A0A8C0SMR0	P62072	TIMM10		Mitochondrial import inner membrane translocase subunit	Mitochondrial import inner membrane translocase subunit Tim10	K17778	Mitochondrial biogenesis;Transporters
A0A8C0SN10	P00387	CYB5R3		NADH-cytochrome b5 reductase	NADH-cytochrome b5 reductase 3	K00326	Enzyme
A0A8C0SWZ8	P40855	PEX19		Peroxisomal biogenesis factor 19		K13337
A0A8C0T3T7	O75477	ERLIN1		Erlin	Erlin-1	K23341	Ubiquitin system
A0A8C0T752	Q9Y3D0	CIAO2B		Cytosolic iron-sulfur assembly component 2B		K26403	Chromosome and associated proteins;DNA repair and recombination proteins
A0A8C0T995	Q16543	CDC37		Hsp90 co-chaperone Cdc37		K09554	Mitochondrial biogenesis;Chaperones and folding catalysts
A0A8C0TA97	Q00534	CDK6		Cyclin-dependent kinase 6		K02091	Enzyme;Protein kinases
A0A8C0TBA8	P09001	MRPL3		Large ribosomal subunit protein uL3m		K02906	Ribosome
A0A8C0TC90	Q9BPX5	ARPC5L		Actin-related protein 2/3 complex subunit 5	Actin-related protein 2/3 complex subunit 5-like protein	K05754	Membrane trafficking;Cytoskeleton proteins
A0A8C0TCN1	Q6UXN9	WDR82		WD repeat domain 82	WD repeat-containing protein 82	K14962	Chromosome and associated proteins;Messenger RNA biogenesis
A0A8C0TDT4	P62277	RPS13		Small ribosomal subunit protein uS15		K02953	Ribosome
A0A8C0TIJ9	P48643	CCT5		T-complex protein 1 subunit epsilon		K09497	Exosome;Chaperones and folding catalysts;Cilium and associated proteins
A0A8C0TJP4	O00487	PSMD14		Proteasome 26S subunit, non-ATPase 14	26S proteasome non-ATPase regulatory subunit 14	K03030	Ubiquitin system;Peptidases and inhibitors;Proteasome
A0A8C0Z0Q7	Q9BZX2	UCK2		Uridine-cytidine kinase	Uridine-cytidine kinase 2	K00876	Enzyme
A0A8C0Z183	Q6RFH5	WDR74		WD repeat domain 74	WD repeat-containing protein 74	K14841	Ribosome biogenesis
A0A8C0Z207	Q12996	CSTF3		Cleavage stimulation factor subunit 3		K14408	Messenger RNA biogenesis
A0A8C0Z3I3	P12268	IMPDH2		Inosine-5'-monophosphate dehydrogenase	Inosine-5'-monophosphate dehydrogenase 2	K00088	Enzyme;Exosome
A0A8C0Z6N5	Q6NZY4	ZCCHC8		Zinc finger CCHC domain-containing protein 8		K13128	Spliceosome
A0A8I3P3A3	P30566	ADSL		Adenylosuccinate lyase		K01756	Enzyme
A0A8C0MDI5	Q6IQ22	RAB12		Ras-related protein Rab-12		hsa: 201475
A0A8C0NSG7	Q86V81	ALYREF		Aly/REF export factor	THO complex subunit 4	hsa: 10189
A0A8C0Z2S0	Q9BTE6		AARSD1	Alanyl-tRNA editing protein Aarsd1		K07050	Transfer RNA biogenesis
A0A8C0MIM7	Q9P1Y6	PHRF1		PHD and ring finger domains 1	PHD and RING finger domain-containing protein 1	K17586	Protein phoshphatases and associated proteins
A0A8C0NB60	Q8IXK0	PHC2		Polyhomeotic homolog 2	Polyhomeotic-like protein 2	K11457	Chromosome and associated proteins
A0A8C0NZE2	Q96GA3	LTV1		Protein LTV1 homolog		K14798	Ribosome biogenesis
A0A8C0PJJ6	P49593	PPM1F		PPM-type phosphatase domain-containing protein	Protein phosphatase 1F	K17502	Enzyme;Protein phoshphatases and associated proteins
A0A8C0QBL1	Q9NQZ2	UTP3		UTP3 small subunit processome component	Something about silencing protein 10	K14767	Ribosome biogenesis
A0A8C0MZ51	Q7Z422	SZRD1		SUZ RNA-binding domain-containing	SUZ domain-containing protein 1	hsa: 26099
A0A8C0RTV1	Q8WYA6	CTNNBL1		Beta-catenin-like protein 1 N-terminal domain-containing protein	Beta-catenin-like protein 1	K12864	Spliceosome
A0A8C0PLW8	P62424	RPL7A		60S ribosomal protein L7a	Large ribosomal subunit protein eL8	K02936	Ribosome biogenesis;Ribosome
A0A8C0MNM4	Q9NPF4	OSGEP		N(6)-L-threonylcarbamoyladenine synthase	tRNA N6-adenosine threonylcarbamoyltransferase	K01409	Enzyme;Transfer RNA biogenesis
A0A8C0RN05	Q7L5N1	COPS6		COP9 signalosome complex subunit 6		K12179	Ubiquitin system
A0A8C0TJE0	Q9Y6K9	IKBKG		NF-kappa-B essential modulator		K07210	Protein kinases
A0A8C0LWR4	Q96N66	MBOAT7		Lysophospholipid acyltransferase 7		K13516	Lipid biosynthesis proteins
A0A8C0MQB1	P46976	GYG1		glycogenin glucosyltransferase	Glycogenin-1	K00750	Enzyme;Glycosyltransferase
A0A8C0P2W0	Q9Y6E2		BZW2	eIF5-mimic protein 1		hsa: 28969
A0A8C0PRU0	Q9P258	RCC2		Regulator of chromosome condensation 2	Protein RCC2	hsa: 55920
A0A8C0Q4T7	O75390	CS		Citrate synthase	Citrate synthase, mitochondrial	K01647	Enzyme
A0A8C0QFQ6	P12004	PCNA		Proliferating cell nuclear antigen		K04802	DNA repair and recombination proteins;DNA replication proteins
A0A8C0RIZ9	P15586	GNS		N-acetylglucosamine-6-sulfatase		K01137	Enzyme
A0A8C0RJF2	Q96A33	CCDC47		PAT complex subunit CCDC47		K24962	Membrane trafficking;Chaperones and folding catalysts
A0A8C0RLR6	P49755	TMED10		Transmembrane emp24 domain-containing protein 10		K20352	Membrane trafficking
A0A8C0RYN1	Q9Y2V2	CARHSP1		CSD domain-containing protein	Calcium-regulated heat-stable protein 1	hsa: 23589
A0A8C0T8M3	Q32P44	EML3		EMAP like 3	Echinoderm microtubule-associated protein-like 3	K18596	Cytoskeleton proteins
A0A8C0TDV4	P53582	METAP1		Methionine aminopeptidase	Methionine aminopeptidase 1	K01265	Enzyme;Peptidases and inhibitors
A0A8C0TIF6	Q96RQ3	MCCC1		Methylcrotonyl-CoA carboxylase subunit 1	Methylcrotonoyl-CoA carboxylase subunit alpha, mitochondrial	K01968	Enzyme
A0A8C0TKS7	O00115	DNASE2		Deoxyribonuclease-2-alpha		K01158	Enzyme
A0A8I3S0W9	Q9Y5Y2	NUBP2		Cytosolic Fe-S cluster assembly factor NUBP2		hsa: 10101
A0A8C0P1Q1	O14545	TRAFD1		TRAF-type zinc finger domain-containing protein 1		hsa: 10906
A0A8C0M3P6	Q9H9B4	SFXN1		Sidoreflexin	Sideroflexin-1	K23500	Mitochondrial biogenesis;Transporters
A0A8C0PY46	Q9UL46	PSME2		Proteasome activator complex subunit 2		K06697	Proteasome
A0A8C0QGC6	Q96LJ7	DHRS1		Dehydrogenase/reductase 1	Dehydrogenase/reductase SDR family member 1	K11163
