# Supplementary material for: Comparative proteomic analysis in human and canine breast cancer cell line: identification of proteins linked to lipid dynamics and functions
Source: Research Square preprint supplement (doi:10.21203/rs.3.rs-8132817/v1), 2025-12-04
Supplement: Supplementary file 4 [file c6cdb6aead43585f957b32fc.xlsx]

## Sheet: Supplementary Table 1A
Supplementary Table 1A. List of orthologous proteins identified in human and canine cell lines, including Ensembl-derived query and target similarity percentages. ‘Query %’ indicates the proportion of the human (HSA) protein aligned to the canine (CLF) ortholog, and ‘Target %’ indicates the proportion of the canine protein aligned to the human ortholog. Functional annotation through the KEGG BRIT…
Uniprot CLF	Uniprot HSA	Gene CLF	Gene HSA	Protein Name (CLF)	Protein Name (HSA)	Query %ID	Target %ID	ko_id	KEGG: Brite Hierarchies
A0A222YTD8	Q9ULF5	SLC39A10		Solute carrier family 39 member 10	Zinc transporter ZIP10	91.0798	93.3815	K14716	Transporters
A0A8C0LQW9	P62330	ARF6		ADP ribosylation factor 6	ADP-ribosylation factor 6	100	100	K07941	Membrane trafficking;Exosome
A0A8C0LR10	Q96AG4	LRRC59		Leucine rich repeat containing 59	Leucine-rich repeat-containing protein 59	94.1176	93.8111	hsa: 55379
A0A8C0LRH2	P18887	XRCC1		X-ray repair cross complementing 1	DNA repair protein XRCC1	88.7122	88.1517	K10803	DNA repair and recombination proteins
A0A8C0LRV1	Q8N806	UBR7		Ubiquitin protein ligase E3 component n-recognin 7	Putative E3 ubiquitin-protein ligase UBR7	91.5294	91.5294	K11979	Enzyme;Ubiquitin system
A0A8C0LSC8	Q9BXV9	GON7		GON7 subunit of KEOPS complex	EKC/KEOPS complex subunit GON7	77	77	K15903	Transfer RNA biogenesis
A0A8C0LSD9	P46782	RPS5		Small ribosomal subunit protein uS7		73.1405	86.7647	K02989	Ribosome
A0A8C0LUT7	Q9GZP4	PITHD1		PITH domain-containing protein	PITH domain-containing protein 1	99.0521	99.0521	hsa: 57095
A0A8C0LV43	Q9P0K7	RAI14		Retinoic acid induced 14	Ankycorbin	87.0968	90.9184	hsa: 26064
A0A8C0LVE7	Q9NXG2	THUMPD1		THUMP domain-containing protein	THUMP domain-containing protein 1	87.9888	89.2351	K06963	Transfer RNA biogenesis
A0A8C0LVF0	Q96I25	RBM17		Splicing factor 45		99.2519	99.2519	K12840	Spliceosome
A0A8C0LW98	A6NDG6	PGP		Glycerol-3-phosphate phosphatase		94.3925	94.3925	K19269	Enzyme;Protein phoshphatases and associated proteins
A0A8C0LWR4	Q96N66	MBOAT7		Lysophospholipid acyltransferase 7		95.9746	95.9746	K13516	Lipid biosynthesis proteins
A0A8C0LWX1	P62249	RPS16		Small ribosomal subunit protein uS9		100	100	K02960	Ribosome
A0A8C0LX65	Q99536	VAT1		Vesicle amine transport 1	Synaptic vesicle membrane protein VAT-1 homolog	91	92.6209	K23167	Mitochondrial biogenesis
A0A8C0LX77	P46779	RPL28		Large ribosomal subunit protein eL28		98.5401	98.5401	K02903	Ribosome
A0A8C0LXK4	P62273	RPS29		Small ribosomal subunit protein uS14		51.4286	96.4286	K02980	Ribosome
A0A8C0LY40	Q14376	GALE		UDP-glucose 4-epimerase		93.3908	93.3908	K01784	Enzyme
A0A8C0LYL3	Q6P4I2	WDR73		WD repeat domain 73	WD repeat-containing protein 73	69.555	78.5714	K24754	Domain-containing proteins not elsewhere classified
A0A8C0LYY3	O76070	SNCG		Gamma-synuclein		86.6142	86.6142	K24202	Transporters
A0A8C0LZ00	P26368	U2AF2		Splicing factor U2AF subunit	Splicing factor U2AF 65 kDa subunit	100	100	K12837	Spliceosome
A0A8C0LZG9	Q96KP4	CNDP2		Cytosolic non-specific dipeptidase		91.7548	91.3684	K08660	Enzyme;Exosome;Peptidases and inhibitors
A0A8C0LZH0	Q9GZR2	REXO4		RNA exonuclease 4		69.1589	70.1422	K18327	Ribosome biogenesis
A0A8C0M0D1	Q96A35	MRPL24		Large ribosomal subunit protein uL24m		87.5	87.5	K02895	Ribosome
A0A8C0M0J2	Q8TED0	UTP15		U3 small nucleolar RNA-associated protein 15 homolog		94.7776	94.5946	K14549	Ribosome biogenesis
A0A8C0M0T8	Q9UNS2	COPS3		COP9 signalosome complex subunit 3		99.7636	99.7636	K12177	Ubiquitin system
A0A8C0M0Y9	P37198	NUP62		Nucleoporin NSP1-like C-terminal domain-containing protein	Nuclear pore glycoprotein p62	84.8197	85.6322	K14306	Messenger RNA biogenesis
A0A8C0M140	O15379	HDAC3		Histone deacetylase	Histone deacetylase 3	100	100	K11404	Enzyme;Chromosome and associated proteins
A0A8C0M169	P62263	RPS14		Small ribosomal subunit protein uS11		96.7949	100	K02955	Ribosome
A0A8C0M1F0	Q08211	DHX9		RNA helicase	ATP-dependent RNA helicase A	94.1223	94.5669	K13184	Enzyme;Spliceosome;Translation factors
A0A8C0M1Y1	Q9NW64	RBM22		Pre-mRNA-splicing factor RBM22		100	100	K12872	Spliceosome
A0A8C0M261	O60341	KDM1A		Lysine-specific histone demethylase	Lysine-specific histone demethylase 1A	99.0878	99.2009	K11450	Enzyme;Chromosome and associated proteins
A0A8C0M330	Q9NVE7	PANK4		4'-phosphopantetheine phosphatase		94.0492	94.0492	K24265
A0A8C0M352	Q14974	KPNB1		Karyopherin subunit beta 1	Importin subunit beta-1	99.4292	99.4292	K14293	Chromosome and associated proteins;Ribosome biogenesis
A0A8C0M3B9	P30405	PPIF		Peptidyl-prolyl cis-trans isomerase	Peptidyl-prolyl cis-trans isomerase F, mitochondrial	88.7805	87.9227	K09565	Enzyme;Chaperones and folding catalysts
A0A8C0M3S3	Q5UCC4	EMC10		ER membrane protein complex subunit 10		91.9847	91.9847	K23570	Membrane trafficking
A0A8C0M4B9	Q13131	PRKAA1		Acetyl-CoA carboxylase kinase	5'-AMP-activated protein kinase catalytic subunit alpha-1	77.2538	99.6422	K07198	Enzyme;Membrane trafficking;Mitochondrial biogenesis;Protein kinases
A0A8C0M4J8	Q9UHQ9	CYB5R1		NADH-cytochrome b5 reductase	NADH-cytochrome b5 reductase 1	90.8197	90.8197	K00326	Enzyme
A0A8C0M4U4	Q9P000	COMMD9		COMM domain containing 9	COMM domain-containing protein 9	94.9495	94.9495	K22565	Ubiquitin system
A0A8C0M4V5	Q9NQG5	RPRD1B		Regulation of nuclear pre-mRNA domain-containing protein	Regulation of nuclear pre-mRNA domain-containing protein 1B	100	100	K15559	Transcription machinery
A0A8C0M522	P46926	GNPDA1		Glucosamine-6-phosphate isomerase	Glucosamine-6-phosphate isomerase 1	94.8097	94.8097	K02564	Enzyme
A0A8C0M571	Q9UNF0	PACSIN2		Protein kinase C and casein kinase substrate in neurons 2	Protein kinase C and casein kinase substrate in neurons protein 2	94.0329	94.0329	K20123	Membrane trafficking
A0A8C0M582	Q9NWB6	ARGLU1		Arginine and glutamate rich 1	Arginine and glutamate-rich protein 1	100	100	K13173	Spliceosome
A0A8C0M599	Q8N1F7	NUP93		Nuclear pore complex protein Nup93		86.9189	98.1685	K14309	Messenger RNA biogenesis
A0A8C0M5X6	Q6PD62	CTR9		CTR9 homolog, Paf1/RNA polymerase II complex component	RNA polymerase-associated protein CTR9 homolog	98.4655	98.4655	K15176	Transcription machinery
A0A8C0M627	P11047	LAMC1		Laminin subunit gamma 1	Laminin subunit gamma-1	95.2114	95.1523	K05635
A0A8C0M641	P51452	DUSP3		Dual specificity protein phosphatase	Dual specificity protein phosphatase 3	97.8378	97.8378	K17614	Enzyme;Protein phoshphatases and associated proteins
A0A8C0M6Y2	Q9NXV2	KCTD5		Potassium channel tetramerization domain containing 5	BTB/POZ domain-containing protein KCTD5	97.0085	97.0085	K21914	Ubiquitin system
A0A8C0M746	Q01130	SRSF2		Serine/arginine-rich splicing factor 2		100	100	K12891	Spliceosome
A0A8C0M763	Q09161	NCBP1		Nuclear cap binding protein subunit 1	Nuclear cap-binding protein subunit 1	99.6203	99.6203	K12882	Spliceosome;Messenger RNA biogenesis
A0A8C0M7Z9	Q09666	AHNAK		PDZ domain-containing protein	Neuroblast differentiation-associated protein AHNAK	81.7248	85.1104	K23934
A0A8C0M836	Q14004	CDK13		Cyclin dependent kinase 13	Cyclin-dependent kinase 13	97.0238	97.0238	K08819	Enzyme;Protein kinases
A0A8C0M915	O43572	AKAP10		A-kinase anchoring protein 10	A-kinase anchor protein 10, mitochondrial	94.713	94.713	K16526	Membrane trafficking
A0A8C0M9C6	P49840	GSK3A		[tau protein] kinase	Glycogen synthase kinase-3 alpha	96.6874	96.6874	K08822	Enzyme;Protein kinases
A0A8C0M9X8	Q01664	TFAP4		Transcription factor AP-4		96.4392	96.1538	K09108	Transcription factors
A0A8C0MAD2	P50213	IDH3A		Isocitrate dehydrogenase [NAD] subunit, mitochondrial	Isocitrate dehydrogenase [NAD] subunit alpha, mitochondrial	97.541	97.541	K00030	Enzyme
A0A8C0MAM8	Q9HC36	MRM3		Mitochondrial rRNA methyltransferase 3	rRNA methyltransferase 3, mitochondrial	83.9243	84.5238	K20095	Ribosome biogenesis
A0A8C0MB25	Q8TF05	PPP4R1		Protein phosphatase 4 regulatory subunit 1	Serine/threonine-protein phosphatase 4 regulatory subunit 1	93.2561	93.1579	K15424	DNA repair and recombination proteins;Protein phoshphatases and associated proteins
A0A8C0MBF4	Q13895	BYSL		Bystin like	Bystin	93.3638	93.3638	K14797	Ribosome biogenesis
A0A8C0MC30	P22033	MMUT		Methylmalonyl-CoA mutase, mitochondrial		95.0667	95.0667	K01847	Enzyme
A0A8C0MCE1	O15400	STX7		Syntaxin-7		74.3243	84.2912	K08488	Membrane trafficking;Exosome
A0A8C0MCJ3	P62917	RPL8		Large ribosomal subunit protein uL2		100	100	K02938	Ribosome
A0A8C0MCJ9	P38646	HSPA9		Stress-70 protein, mitochondrial		98.6745	98.6745	K04043	Exosome;Messenger RNA biogenesis;Mitochondrial biogenesis;Chaperones and folding catalysts
A0A8C0MCU4	O60216	RAD21		RAD21 cohesin complex component	Double-strand-break repair protein rad21 homolog	98.7322	98.7322	K06670	Chromosome and associated proteins
A0A8C0MCX2	Q13438	OS9		Endoplasmic reticulum lectin	Protein OS-9	88.6398	88.9055	K10088	Lectins
A0A8C0MD63	Q8IXM3	MRPL41		Mitochondrial ribosomal protein L41		74.0741	72.9927	K17422	Ribosome
A0A8C0MD95	Q2TAA2	IAH1		Isoamyl acetate-hydrolyzing esterase 1 homolog		90.3614	90.7258	K23978	Enzyme
A0A8C0MDB0	Q99747	NAPG		Gamma-soluble NSF attachment protein		96.463	96.1538	K21198	Membrane trafficking
A0A8C0MDE6	Q9NQT5	EXOSC3		Ribosomal RNA-processing protein 40	Exosome complex component RRP40	56.5749	67.2727	K03681	Messenger RNA biogenesis
A0A8C0MDU2	P61011	SRP54		Signal recognition particle 54 kDa protein	Signal recognition particle subunit SRP54	100	100	K03106	Enzyme; Secretion system
A0A8C0MDW6	Q6GQQ9	OTUD7B		ubiquitinyl hydrolase 1	OTU domain-containing protein 7B	93.4757	93.4757	K11860	Enzyme;Ubiquitin system;Peptidases and inhibitors
A0A8C0MDY8	O95433	AHSA1		Activator of HSP90 ATPase activity 1	Activator of 90 kDa heat shock protein ATPase homolog 1	97.3373	97.3373	K26216	Chaperones and folding catalysts
A0A8C0MEE4	Q6ICG6	KIAA0930		KIAA0930	Uncharacterized protein KIAA0930	64.2741	97.5247	hsa: 23313
A0A8C0MEP0	Q9UH65	SWAP70		Switching B cell complex subunit SWAP70	Switch-associated protein 70	96.0684	96.0684	K20072	Membrane trafficking
A0A8C0MEQ2	O95571	ETHE1		ETHE1 persulfide dioxygenase	Persulfide dioxygenase ETHE1, mitochondrial	92.9134	92.9134	K17725	Enzyme;Mitochondrial biogenesis
A0A8C0MEZ1	Q9Y3E5	PTRH2		peptidyl-tRNA hydrolase	Peptidyl-tRNA hydrolase 2, mitochondrial	88.2682	88.2682	K04794	Enzyme;Translation factors
A0A8C0MFD6	Q3YEC7	RABL6		RAB, member RAS onco family like 6	Rab-like protein 6	79.5804	78.0521	hsa: 55684
A0A8C0MFG3	P48634	PRRC2A		Proline rich coiled-coil 2A	Protein PRRC2A	90.9007	91.2378	hsa: 7916
A0A8C0MFM1	Q13123	IK		IK cytokine	Protein Red	98.1718	96.4093	K13109	Spliceosome
A0A8C0MG20	P68371	TUBB4B		Tubulin beta chain	Tubulin beta-4B chain	100	100	K07375	Chromosome and associated proteins;Exosome;Cytoskeleton proteins
A0A8C0MGU4	P19404	NDUFV2		NADH dehydrogenase [ubiquinone] flavoprotein 2, mitochondrial		96.3855	96.3855	K03943	Enzyme
A0A8C0MGW9	Q9NP92	MRPS30		Mitochondrial ribosomal protein S30	Large ribosomal subunit protein mL65	82.3944	79.9544	K17409	Ribosome
A0A8C0MHI6	O75312	ZPR1		Zinc finger ZPR1-type domain-containing protein	Zinc finger protein ZPR1	90	90.1961	K06874	Spliceosome
A0A8C0MI55	O75489	NDUFS3		NADH dehydrogenase [ubiquinone] iron-sulfur protein 3, mitochondrial		91.3534	92.0455	K03936	Enzyme
A0A8C0MI93	P82921	MRPS21		Mitochondrial ribosomal protein S21	Small ribosomal subunit protein bS21m	93.1034	93.1034	K02970	Ribosome
A0A8C0MIF6	P11387	TOP1		DNA topoisomerase I	DNA topoisomerase 1	97.4026	98.0392	K03163	Enzyme;DNA replication proteins
A0A8C0MIT4	P11021	HSPA5		78 kDa glucose-regulated protein	Endoplasmic reticulum chaperone BiP	99.0826	99.0826	K09490	Enzyme;Membrane trafficking;Exosome;Chaperones and folding catalysts
A0A8C0MIW9	P32969	RPL9		Large ribosomal subunit protein uL6		100	100	K02940	Ribosome
A0A8C0MJ01	Q9BT73	PSMG3		Proteasome assembly chaperone 3		83.6066	83.6066	K11877	Proteasome
A0A8C0MJ77	Q9HCU5	PREB		Prolactin regulatory element-binding protein		92.823	93.0456	K14003	Membrane trafficking
A0A8C0MJE2	Q8N5M4	TTC9C		Tetratricopeptide repeat domain 9C	Tetratricopeptide repeat protein 9C	76.5027	81.8713	K24930	Domain-containing proteins not elsewhere classified
A0A8C0MJK1	Q9UPT8	ZC3H4		Zinc finger CCCH-type containing 4	Zinc finger CCCH domain-containing protein 4	93.41	93.5533	hsa: 23211
A0A8C0MJY7	Q5SRE5	NUP188		Nucleoporin NUP188		95.605	95.769	K14311	Messenger RNA biogenesis
A0A8C0MK47	Q5SY16	NOL9		Polyribonucleotide 5'-hydroxyl-kinase Clp1 P-loop domain-containing protein	Polynucleotide 5'-hydroxyl-kinase NOL9	80.4064	78.9174	K06947	Ribosome biogenesis
A0A8C0MKQ1	Q12769	NUP160		Nucleoporin 160	Nuclear pore complex protein Nup160	90.1114	92.2967	K14303	Chromosome and associated proteins;Messenger RNA biogenesis
A0A8C0MLG0	P49711	CTCF		CCCTC-binding factor	Transcriptional repressor CTCF	99.5873	99.5873	K23195	Chromosome and associated proteins;Transcription factors
A0A8C0MLT7	P00491	PNP		Purine nucleoside phosphorylase		83.1034	83.391	K03783	Enzyme
A0A8C0MLV8	O95619	YEATS4		YEATS domain containing 4	YEATS domain-containing protein 4	99.1189	99.1189	K11341	Chromosome and associated proteins
A0A8C0MMG5	O43805	SSNA1		SS nuclear autoantigen 1	Microtubule nucleation factor SSNA1	95.7983	95.7983	K16780	Chromosome and associated proteins;Cilium and associated proteins
A0A8C0MMS2	Q9NRL2	BAZ1A		Bromodomain adjacent to zinc finger domain 1A	Bromodomain adjacent to zinc finger domain protein 1A	94.9261	94.9871	K11655	Chromosome and associated proteins
A0A8C0MN34	Q99497	PARK7		protein deglycase	Parkinson disease protein 7	53.1987	83.5979	K05687	Enzyme;Exosome;Peptidases and inhibitors
A0A8C0MN88	O43660	PLRG1		Pleiotropic regulator 1		95.7282	95.9144	K12862	Spliceosome;DNA repair and recombination proteins
A0A8C0MN98	O00148	DDX39A		RNA helicase	ATP-dependent RNA helicase DDX39A	97.8923	97.8923	K13182	Enzyme;Spliceosome
A0A8C0MPZ5	O43818	RRP9		Ribosomal RNA processing 9, U3 small nucleolar RNA binding protein	U3 small nucleolar RNA-interacting protein 2	94.7368	94.7368	K14793	Ribosome biogenesis
A0A8C0MQB1	P46976	GYG1		glycogenin glucosyltransferase	Glycogenin-1	94.5714	94.5714	K00750	Enzyme;Glycosyltransferase
A0A8C0MQZ1	Q9UM13	ANAPC10		Anaphase-promoting complex subunit 10		100	100	K03357	Chromosome and associated proteins;Ubiquitin system
A0A8C0MRF1	Q9UDY4	DNAJB4		DnaJ heat shock protein family (Hsp40) member B4	DnaJ homolog subfamily B member 4	96.7359	96.7359	K09510	Chaperones and folding catalysts
A0A8C0MRF6	O75937	DNAJC8		DnaJ heat shock protein family (Hsp40) member C8	DnaJ homolog subfamily C member 8	98.419	98.419	K09528	Spliceosome;Chaperones and folding catalysts
A0A8C0MRG6	P28070	PSMB4		Proteasome subunit beta	Proteasome subunit beta type-4	58.6626	73.1061	K02736	Enzyme;Peptidases and inhibitors;Proteasome
A0A8C0MS49	P49257	LMAN1		Lectin, mannose binding 1	Protein ERGIC-53	89.3822	90.7843	K10080	Membrane trafficking;Lectins
A0A8C0MSK9	O00469	PLOD2		procollagen-lysine 5-dioxygenase	Procollagen-lysine,2-oxoglutarate 5-dioxygenase 2	93.6031	94.591	K13645	Enzyme
A0A8C0MSV9	P61981	YWHAG		14-3-3 protein gamma		100	100	K16198	Exosome;DNA repair and recombination proteins;Protein phoshphatases and associated proteins
A0A8C0MSY3	O95159	ZFPL1		Zinc finger protein-like 1		93.5897	94.1936	hsa: 7542
A0A8C0MT68	Q15428	SF3A2		Splicing factor 3a subunit 2		92.4686	95.2586	K12826	Spliceosome
A0A8C0MTF3	P84098	RPL19		Ribosomal protein L19	Large ribosomal subunit protein eL19	100	100	K02885	Ribosome
A0A8C0MTI6	Q9NVJ2	ARL8B		ADP-ribosylation factor-like protein 8B		100	100	K07955	Membrane trafficking
A0A8C0MTM8	P06280	GLA		Alpha-galactosidase	Alpha-galactosidase A	82.8571	81.1189	K01189	Enzyme
A0A8C0MTT5	Q01804	OTUD4		ubiquitinyl hydrolase 1	OTU domain-containing protein 4	91.426	90.9336	K13718	Enzyme;Peptidases and inhibitors
A0A8C0MW29	Q9HB40	SCPEP1		Carboxypeptidase	Retinoid-inducible serine carboxypeptidase	89.5323	88.938	K09646	Peptidases and inhibitors
A0A8C0MWK7	Q14258	TRIM25		Tripartite motif containing 25	E3 ubiquitin/ISG15 ligase TRIM25	75.1189	75.2381	K10652	Enzyme;Ubiquitin system
A0A8C0MWR0	Q9UII2	ATP5IF1		ATPase inhibitor, mitochondrial		77.3585	77.3585	K22255	Membrane trafficking
A0A8C0MWY5	O14907	TAX1BP3		Tax1-binding protein 3		100	100	K24067	Domain-containing proteins not elsewhere classified
A0A8C0MXD8	Q8NE86	MCU		Calcium uniporter protein	Calcium uniporter protein, mitochondrial	98.8571	98.5755	K20858	Mitochondrial biogenesis;Transporters
A0A8C0MXK7	P15927	RPA2		Replication factor A protein 2	Replication protein A 32 kDa subunit	89.3773	90.3704	K10739	DNA repair and recombination proteins;DNA replication proteins
A0A8C0MY56	Q9H488		POFUT1	GDP-fucose protein O-fucosyltransferase 1		91.5601	92.268	K03691	Enzyme;Glycosyltransferase
A0A8C0MYP5	P28072	PSMB6		Proteasome subunit beta	Proteasome subunit beta type-6	96.2343	96.2343	K02738	Enzyme;Peptidases and inhibitors;Proteasome
A0A8C0MZS3	Q15397	PUM3		Pumilio RNA binding family member 3	Pumilio homolog 3	91.5123	91.5123	K14844	Messenger RNA biogenesis;Ribosome biogenesis
A0A8C0N0A9	P50750	CDK9		Cyclin dependent kinase 9	Cyclin-dependent kinase 9	74.8466	98.3871	K02211	Enzyme;Transcription machinery;Protein kinases
A0A8C0N0G5	Q9Y2Q9	MRPS28		Mitochondrial ribosomal protein S28	Small ribosomal subunit protein bS1m	80.663	78.0749	K17407	Ribosome
A0A8C0N1A7	P12236	SLC25A6		ADP/ATP translocase	ADP/ATP translocase 3	98.6577	98.6577	K05863	Mitochondrial biogenesis;Transporters
A0A8C0N1W9	Q8TEQ6	GEMIN5		Gem nuclear organelle associated protein 5	Gem-associated protein 5	88.5279	88.5279	K13133	Spliceosome;Messenger RNA biogenesis
A0A8C0N2D6	Q13144	EIF2B5		Translation initiation factor eIF2B subunit epsilon		91.6324	92.6491	K03240	Translation factors
A0A8C0N2F6	P26373	RPL13		60S ribosomal protein L13	Large ribosomal subunit protein eL13	99.0521	99.0521	K02873	Ribosome
A0A8C0N2N7	Q92934	BAD		BCL2 associated agonist of cell death	Bcl2-associated agonist of cell death	80.8383	80.3571	K02158
A0A8C0N2S9	Q9GZM5	YIPF3		Protein YIPF3		97.6945	96.8571	K22941	Membrane trafficking
A0A8C0N325	Q9BUL5	PHF23		PHD finger protein 23		95.5335	95.5335	K27476	Membrane trafficking
A0A8C0N390	Q9BPX6	MICU1		Calcium uptake protein 1, mitochondrial		94.0083	95.5882	K22827	Mitochondrial biogenesis;Domain-containing proteins not elsewhere classified
A0A8C0N3I1	Q9Y6D6	ARFGEF1		ADP ribosylation factor guanine nucleotide exchange factor 1	Brefeldin A-inhibited guanine nucleotide-exchange protein 1	98.7561	98.7561	K18442	Membrane trafficking
A0A8C0N3K7	Q96CW1	AP2M1		AP-2 complex subunit mu		100	100	K11826	Membrane trafficking
A0A8C0N3X8	P61457	PCBD1		Pterin-4-alpha-carbinolamine dehydratase		99.0385	99.0385	K01724	Enzyme;Exosome
A0A8C0N413	Q9NX08	COMMD8		COMM domain containing 8		85.7924	85.7924	K22564	Ubiquitin system
A0A8C0N4F0	O95470	SGPL1		sphinganine-1-phosphate aldolase	Sphingosine-1-phosphate lyase 1	93.3099	93.3099	K01634	Enzyme
A0A8C0N4G3	Q9BZG1	RAB34		RAB34, member RAS onco family	Ras-related protein Rab-34	78.0328	91.8919	K07921
A0A8C0N4M9	P31153	MAT2A		S-adenosylmethionine synthase	S-adenosylmethionine synthase isoform type-2	92.7361	96.962	K00789	Enzyme
A0A8C0N4X7	Q9H0U6	MRPL18		Mitochondrial ribosomal protein L18	Large ribosomal subunit protein uL18m	84.0206	90.5556	K02881	Ribosome
A0A8C0N583	Q15050	RRS1		Ribosome biogenesis regulatory protein	Ribosome biogenesis regulatory protein homolog	94.2466	94.2466	K14852	Ribosome biogenesis
A0A8C0N5E1	Q13247	SRSF6		RRM domain-containing protein	Serine/arginine-rich splicing factor 6	97.9651	97.9651	K12893	Spliceosome
A0A8C0N5N6	Q04206	RELA		RELA proto-onco, NF-kB subunit	Transcription factor p65	92.6199	91.1071	K04735	Transcription factors
A0A8C0N5Q9	Q01658	DR1		Protein Dr1		99.4318	99.4318	K21751	Chromosome and associated proteins;Transcription machinery
A0A8C0N5R6	O43592	XPOT		Exportin-T		97.732	98.5447	K14288	Transfer RNA biogenesis
A0A8C0N6A8	Q13033	STRN3		Striatin 3		97.6	91.8444	K17608	Protein phoshphatases and associated proteins
A0A8C0N6K3	Q14197	MRPL58		Large ribosomal subunit protein mL62		84.466	84.466	K15033	Enzyme;Translation factors
A0A8C0N6Q3	Q9NXV6	CDKN2AIP		CDKN2A interacting protein		92.0415	91.7241	hsa: 55602
A0A8C0N6R2	P53597	SUCLG1		Succinate--CoA ligase [ADP/GDP-forming] subunit alpha, mitochondrial		94.5087	94.5087	K01899	Enzyme
A0A8C0N702	Q9UNE7	STUB1		E3 ubiquitin-protein ligase CHIP		98.0198	98.0198	K09561	Enzyme;Membrane trafficking;Ubiquitin system;Chaperones and folding catalysts
A0A8C0N7E3	O76071	CIAO1		Probable cytosolic iron-sulfur protein assembly protein CIAO1		97.3451	97.3451	K24730	Chromosome and associated proteins;DNA repair and recombination proteins
A0A8C0N7M9	Q9UI30	TRMT112		Multifunctional methyltransferase subunit TRM112-like protein		83.2	83.2	K15448	Translation factors;Transfer RNA biogenesis
A0A8C0N7Z8	Q9GZT8	NIF3L1		NIF3-like protein 1		87.7984	87.7984	hsa: 60491
A0A8C0N8I9	Q15056	EIF4H		Eukaryotic translation initiation factor 4H		89.8438	92.7419	K24086	Messenger RNA biogenesis;Translation factors
A0A8C0N8N8	P00568	AK1		Adenylate kinase isoenzyme 1		90	97.4227	K00939	Enzyme;Exosome
A0A8C0N975	O75351	VPS4B		Vacuolar protein sorting 4 homolog B	Vacuolar protein sorting-associated protein 4B	83.5644	95.045	K12196	Membrane trafficking;DNA repair and recombination proteins
A0A8C0N9V5	Q9BSH4	TACO1		Translational activator of cytochrome c oxidase I		84.5638	84.8485	K18189	Mitochondrial biogenesis
A0A8C0NA32	Q9Y3S2	ZNF330		Zinc finger protein 330		97.1875	97.1875	hsa: 27309
A0A8C0NA46	Q99614	TTC1		Tetratricopeptide repeat domain 1	Tetratricopeptide repeat protein 1	87.7133	88.0137	K24926	Chaperones and folding catalysts
A0A8C0NAE1	P35754	GLRX		Glutaredoxin-1		73.5849	73.5849	K03676	Chaperones and folding catalysts
A0A8C0NAS9	Q5T653	MRPL2		Mitochondrial ribosomal protein L2	Large ribosomal subunit protein uL2m	88.8889	89.1803	K02886	Ribosome
A0A8C0NAT7	Q02750	MAP2K1		Dual specificity mitogen-activated protein kinase kinase 1		90.0922	99.4911	K04368	Enzyme;Protein kinases
A0A8C0NBI7	Q9NYJ8	TAB2		TGF-beta-activated kinase 1 and MAP3K7-binding protein 2		96.5368	96.5368	K04404
A0A8C0NBN1	Q9H299	SH3BGRL3		SH3 domain-binding glutamic acid-rich-like protein 3		100	100	K23740	Domain-containing proteins not elsewhere classified
A0A8C0NBW7	Q92783	STAM		Signal transducing adaptor molecule	Signal transducing adapter molecule 1	96.2825	95.9259	K04705	Membrane trafficking
A0A8C0NCE2	Q13541	EIF4EBP1		Eukaryotic translation initiation factor 4E binding protein 1	Eukaryotic translation initiation factor 4E-binding protein 1	94.9153	94.9153	K07205	Messenger RNA biogenesis
A0A8C0NCG0	Q5T0W9	FAM83B		Family with sequence similarity 83 member B	Protein FAM83B	88.4729	88.8229	K23930	Domain-containing proteins not elsewhere classified
A0A8C0NCL1	O75347	TBCA		Tubulin-specific chaperone A		92.5926	92.5926	K17292	Exosome;Cytoskeleton proteins
A0A8C0ND18	Q9NWT1	PAK1IP1		PAK1 interacting protein 1	p21-activated protein kinase-interacting protein 1	78.6058	83.4184	K14830	Ribosome biogenesis
A0A8C0ND40	Q2NKX8	ERCC6L		ERCC excision repair 6 like, spindle assembly checkpoint helicase	DNA excision repair protein ERCC-6-like	79.8896	81.04	K20093	Chromosome and associated proteins
A0A8C0NDM8	Q9HCE5	METTL14		N6-adenosine-methyltransferase non-catalytic subunit		99.5614	99.5614	K23960	Messenger RNA biogenesis
A0A8C0NEJ2	O95182	NDUFA7		NADH dehydrogenase [ubiquinone] 1 alpha subcomplex subunit 7		85.8407	85.8407	K03951
A0A8C0NEW7	Q14738	PPP2R5D		Serine/threonine-protein phosphatase 2A 56 kDa regulatory subunit	Serine/threonine-protein phosphatase 2A 56 kDa regulatory subunit delta isoform	98.6755	99.0033	K11584	Chromosome and associated proteins;Messenger RNA biogenesis;Protein phoshphatases and associated proteins
A0A8C0NFH1	Q14746	COG2		Conserved oligomeric Golgi complex subunit 2		92.1303	92.0054	K20289	Membrane trafficking
A0A8C0NFL6	P04183	TK1		Thymidine kinase	Thymidine kinase, cytosolic	89.2562	92.3077	K00857	Enzyme
A0A8C0NFX7	Q9BWD1	ACAT2		acetyl-CoA C-acetyltransferase	Acetyl-CoA acetyltransferase, cytosolic	89.9244	89.9244	K00626	Enzyme;Exosome
A0A8C0NGE3	Q96ME1	FBXL18		F-box/LRR-repeat protein 18		87.037	91.6435	K10284	Ubiquitin system
A0A8C0NGE4	Q9Y2B0	CNPY2		Saposin B-type domain-containing protein	Protein canopy homolog 2	98.9011	98.9011	K22936	Membrane trafficking
A0A8C0NGK3	Q92520	FAM3C		Protein FAM3C		98.6784	98.6784	hsa: 10447
A0A8C0NGZ0	Q9BWM7	SFXN3		Sidoreflexin	Sideroflexin-3	93.5385	94.704	K23500	Mitochondrial biogenesis;Transporters
A0A8C0NHA5	Q9UBL3	ASH2L		ASH2 like, histone lysine methyltransferase complex subunit	Set1/Ash2 histone methyltransferase complex subunit ASH2	95.7413	96.6561	K14964	Chromosome and associated proteins
A0A8C0NHD1	P28066	PSMA5		Proteasome subunit alpha type	Proteasome subunit alpha type-5	100	100	K02729	Enzyme;Peptidases and inhibitors;Proteasome
A0A8C0NHF8	O43615	TIMM44		Mitochondrial import inner membrane translocase subunit TIM44		92.7313	93.1416	K17804	Mitochondrial biogenesis;Transporters
A0A8C0NHI7	O95232	LUC7L3		Luc7-like protein	Luc7-like protein 3	86.9121	98.3796	hsa: 51747
A0A8C0NHS9	P55072	VCP		Transitional endoplasmic reticulum ATPase		99.8759	99.8759	K13525	Membrane trafficking;Exosome;Messenger RNA biogenesis;Ribosome biogenesis
A0A8C0NHT7	P60842	EIF4A1		Eukaryotic initiation factor 4A-I		100	100	K03257	Exosome;Messenger RNA biogenesis;Translation factors
A0A8C0NHX1	Q9H082	RAB33B		RAB33B, member RAS oncogene family	Ras-related protein Rab-33B	98.2222	96.5066	K07920	Membrane trafficking;Exosome
A0A8C0NI19	P78346	RPP30		Ribonuclease P/MRP subunit p30	Ribonuclease P protein subunit p30	94.0299	94.0299	K03539	Enzyme;Ribosome biogenesis;Mitochondrial biogenesis;Transfer RNA biogenesis
A0A8C0NI34	Q99661	KIF2C		Kinesin-like protein	Kinesin-like protein KIF2C	91.7241	91.7241	K10393	Chromosome and associated proteins;Cytoskeleton proteins
A0A8C0NJ10	Q9BRP8	PYM1		PYM homolog 1, exon junction complex associated factor	Partner of Y14 and mago	92.6108	92.1569	K14294	Messenger RNA biogenesis
A0A8C0NJA5	Q15121	PEA15		Astrocytic phosphoprotein PEA-15		80.7453	100	hsa: 8682
A0A8C0NJC4	P11182	DBT		Dihydrolipoamide acetyltransferase component of pyruvate dehydrogenase complex	Lipoamide acyltransferase component of branched-chain alpha-keto acid dehydrogenase complex, mitochondrial	91.2863	91.2863	K09699	Enzyme
A0A8C0NJF4	Q9NPJ3	ACOT13		Acyl-coenzyme A thioesterase 13		69.8718	77.8571	K17362	Lipid biosynthesis proteins
A0A8C0NK19	Q96B23	ARK2N		Chromosome 7 C18orf25 homolog	Protein ARK2N	96.3145	97.0297	hsa: 147339
A0A8C0NKA4	P19367	HK1		Hexokinase-1		87.9639	95.6379	K00844	Enzyme;Membrane trafficking
A0A8C0NKF1	Q96B26	EXOSC8		Ribosomal RNA-processing protein 43	Exosome complex component RRP43	86.039	96.0145	K12586	Messenger RNA biogenesis
A0A8C0NL23	P41226	UBA7		Ubiquitin-like modifier-activating enzyme 7		81.25	80.9289	K10698	Enzyme;Ubiquitin system
A0A8C0NLD6	Q8NCG7	DAGLB		sn-1-specific diacylglycerol lipase	Diacylglycerol lipase-beta	85.842	85.7143	K13806	Enzyme
A0A8C0NLD8	Q7Z4W1	DCXR		L-xylulose reductase		86.4754	86.4754	K03331	Enzyme
A0A8C0NM54	Q9UKK9	NUDT5		Nudix hydrolase 5	ADP-sugar pyrophosphatase	86.5217	90.8676	K13987	Enzyme
A0A8C0NMY3	Q8IX12	CCAR1		Cell division cycle and apoptosis regulator 1	Cell division cycle and apoptosis regulator protein 1	98.8696	98.8696	K25827	Transcription machinery
A0A8C0NNG9	Q9BXB5	OSBPL10		Oxysterol-binding protein	Oxysterol-binding protein-related protein 10	95.4128	95.288	K20465	Membrane trafficking
A0A8C0NNM2	P51571	SSR4		Translocon-associated protein subunit delta		97.6879	97.6879	K04571	Membrane trafficking
A0A8C0NNS7	Q96EP5	DAZAP1		DAZ-associated protein 1		99.5074	99.2629	K14411	Messenger RNA biogenesis
A0A8C0NPJ4	Q9NNW5	WDR6		tRNA (34-2'-O)-methyltransferase regulator WDR6		93.5657	93.3988	K24737	Domain-containing proteins not elsewhere classified
A0A8C0NPX9	P30101	PDIA3		Protein disulfide-isomerase	Protein disulfide-isomerase A3	95.6436	95.6436	K08056	Enzyme;Membrane trafficking;Exosome;Chaperones and folding catalysts
A0A8C0NPZ3	Q13442	PDAP1		PDGFA associated protein 1	28 kDa heat- and acid-stable phosphoprotein	98.9011	99.4475	hsa: 11333
A0A8C0NQ85	Q13547	HDAC1		Histone deacetylase	Histone deacetylase 1	99.1701	99.1701	K06067	Enzyme;Chromosome and associated proteins
A0A8C0NR61	Q96PK6	RBM14		RNA binding motif protein 14	RNA-binding protein 14	99.701	99.701	K13189	Spliceosome
A0A8C0NR66	Q96T37	RBM15		RNA binding motif protein 15	RNA-binding protein 15	96.388	95.5988	K13190	Spliceosome;Messenger RNA biogenesis
A0A8C0NRA0	Q9UQ13	SHOC2		SHOC2 leucine rich repeat scaffold protein	Leucine-rich repeat protein SHOC-2	99.6564	99.6564	K19613
A0A8C0NRA6	P83731	RPL24		Large ribosomal subunit protein eL24		100	100	K02896	Ribosome
A0A8C0NS39	Q9BTV4	TMEM43		Transmembrane protein 43		86.2471	92.5	K27488
A0A8C0NSG8	P50281	MMP14		Matrix metalloproteinase-14		97.079	97.079	K07763	Enzyme;Peptidases and inhibitors
A0A8C0NSJ2	P17275	JUNB		Transcription factor JunB		97.1182	97.1182	K09028	Transcription factors
A0A8C0NSU7	Q92747	ARPC1A		Actin-related protein 2/3 complex subunit	Actin-related protein 2/3 complex subunit 1A	100	100	K05757	Membrane trafficking;Cytoskeleton proteins
A0A8C0NSU9	Q9Y248	GINS2		DNA replication complex GINS protein PSF2		95.1351	95.1351	K10733	DNA replication proteins
A0A8C0NT14	Q8N9N8	EIF1AD		Probable RNA-binding protein EIF1AD		96.988	97.5758	K15025
A0A8C0NTR8	Q9BV38	WDR18		WD repeat-containing protein 18		90.9722	90.9722	K14829	Ribosome biogenesis
A0A8C0NU96	Q9UHV9	PFDN2		Prefoldin subunit 2		96.1039	96.1039	K09549	Chaperones and folding catalysts
A0A8C0NUF2	Q00403	GTF2B		Transcription initiation factor IIB		100	100	K03124	Transcription machinery
A0A8C0NUL5	Q9H5Q4	TFB2M		rRNA adenine N(6)-methyltransferase	Dimethyladenosine transferase 2, mitochondrial	52.1197	52.7778	K17653	Mitochondrial biogenesis
A0A8C0NUW8	P31942	HNRNPH3		Heterogeneous nuclear ribonucleoprotein H3		100	100	K12898	Spliceosome
A0A8C0NV30	O43617	TRAPPC3		Trafficking protein particle complex subunit	Trafficking protein particle complex subunit 3	98.8889	98.8889	K20302	Membrane trafficking
A0A8C0NV64	Q86XZ4	SPATS2		Spermatogenesis-associated serine-rich protein 2		91.0256	91.1927	hsa: 65244
A0A8C0NV97	Q9ULW3		ABT1	Activator of basal transcription 1		77.5974	87.8676	K14785	Ribosome biogenesis
A0A8C0NVS1	Q13155	AIMP2		Aminoacyl tRNA synthase complex-interacting multifunctional protein 2		90.3125	90.3125	K15438	Transfer RNA biogenesis
A0A8C0NVS5	Q96RE7	NACC1		Nucleus accumbens-associated protein 1		88.0995	94.1176	K10486	Ubiquitin system
A0A8C0NVT2	P35249	RFC4		AAA+ ATPase domain-containing protein	Replication factor C subunit 4	95.5923	95.5923	K10755	Chromosome and associated proteins;DNA repair and recombination proteins;DNA replication proteins
A0A8C0NW49	O94919	ENDOD1		Endonuclease domain-containing 1 protein		76.6467	76.8	K15049
A0A8C0NWE7	O75940	SMNDC1		Survival of motor neuron-related-splicing factor 30		98.3402	99.5798	K12839	Spliceosome
A0A8C0NX02	Q9BWJ5	SF3B5		Splicing factor 3B subunit 5		100	100	K12832	Spliceosome
A0A8C0NX49	O00541	PES1		Pescadillo homolog		83.0372	87.415	K14843	Ribosome biogenesis
A0A8C0NXB1	Q92945	KHSRP		KH-type splicing regulatory protein	Far upstream element-binding protein 2	99.3324	99.5984	K13210	Spliceosome;Messenger RNA biogenesis
A0A8C0NXW5	O76031	CLPX		Caseinolytic mitochondrial matrix peptidase chaperone subunit X	ATP-dependent Clp protease ATP-binding subunit clpX-like, mitochondrial	98.4202	98.4202	K03544	Chaperones and folding catalysts
A0A8C0NY04	P14314	PRKCSH		Glucosidase 2 subunit beta		89.9441	90.2804	K08288	Lectins
A0A8C0NY93	Q99622	C27H12orf57	C12orf57	Protein C10		95.8763	73.8095	hsa: 113246
A0A8C0NYE4	Q16740	CLPP		ATP-dependent Clp protease proteolytic subunit	ATP-dependent Clp protease proteolytic subunit, mitochondrial	91.2088	89.8917	K01358	Enzyme;Peptidases and inhibitors
A0A8C0NYH7	Q92979	EMG1		EMG1 N1-specific pseudouridine methyltransferase	Ribosomal RNA small subunit methyltransferase NEP1	94.2623	94.2623	K14568	Enzyme;Ribosome biogenesis
A0A8C0NZ47	Q96FQ6	S100A16		Protein S100	Protein S100-A16	90.2913	90.2913	K23768
A0A8C0NZN5	P52597	HNRNPF		Heterogeneous nuclear ribonucleoprotein F		98.0676	97.8313	K12898	Spliceosome
A0A8C0NZT7	Q9NV06	DCAF13		DDB1- and CUL4-associated factor 13		96.8539	96.8539	K11806	Ribosome biogenesis;Ubiquitin system
A0A8C0NZZ1	P07954	FH		Fumarate hydratase, mitochondrial		95.6693	95.2941	K01679	Enzyme
A0A8C0P0R4	O60684	KPNA6		Importin subunit alpha	Importin subunit alpha-7	99.8134	99.8134	K15042	Chromosome and associated proteins
A0A8C0P0X4	Q9NQ55	PPAN		Peter pan homolog	Suppressor of SWI4 1 homolog	74.502	79.0698	K14859	Ribosome biogenesis
A0A8C0P0Z5	P22695	UQCRC2		Ubiquinol-cytochrome c reductase core protein 2	Cytochrome b-c1 complex subunit 2, mitochondrial	81.8575	83.6645	K00415	Peptidases and inhibitors
A0A8C0P174	O95336	PGLS		6-phosphogluconolactonase		96.5116	96.5116	K01057	Enzyme
A0A8C0P1E8	Q15365	PCBP1		K Homology domain-containing protein	Poly(rC)-binding protein 1	99.7191	99.7191	K12889	Spliceosome;Messenger RNA biogenesis
A0A8C0P1R0	O60353	FZD6		Frizzled-6		91.8539	92.6346	K02376
A0A8C0P1R7	P49585	PCYT1A		Choline-phosphate cytidylyltransferase A		91.6011	95.0954	K00968	Enzyme
A0A8C0P1Z1	Q70UQ0	IKBIP		IKBKB interacting protein	Inhibitor of nuclear factor kappa-B kinase-interacting protein	89.0667	88.5942	hsa:121457
A0A8C0P2G7	Q9BS26	ERP44		Endoplasmic reticulum resident protein 44		82.1429	96.3054	K17264	Membrane trafficking;Exosome
A0A8C0P2M5	P29034	S100A2		Protein S100	Protein S100-A2	58.8652	84.6939	K23759
A0A8C0P2T5	P30040	ERP29		Endoplasmic reticulum resident protein 29		92.7203	92.7203	K09586	Membrane trafficking
A0A8C0P2U0	P02765	AHSG		Alpha-2-HS-glycoprotein		69.3151	68.9373	K23409	Peptidases and inhibitors
A0A8C0P2W0	Q9Y6E2		BZW2	eIF5-mimic protein 1		92.2907	100	hsa: 28969
A0A8C0P467	P53007	SLC25A1		Citrate transport protein	Tricarboxylate transport protein, mitochondrial	97.7273	96.7846	K15100	Transporters
A0A8C0P4B0	Q9HDC9	APMAP		Adipocyte plasma membrane-associated protein		86.4989	90.8654	K21407	Membrane trafficking
A0A8C0P4J4	Q8IUH3	RBM45		RNA binding motif protein 45	RNA-binding protein 45	97.6793	97.6793	K25081	Domain-containing proteins not elsewhere classified
A0A8C0P5A7	Q8TAE8	GADD45GIP1		Large ribosomal subunit protein mL64		81.2785	80.1802	hsa: 90480
A0A8C0P5C0	Q9Y282	ERGIC3		Endoplasmic reticulum-Golgi intermediate compartment protein	Endoplasmic reticulum-Golgi intermediate compartment protein 3	96.6495	97.9112	K20367	Membrane trafficking
A0A8C0P5H0	P27797	CALR		Calreticulin		94.964	94.964	K08057	Chaperones and folding catalysts;Lectins
A0A8C0P5V2	P61966	AP1S1		AP complex subunit sigma	AP-1 complex subunit sigma-1A	100	100	K12394	Membrane trafficking
A0A8C0P6B2	Q92922	SMARCC1		SWI/SNF related, matrix associated, actin dependent regulator of chromatin subfamily c member 1	SWI/SNF complex subunit SMARCC1	96.6576	96.8326	K11649	Chromosome and associated proteins;Transcription machinery
A0A8C0P6B8	Q9GZM7	TINAGL1		Tubulointerstitial nephritis antigen like 1	Tubulointerstitial nephritis antigen-like	92.5054	92.5054	hsa: 64129
A0A8C0P6D8	Q9Y3C8	UFC1		Ubiquitin-fold modifier-conjugating enzyme 1		98.8024	98.8024	K12165	Ubiquitin system
A0A8C0P6H0	Q96DI7	SNRNP40		Small nuclear ribonucleoprotein U5 subunit 40	U5 small nuclear ribonucleoprotein 40 kDa protein	98.8827	99.1597	K12857	Spliceosome
A0A8C0P6T9	Q9NWU2	GID8		GID complex subunit 8 homolog	Glucose-induced degradation protein 8 homolog	99.1228	99.1228	K23338	Ubiquitin system
A0A8C0P7E3	P62318	LOC102152884	SNRPD3	Small nuclear ribonucleoprotein Sm D3		55.2239	88.0952	K11088	Spliceosome;Messenger RNA biogenesis;DNA replication proteins
A0A8C0P7V4	P62875	POLR2L		DNA-directed RNA polymerases I, II, and III subunit RPABC5		100	100	K03007	DNA repair and recombination proteins;Transcription machinery
A0A8C0P803	P61812	TGFB2		Transforming growth factor beta	Transforming growth factor beta-2 proprotein	92.9864	99.2754	K13376
A0A8C0P827	P49756	RBM25		RNA binding motif protein 25	RNA-binding protein 25	99.8814	99.8814	K12822	Spliceosome
A0A8C0P851	Q96CN7	ISOC1		Isochorismatase domain-containing protein 1		95.0658	96.9799	hsa: 51015
A0A8C0P867	P52594	AGFG1		ArfGAP with FG repeats 1	Arf-GAP domain and FG repeat-containing protein 1	90.8638	97.331	K15044	Membrane trafficking;Messenger RNA biogenesis
A0A8C0P8R3	Q16537	PPP2R5E		Serine/threonine-protein phosphatase 2A 56 kDa regulatory subunit	Serine/threonine-protein phosphatase 2A 56 kDa regulatory subunit epsilon isoform	97.8633	98.0728	K11584	Chromosome and associated proteins;Messenger RNA biogenesis;Protein phoshphatases and associated proteins
A0A8C0P9E2	Q14289	PTK2B		non-specific protein-tyrosine kinase	Protein-tyrosine kinase 2-beta	96.2339	96.2339	K05871	Enzyme;Protein kinases
A0A8C0P9M4	P84095	RHOG		Ras homolog family member G	Rho-related GTP-binding protein RhoG	99.4764	99.4764	K07863	Exosome
A0A8C0P9Q1	Q9BVI4	NOC4L		CCAAT-binding factor domain-containing protein	Nucleolar complex protein 4 homolog	71.0392	80.814	K14771	Ribosome biogenesis
A0A8C0P9S9	Q92541	RTF1		Plus3 domain-containing protein	RNA polymerase-associated protein RTF1 homolog	98.6014	99.2958	K15178	Transcription machinery
A0A8C0P9T5	P13984	GTF2F2		General transcription factor IIF subunit 2		97.992	97.992	K03139	Transcription machinery
A0A8C0P9V7	Q96T88	UHRF1		E3 ubiquitin-protein ligase UHRF	E3 ubiquitin-protein ligase UHRF1	80.2286	88.5246	K10638	Enzyme;Chromosome and associated proteins;Ubiquitin system
A0A8C0PAG5	O75884	RBBP9		RB binding protein 9, serine hydrolase	Serine hydrolase RBBP9	64.6766	69.8925	K07002
A0A8C0PB20	Q9HCY8	S100A14		S100 calcium binding protein A14	Protein S100-A14	58.4906	59.6154	K23767
A0A8C0PBA6	Q92598	HSPH1		Heat shock protein 105 kDa		95.5762	95.6876	K09485	Chaperones and folding catalysts
A0A8C0PBK4	Q15773	MLF2		Myeloid leukemia factor 2		97.9757	97.5806	hsa: 8079
A0A8C0PCU5	Q15424	SAFB		Scaffold attachment factor B	Scaffold attachment factor B1	80.4695	93.4569	K25092	Spliceosome
A0A8C0PDE6	Q13242	SRSF9		RRM domain-containing protein	Serine/arginine-rich splicing factor 9	99.095	99.095	K21123	Spliceosome
A0A8C0PDR4	Q5T200	ZC3H13		C3H1-type domain-containing protein	Zinc finger CCCH domain-containing protein 13	92.5684	93.2894	K22909	Messenger RNA biogenesis
A0A8C0PFI9	Q9NV88	INTS9		Integrator complex subunit 9		97.8723	97.8723	K13146	Spliceosome
A0A8C0PG42	Q6KB66	KRT80		Keratin 80	Keratin, type II cytoskeletal 80	63.7523	77.4336	K07605	Exosome;Cytoskeleton proteins
A0A8C0PGH0	P07737	PFN1		Profilin	Profilin-1	95	95	K05759	Membrane trafficking;Exosome;Cytoskeleton proteins
A0A8C0PGI9	Q9Y5B8	NME7		Nucleoside diphosphate kinase homolog 7	Nucleoside diphosphate kinase 7	94.1489	94.1489	K00940	Enzyme;Membrane trafficking
A0A8C0PGY5	Q9HCS7	XAB2		XPA binding protein 2	Pre-mRNA-splicing factor SYF1	98.8304	98.8304	K12867	Spliceosome;Messenger RNA biogenesis
A0A8C0PH91	Q02790	FKBP4		peptidylprolyl isomerase	Peptidyl-prolyl cis-trans isomerase FKBP4	91.5033	91.5033	K09571	Enzyme;Chaperones and folding catalysts
A0A8C0PHP6	Q14315	FLNC		Filamin-C		98.1985	98.0183	K27393	Cytoskeleton proteins
A0A8C0PHQ0	Q96DZ1	ERLEC1		Endoplasmic reticulum lectin	Endoplasmic reticulum lectin 1	93.1864	96.2733	K14008
A0A8C0PHY2	O14908	GIPC1		GIPC PDZ domain containing family member 1	PDZ domain-containing protein GIPC1	71.875	96.6967	K20056	Membrane trafficking
A0A8C0PHY3	Q14192	FHL2		Four and a half LIM domains protein 2		92.8315	92.8315	K14380	Domain-containing proteins not elsewhere classified
A0A8C0PIS1	Q15126	PMVK		Phosphomevalonate kinase		87.5	87.5	K13273	Enzyme
A0A8C0PIY3	P20700	LMNB1		Lamin-B1		97.7816	97.7816	K07611	Cytoskeleton proteins
A0A8C0PIY7	Q9HCN8	SDF2L1		Stromal cell-derived factor 2-like protein 1		64.6341	95.9276	hsa: 23753
A0A8C0PJ62	Q92572	AP3S1		Adaptor related protein complex 3 subunit sigma 1	AP-3 complex subunit sigma-1	100	100	K12399	Membrane trafficking
A0A8C0PJK5	Q05048	CSTF1		Cleavage stimulation factor 50 kDa subunit	Cleavage stimulation factor subunit 1	99.768	99.768	K14406	Messenger RNA biogenesis
A0A8C0PKM7	Q04917	YWHAH		Tyrosine 3-monooxygenase/tryptophan 5-monooxygenase activation protein eta	14-3-3 protein eta	56.4677	92.2764	K16198	Exosome;DNA repair and recombination proteins;Protein phoshphatases and associated proteins
A0A8C0PKV5	Q8IZ73	RPUSD2		RNA pseudouridine synthase domain containing 2	Pseudouridylate synthase RPUSD2	83.5145	84.5872	hsa: 27079
A0A8C0PKY3	P52815	MRPL12		Mitochondrial ribosomal protein L12	Large ribosomal subunit protein bL12m	87.8788	87.8788	K02935	Ribosome
A0A8C0PM69	P10155	RO60		Ro60, Y RNA binding protein	RNA-binding protein RO60	94.7559	97.3978	K11089
A0A8C0PMC8	Q9NPD3	EXOSC4		Exosome component 4	Exosome complex component RRP41	97.9592	97.9592	K11600	Messenger RNA biogenesis
A0A8C0PMT6	Q8NFF5	FLAD1		FAD synthase		91.8367	76.661	K00953	Enzyme
A0A8C0PN05	P49902	NT5C2		Cytosolic purine 5'-nucleotidase		97.891	99.287	K01081	Enzyme
A0A8C0PND9	Q86SX6	GLRX5		Glutaredoxin domain-containing protein	Glutaredoxin-related protein 5, mitochondrial	77.4194	91.7197	K07390	Mitochondrial biogenesis;Chaperones and folding catalysts
A0A8C0PP51	P04080	CSTB		Cystatin domain-containing protein	Cystatin-B	81.6327	81.6327	K13907	Exosome;Peptidases and inhibitors
A0A8C0PP61	O43242	PSMD3		Proteasome 26S subunit, non-ATPase 3	26S proteasome non-ATPase regulatory subunit 3	98.1273	98.1273	K03033	Proteasome
A0A8C0PPG2	Q13867	BLMH		Bleomycin hydrolase		95.1648	95.1648	K01372	Enzyme;Peptidases and inhibitors
A0A8C0PPX6	P04062	GBA1		Glucosylceramidase	Lysosomal acid glucosylceramidase	90.4851	90.4851	K01201	Enzyme
A0A8C0PPZ1	Q9UBX3	SLC25A10		Solute carrier family 25 member 10	Mitochondrial dicarboxylate carrier	87.5421	90.5923	K13577	Transporters
A0A8C0PQP0	P36952	SERPINB5		Serpin B5		89.9225	92.8	K10139	Peptidases and inhibitors
A0A8C0PRU0	Q9P258	RCC2		Regulator of chromosome condensation 2	Protein RCC2	98.659	98.659	hsa: 55920
A0A8C0PRW0	Q96G03	PGM2		Phosphoglucomutase 2	Phosphopentomutase	92.5203	92.9739	K15779	Enzyme
A0A8C0PS52	Q96SZ5	ADO		2-aminoethanethiol dioxygenase		92.963	92.963	K10712	Enzyme
A0A8C0PT10	P15104	GLUL		Glutamine synthetase		87.8935	97.319	K01915	Enzyme;Exosome
A0A8C0PT23	P62314	SNRPD1		Small nuclear ribonucleoprotein Sm D1		75.7812	81.5126	K11087	Spliceosome;DNA replication proteins
A0A8C0PT64	Q562R1	ACTBL2		Beta-actin-like protein 2		96.8085	96.8085	hsa: 345651
A0A8C0PTU0	Q9NRY2	INIP		SOSS complex subunit C		99.0385	99.0385	hsa: 58493
A0A8C0PVE4	P47224	RABIF		RAB interacting factor	Guanine nucleotide exchange factor MSS4	95.1219	95.1219	K19952	Membrane trafficking
A0A8C0PW06	Q9H974	QTRT2		Queuine tRNA-ribosyltransferase accessory subunit 2		87.5289	91.3253	K15407	Transfer RNA biogenesis
A0A8C0PXH8	Q13426	XRCC4		X-ray repair cross complementing 4	DNA repair protein XRCC4	70.088	71.5569	K10886	DNA repair and recombination proteins
A0A8C0PXP5	Q9H583	HEATR1		HEAT repeat-containing protein 1		89.8645	89.7388	K14550	Ribosome biogenesis
A0A8C0PXV1	Q9Y266	NUDC		Nuclear migration protein nudC		95.7831	96.0725	K25866	Chromosome and associated proteins
A0A8C0PYS4	Q9BW91	NUDT9		Nudix hydrolase 9	ADP-ribose pyrophosphatase, mitochondrial	87.1429	87.1429	K13988	Enzyme
A0A8C0Q002	O43264	ZW10		Zw10 kinetochore protein	Centromere/kinetochore protein zw10 homolog	92.4262	92.4262	K11578	Membrane trafficking;Chromosome and associated proteins
A0A8C0Q1A4	P51970	NDUFA8		NADH dehydrogenase [ubiquinone] 1 alpha subcomplex subunit 8		87.7907	87.7907	K03952
A0A8C0Q244	P05120	SERPINB2		Serpin family B member 2	Plasminogen activator inhibitor 2	77.8846	78.0723	K19821	Peptidases and inhibitors
A0A8C0Q308	Q9BUE0	MED18		Mediator of RNA polymerase II transcription subunit 18		99.0385	99.0385	K15135	Transcription machinery
A0A8C0Q3E4	O75843	AP1G2		AP-1 complex subunit gamma	AP-1 complex subunit gamma-like 2	90.216	90.4459	K12391	Membrane trafficking
A0A8C0Q3H0	Q12962	TAF10		Transcription initiation factor TFIID subunit 10		97.2477	97.2477	K03134	Chromosome and associated proteins;Transcription machinery
A0A8C0Q3S7	P82979	SARNP		SAP domain-containing ribonucleoprotein		91.0377	91.9048	K18732	Messenger RNA biogenesis
A0A8C0Q3Z4	P55209	NAP1L1		Nucleosome assembly protein 1-like 1		79.4183	90.7928	K11279	Chromosome and associated proteins
A0A8C0Q4T7	O75390	CS		Citrate synthase	Citrate synthase, mitochondrial	85.5788	96.7811	K01647	Enzyme
A0A8C0Q503	Q8WXX5	DNAJC9		J domain-containing protein	DnaJ homolog subfamily C member 9	93.4363	93.0769	K09529	Chaperones and folding catalysts
A0A8C0Q547	O75223	GGCT		gamma-glutamylcyclotransferase		86.1702	86.1702	K00682	Enzyme
A0A8C0Q5G0	Q9H832	UBE2Z		Ubiquitin-conjugating enzyme E2 Z		99.1525	99.1525	K10585	Enzyme;Ubiquitin system
A0A8C0Q5M2	Q9H6Y2	WDR55		WD repeat-containing protein 55		91.4286	91.906	K24750	Domain-containing proteins not elsewhere classified
A0A8C0Q6K4	Q14677	CLINT1		Clathrin interactor 1		94.7123	97.44	K24721	Membrane trafficking
A0A8C0Q6S0	P61020	RAB5B		small monomeric GTPase	Ras-related protein Rab-5B	98.1481	98.6047	K07888	Membrane trafficking;Exosome
A0A8C0Q768	Q96MX6	DNAAF10		Nuclear nucleic acid-binding protein C1D	Dynein axonemal assembly factor 10	96.3585	96.3585	K24761	Cytoskeleton proteins;Cilium and associated proteins
A0A8C0Q7A8	Q92878	RAD50		RAD50 double strand break repair protein	DNA repair protein RAD50	96.189	96.189	K10866	DNA repair and recombination proteins;DNA replication proteins
A0A8C0Q7M4	Q01167	FOXK2		Forkhead box protein K2		93.465	93.1818	K09404	Chromosome and associated proteins;Transcription factors
A0A8C0Q7X7	Q96Q11	TRNT1		tRNA nucleotidyl transferase 1	CCA tRNA nucleotidyltransferase 1, mitochondrial	91.7431	92.1659	K00974	Enzyme;Transfer RNA biogenesis
A0A8C0Q807	O14656	TOR1A		Torsin	Torsin-1A	93.3735	93.3735	K22990	Membrane trafficking;Chaperones and folding catalysts
A0A8C0Q872	Q15942	ZYX		Zyxin		73.4797	76.049	K06273
A0A8C0Q875	P27694	RPA1		Replication protein A subunit	Replication protein A 70 kDa DNA-binding subunit	86.5385	87.6623	K07466	DNA repair and recombination proteins;DNA replication proteins;Transcription factors
A0A8C0Q8J2	P62829	RPL23		Large ribosomal subunit protein uL14		100	100	K02894	Ribosome
A0A8C0Q8W8	Q6ISB3	GRHL2		Grainyhead like transcription factor 2	Grainyhead-like protein 2 homolog	95.2607	96.48	K09275	Transcription factors
A0A8C0Q8X0	Q9UQ80	PA2G4		Proliferation-associated 2G4	Proliferation-associated protein 2G4	99.7462	99.7462	K26736	Ribosome biogenesis
A0A8C0Q9D6	Q96JJ3	ELMO2		ELMO domain-containing protein	Engulfment and cell motility protein 2	97.8142	99.4444	K18985
A0A8C0QA67	O00303	EIF3F		Eukaryotic translation initiation factor 3 subunit F		90.5149	93.5574	K03249	Exosome;Translation factors
A0A8C0QBB4	P53384	NUBP1		Cytosolic Fe-S cluster assembly factor NUBP1		90.9375	90.9375	hsa: 4682
A0A8C0QD92	P48637	GSS		Glutathione synthetase		91.9831	91.9831	K21456	Enzyme;Exosome
A0A8C0QDA8	P50416	CPT1A		Carnitine palmitoyltransferase 1A	Carnitine O-palmitoyltransferase 1, liver isoform	91.2031	91.2031	K08765	Enzyme;Mitochondrial biogenesis
A0A8C0QE10	Q9H444	CHMP4B		Charged multivesicular body protein 4B		97.7679	97.7679	K12194	Membrane trafficking;Exosome
A0A8C0QE86	P49721	PSMB2		Proteasome subunit beta	Proteasome subunit beta type-2	99.005	99.005	K02734	Enzyme;Peptidases and inhibitors;Proteasome
A0A8C0QEV6	Q96J02	ITCH		E3 ubiquitin-protein ligase	E3 ubiquitin-protein ligase Itchy homolog	97.3318	97.3318	K05632	Enzyme;Membrane trafficking;Ubiquitin system
A0A8C0QFD6	Q16531	DDB1		DNA damage-binding protein 1		99.9123	99.9123	K10610	Ubiquitin system;DNA repair and recombination proteins
A0A8C0QFE7	Q13610	PWP1		PWP1 homolog, endonuclein	Periodic tryptophan protein 1 homolog	98.8	98.6028	K14791	Ribosome biogenesis
A0A8C0QFQ6	P12004	PCNA		Proliferating cell nuclear antigen		99.6169	99.6169	K04802	DNA repair and recombination proteins;DNA replication proteins
A0A8C0QGX1	Q9Y3B4	SF3B6		Splicing factor 3b subunit 6		100	100	K12833	Spliceosome
A0A8C0QHX9	P35606	COPB2		Coatomer subunit beta'		99.0066	99.0066	K17302	Membrane trafficking;Exosome
A0A8C0QIF7	Q8N2W9	PIAS4		Protein inhibitor of activated STAT 4	E3 SUMO-protein ligase PIAS4	82.735	94.902	K16065	Enzyme;Ubiquitin system
A0A8C0QJD2	P82675	MRPS5		Small ribosomal subunit protein uS5m		84.8837	84.8837	K02988	Ribosome
A0A8C0QMQ4	O75934	BCAS2		Pre-mRNA-splicing factor SPF27		98.6667	98.6667	K12861	Spliceosome;DNA repair and recombination proteins
A0A8C0QP45	O14949	UQCRQ		Cytochrome b-c1 complex subunit 8		81.7073	81.7073	K00418
A0A8C0QPC2	P30049	ATP5F1D		ATP synthase F1 subunit delta	ATP synthase subunit delta, mitochondrial	89.2857	89.2857	K02134
A0A8C0QQV5	Q9UHG3	PCYOX1		Prenylcysteine oxidase 1		85.3465	85.3465	K05906	Enzyme
A0A8C0QRK5	P25787	PSMA2		Proteasome subunit alpha type	Proteasome subunit alpha type-2	100	100	K02726	Enzyme;Peptidases and inhibitors;Proteasome
A0A8C0R9T3	O43633	CHMP2A		Charged multivesicular body protein 2a		99.0991	99.0991	K12191	Membrane trafficking;Exosome
A0A8C0R9T4	Q9Y5J7	TIMM9		Mitochondrial import inner membrane translocase subunit	Mitochondrial import inner membrane translocase subunit Tim9	98.8764	98.8764	K17777	Mitochondrial biogenesis;Transporters
A0A8C0RAK1	P61353	RPL27		60S ribosomal protein L27	Large ribosomal subunit protein eL27	100	100	K02901	Ribosome
A0A8C0RAP2	P83916	CBX1		Chromobox 1	Chromobox protein homolog 1	100	100	K11585	Chromosome and associated proteins
A0A8C0RAS4	O96008	TOMM40		Mitochondrial import receptor subunit TOM40 homolog		96.3989	96.3989	K11518	Mitochondrial biogenesis;Transporters
A0A8C0RB55	P17028	ZNF24		Zinc finger protein 24		97.5543	97.5543	K09230	Transcription factors
A0A8C0RBN8	Q9H2W6	MRPL46		Large ribosomal subunit protein mL46		79.2642	84.9462	K17427	Ribosome
A0A8C0RC43	Q06265	EXOSC9		Exosome complex component RRP45		95.0355	91.5718	K03678	Messenger RNA biogenesis
A0A8C0RC75	Q9NP61	ARFGAP3		ADP-ribosylation factor GTPase-activating protein 3		68.6099	88.9535	K12493	Membrane trafficking
A0A8C0RD13	Q86U44	METTL3		mRNA m(6)A methyltransferase	N6-adenosine-methyltransferase catalytic subunit	98.4483	98.4483	K05925	Enzyme;Messenger RNA biogenesis
A0A8C0RD96	Q9H4H8	FAM83D		Family with sequence similarity 83 member D	Protein FAM83D	78.7671	78.6325	K16805	Chromosome and associated proteins
A0A8C0RE17	Q9BU89	DOHH		Deoxyhypusine hydroxylase		86.4686	86.755	K06072	Enzyme
A0A8C0REJ2	Q6PL18	ATAD2		ATPase family AAA domain containing 2	ATPase family AAA domain-containing protein 2	92.4253	91.295	K22531
A0A8C0RF14	O43159	RRP8		Ribosomal RNA-processing protein 8		81.7181	81.3596	K14850	Enzyme;Ribosome biogenesis
A0A8C0RFL6	Q9UKD2	MRTO4		Ribosome assembly factor mrt4	mRNA turnover protein 4 homolog	93.75	94.1423	K14815	Ribosome biogenesis
A0A8C0RFV7	P55795	HNRNPH2		Heterogeneous nuclear ribonucleoprotein H2		99.5546	99.5546	K12898	Spliceosome
A0A8C0RHA9	Q9H5V8	CDCP1		CUB domain containing protein 1	CUB domain-containing protein 1	85.2163	84.8086	K06732	CD molecules
A0A8C0RHL7	Q86Y82	STX12		Syntaxin 12	Syntaxin-12	95.2555	94.5652	K13813	Membrane trafficking;Exosome
A0A8C0RI14	Q00059	TFAM		Transcription factor A, mitochondrial		71.5447	71.5447	K11830	Mitochondrial biogenesis
A0A8C0RI85	P63220	RPS21		40S ribosomal protein S21	Small ribosomal subunit protein eS21	100	100	K02971	Ribosome
A0A8C0RIU2	Q8NFV4	ABHD11		sn-1-specific diacylglycerol lipase ABHD11		69.9708	78.4314	K13703	Peptidases and inhibitors
A0A8C0RIZ9	P15586	GNS		N-acetylglucosamine-6-sulfatase		94.2342	94.7464	K01137	Enzyme
A0A8C0RJ46	Q15785	TOMM34		Translocase of outer mitochondrial membrane 34	Mitochondrial import receptor subunit TOM34	83.1715	83.1715	K17766	Mitochondrial biogenesis
A0A8C0RJE5	P08754	GNAI3		Guanine nucleotide-binding protein G(i) subunit alpha-3		98.8701	98.8701	K04630	Exosome
A0A8C0RJF2	Q96A33	CCDC47		PAT complex subunit CCDC47		98.7578	98.7578	K24962	Membrane trafficking;Chaperones and folding catalysts
A0A8C0RJM3	Q15007	WTAP		Pre-mRNA-splicing regulator WTAP		96.2121	96.2121	K22824	Messenger RNA biogenesis
A0A8C0RLC5	O94760	DDAH1		Dimethylargininase	N(G),N(G)-dimethylarginine dimethylaminohydrolase 1	94.0351	94.0351	K01482	Enzyme;Exosome
A0A8C0RLR6	P49755	TMED10		Transmembrane emp24 domain-containing protein 10		94.9772	94.9772	K20352	Membrane trafficking
A0A8C0RLV6	O15226	NKRF		NF-kappa-B-repressing factor		97.5765	97.7011	K26458	Transcription factors
A0A8C0RLY3	P05198	EIF2S1		Eukaryotic translation initiation factor 2 subunit 1		99.0476	99.0476	K03237	Membrane trafficking;Translation factors
A0A8C0RMV5	Q14011	CIRBP		Cold-inducible RNA-binding protein		95.3488	55.2189	K13195	Spliceosome
A0A8C0RNV5	O75306	NDUFS2		NADH dehydrogenase [ubiquinone] iron-sulfur protein 2, mitochondrial		94.1685	94.1685	K03935	Enzyme
A0A8C0RNZ0	P23921	RRM1		Ribonucleoside-diphosphate reductase	Ribonucleoside-diphosphate reductase large subunit	97.9798	97.9798	K10807	Enzyme;DNA repair and recombination proteins
A0A8C0RP10	O43681	GET3		Guided entry of tail-anchored proteins factor 3, ATPase	ATPase GET3	100	100	K01551	Enzyme;Membrane trafficking;Transporters
A0A8C0RQH3	Q9UMS4	PRPF19		Pre-mRNA-processing factor 19		95.2107	98.6111	K10599	Enzyme;Spliceosome;Ubiquitin system;DNA repair and recombination proteins
A0A8C0RQS2	Q9BUQ8	DDX23		RNA helicase	Probable ATP-dependent RNA helicase DDX23	99.1505	99.6341	K12858	Enzyme;Spliceosome
A0A8C0RR06	P11234	RALB		Ras-related protein Ral-B		98.0583	98.0583	K07835	Membrane trafficking
A0A8C0RR55	Q9Y606	PUS1		Pseudouridine synthase 1	Pseudouridylate synthase 1 homolog	82.1608	76.5808	K06173	Enzyme;Transfer RNA biogenesis
A0A8C0RRS9	Q9BRZ2	TRIM56		RING-type E3 ubiquitin transferase	E3 ubiquitin-protein ligase TRIM56	88.9754	90.8609	K12026	Enzyme;Ubiquitin system
A0A8C0RSF4	Q9NRF9	POLE3		DNA polymerase epsilon subunit 3		77.5401	98.6395	K02326	Enzyme;Chromosome and associated proteins;DNA repair and recombination proteins;DNA replication proteins
A0A8C0RSH2	O43665	RGS10		Regulator of G-protein signaling 10		96.1326	96.1326	K16449
A0A8C0RSM9	Q14152	EIF3A		Eukaryotic translation initiation factor 3 subunit A		96.365	93.9942	K03254	Translation factors
A0A8C0RT68	Q9GZZ1	NAA50		N-alpha-acetyltransferase 50		100	100	K20793	Enzyme;Chromosome and associated proteins
A0A8C0RTW7	P45973	CBX5		Chromo domain-containing protein	Chromobox protein homolog 5	99.4764	99.4764	K11587	Chromosome and associated proteins
A0A8C0RUJ6	Q9UMX5	NENF		Neudesin neurotrophic factor	Neudesin	88.5057	89.5349	K25689
A0A8C0RVV2	Q9HC38	GLOD4		Glyoxalase domain containing 4	Glyoxalase domain-containing protein 4	91.9463	91.9463	hsa: 51031
A0A8C0RW57	P61081	UBE2M		E2 NEDD8-conjugating enzyme	NEDD8-conjugating enzyme Ubc12	100	100	K10579	Enzyme;Ubiquitin system
A0A8C0RW74	Q13907	IDI1		isopentenyl-diphosphate Delta-isomerase	Isopentenyl-diphosphate Delta-isomerase 1	88.5463	70.7747	K01823	Enzyme
A0A8C0RWE6	Q00169	PITPNA		Phosphatidylinositol transfer protein alpha isoform		99.6296	99.6296	hsa: 5306
A0A8C0RWH2	Q9NZ32	ACTR10		Actin-related protein 10		96.1722	96.4029	K16576	Chromosome and associated proteins;Cytoskeleton proteins
A0A8C0RXA4	Q96P70	IPO9		Importin-9		99.7118	99.7118	K20224	Ribosome biogenesis
A0A8C0RXV8	Q92804	TAF15		TATA-box binding protein associated factor 15	TATA-binding protein-associated factor 2N	92.228	90.2027	K14651	Messenger RNA biogenesis;Transcription machinery
A0A8C0RYN1	Q9Y2V2	CARHSP1		CSD domain-containing protein	Calcium-regulated heat-stable protein 1	96.5986	96.5986	hsa: 23589
A0A8C0RZR3	O95302	FKBP9		peptidylprolyl isomerase	Peptidyl-prolyl cis-trans isomerase FKBP9	96.6783	97.0175	K09575	Enzyme;Chaperones and folding catalysts
A0A8C0S062	P19623	SRM		Spermidine synthase		92.4342	93.0464	K00797	Enzyme
A0A8C0S0J3	Q14204	DYNC1H1		Dynein heavy chain, cytosolic	Cytoplasmic dynein 1 heavy chain 1	99.2253	99.2467	K10413	Chromosome and associated proteins;Exosome;Cytoskeleton proteins
A0A8C0S0Q8	P50583	NUDT2		Bis(5'-nucleosyl)-tetraphosphatase [asymmetrical]		90.4762	90.4762	K01518	Enzyme
A0A8C0S1V9	Q9NPA8	ENY2		Transcription and mRNA export factor ENY2		100	100	K11368	Chromosome and associated proteins;Messenger RNA biogenesis;Transcription machinery
A0A8C0S1X7	Q10472	GALNT1		Polypeptide N-acetylgalactosaminyltransferase	Polypeptide N-acetylgalactosaminyltransferase 1	99.4633	99.4633	K00710	Enzyme;Glycosyltransferase
A0A8C0S297	O95373	IPO7		Importin-7		100	100	K20223	Ribosome biogenesis
A0A8C0S3M2	P07741	APRT		Adenine phosphoribosyltransferase		85.5556	85.5556	K00759	Enzyme;Exosome
A0A8C0S442	Q96CT7	CCDC124		Coiled-coil domain-containing protein 124		95.0673	95.0673	hsa: 115098
A0A8C0S468	Q9BTT0	ANP32E		Acidic leucine-rich nuclear phosphoprotein 32 family member	Acidic leucine-rich nuclear phosphoprotein 32 family member E	84.7222	91.0448	K18648	Chromosome and associated proteins
A0A8C0S5T0	P49821	NDUFV1		NADH dehydrogenase [ubiquinone] flavoprotein 1, mitochondrial		97.1983	97.1983	K03942	Enzyme
A0A8C0S671	P14866	HNRNPL		Heterogeneous nuclear ribonucleoprotein L		100	99.8302	K13159	Spliceosome
A0A8C0S6E6	Q9HAB8	PPCS		Phosphopantothenoylcysteine synthetase	Phosphopantothenate--cysteine ligase	86.1736	86.1736	K01922	Enzyme
A0A8C0S8A4	O00170	AIP		peptidylprolyl isomerase	AH receptor-interacting protein	94.8485	94.8485	K17767	Mitochondrial biogenesis
A0A8C0S9G5	Q9H4A5	GOLPH3L		Golgi phosphoprotein 3-like		95.4386	95.4386	K15620	Membrane trafficking
A0A8C0S9W0	P29372	MPG		DNA-3-methyladenine glycosylase II	DNA-3-methyladenine glycosylase	81.295	77.1331	K03652	Enzyme;DNA repair and recombination proteins
A0A8C0SB69	Q9H3P7	ACBD3		Acyl-CoA binding domain containing 3	Golgi resident protein GCP60	96.4015	96.4015	K23935
A0A8C0SB92	Q8IV08	PLD3		5'-3' exonuclease PLD3		97.3469	97.3469	K16860	Enzyme;Membrane trafficking
A0A8C0SBA6	P17812	CTPS1		CTP synthase	CTP synthase 1	97.9695	97.9695	K01937	Enzyme
A0A8C0SCG2	Q9H223	EHD4		EH domain containing 4	EH domain-containing protein 4	98.5213	98.5213	K12477	Membrane trafficking;Exosome
A0A8C0SD59	Q15836	VAMP3		Vesicle-associated membrane protein 3		59.3103	86	K13505	Membrane trafficking
A0A8C0SE53	O60927	PPP1R11		E3 ubiquitin-protein ligase PPP1R11		68.5714	95.2381	K17553	Protein phoshphatases and associated proteins
A0A8C0SEN7	Q9C005	DPY30		Protein dpy-30 homolog		98.9899	98.9899	K14965	Chromosome and associated proteins
A0A8C0SF97	Q9BX68	HINT2		Histidine triad nucleotide binding protein 2	Adenosine 5'-monophosphoramidase HINT2	89.5705	89.5705	K02503	Exosome;Transfer RNA biogenesis
A0A8C0SGM8	Q07352	ZFP36L1		mRNA decay activator protein ZFP36	mRNA decay activator protein ZFP36L1	98.2249	98.2249	K18753	Messenger RNA biogenesis
A0A8C0SIP4	Q8WZA9	IRGQ		Immunity related GTPase Q	Immunity-related GTPase family Q protein	84.019	85.2327	hsa: 126298
A0A8C0SIU9	P10768	ESD		S-formylglutathione hydrolase		96.0993	96.0993	K01070	Enzyme
A0A8C0SJF8	P49770	EIF2B2		Translation initiation factor eIF2B subunit beta		94.8718	94.8718	K03754	Translation factors
A0A8C0SJL5	O14618	CCS		Superoxide dismutase copper chaperone	Copper chaperone for superoxide dismutase	89.0511	89.0511	K04569
A0A8C0SKE8	Q96A49	SYAP1		Synapse-associated protein 1		89.1061	90.625	hsa: 94056
A0A8C0SKF2	Q8WUA2	PPIL4		Peptidyl-prolyl cis-trans isomerase	Peptidyl-prolyl cis-trans isomerase-like 4	91.8251	98.1707	K12735	Enzyme;Spliceosome;Chaperones and folding catalysts
A0A8C0SKX6	Q92575	UBXN4		UBX domain-containing protein 4		91.716	91.5354	K24348
A0A8C0SKZ4	Q9Y5B9	SUPT16H		FACT complex subunit	FACT complex subunit SPT16	99.809	99.809	K25639	Chromosome and associated proteins
A0A8C0SL13	O14933	UBE2L6		Ubiquitin conjugating enzyme E2 L6	Ubiquitin/ISG15-conjugating enzyme E2 L6	70.5882	70.5882	K04553	Enzyme;Ubiquitin system
A0A8C0SL37	Q13243	SRSF5		Serine and arginine rich splicing factor 5	Serine/arginine-rich splicing factor 5	99.2647	99.2647	K12893	Spliceosome
A0A8C0SLB3	P40306	PSMB10		Proteasome subunit beta	Proteasome subunit beta type-10	86.4469	86.4469	K02733	Enzyme;Peptidases and inhibitors;Proteasome
A0A8C0SLN6	O75531	BANF1		Barrier-to-autointegration factor		100	100	K21870	Chromosome and associated proteins
A0A8C0SLX4	Q9NRX4	PHPT1		14 kDa phosphohistidine phosphatase		86.4	86.4	K01112	Enzyme
A0A8C0SLY3	P30519	HMOX2		heme oxygenase (biliverdin-producing)	Heme oxygenase 2	90.1899	90.1899	K21418	Enzyme
A0A8C0SM51	Q96CM8	CACNA1G	ACSF2	Medium-chain acyl-CoA ligase ACSF2, mitochondrial		79.0924	79.3496	K23617	Enzyme;Lipid biosynthesis proteins
A0A8C0SMD9	O43813	LANCL1		Glutathione S-transferase LANCL1		91.2281	91.2281	K25210	Enzyme
A0A8C0SME3	Q8TD19	NEK9		non-specific serine/threonine protein kinase	Serine/threonine-protein kinase Nek9	97.1311	96.8335	K20878	Enzyme;Chromosome and associated proteins;Protein kinases
A0A8C0SMH6	Q8NFH3	NUP43		Nucleoporin 43	Nucleoporin Nup43	95	95	K14305	Chromosome and associated proteins;Messenger RNA biogenesis
A0A8C0SMR0	P62072	TIMM10		Mitochondrial import inner membrane translocase subunit	Mitochondrial import inner membrane translocase subunit Tim10	98.8889	98.8889	K17778	Mitochondrial biogenesis;Transporters
A0A8C0SN10	P00387	CYB5R3		NADH-cytochrome b5 reductase	NADH-cytochrome b5 reductase 3	92.691	92.691	K00326	Enzyme
A0A8C0SNP1	Q9H7Z7	PTGES2		Prostaglandin E synthase 2		89.2473	88.0637	K05309	Enzyme
A0A8C0SNT7	Q14764	MVP		Major vault protein		91.3483	91.0414	K17266	Exosome
A0A8C0SP36	Q96BW1	UPRT		Uracil phosphoribosyltransferase homolog		85.6678	85.1133	hsa: 139596
A0A8C0SQP4	O75439	PMPCB		Mitochondrial-processing peptidase subunit beta		87.9142	92.229	K17732	Enzyme;Mitochondrial biogenesis;Peptidases and inhibitors
A0A8C0SRC2	P40938	RFC3		Replication factor C subunit 3		99.7191	99.7191	K10756	Chromosome and associated proteins;DNA repair and recombination proteins;DNA replication proteins
A0A8C0SSA6	Q9UBQ7	GRHPR		Glyoxylate and hydroxypyruvate reductase	Glyoxylate reductase/hydroxypyruvate reductase	93.2927	93.2927	K00049	Enzyme
A0A8C0STU7	Q9BYN8	MRPS26		Small ribosomal subunit protein mS26		73.7864	74.1463	K17405	Ribosome
A0A8C0SVL2	Q9BY42	RTF2		Replication termination factor 2		73.3333	86.2745	K25186	DNA replication proteins
A0A8C0SVR8	Q8WXF1	PSPC1		Paraspeckle component 1		99.2322	98.8528	K24993	Spliceosome
A0A8C0SWJ4	P60510	PPP4C		Serine/threonine-protein phosphatase	Serine/threonine-protein phosphatase 4 catalytic subunit	100	100	K15423	Enzyme;DNA repair and recombination proteins;Protein phoshphatases and associated proteins
A0A8C0SWL5	P17568	NDUFB7		NADH dehydrogenase [ubiquinone] 1 beta subcomplex subunit 7		80.292	80.292	K03963
A0A8C0SWZ8	P40855	PEX19		Peroxisomal biogenesis factor 19		96.3211	96.3211	K13337
A0A8C0SX57	Q96CS3	FAF2		Fas associated factor family member 2	FAS-associated factor 2	99.7753	99.7753	K18726	Messenger RNA biogenesis
A0A8C0SXT4	Q96EY7	PTCD3		Small ribosomal subunit protein mS39		81.3683	81.1321	K17659	Mitochondrial biogenesis
A0A8C0SXV3	P35270	SPR		Sepiapterin reductase		81.6479	83.5249	K00072	Enzyme;Exosome
A0A8C0SY08	Q9Y5P6	GMPPB		mannose-1-phosphate guanylyltransferase	Mannose-1-phosphate guanyltransferase beta	97.5	97.5	K00966	Enzyme
A0A8C0SY13	P61225	RAP2B		Ras-related protein Rap-2	Ras-related protein Rap-2b	100	100	K07838	Exosome
A0A8C0SYD2	Q8IY81	FTSJ3		pre-rRNA processing protein FTSJ3	pre-rRNA 2'-O-ribose RNA methyltransferase FTSJ3	89.4484	88.0756	K14857	Ribosome biogenesis
A0A8C0SZC4	P07738	BPGM		Phosphoglycerate mutase	Bisphosphoglycerate mutase	77.0073	81.4672	K01837	Enzyme
A0A8C0SZN9	Q3MHD2	LSM12		LSM12 homolog	Protein LSM12	100	100	K23643
A0A8C0T0T5	Q9H1E3	NUCKS1		Nuclear casein kinase and cyclin dependent kinase substrate 1	Nuclear ubiquitous casein and cyclin-dependent kinase substrate 1	78.2787	78.6008	hsa: 64710
A0A8C0T0U5	O14896	IRF6		Interferon regulatory factor 6		98.9177	97.8587	K10154	Exosome;Transcription factors
A0A8C0T1B7	Q92688	ANP32B		Acidic leucine-rich nuclear phosphoprotein 32 family member	Acidic leucine-rich nuclear phosphoprotein 32 family member B	77.6557	84.4622	K18647	Exosome;Messenger RNA biogenesis
A0A8C0T1C8	Q9UBU9	NXF1		Nuclear RNA export factor 1		91.6006	93.3764	K14284	Messenger RNA biogenesis;Ribosome biogenesis
A0A8C0T1S2	Q13740	ALCAM		CD166 antigen		95.5403	95.5403	K06547	CD molecules
A0A8C0T1X8	P36954	POLR2I		DNA-directed RNA polymerase subunit	DNA-directed RNA polymerase II subunit RPB9	66.6667	86.4	K03017	DNA repair and recombination proteins;Transcription machinery
A0A8C0T297	P51572	BCAP31		B-cell receptor-associated protein	B-cell receptor-associated protein 31	91.0569	91.0569	K14009
A0A8C0T307	P61201	COPS2		COP9 signalosome complex subunit 2		92.4242	96.3883	K12176	Ubiquitin system
A0A8C0T3T7	O75477	ERLIN1		Erlin	Erlin-1	95.4023	95.4023	K23341	Ubiquitin system
A0A8C0T3U3	P32004	L1CAM		L1 cell adhesion molecule	Neural cell adhesion molecule L1	79.4674	90.2148	K06550	Lectins;CD molecules
A0A8C0T3Z6	Q99426	TBCB		Tubulin-folding cofactor B		90.873	93.8525	K17262	Exosome;Cytoskeleton proteins
A0A8C0T401	P62877	RBX1		cullin-RING-type E3 NEDD8 transferase	E3 ubiquitin-protein ligase RBX1	100	100	K03868	Enzyme;Ubiquitin system;DNA repair and recombination proteins
A0A8C0T4F2	Q5T447	HECTD3		HECT domain E3 ubiquitin protein ligase 3	E3 ubiquitin-protein ligase HECTD3	98.2578	98.2578	K12233	Enzyme;Ubiquitin system
A0A8C0T4S8	P84103	SRSF3		RRM domain-containing protein	Serine/arginine-rich splicing factor 3	100	100	K12892	Spliceosome
A0A8C0T5K5	Q8N8A6	DDX51		ATP-dependent RNA helicase	ATP-dependent RNA helicase DDX51	77.813	73.7237	K14807	Enzyme;Ribosome biogenesis
A0A8C0T6K5	Q9UJX3	ANAPC7		Anaphase-promoting complex subunit 7		94.1472	99.646	K03354	Chromosome and associated proteins;Ubiquitin system
A0A8C0T6Y4	O43716	GATC		Glutamyl-tRNA(Gln) amidotransferase subunit C, mitochondrial		82.3529	82.3529	K02435	Enzyme;Mitochondrial biogenesis
A0A8C0T752	Q9Y3D0	CIAO2B		Cytosolic iron-sulfur assembly component 2B		98.1707	98.773	K26403	Chromosome and associated proteins;DNA repair and recombination proteins
A0A8C0T7D7	P56962	STX17		t-SNARE coiled-coil homology domain-containing protein	Syntaxin-17	83.7681	95.6954	K08491	Membrane trafficking
A0A8C0T7F4	Q9ULX3	NOB1		RNA-binding protein NOB1		90.5797	91.0194	K11883	Ribosome biogenesis;Proteasome
A0A8C0T849	Q9UH62	ARMCX3		Armadillo repeat-containing domain-containing protein	Armadillo repeat-containing X-linked protein 3	94.723	94.723	K26189	Mitochondrial biogenesis
A0A8C0T8D5	Q9H1Z4	WDR13		WD repeat domain 13	WD repeat-containing protein 13	99.5876	99.5876	K24739	Domain-containing proteins not elsewhere classified
A0A8C0T8L9	P29083	GTF2E1		Ral transcription factor IIE subunit 1	General transcription factor IIE subunit 1	96.347	96.1276	K03136	Transcription machinery
A0A8C0T8M3	Q32P44	EML3		EMAP like 3	Echinoderm microtubule-associated protein-like 3	75.6422	88.7277	K18596	Cytoskeleton proteins
A0A8C0T8R9	Q9HD33	MRPL47		Large ribosomal subunit protein uL29m		80.5556	81.2	K17428	Ribosome
A0A8C0T995	Q16543	CDC37		Hsp90 co-chaperone Cdc37		96.3158	96.8254	K09554	Mitochondrial biogenesis;Chaperones and folding catalysts
A0A8C0T997	Q96AT1	KIAA1143		DUF4604 domain-containing protein	Uncharacterized protein KIAA1143	89.6774	90.2597	hsa: 57456
A0A8C0TA55	Q8N983	MRPL43		Large ribosomal subunit protein mL43		89.3082	89.3082	K17424	Ribosome
A0A8C0TA97	Q00534	CDK6		Cyclin-dependent kinase 6		98.1595	98.1595	K02091	Enzyme;Protein kinases
A0A8C0TAR3	P16104	H2AX		Histone H2A	Histone H2AX	99.3007	99.3007	K11251	Chromosome and associated proteins;Exosome
A0A8C0TAV5	Q9UK41	VPS28		Vacuolar protein sorting-associated protein 28 homolog		97.7376	97.7376	K12184	Membrane trafficking;Exosome
A0A8C0TBA8	P09001	MRPL3		Large ribosomal subunit protein uL3m		85.3448	85.3448	K02906	Ribosome
A0A8C0TC02	P40222	TXLNA		Taxilin alpha	Alpha-taxilin	91.8004	94.3223	K26808	Membrane trafficking
A0A8C0TC47	P62851	RPS25		40S ribosomal protein S25	Small ribosomal subunit protein eS25	100	100	K02975	Ribosome
A0A8C0TC90	Q9BPX5	ARPC5L		Actin-related protein 2/3 complex subunit 5	Actin-related protein 2/3 complex subunit 5-like protein	98.6928	98.6928	K05754	Membrane trafficking;Cytoskeleton proteins
A0A8C0TCH9	Q7Z569	BRAP		BRCA1-associated protein		97.2973	97.2973	K10632	Enzyme;Ubiquitin system
A0A8C0TCN1	Q6UXN9	WDR82		WD repeat domain 82	WD repeat-containing protein 82	100	100	K14962	Chromosome and associated proteins;Messenger RNA biogenesis
A0A8C0TCP3	Q96GW9	MARS2		Methionine--tRNA ligase, mitochondrial		87.1838	87.1838	K01874	Enzyme;Transfer RNA biogenesis
A0A8C0TCX7	Q14320	FAM50A		FAM50A/XAP5 C-terminal domain-containing protein	Protein FAM50A	97.0501	97.0501	K13119	Spliceosome
A0A8C0TCZ5	P26583	HMGB2		High mobility group protein B2		98.5714	99.0431	K11295	Chromosome and associated proteins;Exosome
A0A8C0TD32	Q96JH7	VCPIP1		ubiquitinyl hydrolase 1	Deubiquitinating protein VCPIP1	97.2131	97.054	K11861	Enzyme;Ubiquitin system;Peptidases and inhibitors
A0A8C0TD93	P61758	VBP1		Prefoldin subunit 3		96.4467	96.4467	hsa: 7411
A0A8C0TDT4	P62277	RPS13		Small ribosomal subunit protein uS15		100	100	K02953	Ribosome
A0A8C0TDV4	P53582	METAP1		Methionine aminopeptidase	Methionine aminopeptidase 1	98.7047	98.7047	K01265	Enzyme;Peptidases and inhibitors
A0A8C0TEQ5	O75821	EIF3G		Eukaryotic translation initiation factor 3 subunit G		99.375	99.375	K03248	Translation factors
A0A8C0TEU8	Q14165	MLEC		Malectin		97.9239	96.9178	hsa: 9761
A0A8C0TFU2	Q6NXE6	ARMC6		Armadillo repeat-containing protein 6		84.2437	80.0399	K24166	Domain-containing proteins not elsewhere classified
A0A8C0TG77	Q9UFW8	CGGBP1		CGG triplet repeat-binding protein 1		100	100	hsa: 8545
A0A8C0TGA5	Q15459	SF3A1		Splicing factor 3a subunit 1		98.6129	98.6129	K12825	Spliceosome
A0A8C0TH72	P52294	KPNA1		Importin subunit alpha	Importin subunit alpha-5	97.0962	99.4424	K23940	Chromosome and associated proteins
A0A8C0TI81	P11441	UBL4A		Ubiquitin-like protein 4A		89.3082	90.4459	K23388	Membrane trafficking;DNA repair and recombination proteins
A0A8C0TID4	P52272	HNRNPM		RRM domain-containing protein	Heterogeneous nuclear ribonucleoprotein M	92.3274	98.9041	K12887	Spliceosome
A0A8C0TIF6	Q96RQ3	MCCC1		Methylcrotonyl-CoA carboxylase subunit 1	Methylcrotonoyl-CoA carboxylase subunit alpha, mitochondrial	88	88	K01968	Enzyme
A0A8C0TIJ9	P48643	CCT5		T-complex protein 1 subunit epsilon		98.3364	98.3364	K09497	Exosome;Chaperones and folding catalysts;Cilium and associated proteins
A0A8C0TIP6	Q969Z0	TBRG4		FAST kinase domain-containing protein 4		75.5943	75.5943	K27756	Mitochondrial biogenesis
A0A8C0TIW1	Q9NUY8	TBC1D23		TBC1 domain family member 23		91.4952	95.422	K22555	Membrane trafficking
A0A8C0TJP4	O00487	PSMD14		Proteasome 26S subunit, non-ATPase 14	26S proteasome non-ATPase regulatory subunit 14	100	100	K03030	Ubiquitin system;Peptidases and inhibitors;Proteasome
A0A8C0TKL9	O76003	GLRX3		Glutaredoxin-3		89.3175	89.8507	hsa: 105397
A0A8C0TKS7	O00115	DNASE2		Deoxyribonuclease-2-alpha		71.7033	72.5	K01158	Enzyme
A0A8C0TL18	Q14554	PDIA5		Protein disulfide isomerase family A member 5	Protein disulfide-isomerase A5	93.0636	93.0636	K09583	Enzyme;Membrane trafficking;Chaperones and folding catalysts
A0A8C0TNH3	Q9Y295	DRG1		Developmentally-regulated GTP-binding protein 1		100	100	K06944	Chromosome and associated proteins;Translation factors
A0A8C0TNM0	Q8NFH5	NUP35		Nucleoporin NUP35		83.8624	97.2393	K14313	Messenger RNA biogenesis
A0A8C0TR41	P19525	EIF2AK2		Eukaryotic translation initiation factor 2 alpha kinase 2	Interferon-induced, double-stranded RNA-activated protein kinase	63.1579	60.98	K16195	Enzyme;Messenger RNA biogenesis;Protein phoshphatases and associated proteins;Protein kinases
A0A8C0TSZ8	Q96AX1	VPS33A		Vacuolar protein sorting-associated protein 33A		98.3222	98.3222	K20182	Membrane trafficking
A0A8C0TT89	Q9Y5U2	TSSC4		U5 small nuclear ribonucleoprotein TSSC4		69.0625	67.1733	hsa: 10078
A0A8C0TU09	O43583	DENR		Density-regulated protein		69.4545	96.4646	K24272	Messenger RNA biogenesis
A0A8C0TZW5	Q6AI12	ANKRD40		Ankyrin repeat domain 40	Ankyrin repeat domain-containing protein 40	94.5055	93.4783	hsa: 91369
A0A8C0YU11	Q96AY3	FKBP10		peptidylprolyl isomerase	Peptidyl-prolyl cis-trans isomerase FKBP10	92.4399	92.4399	K09575	Enzyme;Chaperones and folding catalysts
A0A8C0YVX9	Q15654	TRIP6		Thyroid hormone receptor interactor 6	Thyroid receptor-interacting protein 6	88.9121	89.2857	K12792
A0A8C0YW64	Q9GZU8	PSME3IP1		Proteasome activator subunit 3 interacting protein 1	PSME3-interacting protein	94.0945	94.0945	hsa: 80011
A0A8C0YW82	Q99459	CDC5L		Cell division cycle 5-like protein		99.0025	99.0025	K12860	Spliceosome;DNA repair and recombination proteins
A0A8C0YXE9	O00625	PIR		Pirin		96.2069	96.2069	K06911	Enzyme
A0A8C0YYF9	P55145	MANF		Mesencephalic astrocyte-derived neurotrophic factor		93.9227	93.4066	K22556	Membrane trafficking
A0A8C0Z0M5	Q9BSF4	TIMM29		Translocase of inner mitochondrial membrane 29	Mitochondrial import inner membrane translocase subunit Tim29	83.8462	83.8462	hsa: 90580
A0A8C0Z0Q7	Q9BZX2	UCK2		Uridine-cytidine kinase	Uridine-cytidine kinase 2	96.5517	96.5517	K00876	Enzyme
A0A8C0Z183	Q6RFH5	WDR74		WD repeat domain 74	WD repeat-containing protein 74	90.3394	89.8701	K14841	Ribosome biogenesis
A0A8C0Z207	Q12996	CSTF3		Cleavage stimulation factor subunit 3		99.8605	99.8605	K14408	Messenger RNA biogenesis
A0A8C0Z292	P07203	GPX1		Glutathione peroxidase	Glutathione peroxidase 1	93.1373	93.5961	K00432	Enzyme
A0A8C0Z2C9	P14174	MIF		Macrophage migration inhibitory factor		93.913	93.913	K07253	Enzyme;Exosome
A0A8C0Z2G8	Q15021	NCAPD2		Condensin complex subunit 1		89.7143	89.6503	K06677	Chromosome and associated proteins
A0A8C0Z325	P55081	MFAP1		Microfibrillar-associated protein 1		78.9588	82.9157	K13110	Spliceosome
A0A8C0Z3I3	P12268	IMPDH2		Inosine-5'-monophosphate dehydrogenase	Inosine-5'-monophosphate dehydrogenase 2	99.4163	99.4163	K00088	Enzyme;Exosome
A0A8C0Z441	Q9GZZ9	UBA5		Ubiquitin-like modifier-activating enzyme 5		90.8665	96.0396	K12164	Ubiquitin system
A0A8C0Z4J8	Q96A26	FAM162A		Protein FAM162A		80.6452	81.1688	hsa: 26355
A0A8C0Z5H2	Q14232	EIF2B1		Translation initiation factor eIF2B subunit alpha		96.3934	96.3934	K03239	Translation factors
A0A8C0Z5N9	Q9BZJ0	CRNKL1		Crooked neck pre-mRNA splicing factor 1	Crooked neck-like protein 1	91.3462	96.7977	K12869	Chromosome and associated proteins;Spliceosome
A0A8C0Z5X7	P20962	PTMS		Parathymosin		99.0196	99.0196	hsa: 5763
A0A8C0Z5Z6	Q9BQ61	TRIR		Telomerase RNA component interacting RNase		94.4134	96.0227	K01149	DNA replication proteins
A0A8C0Z6N5	Q6NZY4	ZCCHC8		Zinc finger CCHC domain-containing protein 8		87.4471	87.6945	K13128	Spliceosome
A0A8I3MRP4	Q6P3W7	SCYL2		SCY1 like pseudokinase 2	SCY1-like protein 2	75.942	84.6071	K17541	Membrane trafficking;Protein kinases
A0A8I3N9V3	P08238	HSP90AB1		Heat shock protein HSP 90-beta		99.8571	96.547	K04079	Membrane trafficking;Exosome;Mitochondrial biogenesis;Chaperones and folding catalysts;Protein phoshphatases and associated proteins;Proteasome
A0A8I3NCM0	Q13185	CBX3		Chromobox 3	Chromobox protein homolog 3	89.7059	100	K11586	Chromosome and associated proteins;Spliceosome
A0A8I3NE39	P34931	HSPA1L		Heat shock 70 kDa protein 1-like		93.0408	95.9438	K03283	Membrane trafficking;Exosome;Spliceosome;Ribosome biogenesis;Mitochondrial biogenesis;Chaperones and folding catalysts;Protein phoshphatases and associated proteins;Proteasome
A0A8I3NGU6	P09543	CNP		2',3'-cyclic-nucleotide 3'-phosphodiesterase		78.032	80.9976	K01121	Enzyme;Exosome
A0A8I3P0V5	Q9GZL7	WDR12		Ribosome biogenesis protein WDR12		95.0355	95.0355	K14863	Ribosome biogenesis
A0A8I3P3A3	P30566	ADSL		Adenylosuccinate lyase		92.449	93.595	K01756	Enzyme
A0A8I3P6G1	Q9Y265	RUVBL1		RuvB-like helicase	RuvB-like 1	100	100	K04499	Enzyme;Chromosome and associated proteins;Cilium and associated proteins
A0A8I3PQU6	Q16222	UAP1		UDP-N-acetylglucosamine pyrophosphorylase 1	UDP-N-acetylhexosamine pyrophosphorylase	70.5056	96.1686	K00972	Enzyme
A0A8I3Q520	Q14839	CHD4		DNA helicase	Chromodomain-helicase-DNA-binding protein 4	99.3201	99.3201	K11643	Chromosome and associated proteins
A0A8I3RRB2	Q96S99	PLEKHF1		Pleckstrin homology and FYVE domain containing 1	Pleckstrin homology domain-containing family F member 1	54.1936	90.3226	K23858	Domain-containing proteins not elsewhere classified
A0A8I3RWT2	P61221	ABCE1		ATP binding cassette subfamily E member 1	ATP-binding cassette sub-family E member 1	94.3457	97.4958	K06174	Ribosome biogenesis
A0A8I3S0W9	Q9Y5Y2	NUBP2		Cytosolic Fe-S cluster assembly factor NUBP2		85.6089	85.6089	hsa: 10101
A0A8I3S5F5	Q9C0C2	TNKS1BP1		Tankyrase 1 binding protein 1	182 kDa tankyrase-1-binding protein	75.8204	76.1712	hsa: 85456
E2RGI3	P09234	SNRPC		U1 small nuclear ribonucleoprotein C		100	100	K11095	Spliceosome
E2RH47	P23396	RPS3		Small ribosomal subunit protein uS3		99.5885	99.5885	K02985	Ribosome
P33724	Q03135	CAV1		Caveolin-1		96.0674	96.0674	K06278	Membrane trafficking
P49256	Q12907	LMAN2		Vesicular integral-membrane protein VIP36		98.0337	98.0337	K10082	Membrane trafficking;Lectins
P51147	P51148	RAB5C		Ras-related protein Rab-5C		98.6111	98.6111	K07889	Membrane trafficking;Exosome
P63050	P62987	UBA52		Ubiquitin-ribosomal protein eL40 fusion protein		100	100	K02927	Ubiquitin system;Ribosome
Q2THW9	Q9C0B5	ZDHHC5		Palmitoyltransferase ZDHHC5		97.6224	97.6224	K20030	Enzyme;Membrane trafficking
P55745	Q9UL25	RAB21		Ras-related protein Rab-21		58.2979	81.5476	K07890	Membrane trafficking;Exosome
A0A8C0MDI5	Q6IQ22	RAB12		Ras-related protein Rab-12		90.1685	94.4118	hsa: 201475
A0A8C0NSG7	Q86V81	ALYREF		Aly/REF export factor	THO complex subunit 4	96.9582	96.5909	hsa: 10189
A0A8C0Z2S0	Q9BTE6		AARSD1	Alanyl-tRNA editing protein Aarsd1		91.2621	59.6825	K07050	Transfer RNA biogenesis
A0A8C0QHW0	Q16774-2	GUK1		guanylate kinase	Isoform 2 of Guanylate kinase	89.9543	90.367
A0A8C0SER8	Q9Y490-2	TLN1		Talin 1	Isoform 2 of Talin-1	98.6317	99.2916
A0A8C0NRI7	Q86V21	TMEM132B	AACS	Acetoacetyl-CoA synthetase		87.1653	79.8646	K01907	Enzyme;Lipid biosynthesis proteins
A0A8P0NDD9	O43252	PAPSS1		3'-phosphoadenosine 5'-phosphosulfate synthase 1	Bifunctional 3'-phosphoadenosine 5'-phosphosulfate synthase 1	93.2024	98.8782	K13811	Enzyme
A0A8C0P1Q1	O14545	TRAFD1		TRAF-type zinc finger domain-containing protein 1		75.969	84.1924	hsa: 10906
A0A8C0QED5	Q13641	TPBG		Trophoblast glycoprotein		66.7269	87.8571	hsa: 7162
A0A8C0PAX5	P45954	ACADSB		Short/branched chain specific acyl-CoA dehydrogenase, mitochondrial		68.677	81.713	K09478	Enzyme
A0A8C0N082	Q02040	AKAP17A		A-kinase anchor protein 17A		86.8163	89.0648	K13169	Spliceosome
A0A8C0NI41	Q8WTS6	SETD7		Histone-lysine N-methyltransferase SETD7		97.832	98.6339	K11431	Enzyme;Chromosome and associated proteins
A0A8C0PR08	P63272	SUPT4H1		Transcription elongation factor SPT4		78	100	K15171	Messenger RNA biogenesis;Transcription machinery
A0A8C0P4I5	Q06203	PPAT		Amidophosphoribosyltransferase		91.5414	94.1973	K00764	Enzyme;Peptidases and inhibitors
A0A8C0RSR4	P36405	ARL3		ADP-ribosylation factor-like protein 3		64.7273	97.8022	K07944	Cilium and associated proteins
A0A8C0QKG0	Q7L5D6	GET4		Guided entry of tail-anchored proteins factor 4	Golgi to ER traffic protein 4 homolog	67.6856	94.8012	K23387	Membrane trafficking;DNA repair and recombination proteins
A0A8C0MM41	Q9NRN7	AASDHPPT		L-aminoadipate-semialdehyde dehydrogenase-phosphopantetheinyl transferase		89.8734	91.9094	K06133
A0A8C0N1A6	Q9BW19	KIFC1		Kinesin-like protein	Kinesin-like protein KIFC1	86.6071	86.4785	K10405	Enzyme;Chromosome and associated proteins;Cytoskeleton proteins
A0A8C0RW25	Q9HAV7	GRPEL1		GrpE protein homolog	GrpE protein homolog 1, mitochondrial	85.6522	90.7834	K03687	Mitochondrial biogenesis;Chaperones and folding catalysts
A0A8C0PGJ2	Q9H6W3	RIOX1		Bifunctional lysine-specific demethylase and histidyl-hydroxylase	Ribosomal oxygenase 1	83.5703	82.5273	K16914	Enzyme;Chromosome and associated proteins;Ribosome biogenesis
A0A8C0LRW8	Q9Y314	NOSIP		Nitric oxide synthase-interacting protein		67.8657	94.0199	K13125	Spliceosome
A0A8C0TFS1	Q04760	GLO1		Lactoylglutathione lyase		88.8268	86.413	K01759	Enzyme
A0A8C0NK68	Q9Y230	RUVBL2		RuvB-like helicase	RuvB-like 2	99.784	99.784	K11338	Enzyme;Chromosome and associated proteins;Cilium and associated proteins
A0A8C0NJP5	Q5T5P2	KIAA1217		Actin interacting protein 3-like C-terminal domain-containing protein	Sickle tail protein homolog	81.2157	83.8909	hsa: 56243
A0A8C0NDB8	P54727	RAD23B		UV excision repair protein RAD23	UV excision repair protein RAD23 homolog B	93.1204	92.665	K10839	DNA repair and recombination proteins;Proteasome
A0A8C0MDT7	P43897	TSFM		Elongation factor Ts, mitochondrial		66.0848	81.5385	K02357	Mitochondrial biogenesis;Translation factors
A0A8C0Z1K7	Q9H0E3	SAP130		Histone deacetylase complex subunit SAP130 C-terminal domain-containing protein	Histone deacetylase complex subunit SAP130	95.1062	97.4456	K19192	Chromosome and associated proteins
A0A8C0MAY3	Q9Y5S9	RBM8A		RNA-binding protein 8A		100	99.4253	K12876	Spliceosome;Messenger RNA biogenesis
A0A8C0N2E1	Q9Y3C6	PPIL1		Peptidyl-prolyl cis-trans isomerase	Peptidyl-prolyl cis-trans isomerase-like 1	62.8788	100	K12733	Enzyme;Spliceosome;Chaperones and folding catalysts
A0A8C0QFA0	Q9NRG0	CHRAC1		Chromatin accessibility complex subunit 1	Chromatin accessibility complex protein 1	83.8462	83.2061	K11656	Chromosome and associated proteins
A0A8C0PXP8	Q7L4I2	RSRC2		Arginine/serine-rich coiled-coil protein 2		98.8506	99.0783	K24595
A0A8C0PDT0	Q92538	GBF1		SEC7 domain-containing protein	Golgi-specific brefeldin A-resistance guanine nucleotide exchange factor 1	96.1249	96.0215	K18443	Membrane trafficking
A0A8C0N800	Q8TDP1	RNASEH2C		Uncharacterized protein	Ribonuclease H2 subunit C	75.5952	77.439	K10745	DNA replication proteins
A0A8C0PY91	Q8WVY7	UBLCP1		Ubiquitin-like domain-containing CTD phosphatase 1		100	100	K17618	Enzyme;Protein phoshphatases and associated proteins
A0A8C0Q1A8	P06737	PYGL		Alpha-1,4 glucan phosphorylase	Glycogen phosphorylase, liver form	89.7778	95.3955	K00688	Enzyme
A0A8C0NU25	P22059	OSBP		Oxysterol-binding protein	Oxysterol-binding protein 1	97.896	98.0173	K20456	Membrane trafficking
A0A8C0NP49	Q92542	NCSTN		Nicastrin		70.2614	90.9732	K06171
A0A8C0NJG0	P52630	STAT2		Signal transducer and activator of transcription	Signal transducer and activator of transcription 2	86.1827	86.4865	K11221	Transcription factors
A0A8C0MIM7	Q9P1Y6	PHRF1		PHD and ring finger domains 1	PHD and RING finger domain-containing protein 1	69.4957	68.5264	K17586	Protein phoshphatases and associated proteins
A0A8C0PQV9	P05026	ATP1B1		Sodium/potassium-transporting ATPase subunit beta	Sodium/potassium-transporting ATPase subunit beta-1	93.3993	93.3993	K01540	CD molecules
A0A8P0TGP6	P02533	KRT14		Keratin 14	Keratin, type I cytoskeletal 14	69.0283	72.2458	K07604	Exosome;Cytoskeleton proteins
A0A8C0TJ18	Q13526	PIN1		Peptidyl-prolyl cis-trans isomerase	Peptidyl-prolyl cis-trans isomerase NIMA-interacting 1	86.9863	77.9141	K09578	Enzyme;Chaperones and folding catalysts;Transcription machinery
A0A8C0NB60	Q8IXK0	PHC2		Polyhomeotic homolog 2	Polyhomeotic-like protein 2	91.1422	91.0361	K11457	Chromosome and associated proteins
A0A8C0P4U9	P35269	GTF2F1		Transcription initiation factor IIF subunit alpha	General transcription factor IIF subunit 1	93.8104	93.8104	K03138	Transcription machinery
A0A8C0NZE2	Q96GA3	LTV1		Protein LTV1 homolog		89.2405	89.0526	K14798	Ribosome biogenesis
A0A8C0PJJ6	P49593	PPM1F		PPM-type phosphatase domain-containing protein	Protein phosphatase 1F	80.0429	82.1586	K17502	Enzyme;Protein phoshphatases and associated proteins
A0A8C0NAA0	Q15434	RBMS2		RRM domain-containing protein	RNA-binding motif, single-stranded-interacting protein 2	88.5781	93.3661	K24990	Domain-containing proteins not elsewhere classified
A0A8C0PDU0	Q9H6T3	RPAP3		RNA polymerase II-associated protein 3		89.1403	88.8722	K23002	Transcription machinery
A0A8C0QBL1	Q9NQZ2	UTP3		UTP3 small subunit processome component	Something about silencing protein 10	88.7029	88.5177	K14767	Ribosome biogenesis
A0A8C0MZ51	Q7Z422	SZRD1		SUZ RNA-binding domain-containing	SUZ domain-containing protein 1	98.6842	98.6842	hsa: 26099
A0A8C0RTV1	Q8WYA6	CTNNBL1		Beta-catenin-like protein 1 N-terminal domain-containing protein	Beta-catenin-like protein 1	98.5075	93.7833	K12864	Spliceosome
A0A8C0PLW8	P62424	RPL7A		60S ribosomal protein L7a	Large ribosomal subunit protein eL8	100	100	K02936	Ribosome biogenesis;Ribosome
A0A8C0P343	Q96EY8	MMAB		Cobalamin adenosyltransferase-like domain-containing protein	Corrinoid adenosyltransferase MMAB	88.7029	84.8	K00798	Enzyme
A0A8C0N1X7	Q9Y365	STARD10		StAR related lipid transfer domain containing 10	START domain-containing protein 10	84.1317	96.5636	K24142	Transporters
A0A8C0P625	Q5VWZ2	LYPLAL1		palmitoyl-protein hydrolase	Lysophospholipase-like protein 1	88.983	88.6076	K06999
A0A8C0M3P6	Q9H9B4	SFXN1		Sidoreflexin	Sideroflexin-1	79.9383	80.4348	K23500	Mitochondrial biogenesis;Transporters
A0A8C0PNP4	Q16795	NDUFA9		NADH dehydrogenase [ubiquinone] 1 alpha subcomplex subunit 9, mitochondrial		59.4796	84.8806	K03953
A0A8C0PY46	Q9UL46	PSME2		Proteasome activator complex subunit 2		97.0711	97.0711	K06697	Proteasome
A0A8C0PA43	Q12789	GTF3C1		B-block binding subunit of TFIIIC domain-containing protein	General transcription factor 3C polypeptide 1	80.9322	81.5078	K15199	Transcription machinery
A0A8C0LTD4	Q92817	EVPL		SH3 domain-containing protein	Envoplakin	83.0116	84.604	K10383	Cytoskeleton proteins
A0A8C0QGC6	Q96LJ7	DHRS1		Dehydrogenase/reductase 1	Dehydrogenase/reductase SDR family member 1	83.0671	83.0671	K11163
A0A8C0P9Y9	P05362	ICAM1		Intercellular adhesion molecule 1		62.1723	62.406	K06490	Exosome;Lectins;CD molecules
A0A8C0PD38	P07942	LAMB1		Laminin subunit beta-1		89.0323	92.7212	K05636
A0A0A7KLD0	P04150	NR3C1		Glucocorticoid receptor		92.9577	93.4363	K05771	Transcription factors; Nuclear receptors
A0A8C0NIU9	Q8IZW8	TNS4		Tensin-4		83.7762	83.7762	K18080	Protein phoshphatases and associated proteins
A0A8C0Z5M9	P54886	ALDH18A1		Delta-1-pyrroline-5-carboxylate synthase		96.6165	96.9811	K12657	Enzyme
A0A8C0N881	P49748	ACADVL		Very long-chain specific acyl-CoA dehydrogenase, mitochondrial		87.5556	90.229	K09479	Enzyme
A0A8C0LWH8	Q9Y696	CLIC4		Chloride intracellular channel protein	Chloride intracellular channel protein 4	98.8048	98.0237	K05024	Exosome
A0A8P0SCP9	P14625	HSP90B1		Endoplasmin		95.0182	97.3848	K09487	Membrane trafficking;Chaperones and folding catalysts
A0A8C0MTK9	P34897	SHMT2		Serine hydroxymethyltransferase	Serine hydroxymethyltransferase, mitochondrial	95.0199	94.6429	K00600	Enzyme
A0A8C0Q5W7	P61160	ACTR2		Actin-related protein 2		98.731	98.731	K17260	Membrane trafficking;Exosome;Cytoskeleton proteins
A0A8C0MNK9	Q8IZL8	PELP1		Modulator of non-genomic activity of estrogen receptor	Proline-, glutamic acid- and leucine-rich protein 1	79.7753	87.9646	K16913	Ribosome biogenesis
A0A8C0NKM2	O00178	GTPBP1		GTP-binding protein 1		98.3558	98.3558	K24887	Messenger RNA biogenesis;Translation factors;Transfer RNA biogenesis
A0A8C0P6F9	Q7L273	KCTD9		Potassium channel tetramerization domain containing 9	BTB/POZ domain-containing protein KCTD9	99.2288	99.2288	K21919	Ubiquitin system
A0A8C0MBD9	O60568	PLOD3		procollagen-lysine 5-dioxygenase	Multifunctional procollagen lysine hydroxylase and glycosyltransferase LH3	86.443	87.2629	K13646	Enzyme;Glycosyltransferase
A0A8C0LWF8	P35580	MYH10		Myosin heavy chain 10	Myosin-10	90.1292	97.3592	K10352	Exosome;Cytoskeleton proteins
A0A8C0NFA0	P62241	RPS8		40S ribosomal protein S8	Small ribosomal subunit protein eS8	95.8333	99.5192	K02995	Ribosome
A0A8C0SJI1	P49441	INPP1		inositol-1,4-bisphosphate 1-phosphatase	Inositol polyphosphate 1-phosphatase	76.75	76.9424	K01107	Enzyme
A0A8C0MTP8	A4D1P6	WDR91		WD repeat-containing protein 91		94.1019	93.9759	K24760	Membrane trafficking
A0A8C0PBE7	Q86YV5	PRAG1		Protein kinase domain-containing protein	Inactive tyrosine-protein kinase PRAG1	80.5322	81.7923	K17537	Enzyme;Protein kinases
A0A8C0Q178	P57678	GEMIN4		Gem nuclear organelle associated protein 4	Gem-associated protein 4	85.6468	85.7278	K13132	Spliceosome
A0A8C0NJH9	Q8IYI6	EXOC8		Exocyst complex component 8		96.9027	90.6207	K19986	Membrane trafficking
A0A8C0MNM4	Q9NPF4	OSGEP		N(6)-L-threonylcarbamoyladenine synthase	tRNA N6-adenosine threonylcarbamoyltransferase	96.1194	96.1194	K01409	Enzyme;Transfer RNA biogenesis
A0A8C0LSB4	Q3ZCQ8	TIMM50		Mitochondrial import inner membrane translocase subunit TIM50		92.9775	93.7677	K17496	Mitochondrial biogenesis;Transporters
A0A8C0TS59	O95817	BAG3		BAG cochaperone 3	BAG family molecular chaperone regulator 3	79.4545	76	K09557	Membrane trafficking;Chaperones and folding catalysts
A0A8C0PP81	O95721	SNAP29		Synaptosomal-associated protein 29		87.3518	85.6589	K08509	Membrane trafficking
A0A8C0MP16	P53701	HCCS		Holocytochrome c-type synthase		91.1765	92.5373	K01764	Enzyme
A0A8C0RN05	Q7L5N1	COPS6		COP9 signalosome complex subunit 6		98.7539	96.9419	K12179	Ubiquitin system
A0A8C0NSX2	P83436	COG7		Conserved oligomeric Golgi complex subunit 7		93.0412	93.7662	K20294	Membrane trafficking
A0A8C0P9S0	Q99798	ACO2		Aconitate hydratase, mitochondrial		91.9554	95.2564	K01681	Enzyme
A0A8C0SS63	P61962	DCAF7		DDB1 and CUL4 associated factor 7	DDB1- and CUL4-associated factor 7	100	99.1228	K11805	Chromosome and associated proteins;Ubiquitin system
A0A8P0TPN8	Q15645	TRIP13		Pachytene checkpoint protein 2 homolog		93.287	93.287	K22399	Chromosome and associated proteins
A0A8C0N1Z9	Q5T0N5	FNBP1L		Formin-binding protein 1-like		98.6864	99.3388	K20121	Membrane trafficking
A0A8C0MQX1	Q8TB61	SLC35B2		Adenosine 3'-phospho 5'-phosphosulfate transporter 1		95.8621	96.5278	K15276	Transporters
A0A8C0MC33	O75165	DNAJC13		J domain-containing protein	DnaJ homolog subfamily C member 13	97.8619	97.9492	K09533	Spliceosome;Chaperones and folding catalysts
A0A8C0PHR8	Q6VMQ6	ATF7IP		ATF7-interacting protein protein binding domain-containing protein	Activating transcription factor 7-interacting protein 1	87.4209	87.0079	K25802	Chromosome and associated proteins
A0A8C0PEC6	Q9Y312	AAR2		Protein AAR2 homolog		71.7132	93.75	K13205	Spliceosome
A0A8C0TJE0	Q9Y6K9	IKBKG		NF-kappa-B essential modulator		90.2148	90.2148	K07210	Protein kinases
A0A8C0LRG6	Q9UPN7	PPP6R1		Protein phosphatase 6 regulatory subunit 1	Serine/threonine-protein phosphatase 6 regulatory subunit 1	87.9369	88.5358	K15499	DNA repair and recombination proteins;Protein phoshphatases and associated proteins
A0A8C0RH82	P41240	CSK		Tyrosine-protein kinase	Tyrosine-protein kinase CSK	98.022	99.1111	K05728	Enzyme;Exosome;Protein kinases
A0A8C0P754	Q6GMV2	SMYD5		Histone-lysine N-trimethyltransferase SMYD5		97.136	97.3684	K24635	Domain-containing proteins not elsewhere classified
A0A8C0M5A1	Q9H269	VPS16		Vacuolar protein sorting-associated protein 16 homolog		97.9141	95.1132	K20180	Membrane trafficking
Q9GKK4	P51570	GALK1		Galactokinase		67.2348	90.5612	K00849	Enzyme;Exosome
A0A8C0PAG3	Q92609	TBC1D5		Rab-GAP TBC domain-containing protein	TBC1 domain family member 5	82.0513	90.0857	K18469	Membrane trafficking
A0A8C0TI37	Q92544	TM9SF4		Transmembrane 9 superfamily member	Transmembrane 9 superfamily member 4	98.7539	98.7539	K17086	Exosome
A0A8C0MRX1	P46459	NSF		Vesicle-fusing ATPase		88.4337	98.6559	K06027	Enzyme;Membrane trafficking
A0A8C0MHR1	Q13423	NNT		proton-translocating NAD(P)(+) transhydrogenase	NAD(P) transhydrogenase, mitochondrial	96.4154	96.593	K00323	Enzyme
A0A8P0TB11	Q9BZL4	PPP1R12C		Protein phosphatase 1 regulatory subunit	Protein phosphatase 1 regulatory subunit 12C	90.7097	89.8977	K17457	Protein phoshphatases and associated proteins
A0A8C0MRR1	O15127	SCAMP2		Secretory carrier-associated membrane protein	Secretory carrier-associated membrane protein 2	69.7561	86.9301	K19995	Membrane trafficking
A0A8C0MG89	P51688	SGSH		N-sulphoglucosamine sulphohydrolase		89.703	90.239	K01565	Enzyme
A0A8P0SCF6	P23588	EIF4B		Eukaryotic translation initiation factor 4B		95.2922	96.072	K03258	Messenger RNA biogenesis;Translation factors
A0A8C0TW86	Q9NR28	DIABLO		Direct IAP-binding protein with low pI	Diablo IAP-binding mitochondrial protein	84.6457	89.9582	K10522	Ubiquitin system;Mitochondrial biogenesis

## Sheet: Supplementary Table 1B
Supplementary Table 1B. Gene annotation and binary enrichment results for selected 721 orthologous proteins using the Reactome database. Includes Uniprot identifier, functional annotations, term memberships and binary values (1/0) indicating presence within enriched Reactome terms. Session id: tj4424bv9 (data: 25/06/2025)
MyList	Gene ID	Type	Tax ID	Homologene Gene ID	Homologene Gene Tax ID	R-HSA-8953854 Metabolism of RNA	R-HSA-9824446 Viral Infection Pathways	R-HSA-162906 HIV Infection	R-HSA-1640170 Cell Cycle	R-HSA-5653656 Vesicle-mediated transport	R-HSA-1280215 Cytokine Signaling in Immune s	R-HSA-6798695 Neutrophil degranulation	R-HSA-6781827 Transcription-Coupled Nucleoti	R-HSA-194315 Signaling by Rho GTPases	R-HSA-159236 Transport of Mature mRNA deriv	R-HSA-1169410 Antiviral mechanism by IFN-sti	R-HSA-9837999 Mitochondrial protein degradat	R-HSA-5389840 Mitochondrial translation elon	R-HSA-5663202 Diseases of signal transductio	R-HSA-1428517 Aerobic respiration and respir	R-HSA-15869 Metabolism of nucleotides	R-HSA-381119 Unfolded Protein Response (UPR	R-HSA-532668 N-glycan trimming in the ER an	R-HSA-6790901 rRNA modification in the nucle	R-HSA-8950505 Gene and protein expression by
Q9ULF5	57181	uniprot	H. sapiens	57181	H. sapiens	0.0	0.0	0.0	0.0	0.0	0.0	0.0	0.0	0.0	0.0	0.0	0.0	0.0	0.0	0.0	0.0	0.0	0.0	0.0	0.0
P62330	382	uniprot	H. sapiens	382	H. sapiens	0.0	0.0	0.0	0.0	1.0	0.0	0.0	0.0	0.0	0.0	0.0	0.0	0.0	1.0	0.0	0.0	0.0	0.0	0.0	0.0
Q96AG4	55379	uniprot	H. sapiens	55379	H. sapiens	0.0	0.0	0.0	0.0	0.0	0.0	0.0	0.0	0.0	0.0	0.0	0.0	0.0	0.0	0.0	0.0	0.0	0.0	0.0	0.0
P18887	7515	uniprot	H. sapiens	7515	H. sapiens	0.0	0.0	0.0	0.0	0.0	0.0	0.0	1.0	0.0	0.0	0.0	0.0	0.0	0.0	0.0	0.0	0.0	0.0	0.0	0.0
Q8N806	55148	uniprot	H. sapiens	55148	H. sapiens	0.0	0.0	0.0	0.0	0.0	0.0	0.0	0.0	0.0	0.0	0.0	0.0	0.0	0.0	0.0	0.0	0.0	0.0	0.0	0.0
Q9BXV9	84520	uniprot	H. sapiens	84520	H. sapiens	0.0	0.0	0.0	0.0	0.0	0.0	0.0	0.0	0.0	0.0	0.0	0.0	0.0	0.0	0.0	0.0	0.0	0.0	0.0	0.0
P46782	6193	uniprot	H. sapiens	6193	H. sapiens	1.0	1.0	0.0	0.0	0.0	0.0	0.0	0.0	0.0	0.0	0.0	0.0	0.0	0.0	0.0	0.0	0.0	0.0	0.0	0.0
Q9GZP4	57095	uniprot	H. sapiens	57095	H. sapiens	0.0	0.0	0.0	0.0	0.0	0.0	0.0	0.0	0.0	0.0	0.0	0.0	0.0	0.0	0.0	0.0	0.0	0.0	0.0	0.0
Q9P0K7	26064	uniprot	H. sapiens	26064	H. sapiens	0.0	0.0	0.0	0.0	0.0	0.0	0.0	0.0	0.0	0.0	0.0	0.0	0.0	0.0	0.0	0.0	0.0	0.0	0.0	0.0
Q9NXG2	55623	uniprot	H. sapiens	55623	H. sapiens	1.0	1.0	0.0	0.0	0.0	0.0	0.0	0.0	0.0	0.0	0.0	0.0	0.0	0.0	0.0	0.0	0.0	0.0	1.0	0.0
Q96I25	84991	uniprot	H. sapiens	84991	H. sapiens	1.0	0.0	0.0	0.0	0.0	0.0	0.0	0.0	0.0	0.0	0.0	0.0	0.0	0.0	0.0	0.0	0.0	0.0	0.0	0.0
A6NDG6	283871	uniprot	H. sapiens	283871	H. sapiens	0.0	0.0	0.0	0.0	0.0	0.0	0.0	0.0	0.0	0.0	1.0	0.0	0.0	0.0	0.0	0.0	0.0	0.0	0.0	0.0
Q96N66	79143	uniprot	H. sapiens	79143	H. sapiens	0.0	0.0	0.0	0.0	0.0	0.0	0.0	0.0	0.0	0.0	0.0	0.0	0.0	0.0	0.0	0.0	0.0	0.0	0.0	0.0
P62249	6217	uniprot	H. sapiens	6217	H. sapiens	1.0	1.0	0.0	0.0	0.0	0.0	0.0	0.0	0.0	0.0	0.0	0.0	0.0	0.0	0.0	0.0	0.0	0.0	0.0	0.0
Q99536	10493	uniprot	H. sapiens	10493	H. sapiens	0.0	0.0	0.0	0.0	0.0	0.0	1.0	0.0	0.0	0.0	0.0	0.0	0.0	0.0	0.0	0.0	0.0	0.0	0.0	0.0
P46779	6158	uniprot	H. sapiens	6158	H. sapiens	1.0	1.0	0.0	0.0	0.0	0.0	0.0	0.0	0.0	0.0	0.0	0.0	0.0	0.0	0.0	0.0	0.0	0.0	0.0	0.0
P62273	6235	uniprot	H. sapiens	6235	H. sapiens	1.0	1.0	0.0	0.0	0.0	0.0	0.0	0.0	0.0	0.0	0.0	0.0	0.0	0.0	0.0	0.0	0.0	0.0	0.0	0.0
Q14376	2582	uniprot	H. sapiens	2582	H. sapiens	0.0	0.0	0.0	0.0	0.0	0.0	0.0	0.0	0.0	0.0	1.0	0.0	0.0	0.0	0.0	0.0	0.0	0.0	0.0	0.0
Q6P4I2	84942	uniprot	H. sapiens	84942	H. sapiens	0.0	0.0	0.0	0.0	0.0	0.0	0.0	0.0	0.0	0.0	0.0	0.0	0.0	0.0	0.0	0.0	0.0	0.0	0.0	0.0
O76070	6623	uniprot	H. sapiens	6623	H. sapiens	0.0	0.0	0.0	0.0	0.0	0.0	0.0	0.0	0.0	0.0	0.0	0.0	0.0	0.0	0.0	0.0	0.0	0.0	0.0	0.0
P26368	11338	uniprot	H. sapiens	11338	H. sapiens	0.0	0.0	0.0	0.0	0.0	0.0	0.0	0.0	0.0	0.0	0.0	0.0	0.0	0.0	0.0	0.0	0.0	0.0	0.0	0.0
Q96KP4	55748	uniprot	H. sapiens	55748	H. sapiens	0.0	0.0	0.0	0.0	0.0	0.0	0.0	0.0	0.0	0.0	0.0	0.0	0.0	0.0	0.0	0.0	0.0	0.0	0.0	0.0
Q9GZR2	57109	uniprot	H. sapiens	57109	H. sapiens	0.0	0.0	0.0	0.0	0.0	0.0	0.0	0.0	0.0	0.0	0.0	0.0	0.0	0.0	0.0	0.0	0.0	0.0	0.0	0.0
Q96A35	79590	uniprot	H. sapiens	79590	H. sapiens	0.0	1.0	0.0	0.0	0.0	0.0	0.0	0.0	0.0	0.0	0.0	0.0	1.0	0.0	0.0	0.0	0.0	0.0	0.0	0.0
Q8TED0	84135	uniprot	H. sapiens	84135	H. sapiens	1.0	1.0	0.0	0.0	0.0	0.0	0.0	0.0	0.0	0.0	0.0	0.0	0.0	0.0	0.0	0.0	0.0	0.0	1.0	0.0
Q9UNS2	8533	uniprot	H. sapiens	8533	H. sapiens	0.0	0.0	0.0	0.0	1.0	1.0	0.0	1.0	0.0	0.0	0.0	0.0	0.0	0.0	0.0	0.0	0.0	0.0	0.0	0.0
P37198	23636	uniprot	H. sapiens	23636	H. sapiens	1.0	1.0	1.0	1.0	0.0	1.0	0.0	0.0	0.0	1.0	1.0	0.0	0.0	0.0	0.0	0.0	0.0	0.0	0.0	0.0
O15379	8841	uniprot	H. sapiens	8841	H. sapiens	0.0	1.0	1.0	0.0	0.0	1.0	0.0	0.0	0.0	0.0	1.0	0.0	0.0	1.0	0.0	0.0	0.0	0.0	0.0	0.0
P62263	6208	uniprot	H. sapiens	6208	H. sapiens	1.0	1.0	0.0	0.0	0.0	0.0	0.0	0.0	0.0	0.0	0.0	0.0	0.0	0.0	0.0	0.0	0.0	0.0	1.0	0.0
Q08211	1660	uniprot	H. sapiens	1660	H. sapiens	1.0	0.0	0.0	0.0	0.0	1.0	0.0	0.0	0.0	0.0	1.0	0.0	0.0	0.0	0.0	0.0	0.0	0.0	0.0	0.0
Q9NW64	55696	uniprot	H. sapiens	55696	H. sapiens	1.0	0.0	0.0	0.0	0.0	0.0	0.0	0.0	0.0	0.0	0.0	0.0	0.0	0.0	0.0	0.0	0.0	0.0	0.0	0.0
O60341	23028	uniprot	H. sapiens	23028	H. sapiens	0.0	0.0	0.0	0.0	0.0	0.0	0.0	0.0	0.0	0.0	0.0	0.0	0.0	0.0	0.0	0.0	0.0	0.0	0.0	0.0
Q9NVE7	55229	uniprot	H. sapiens	55229	H. sapiens	0.0	0.0	0.0	0.0	0.0	0.0	0.0	0.0	0.0	0.0	0.0	0.0	0.0	0.0	0.0	0.0	0.0	0.0	0.0	0.0
Q14974	3837	uniprot	H. sapiens	3837	H. sapiens	0.0	0.0	0.0	0.0	0.0	0.0	0.0	0.0	0.0	0.0	0.0	0.0	0.0	0.0	0.0	0.0	0.0	0.0	0.0	0.0
P30405	10105	uniprot	H. sapiens	10105	H. sapiens	0.0	0.0	0.0	0.0	0.0	0.0	0.0	0.0	0.0	0.0	0.0	0.0	0.0	0.0	0.0	0.0	0.0	0.0	0.0	0.0
Q5UCC4	284361	uniprot	H. sapiens	284361	H. sapiens	0.0	0.0	0.0	0.0	0.0	0.0	0.0	0.0	0.0	0.0	0.0	0.0	0.0	0.0	0.0	0.0	0.0	0.0	0.0	0.0
Q13131	5562	uniprot	H. sapiens	5562	H. sapiens	0.0	0.0	0.0	0.0	0.0	0.0	0.0	1.0	0.0	0.0	0.0	0.0	0.0	0.0	0.0	0.0	0.0	0.0	0.0	0.0
Q9UHQ9	51706	uniprot	H. sapiens	51706	H. sapiens	0.0	0.0	0.0	0.0	0.0	0.0	0.0	0.0	0.0	0.0	0.0	0.0	0.0	0.0	0.0	0.0	0.0	0.0	0.0	0.0
Q9P000	29099	uniprot	H. sapiens	29099	H. sapiens	0.0	0.0	0.0	0.0	0.0	1.0	1.0	0.0	0.0	0.0	0.0	0.0	0.0	0.0	0.0	0.0	0.0	0.0	0.0	0.0
Q9NQG5	58490	uniprot	H. sapiens	58490	H. sapiens	0.0	0.0	1.0	0.0	0.0	0.0	0.0	0.0	0.0	0.0	0.0	0.0	0.0	0.0	0.0	0.0	0.0	0.0	0.0	0.0
P46926	10007	uniprot	H. sapiens	10007	H. sapiens	0.0	0.0	0.0	0.0	0.0	0.0	0.0	0.0	0.0	0.0	1.0	0.0	0.0	0.0	0.0	0.0	0.0	0.0	0.0	0.0
Q9UNF0	11252	uniprot	H. sapiens	11252	H. sapiens	0.0	0.0	0.0	0.0	1.0	0.0	0.0	0.0	0.0	0.0	0.0	0.0	0.0	0.0	0.0	0.0	0.0	0.0	0.0	0.0
Q9NWB6	55082	uniprot	H. sapiens	55082	H. sapiens	0.0	0.0	0.0	0.0	0.0	0.0	0.0	0.0	0.0	0.0	0.0	0.0	0.0	0.0	0.0	0.0	0.0	0.0	0.0	0.0
Q8N1F7	9688	uniprot	H. sapiens	9688	H. sapiens	1.0	1.0	1.0	1.0	0.0	1.0	0.0	0.0	0.0	1.0	1.0	0.0	0.0	0.0	0.0	0.0	0.0	0.0	0.0	0.0
Q6PD62	9646	uniprot	H. sapiens	9646	H. sapiens	0.0	0.0	1.0	0.0	0.0	0.0	0.0	0.0	0.0	0.0	0.0	0.0	0.0	0.0	0.0	0.0	0.0	0.0	0.0	0.0
P11047	3915	uniprot	H. sapiens	3915	H. sapiens	0.0	1.0	0.0	0.0	0.0	0.0	0.0	0.0	0.0	0.0	0.0	0.0	0.0	1.0	0.0	0.0	0.0	0.0	0.0	0.0
P51452	1845	uniprot	H. sapiens	1845	H. sapiens	0.0	0.0	0.0	0.0	0.0	1.0	0.0	0.0	0.0	0.0	0.0	0.0	0.0	1.0	0.0	0.0	0.0	0.0	0.0	0.0
Q9NXV2	54442	uniprot	H. sapiens	54442	H. sapiens	0.0	0.0	0.0	0.0	0.0	0.0	0.0	0.0	0.0	0.0	0.0	0.0	0.0	0.0	0.0	0.0	0.0	0.0	0.0	0.0
Q01130	6427	uniprot	H. sapiens	6427	H. sapiens	1.0	0.0	1.0	0.0	0.0	0.0	0.0	0.0	0.0	1.0	0.0	0.0	0.0	0.0	0.0	0.0	0.0	0.0	0.0	0.0
Q09161	4686	uniprot	H. sapiens	4686	H. sapiens	1.0	1.0	1.0	0.0	0.0	0.0	0.0	0.0	0.0	1.0	1.0	0.0	0.0	1.0	0.0	0.0	0.0	0.0	0.0	0.0
Q09666	79026	uniprot	H. sapiens	79026	H. sapiens	0.0	0.0	0.0	0.0	0.0	0.0	0.0	0.0	0.0	0.0	0.0	0.0	0.0	0.0	0.0	0.0	0.0	0.0	0.0	0.0
Q14004	8621	uniprot	H. sapiens	8621	H. sapiens	0.0	0.0	1.0	0.0	0.0	0.0	1.0	1.0	0.0	0.0	0.0	0.0	0.0	0.0	0.0	0.0	0.0	0.0	0.0	0.0
O43572	11216	uniprot	H. sapiens	11216	H. sapiens	0.0	0.0	0.0	0.0	0.0	0.0	0.0	0.0	0.0	0.0	0.0	0.0	0.0	0.0	0.0	0.0	0.0	0.0	0.0	0.0
P49840	2931	uniprot	H. sapiens	2931	H. sapiens	0.0	1.0	0.0	0.0	0.0	1.0	0.0	0.0	0.0	0.0	0.0	0.0	0.0	1.0	0.0	0.0	1.0	1.0	0.0	0.0
Q01664	7023	uniprot	H. sapiens	7023	H. sapiens	0.0	0.0	0.0	0.0	0.0	0.0	0.0	0.0	0.0	0.0	0.0	0.0	0.0	0.0	0.0	0.0	0.0	0.0	0.0	0.0
P50213	3419	uniprot	H. sapiens	3419	H. sapiens	0.0	0.0	0.0	0.0	0.0	0.0	0.0	0.0	0.0	0.0	0.0	1.0	0.0	0.0	1.0	0.0	0.0	0.0	0.0	0.0
Q9HC36	55178	uniprot	H. sapiens	55178	H. sapiens	1.0	1.0	0.0	0.0	0.0	0.0	0.0	0.0	0.0	0.0	0.0	0.0	0.0	0.0	0.0	0.0	0.0	0.0	0.0	0.0
Q8TF05	9989	uniprot	H. sapiens	9989	H. sapiens	0.0	0.0	0.0	0.0	0.0	0.0	0.0	0.0	0.0	0.0	0.0	0.0	0.0	0.0	0.0	0.0	0.0	0.0	0.0	0.0
Q13895	705	uniprot	H. sapiens	705	H. sapiens	1.0	1.0	0.0	0.0	0.0	0.0	0.0	0.0	0.0	0.0	0.0	0.0	0.0	0.0	0.0	0.0	0.0	0.0	0.0	0.0
P22033	4594	uniprot	H. sapiens	4594	H. sapiens	0.0	0.0	0.0	0.0	0.0	0.0	0.0	0.0	0.0	0.0	0.0	0.0	0.0	0.0	0.0	0.0	0.0	0.0	0.0	0.0
O15400	8417	uniprot	H. sapiens	8417	H. sapiens	0.0	0.0	0.0	0.0	0.0	0.0	0.0	0.0	0.0	0.0	0.0	0.0	0.0	0.0	0.0	0.0	0.0	0.0	0.0	0.0
P62917	6132	uniprot	H. sapiens	6132	H. sapiens	1.0	1.0	0.0	0.0	0.0	0.0	0.0	0.0	0.0	0.0	0.0	0.0	0.0	0.0	0.0	0.0	0.0	0.0	0.0	0.0
P38646	3313	uniprot	H. sapiens	3313	H. sapiens	0.0	1.0	0.0	0.0	0.0	1.0	0.0	0.0	0.0	0.0	1.0	1.0	0.0	0.0	1.0	0.0	0.0	0.0	0.0	1.0
O60216	5885	uniprot	H. sapiens	5885	H. sapiens	0.0	0.0	1.0	1.0	0.0	1.0	0.0	0.0	0.0	0.0	1.0	0.0	0.0	0.0	0.0	0.0	0.0	0.0	0.0	0.0
Q13438	10956	uniprot	H. sapiens	10956	H. sapiens	0.0	0.0	0.0	0.0	1.0	1.0	0.0	0.0	0.0	0.0	0.0	0.0	0.0	1.0	0.0	0.0	0.0	1.0	0.0	0.0
Q8IXM3	64975	uniprot	H. sapiens	64975	H. sapiens	0.0	1.0	0.0	0.0	0.0	0.0	0.0	0.0	0.0	0.0	0.0	0.0	1.0	0.0	0.0	0.0	0.0	0.0	0.0	0.0
Q2TAA2	285148	uniprot	H. sapiens	285148	H. sapiens	0.0	0.0	0.0	0.0	0.0	0.0	0.0	0.0	0.0	0.0	0.0	0.0	0.0	0.0	0.0	0.0	0.0	0.0	0.0	0.0
Q99747	8774	uniprot	H. sapiens	8774	H. sapiens	0.0	0.0	0.0	0.0	1.0	0.0	0.0	0.0	0.0	0.0	0.0	0.0	0.0	0.0	0.0	0.0	0.0	0.0	0.0	0.0
Q9NQT5	51010	uniprot	H. sapiens	51010	H. sapiens	1.0	1.0	0.0	0.0	0.0	1.0	0.0	0.0	0.0	0.0	0.0	0.0	0.0	0.0	0.0	0.0	1.0	0.0	0.0	0.0
P61011	6729	uniprot	H. sapiens	6729	H. sapiens	0.0	1.0	0.0	0.0	0.0	0.0	0.0	0.0	0.0	0.0	0.0	0.0	0.0	0.0	0.0	0.0	0.0	0.0	0.0	0.0
Q6GQQ9	56957	uniprot	H. sapiens	56957	H. sapiens	0.0	0.0	0.0	0.0	0.0	0.0	0.0	0.0	0.0	0.0	0.0	0.0	0.0	0.0	0.0	0.0	0.0	0.0	0.0	0.0
O95433	10598	uniprot	H. sapiens	10598	H. sapiens	0.0	0.0	0.0	0.0	0.0	0.0	0.0	0.0	0.0	0.0	0.0	0.0	0.0	0.0	0.0	0.0	0.0	0.0	0.0	0.0
Q6ICG6	23313	uniprot	H. sapiens	23313	H. sapiens	0.0	0.0	0.0	0.0	0.0	0.0	0.0	0.0	0.0	0.0	0.0	0.0	0.0	0.0	0.0	0.0	0.0	0.0	0.0	0.0
Q9UH65	23075	uniprot	H. sapiens	23075	H. sapiens	0.0	0.0	0.0	0.0	0.0	0.0	0.0	0.0	1.0	0.0	0.0	0.0	0.0	0.0	0.0	0.0	0.0	0.0	0.0	0.0
O95571	23474	uniprot	H. sapiens	23474	H. sapiens	0.0	1.0	0.0	0.0	0.0	0.0	0.0	0.0	0.0	0.0	0.0	0.0	0.0	0.0	0.0	0.0	0.0	0.0	0.0	0.0
Q9Y3E5	51651	uniprot	H. sapiens	51651	H. sapiens	0.0	0.0	0.0	0.0	0.0	1.0	0.0	0.0	0.0	0.0	0.0	0.0	0.0	0.0	0.0	0.0	0.0	0.0	0.0	0.0
Q3YEC7	55684	uniprot	H. sapiens	55684	H. sapiens	0.0	0.0	0.0	0.0	0.0	0.0	0.0	0.0	0.0	0.0	0.0	0.0	0.0	0.0	0.0	0.0	0.0	0.0	0.0	0.0
P48634	7916	uniprot	H. sapiens	7916	H. sapiens	0.0	0.0	0.0	0.0	0.0	0.0	0.0	0.0	0.0	0.0	0.0	0.0	0.0	0.0	0.0	0.0	0.0	0.0	0.0	0.0
Q13123	3550	uniprot	H. sapiens	3550	H. sapiens	1.0	0.0	0.0	0.0	0.0	0.0	0.0	0.0	0.0	0.0	0.0	0.0	0.0	0.0	0.0	0.0	0.0	0.0	0.0	0.0
P68371	10383	uniprot	H. sapiens	10383	H. sapiens	0.0	1.0	0.0	1.0	1.0	1.0	1.0	0.0	1.0	0.0	1.0	0.0	0.0	0.0	0.0	0.0	0.0	0.0	0.0	0.0
P19404	4729	uniprot	H. sapiens	4729	H. sapiens	0.0	0.0	0.0	0.0	0.0	0.0	0.0	0.0	0.0	0.0	0.0	0.0	0.0	0.0	1.0	0.0	0.0	0.0	0.0	0.0
Q9NP92	10884	uniprot	H. sapiens	10884	H. sapiens	0.0	1.0	0.0	0.0	0.0	0.0	0.0	0.0	0.0	0.0	0.0	0.0	1.0	0.0	0.0	0.0	0.0	0.0	0.0	0.0
O75312	8882	uniprot	H. sapiens	8882	H. sapiens	0.0	0.0	0.0	0.0	0.0	0.0	0.0	0.0	0.0	0.0	0.0	0.0	0.0	0.0	0.0	0.0	0.0	0.0	0.0	0.0
O75489	4722	uniprot	H. sapiens	4722	H. sapiens	0.0	0.0	0.0	0.0	0.0	0.0	0.0	0.0	1.0	0.0	0.0	1.0	0.0	0.0	1.0	0.0	0.0	0.0	0.0	0.0
P82921	54460	uniprot	H. sapiens	54460	H. sapiens	0.0	1.0	0.0	0.0	0.0	0.0	0.0	0.0	0.0	0.0	0.0	0.0	1.0	0.0	0.0	0.0	0.0	0.0	0.0	0.0
P11387	7150	uniprot	H. sapiens	7150	H. sapiens	0.0	0.0	0.0	0.0	0.0	0.0	0.0	0.0	0.0	0.0	1.0	0.0	0.0	0.0	0.0	0.0	0.0	0.0	0.0	0.0
P11021	3309	uniprot	H. sapiens	3309	H. sapiens	0.0	1.0	0.0	0.0	0.0	1.0	0.0	0.0	0.0	0.0	1.0	0.0	0.0	0.0	0.0	0.0	1.0	0.0	0.0	0.0
P32969	6133	uniprot	H. sapiens	6133	H. sapiens	1.0	1.0	0.0	0.0	0.0	0.0	0.0	0.0	0.0	0.0	0.0	0.0	0.0	0.0	0.0	0.0	0.0	0.0	0.0	0.0
Q9BT73	84262	uniprot	H. sapiens	84262	H. sapiens	0.0	0.0	0.0	0.0	0.0	1.0	0.0	0.0	0.0	0.0	0.0	0.0	0.0	0.0	0.0	0.0	0.0	0.0	0.0	0.0
Q9HCU5	10113	uniprot	H. sapiens	10113	H. sapiens	0.0	1.0	0.0	0.0	1.0	0.0	0.0	0.0	0.0	0.0	0.0	0.0	0.0	0.0	0.0	0.0	1.0	0.0	0.0	0.0
Q8N5M4	283237	uniprot	H. sapiens	283237	H. sapiens	0.0	0.0	0.0	0.0	0.0	0.0	0.0	0.0	0.0	0.0	0.0	0.0	0.0	0.0	0.0	0.0	0.0	0.0	0.0	0.0
Q9UPT8	23211	uniprot	H. sapiens	23211	H. sapiens	0.0	0.0	0.0	0.0	0.0	0.0	0.0	0.0	0.0	0.0	0.0	0.0	0.0	0.0	0.0	0.0	0.0	0.0	0.0	0.0
Q5SRE5	23511	uniprot	H. sapiens	23511	H. sapiens	1.0	1.0	1.0	1.0	0.0	1.0	0.0	0.0	0.0	1.0	1.0	0.0	0.0	0.0	0.0	0.0	0.0	0.0	0.0	0.0
Q5SY16	79707	uniprot	H. sapiens	79707	H. sapiens	1.0	1.0	0.0	0.0	0.0	0.0	0.0	0.0	0.0	0.0	0.0	0.0	0.0	0.0	0.0	0.0	0.0	0.0	0.0	0.0
Q12769	23279	uniprot	H. sapiens	23279	H. sapiens	1.0	1.0	1.0	1.0	0.0	1.0	0.0	0.0	1.0	1.0	1.0	0.0	0.0	0.0	0.0	0.0	0.0	0.0	0.0	0.0
P49711	10664	uniprot	H. sapiens	10664	H. sapiens	0.0	0.0	0.0	0.0	0.0	0.0	0.0	0.0	0.0	0.0	0.0	0.0	0.0	0.0	0.0	0.0	0.0	0.0	0.0	0.0
P00491	4860	uniprot	H. sapiens	4860	H. sapiens	0.0	0.0	0.0	0.0	0.0	0.0	1.0	0.0	0.0	0.0	0.0	0.0	0.0	0.0	0.0	1.0	0.0	0.0	0.0	0.0
O95619	8089	uniprot	H. sapiens	8089	H. sapiens	0.0	0.0	0.0	0.0	0.0	0.0	0.0	0.0	0.0	0.0	0.0	0.0	0.0	0.0	0.0	0.0	0.0	0.0	0.0	0.0
O43805	8636	uniprot	H. sapiens	8636	H. sapiens	0.0	0.0	0.0	1.0	0.0	1.0	0.0	0.0	0.0	0.0	0.0	0.0	0.0	0.0	0.0	0.0	0.0	0.0	0.0	0.0
Q9NRL2	11177	uniprot	H. sapiens	11177	H. sapiens	0.0	0.0	0.0	0.0	0.0	0.0	0.0	0.0	0.0	0.0	0.0	0.0	0.0	0.0	0.0	0.0	0.0	0.0	0.0	0.0
Q99497	11315	uniprot	H. sapiens	11315	H. sapiens	0.0	0.0	0.0	0.0	0.0	0.0	0.0	0.0	0.0	0.0	1.0	0.0	0.0	0.0	0.0	0.0	0.0	0.0	0.0	0.0
O43660	5356	uniprot	H. sapiens	5356	H. sapiens	1.0	0.0	0.0	0.0	0.0	0.0	0.0	0.0	0.0	0.0	0.0	0.0	0.0	0.0	0.0	0.0	0.0	0.0	0.0	0.0
O00148	10212	uniprot	H. sapiens	10212	H. sapiens	1.0	0.0	0.0	0.0	0.0	0.0	0.0	0.0	0.0	1.0	0.0	0.0	0.0	0.0	0.0	0.0	0.0	0.0	0.0	0.0
O43818	9136	uniprot	H. sapiens	9136	H. sapiens	1.0	1.0	0.0	0.0	0.0	0.0	0.0	0.0	0.0	0.0	0.0	0.0	0.0	0.0	0.0	0.0	0.0	0.0	1.0	0.0
P46976	2992	uniprot	H. sapiens	2992	H. sapiens	0.0	0.0	0.0	0.0	0.0	0.0	1.0	0.0	0.0	0.0	1.0	0.0	0.0	0.0	0.0	0.0	0.0	0.0	0.0	0.0
Q9UM13	10393	uniprot	H. sapiens	10393	H. sapiens	0.0	1.0	0.0	1.0	0.0	1.0	0.0	0.0	0.0	0.0	0.0	0.0	0.0	0.0	0.0	0.0	0.0	0.0	0.0	0.0
Q9UDY4	11080	uniprot	H. sapiens	11080	H. sapiens	0.0	0.0	0.0	0.0	0.0	0.0	0.0	0.0	0.0	0.0	0.0	0.0	0.0	0.0	0.0	0.0	0.0	0.0	0.0	0.0
O75937	22826	uniprot	H. sapiens	22826	H. sapiens	1.0	0.0	0.0	0.0	0.0	0.0	0.0	0.0	0.0	0.0	0.0	0.0	0.0	0.0	0.0	0.0	0.0	0.0	0.0	0.0
P28070	5692	uniprot	H. sapiens	5692	H. sapiens	1.0	1.0	1.0	1.0	0.0	1.0	0.0	0.0	0.0	0.0	0.0	0.0	0.0	1.0	0.0	0.0	0.0	0.0	0.0	0.0
P49257	3998	uniprot	H. sapiens	3998	H. sapiens	0.0	0.0	0.0	0.0	1.0	0.0	0.0	0.0	1.0	0.0	0.0	0.0	0.0	0.0	0.0	0.0	0.0	0.0	0.0	0.0
O00469	5352	uniprot	H. sapiens	5352	H. sapiens	0.0	0.0	0.0	0.0	0.0	0.0	0.0	0.0	0.0	0.0	0.0	0.0	0.0	0.0	0.0	0.0	0.0	0.0	0.0	0.0
P61981	7532	uniprot	H. sapiens	7532	H. sapiens	0.0	1.0	0.0	1.0	1.0	1.0	0.0	1.0	1.0	0.0	0.0	0.0	0.0	0.0	0.0	0.0	0.0	0.0	0.0	0.0
O95159	7542	uniprot	H. sapiens	7542	H. sapiens	0.0	0.0	0.0	0.0	0.0	0.0	0.0	0.0	0.0	0.0	0.0	0.0	0.0	0.0	0.0	0.0	0.0	0.0	0.0	0.0
Q15428	8175	uniprot	H. sapiens	8175	H. sapiens	1.0	0.0	0.0	0.0	0.0	0.0	0.0	0.0	0.0	0.0	0.0	0.0	0.0	0.0	0.0	0.0	0.0	0.0	0.0	0.0
P84098	6143	uniprot	H. sapiens	6143	H. sapiens	1.0	1.0	0.0	0.0	0.0	0.0	0.0	0.0	0.0	0.0	0.0	0.0	0.0	0.0	0.0	0.0	0.0	0.0	0.0	0.0
Q9NVJ2	55207	uniprot	H. sapiens	55207	H. sapiens	0.0	0.0	0.0	0.0	0.0	0.0	0.0	0.0	0.0	0.0	0.0	0.0	0.0	0.0	0.0	0.0	0.0	0.0	0.0	0.0
P06280	2717	uniprot	H. sapiens	2717	H. sapiens	0.0	0.0	0.0	0.0	0.0	0.0	1.0	0.0	0.0	0.0	0.0	0.0	0.0	0.0	0.0	0.0	0.0	0.0	0.0	0.0
Q01804	54726	uniprot	H. sapiens	54726	H. sapiens	0.0	0.0	0.0	0.0	0.0	0.0	0.0	0.0	0.0	0.0	0.0	0.0	0.0	0.0	0.0	0.0	0.0	0.0	0.0	0.0
Q9HB40	59342	uniprot	H. sapiens	59342	H. sapiens	0.0	0.0	0.0	0.0	0.0	0.0	0.0	0.0	0.0	0.0	0.0	0.0	0.0	0.0	0.0	0.0	0.0	0.0	0.0	0.0
Q14258	7706	uniprot	H. sapiens	7706	H. sapiens	0.0	1.0	0.0	0.0	0.0	1.0	0.0	1.0	0.0	0.0	1.0	0.0	0.0	0.0	0.0	0.0	0.0	0.0	0.0	0.0
Q9UII2	93974	uniprot	H. sapiens	93974	H. sapiens	0.0	0.0	0.0	0.0	0.0	0.0	0.0	0.0	0.0	0.0	0.0	0.0	0.0	0.0	0.0	0.0	0.0	0.0	0.0	0.0
O14907	30851	uniprot	H. sapiens	30851	H. sapiens	0.0	0.0	0.0	1.0	0.0	0.0	0.0	0.0	1.0	0.0	0.0	0.0	0.0	0.0	0.0	0.0	0.0	0.0	0.0	0.0
Q8NE86	90550	uniprot	H. sapiens	90550	H. sapiens	0.0	0.0	0.0	0.0	0.0	0.0	0.0	0.0	0.0	0.0	0.0	0.0	0.0	0.0	0.0	0.0	0.0	0.0	0.0	0.0
P15927	6118	uniprot	H. sapiens	6118	H. sapiens	0.0	1.0	0.0	1.0	0.0	1.0	0.0	1.0	0.0	0.0	1.0	0.0	0.0	0.0	0.0	0.0	0.0	0.0	0.0	0.0
Q9H488	23509	uniprot	H. sapiens	23509	H. sapiens	0.0	0.0	0.0	0.0	0.0	1.0	0.0	0.0	0.0	0.0	0.0	0.0	0.0	0.0	0.0	0.0	0.0	0.0	0.0	0.0
P28072	5694	uniprot	H. sapiens	5694	H. sapiens	1.0	1.0	1.0	1.0	0.0	1.0	0.0	0.0	0.0	0.0	0.0	0.0	0.0	1.0	0.0	0.0	0.0	0.0	0.0	0.0
Q15397	9933	uniprot	H. sapiens	9933	H. sapiens	0.0	0.0	0.0	0.0	0.0	0.0	0.0	0.0	0.0	0.0	0.0	0.0	0.0	0.0	0.0	0.0	0.0	0.0	0.0	0.0
P50750	1025	uniprot	H. sapiens	1025	H. sapiens	0.0	1.0	1.0	0.0	0.0	1.0	0.0	1.0	0.0	0.0	0.0	0.0	0.0	0.0	0.0	0.0	0.0	0.0	0.0	0.0
Q9Y2Q9	28957	uniprot	H. sapiens	28957	H. sapiens	0.0	1.0	0.0	0.0	0.0	0.0	0.0	0.0	0.0	0.0	0.0	0.0	1.0	0.0	0.0	0.0	0.0	0.0	0.0	0.0
P12236	293	uniprot	H. sapiens	293	H. sapiens	0.0	0.0	0.0	0.0	0.0	0.0	0.0	0.0	0.0	0.0	0.0	0.0	0.0	0.0	0.0	0.0	0.0	0.0	0.0	0.0
Q8TEQ6	25929	uniprot	H. sapiens	25929	H. sapiens	1.0	1.0	0.0	0.0	0.0	0.0	0.0	0.0	0.0	0.0	1.0	0.0	0.0	0.0	0.0	0.0	0.0	0.0	0.0	0.0
Q13144	8893	uniprot	H. sapiens	8893	H. sapiens	0.0	1.0	0.0	0.0	0.0	0.0	0.0	0.0	0.0	0.0	0.0	0.0	0.0	0.0	0.0	0.0	0.0	0.0	0.0	0.0
P26373	6137	uniprot	H. sapiens	6137	H. sapiens	1.0	1.0	0.0	0.0	0.0	0.0	0.0	0.0	0.0	0.0	0.0	0.0	0.0	0.0	0.0	0.0	0.0	0.0	0.0	0.0
Q92934	572	uniprot	H. sapiens	572	H. sapiens	0.0	0.0	0.0	0.0	0.0	1.0	0.0	0.0	0.0	0.0	0.0	0.0	0.0	1.0	0.0	0.0	0.0	0.0	0.0	0.0
Q9GZM5	25844	uniprot	H. sapiens	25844	H. sapiens	0.0	0.0	0.0	0.0	0.0	0.0	0.0	0.0	0.0	0.0	0.0	0.0	0.0	0.0	0.0	0.0	0.0	0.0	0.0	0.0
Q9BUL5	79142	uniprot	H. sapiens	79142	H. sapiens	0.0	0.0	0.0	0.0	0.0	0.0	0.0	0.0	0.0	0.0	0.0	0.0	0.0	0.0	0.0	0.0	0.0	0.0	0.0	0.0
Q9BPX6	10367	uniprot	H. sapiens	10367	H. sapiens	0.0	0.0	0.0	0.0	0.0	0.0	0.0	0.0	0.0	0.0	0.0	0.0	0.0	0.0	0.0	0.0	0.0	0.0	0.0	0.0
Q9Y6D6	10565	uniprot	H. sapiens	10565	H. sapiens	0.0	0.0	0.0	0.0	0.0	0.0	0.0	0.0	0.0	0.0	0.0	0.0	0.0	0.0	0.0	0.0	0.0	0.0	0.0	0.0
Q96CW1	1173	uniprot	H. sapiens	1173	H. sapiens	0.0	0.0	0.0	0.0	0.0	0.0	0.0	0.0	0.0	0.0	0.0	0.0	0.0	0.0	0.0	0.0	0.0	0.0	0.0	0.0
P61457	5092	uniprot	H. sapiens	5092	H. sapiens	0.0	1.0	0.0	0.0	0.0	0.0	0.0	0.0	0.0	0.0	0.0	0.0	0.0	0.0	0.0	0.0	0.0	0.0	0.0	0.0
Q9NX08	54951	uniprot	H. sapiens	54951	H. sapiens	0.0	0.0	0.0	0.0	0.0	1.0	0.0	0.0	0.0	0.0	0.0	0.0	0.0	0.0	0.0	0.0	0.0	0.0	0.0	0.0
O95470	8879	uniprot	H. sapiens	8879	H. sapiens	0.0	0.0	0.0	0.0	0.0	0.0	0.0	0.0	0.0	0.0	0.0	0.0	0.0	0.0	0.0	0.0	0.0	0.0	0.0	0.0
Q9BZG1	83871	uniprot	H. sapiens	83871	H. sapiens	0.0	0.0	0.0	0.0	0.0	0.0	0.0	0.0	0.0	0.0	0.0	0.0	0.0	0.0	0.0	0.0	0.0	0.0	0.0	0.0
P31153	4144	uniprot	H. sapiens	4144	H. sapiens	0.0	0.0	0.0	0.0	0.0	0.0	0.0	0.0	0.0	0.0	0.0	0.0	0.0	0.0	0.0	0.0	0.0	0.0	0.0	0.0
Q9H0U6	29074	uniprot	H. sapiens	29074	H. sapiens	0.0	1.0	0.0	0.0	0.0	0.0	0.0	0.0	0.0	0.0	0.0	0.0	1.0	0.0	0.0	0.0	0.0	0.0	0.0	0.0
Q15050	23212	uniprot	H. sapiens	23212	H. sapiens	0.0	0.0	0.0	0.0	0.0	0.0	0.0	0.0	0.0	0.0	0.0	0.0	0.0	0.0	0.0	0.0	0.0	0.0	0.0	0.0
Q13247	6431	uniprot	H. sapiens	6431	H. sapiens	1.0	0.0	1.0	0.0	0.0	0.0	0.0	0.0	0.0	1.0	0.0	0.0	0.0	0.0	0.0	0.0	0.0	0.0	0.0	0.0
Q04206	5970	uniprot	H. sapiens	5970	H. sapiens	0.0	0.0	0.0	0.0	0.0	0.0	0.0	0.0	0.0	0.0	0.0	0.0	0.0	0.0	0.0	0.0	0.0	0.0	0.0	0.0
Q01658	1810	uniprot	H. sapiens	1810	H. sapiens	0.0	0.0	0.0	0.0	0.0	0.0	0.0	0.0	0.0	0.0	0.0	0.0	0.0	0.0	0.0	0.0	0.0	0.0	0.0	0.0
O43592	11260	uniprot	H. sapiens	11260	H. sapiens	1.0	0.0	0.0	0.0	0.0	0.0	0.0	0.0	0.0	0.0	1.0	0.0	0.0	0.0	0.0	0.0	0.0	0.0	0.0	0.0
Q13033	29966	uniprot	H. sapiens	29966	H. sapiens	0.0	0.0	0.0	0.0	0.0	0.0	0.0	0.0	0.0	0.0	0.0	0.0	0.0	0.0	0.0	0.0	0.0	0.0	0.0	0.0
Q14197	3396	uniprot	H. sapiens	3396	H. sapiens	0.0	1.0	0.0	0.0	0.0	0.0	0.0	0.0	0.0	0.0	0.0	0.0	1.0	0.0	0.0	0.0	0.0	0.0	0.0	0.0
Q9NXV6	55602	uniprot	H. sapiens	55602	H. sapiens	0.0	0.0	0.0	0.0	0.0	0.0	0.0	0.0	0.0	0.0	0.0	0.0	0.0	0.0	0.0	0.0	0.0	0.0	0.0	0.0
P53597	8802	uniprot	H. sapiens	8802	H. sapiens	0.0	0.0	0.0	0.0	0.0	0.0	0.0	0.0	0.0	0.0	0.0	1.0	0.0	0.0	1.0	0.0	0.0	0.0	0.0	0.0
Q9UNE7	10273	uniprot	H. sapiens	10273	H. sapiens	0.0	0.0	0.0	0.0	0.0	0.0	0.0	0.0	0.0	0.0	0.0	0.0	0.0	0.0	0.0	0.0	0.0	0.0	0.0	0.0
O76071	9391	uniprot	H. sapiens	9391	H. sapiens	0.0	0.0	0.0	0.0	0.0	0.0	0.0	0.0	0.0	0.0	0.0	0.0	0.0	0.0	0.0	0.0	0.0	0.0	0.0	0.0
Q9UI30	51504	uniprot	H. sapiens	51504	H. sapiens	1.0	1.0	0.0	0.0	0.0	0.0	0.0	0.0	0.0	0.0	1.0	0.0	0.0	0.0	0.0	0.0	0.0	0.0	1.0	0.0
Q9GZT8	60491	uniprot	H. sapiens	60491	H. sapiens	0.0	0.0	0.0	0.0	0.0	0.0	0.0	0.0	0.0	0.0	0.0	0.0	0.0	0.0	0.0	0.0	0.0	0.0	0.0	0.0
Q15056	7458	uniprot	H. sapiens	7458	H. sapiens	0.0	0.0	0.0	0.0	0.0	0.0	0.0	0.0	0.0	0.0	0.0	0.0	0.0	0.0	0.0	0.0	0.0	0.0	0.0	0.0
P00568	203	uniprot	H. sapiens	203	H. sapiens	0.0	0.0	0.0	0.0	0.0	0.0	0.0	0.0	0.0	0.0	0.0	0.0	0.0	0.0	0.0	1.0	0.0	0.0	0.0	0.0
O75351	9525	uniprot	H. sapiens	9525	H. sapiens	0.0	1.0	1.0	0.0	1.0	0.0	0.0	0.0	0.0	0.0	0.0	0.0	0.0	0.0	0.0	0.0	0.0	0.0	0.0	0.0
Q9BSH4	51204	uniprot	H. sapiens	51204	H. sapiens	0.0	0.0	0.0	0.0	0.0	0.0	0.0	0.0	0.0	0.0	0.0	0.0	0.0	0.0	1.0	0.0	0.0	0.0	0.0	0.0
Q9Y3S2	27309	uniprot	H. sapiens	27309	H. sapiens	0.0	0.0	0.0	0.0	0.0	0.0	0.0	0.0	0.0	0.0	0.0	0.0	0.0	0.0	0.0	0.0	0.0	0.0	0.0	0.0
Q99614	7265	uniprot	H. sapiens	7265	H. sapiens	0.0	0.0	0.0	0.0	0.0	0.0	0.0	0.0	0.0	0.0	0.0	0.0	0.0	0.0	0.0	0.0	0.0	0.0	0.0	0.0
P35754	2745	uniprot	H. sapiens	2745	H. sapiens	0.0	0.0	0.0	0.0	0.0	0.0	0.0	0.0	0.0	0.0	0.0	0.0	0.0	0.0	0.0	1.0	0.0	0.0	0.0	0.0
Q5T653	51069	uniprot	H. sapiens	51069	H. sapiens	0.0	1.0	0.0	0.0	0.0	0.0	0.0	0.0	0.0	0.0	0.0	0.0	1.0	0.0	0.0	0.0	0.0	0.0	0.0	0.0
Q02750	5604	uniprot	H. sapiens	5604	H. sapiens	0.0	1.0	0.0	0.0	0.0	1.0	0.0	0.0	0.0	0.0	0.0	0.0	0.0	1.0	0.0	0.0	0.0	0.0	0.0	0.0
Q9NYJ8	23118	uniprot	H. sapiens	23118	H. sapiens	0.0	1.0	0.0	0.0	0.0	1.0	0.0	0.0	0.0	0.0	1.0	0.0	0.0	1.0	0.0	0.0	0.0	0.0	0.0	0.0
Q9H299	83442	uniprot	H. sapiens	83442	H. sapiens	0.0	0.0	0.0	0.0	0.0	0.0	0.0	0.0	0.0	0.0	0.0	0.0	0.0	0.0	0.0	0.0	0.0	0.0	0.0	0.0
Q92783	8027	uniprot	H. sapiens	8027	H. sapiens	0.0	0.0	0.0	0.0	0.0	0.0	0.0	0.0	0.0	0.0	0.0	0.0	0.0	0.0	0.0	0.0	0.0	0.0	0.0	0.0
Q13541	1978	uniprot	H. sapiens	1978	H. sapiens	0.0	1.0	0.0	0.0	0.0	0.0	0.0	0.0	0.0	0.0	0.0	0.0	0.0	0.0	0.0	0.0	0.0	0.0	0.0	0.0
Q5T0W9	222584	uniprot	H. sapiens	222584	H. sapiens	0.0	0.0	0.0	0.0	0.0	0.0	0.0	0.0	1.0	0.0	0.0	0.0	0.0	1.0	0.0	0.0	0.0	0.0	0.0	0.0
O75347	6902	uniprot	H. sapiens	6902	H. sapiens	0.0	0.0	0.0	0.0	0.0	0.0	0.0	0.0	0.0	0.0	0.0	0.0	0.0	0.0	0.0	0.0	0.0	0.0	0.0	0.0
Q9NWT1	55003	uniprot	H. sapiens	55003	H. sapiens	0.0	0.0	0.0	0.0	0.0	0.0	0.0	0.0	0.0	0.0	0.0	0.0	0.0	0.0	0.0	0.0	0.0	0.0	0.0	0.0
Q2NKX8	54821	uniprot	H. sapiens	54821	H. sapiens	0.0	0.0	0.0	1.0	0.0	0.0	0.0	0.0	1.0	0.0	0.0	0.0	0.0	0.0	0.0	0.0	0.0	0.0	0.0	0.0
Q9HCE5	57721	uniprot	H. sapiens	57721	H. sapiens	1.0	0.0	0.0	0.0	0.0	0.0	0.0	0.0	0.0	0.0	0.0	0.0	0.0	0.0	0.0	0.0	0.0	0.0	0.0	0.0
O95182	4701	uniprot	H. sapiens	4701	H. sapiens	0.0	0.0	0.0	0.0	0.0	0.0	0.0	0.0	0.0	0.0	0.0	0.0	0.0	0.0	1.0	0.0	0.0	0.0	0.0	0.0
Q14738	5528	uniprot	H. sapiens	5528	H. sapiens	0.0	0.0	0.0	1.0	0.0	1.0	0.0	0.0	1.0	0.0	1.0	0.0	0.0	1.0	0.0	0.0	0.0	0.0	0.0	0.0
Q14746	22796	uniprot	H. sapiens	22796	H. sapiens	0.0	0.0	0.0	0.0	1.0	0.0	0.0	0.0	0.0	0.0	0.0	0.0	0.0	0.0	0.0	0.0	0.0	0.0	0.0	0.0
P04183	7083	uniprot	H. sapiens	7083	H. sapiens	0.0	0.0	0.0	1.0	0.0	1.0	0.0	0.0	0.0	0.0	0.0	0.0	0.0	0.0	0.0	1.0	0.0	0.0	0.0	0.0
Q9BWD1	39	uniprot	H. sapiens	39	H. sapiens	0.0	0.0	0.0	0.0	0.0	0.0	0.0	0.0	0.0	0.0	0.0	0.0	0.0	0.0	0.0	0.0	0.0	0.0	0.0	0.0
Q96ME1	80028	uniprot	H. sapiens	80028	H. sapiens	0.0	0.0	0.0	1.0	0.0	1.0	0.0	0.0	0.0	0.0	0.0	0.0	0.0	0.0	0.0	0.0	0.0	0.0	0.0	0.0
Q9Y2B0	10330	uniprot	H. sapiens	10330	H. sapiens	0.0	0.0	0.0	0.0	0.0	0.0	0.0	0.0	0.0	0.0	0.0	0.0	0.0	0.0	0.0	0.0	0.0	0.0	0.0	0.0
Q92520	10447	uniprot	H. sapiens	10447	H. sapiens	0.0	0.0	0.0	0.0	0.0	0.0	0.0	0.0	0.0	0.0	0.0	0.0	0.0	0.0	0.0	0.0	0.0	0.0	0.0	0.0
Q9BWM7	81855	uniprot	H. sapiens	81855	H. sapiens	0.0	0.0	0.0	0.0	0.0	0.0	0.0	0.0	0.0	0.0	0.0	0.0	0.0	0.0	0.0	0.0	0.0	0.0	0.0	0.0
Q9UBL3	9070	uniprot	H. sapiens	9070	H. sapiens	0.0	0.0	0.0	0.0	0.0	0.0	0.0	0.0	0.0	0.0	0.0	0.0	0.0	0.0	0.0	0.0	0.0	0.0	0.0	0.0
P28066	5686	uniprot	H. sapiens	5686	H. sapiens	1.0	1.0	1.0	1.0	0.0	1.0	1.0	0.0	0.0	0.0	0.0	0.0	0.0	1.0	0.0	0.0	0.0	0.0	0.0	0.0
O43615	10469	uniprot	H. sapiens	10469	H. sapiens	0.0	0.0	0.0	0.0	0.0	0.0	0.0	0.0	0.0	0.0	0.0	0.0	0.0	0.0	0.0	0.0	0.0	0.0	0.0	0.0
O95232	51747	uniprot	H. sapiens	51747	H. sapiens	0.0	0.0	0.0	0.0	0.0	0.0	0.0	0.0	0.0	0.0	0.0	0.0	0.0	0.0	0.0	0.0	0.0	0.0	0.0	0.0
P55072	7415	uniprot	H. sapiens	7415	H. sapiens	0.0	1.0	0.0	0.0	1.0	1.0	1.0	1.0	1.0	0.0	1.0	0.0	0.0	1.0	0.0	0.0	0.0	1.0	0.0	0.0
P60842	1973	uniprot	H. sapiens	1973	H. sapiens	1.0	1.0	0.0	0.0	0.0	1.0	0.0	0.0	0.0	0.0	1.0	0.0	0.0	0.0	0.0	0.0	0.0	0.0	0.0	0.0
Q9H082	83452	uniprot	H. sapiens	83452	H. sapiens	0.0	0.0	0.0	0.0	1.0	0.0	0.0	0.0	0.0	0.0	0.0	0.0	0.0	0.0	0.0	0.0	0.0	0.0	0.0	0.0
P78346	10556	uniprot	H. sapiens	10556	H. sapiens	1.0	1.0	0.0	0.0	0.0	0.0	0.0	0.0	0.0	0.0	1.0	0.0	0.0	0.0	0.0	0.0	0.0	0.0	0.0	0.0
Q99661	11004	uniprot	H. sapiens	11004	H. sapiens	0.0	0.0	0.0	1.0	1.0	1.0	0.0	0.0	1.0	0.0	0.0	0.0	0.0	0.0	0.0	0.0	0.0	0.0	0.0	0.0
Q9BRP8	84305	uniprot	H. sapiens	84305	H. sapiens	0.0	0.0	0.0	0.0	0.0	0.0	0.0	0.0	0.0	0.0	0.0	0.0	0.0	0.0	0.0	0.0	0.0	0.0	0.0	0.0
Q15121	8682	uniprot	H. sapiens	8682	H. sapiens	0.0	0.0	0.0	0.0	0.0	1.0	0.0	0.0	0.0	0.0	0.0	0.0	0.0	0.0	0.0	0.0	0.0	0.0	0.0	0.0
P11182	1629	uniprot	H. sapiens	1629	H. sapiens	0.0	1.0	0.0	0.0	0.0	0.0	0.0	0.0	1.0	0.0	0.0	1.0	0.0	0.0	0.0	0.0	0.0	0.0	0.0	0.0
Q9NPJ3	55856	uniprot	H. sapiens	55856	H. sapiens	0.0	0.0	0.0	0.0	0.0	0.0	0.0	0.0	0.0	0.0	0.0	0.0	0.0	0.0	0.0	0.0	0.0	0.0	0.0	0.0
Q96B23	147339	uniprot	H. sapiens	147339	H. sapiens	0.0	0.0	0.0	0.0	0.0	0.0	0.0	0.0	0.0	0.0	0.0	0.0	0.0	0.0	0.0	0.0	0.0	0.0	0.0	0.0
P19367	3098	uniprot	H. sapiens	3098	H. sapiens	0.0	0.0	0.0	0.0	1.0	1.0	0.0	0.0	0.0	0.0	1.0	0.0	0.0	0.0	0.0	0.0	0.0	0.0	0.0	0.0
Q96B26	11340	uniprot	H. sapiens	11340	H. sapiens	1.0	1.0	0.0	0.0	0.0	1.0	0.0	0.0	0.0	0.0	0.0	0.0	0.0	0.0	0.0	0.0	1.0	0.0	0.0	0.0
P41226	7318	uniprot	H. sapiens	7318	H. sapiens	0.0	0.0	0.0	0.0	0.0	1.0	0.0	1.0	0.0	0.0	1.0	0.0	0.0	0.0	0.0	0.0	0.0	0.0	0.0	0.0
Q8NCG7	221955	uniprot	H. sapiens	221955	H. sapiens	0.0	0.0	0.0	0.0	0.0	0.0	0.0	0.0	0.0	0.0	0.0	0.0	0.0	0.0	0.0	0.0	0.0	0.0	0.0	0.0
Q7Z4W1	51181	uniprot	H. sapiens	51181	H. sapiens	0.0	0.0	0.0	0.0	0.0	0.0	0.0	0.0	0.0	0.0	1.0	0.0	0.0	0.0	0.0	0.0	0.0	0.0	0.0	0.0
Q9UKK9	11164	uniprot	H. sapiens	11164	H. sapiens	0.0	0.0	0.0	0.0	0.0	0.0	0.0	0.0	0.0	0.0	0.0	0.0	0.0	0.0	0.0	1.0	0.0	0.0	0.0	0.0
Q8IX12	55749	uniprot	H. sapiens	55749	H. sapiens	1.0	0.0	0.0	0.0	0.0	0.0	0.0	0.0	0.0	0.0	0.0	0.0	0.0	0.0	0.0	0.0	0.0	0.0	0.0	0.0
Q9BXB5	114884	uniprot	H. sapiens	114884	H. sapiens	0.0	0.0	0.0	0.0	0.0	0.0	0.0	0.0	0.0	0.0	0.0	0.0	0.0	0.0	0.0	0.0	0.0	0.0	0.0	0.0
P51571	6748	uniprot	H. sapiens	6748	H. sapiens	0.0	1.0	0.0	0.0	0.0	0.0	0.0	0.0	0.0	0.0	0.0	0.0	0.0	0.0	0.0	0.0	0.0	0.0	0.0	0.0
Q96EP5	26528	uniprot	H. sapiens	26528	H. sapiens	0.0	0.0	0.0	0.0	0.0	0.0	0.0	0.0	0.0	0.0	0.0	0.0	0.0	0.0	0.0	0.0	0.0	0.0	0.0	0.0
Q9NNW5	11180	uniprot	H. sapiens	11180	H. sapiens	0.0	0.0	0.0	0.0	0.0	0.0	0.0	0.0	1.0	0.0	0.0	0.0	0.0	0.0	0.0	0.0	0.0	0.0	0.0	0.0
P30101	2923	uniprot	H. sapiens	2923	H. sapiens	0.0	0.0	0.0	0.0	1.0	1.0	0.0	0.0	0.0	0.0	0.0	0.0	0.0	0.0	0.0	0.0	0.0	1.0	0.0	0.0
Q13442	11333	uniprot	H. sapiens	11333	H. sapiens	0.0	0.0	0.0	0.0	0.0	0.0	1.0	0.0	0.0	0.0	0.0	0.0	0.0	0.0	0.0	0.0	0.0	0.0	0.0	0.0
Q13547	3065	uniprot	H. sapiens	3065	H. sapiens	0.0	1.0	1.0	1.0	0.0	1.0	0.0	1.0	0.0	0.0	1.0	0.0	0.0	1.0	0.0	0.0	0.0	0.0	0.0	0.0
Q96PK6	10432	uniprot	H. sapiens	10432	H. sapiens	0.0	0.0	0.0	0.0	0.0	1.0	0.0	0.0	0.0	0.0	0.0	0.0	0.0	0.0	0.0	0.0	0.0	0.0	0.0	0.0
Q96T37	64783	uniprot	H. sapiens	64783	H. sapiens	0.0	0.0	0.0	0.0	0.0	0.0	0.0	0.0	0.0	0.0	0.0	0.0	0.0	0.0	0.0	0.0	0.0	0.0	0.0	0.0
Q9UQ13	8036	uniprot	H. sapiens	8036	H. sapiens	0.0	0.0	0.0	0.0	0.0	1.0	0.0	0.0	0.0	0.0	0.0	0.0	0.0	1.0	0.0	0.0	0.0	0.0	0.0	0.0
P83731	6152	uniprot	H. sapiens	6152	H. sapiens	1.0	1.0	0.0	0.0	0.0	0.0	0.0	0.0	0.0	0.0	0.0	0.0	0.0	0.0	0.0	0.0	0.0	0.0	0.0	0.0
Q9BTV4	79188	uniprot	H. sapiens	79188	H. sapiens	0.0	0.0	0.0	0.0	0.0	0.0	0.0	0.0	0.0	0.0	0.0	0.0	0.0	0.0	0.0	0.0	0.0	0.0	0.0	0.0
P50281	4323	uniprot	H. sapiens	4323	H. sapiens	0.0	1.0	0.0	0.0	0.0	0.0	0.0	0.0	0.0	0.0	0.0	0.0	0.0	0.0	0.0	0.0	0.0	0.0	0.0	0.0
P17275	3726	uniprot	H. sapiens	3726	H. sapiens	0.0	0.0	0.0	0.0	0.0	1.0	0.0	0.0	0.0	0.0	0.0	0.0	0.0	1.0	0.0	0.0	0.0	0.0	0.0	0.0
Q92747	10552	uniprot	H. sapiens	10552	H. sapiens	0.0	1.0	0.0	1.0	1.0	0.0	0.0	0.0	1.0	0.0	0.0	0.0	0.0	0.0	0.0	0.0	0.0	0.0	0.0	0.0
Q9Y248	51659	uniprot	H. sapiens	51659	H. sapiens	0.0	0.0	0.0	1.0	0.0	1.0	0.0	1.0	0.0	0.0	0.0	0.0	0.0	0.0	0.0	0.0	0.0	0.0	0.0	0.0
Q8N9N8	84285	uniprot	H. sapiens	84285	H. sapiens	0.0	0.0	0.0	0.0	0.0	0.0	0.0	0.0	0.0	0.0	0.0	0.0	0.0	0.0	0.0	0.0	0.0	0.0	0.0	0.0
Q9BV38	57418	uniprot	H. sapiens	57418	H. sapiens	1.0	1.0	0.0	0.0	0.0	0.0	0.0	0.0	0.0	0.0	0.0	0.0	0.0	0.0	0.0	0.0	0.0	0.0	0.0	0.0
Q9UHV9	5202	uniprot	H. sapiens	5202	H. sapiens	0.0	0.0	0.0	0.0	0.0	0.0	0.0	0.0	0.0	0.0	0.0	0.0	0.0	0.0	0.0	0.0	0.0	0.0	0.0	0.0
Q00403	2959	uniprot	H. sapiens	2959	H. sapiens	0.0	1.0	1.0	0.0	0.0	0.0	0.0	0.0	0.0	0.0	0.0	0.0	0.0	0.0	0.0	0.0	0.0	0.0	0.0	0.0
Q9H5Q4	64216	uniprot	H. sapiens	64216	H. sapiens	0.0	0.0	0.0	0.0	0.0	0.0	0.0	0.0	0.0	0.0	0.0	0.0	0.0	0.0	0.0	0.0	0.0	0.0	0.0	0.0
P31942	3189	uniprot	H. sapiens	3189	H. sapiens	0.0	0.0	0.0	0.0	0.0	0.0	0.0	0.0	0.0	0.0	0.0	0.0	0.0	0.0	0.0	0.0	0.0	0.0	0.0	0.0
O43617	27095	uniprot	H. sapiens	27095	H. sapiens	0.0	0.0	0.0	0.0	1.0	0.0	0.0	0.0	0.0	0.0	0.0	0.0	0.0	0.0	0.0	0.0	0.0	0.0	0.0	0.0
Q86XZ4	65244	uniprot	H. sapiens	65244	H. sapiens	0.0	0.0	0.0	0.0	0.0	0.0	0.0	0.0	0.0	0.0	0.0	0.0	0.0	0.0	0.0	0.0	0.0	0.0	0.0	0.0
Q9ULW3	29777	uniprot	H. sapiens	29777	H. sapiens	0.0	0.0	0.0	0.0	0.0	0.0	0.0	0.0	0.0	0.0	0.0	0.0	0.0	0.0	0.0	0.0	0.0	0.0	0.0	0.0
Q13155	7965	uniprot	H. sapiens	7965	H. sapiens	0.0	1.0	0.0	0.0	0.0	0.0	0.0	0.0	0.0	0.0	0.0	0.0	0.0	0.0	0.0	0.0	0.0	0.0	0.0	0.0
Q96RE7	112939	uniprot	H. sapiens	112939	H. sapiens	0.0	0.0	0.0	0.0	0.0	0.0	0.0	0.0	0.0	0.0	0.0	0.0	0.0	0.0	0.0	0.0	0.0	0.0	0.0	0.0
P35249	5984	uniprot	H. sapiens	5984	H. sapiens	0.0	0.0	0.0	1.0	0.0	1.0	0.0	1.0	0.0	0.0	0.0	0.0	0.0	0.0	0.0	0.0	0.0	0.0	0.0	0.0
O94919	23052	uniprot	H. sapiens	23052	H. sapiens	0.0	0.0	0.0	0.0	0.0	0.0	0.0	0.0	0.0	0.0	0.0	0.0	0.0	0.0	0.0	0.0	0.0	0.0	0.0	0.0
O75940	10285	uniprot	H. sapiens	10285	H. sapiens	1.0	0.0	0.0	0.0	0.0	0.0	0.0	0.0	0.0	0.0	0.0	0.0	0.0	0.0	0.0	0.0	0.0	0.0	0.0	0.0
Q9BWJ5	83443	uniprot	H. sapiens	83443	H. sapiens	1.0	0.0	1.0	0.0	0.0	0.0	0.0	0.0	0.0	0.0	0.0	0.0	0.0	0.0	0.0	0.0	0.0	0.0	0.0	0.0
O00541	23481	uniprot	H. sapiens	23481	H. sapiens	1.0	1.0	0.0	0.0	0.0	0.0	0.0	0.0	0.0	0.0	0.0	0.0	0.0	0.0	0.0	0.0	0.0	0.0	0.0	0.0
Q92945	8570	uniprot	H. sapiens	8570	H. sapiens	1.0	1.0	0.0	0.0	0.0	1.0	0.0	0.0	0.0	0.0	0.0	0.0	0.0	0.0	0.0	0.0	1.0	0.0	0.0	0.0
O76031	10845	uniprot	H. sapiens	10845	H. sapiens	0.0	0.0	0.0	0.0	0.0	0.0	0.0	0.0	0.0	0.0	0.0	1.0	0.0	0.0	0.0	0.0	0.0	0.0	0.0	0.0
P14314	5589	uniprot	H. sapiens	5589	H. sapiens	0.0	1.0	0.0	0.0	1.0	0.0	0.0	0.0	0.0	0.0	0.0	0.0	0.0	0.0	0.0	0.0	0.0	1.0	0.0	0.0
Q99622	113246	uniprot	H. sapiens	113246	H. sapiens	0.0	0.0	0.0	0.0	0.0	0.0	0.0	0.0	0.0	0.0	0.0	0.0	0.0	0.0	0.0	0.0	0.0	0.0	0.0	0.0
Q16740	8192	uniprot	H. sapiens	8192	H. sapiens	0.0	0.0	0.0	0.0	0.0	0.0	0.0	0.0	0.0	0.0	0.0	1.0	0.0	0.0	0.0	0.0	0.0	0.0	0.0	0.0
Q92979	10436	uniprot	H. sapiens	10436	H. sapiens	1.0	1.0	0.0	0.0	0.0	0.0	0.0	0.0	0.0	0.0	0.0	0.0	0.0	0.0	0.0	0.0	0.0	0.0	1.0	0.0
Q96FQ6	140576	uniprot	H. sapiens	140576	H. sapiens	0.0	0.0	0.0	0.0	0.0	0.0	0.0	0.0	0.0	0.0	0.0	0.0	0.0	0.0	0.0	0.0	0.0	0.0	0.0	0.0
P52597	3185	uniprot	H. sapiens	3185	H. sapiens	1.0	0.0	1.0	0.0	0.0	1.0	0.0	0.0	0.0	0.0	0.0	0.0	0.0	1.0	0.0	0.0	0.0	0.0	0.0	1.0
Q9NV06	25879	uniprot	H. sapiens	25879	H. sapiens	1.0	1.0	0.0	0.0	0.0	1.0	0.0	0.0	0.0	0.0	0.0	0.0	0.0	0.0	0.0	0.0	0.0	0.0	1.0	0.0
P07954	2271	uniprot	H. sapiens	2271	H. sapiens	0.0	0.0	0.0	0.0	0.0	0.0	0.0	0.0	0.0	0.0	0.0	1.0	0.0	0.0	1.0	0.0	0.0	0.0	0.0	0.0
O60684	23633	uniprot	H. sapiens	23633	H. sapiens	0.0	0.0	0.0	0.0	0.0	1.0	0.0	0.0	0.0	0.0	0.0	0.0	0.0	0.0	0.0	0.0	0.0	0.0	0.0	0.0
Q9NQ55	56342	uniprot	H. sapiens	56342	H. sapiens	0.0	0.0	0.0	0.0	0.0	0.0	0.0	0.0	0.0	0.0	0.0	0.0	0.0	0.0	0.0	0.0	0.0	0.0	0.0	0.0
P22695	7385	uniprot	H. sapiens	7385	H. sapiens	0.0	0.0	0.0	0.0	0.0	0.0	0.0	0.0	0.0	0.0	0.0	1.0	0.0	0.0	1.0	0.0	0.0	0.0	0.0	0.0
O95336	25796	uniprot	H. sapiens	25796	H. sapiens	0.0	0.0	0.0	0.0	0.0	0.0	0.0	0.0	0.0	0.0	1.0	0.0	0.0	0.0	0.0	0.0	0.0	0.0	0.0	0.0
Q15365	5093	uniprot	H. sapiens	5093	H. sapiens	1.0	0.0	0.0	0.0	0.0	0.0	0.0	0.0	0.0	0.0	0.0	0.0	0.0	0.0	0.0	0.0	0.0	0.0	0.0	0.0
O60353	8323	uniprot	H. sapiens	8323	H. sapiens	0.0	0.0	0.0	0.0	0.0	1.0	0.0	0.0	0.0	0.0	0.0	0.0	0.0	1.0	0.0	0.0	0.0	0.0	0.0	0.0
P49585	5130	uniprot	H. sapiens	5130	H. sapiens	0.0	0.0	0.0	0.0	0.0	0.0	0.0	0.0	0.0	0.0	0.0	0.0	0.0	0.0	0.0	0.0	0.0	0.0	0.0	0.0
Q70UQ0	121457	uniprot	H. sapiens	121457	H. sapiens	0.0	0.0	0.0	0.0	0.0	1.0	0.0	0.0	0.0	0.0	0.0	0.0	0.0	0.0	0.0	0.0	0.0	0.0	0.0	0.0
Q9BS26	23071	uniprot	H. sapiens	23071	H. sapiens	0.0	0.0	0.0	0.0	0.0	0.0	1.0	0.0	0.0	0.0	0.0	0.0	0.0	0.0	0.0	0.0	0.0	0.0	0.0	0.0
P29034	6273	uniprot	H. sapiens	6273	H. sapiens	0.0	0.0	0.0	0.0	0.0	0.0	0.0	0.0	0.0	0.0	0.0	0.0	0.0	0.0	0.0	0.0	0.0	0.0	0.0	0.0
P30040	10961	uniprot	H. sapiens	10961	H. sapiens	0.0	0.0	0.0	0.0	0.0	0.0	0.0	0.0	0.0	0.0	0.0	0.0	0.0	0.0	0.0	0.0	0.0	0.0	0.0	0.0
P02765	197	uniprot	H. sapiens	197	H. sapiens	0.0	0.0	0.0	0.0	0.0	0.0	1.0	0.0	0.0	0.0	0.0	0.0	0.0	0.0	0.0	0.0	0.0	0.0	0.0	0.0
Q9Y6E2	28969	uniprot	H. sapiens	28969	H. sapiens	0.0	0.0	0.0	0.0	0.0	0.0	0.0	0.0	0.0	0.0	0.0	0.0	0.0	0.0	0.0	0.0	0.0	0.0	0.0	0.0
P53007	6576	uniprot	H. sapiens	6576	H. sapiens	0.0	0.0	0.0	0.0	0.0	0.0	0.0	0.0	0.0	0.0	0.0	0.0	0.0	0.0	0.0	0.0	0.0	0.0	0.0	0.0
Q9HDC9	57136	uniprot	H. sapiens	57136	H. sapiens	0.0	0.0	0.0	0.0	0.0	0.0	0.0	0.0	0.0	0.0	0.0	0.0	0.0	0.0	0.0	0.0	0.0	0.0	0.0	0.0
Q8IUH3	129831	uniprot	H. sapiens	129831	H. sapiens	0.0	0.0	0.0	0.0	0.0	0.0	0.0	0.0	0.0	0.0	0.0	0.0	0.0	0.0	0.0	0.0	0.0	0.0	0.0	0.0
Q8TAE8	90480	uniprot	H. sapiens	90480	H. sapiens	0.0	1.0	0.0	0.0	0.0	0.0	0.0	0.0	0.0	0.0	0.0	0.0	1.0	0.0	0.0	0.0	0.0	0.0	0.0	0.0
Q9Y282	51614	uniprot	H. sapiens	51614	H. sapiens	0.0	0.0	0.0	0.0	0.0	0.0	0.0	0.0	0.0	0.0	0.0	0.0	0.0	0.0	0.0	0.0	0.0	0.0	0.0	0.0
P27797	811	uniprot	H. sapiens	811	H. sapiens	0.0	1.0	0.0	0.0	1.0	1.0	0.0	0.0	0.0	0.0	0.0	0.0	0.0	0.0	0.0	0.0	1.0	1.0	0.0	0.0
P61966	1174	uniprot	H. sapiens	1174	H. sapiens	0.0	0.0	0.0	0.0	0.0	0.0	0.0	0.0	0.0	0.0	0.0	0.0	0.0	0.0	0.0	0.0	0.0	0.0	0.0	0.0
Q92922	6599	uniprot	H. sapiens	6599	H. sapiens	0.0	0.0	0.0	0.0	0.0	1.0	0.0	0.0	0.0	0.0	0.0	0.0	0.0	0.0	0.0	0.0	0.0	0.0	0.0	0.0
Q9GZM7	64129	uniprot	H. sapiens	64129	H. sapiens	0.0	0.0	0.0	0.0	0.0	0.0	0.0	0.0	0.0	0.0	0.0	0.0	0.0	0.0	0.0	0.0	0.0	0.0	0.0	0.0
Q9Y3C8	51506	uniprot	H. sapiens	51506	H. sapiens	0.0	0.0	0.0	0.0	0.0	0.0	0.0	0.0	0.0	0.0	0.0	0.0	0.0	0.0	0.0	0.0	0.0	0.0	0.0	0.0
Q96DI7	9410	uniprot	H. sapiens	9410	H. sapiens	1.0	0.0	1.0	0.0	0.0	0.0	0.0	0.0	0.0	0.0	0.0	0.0	0.0	0.0	0.0	0.0	0.0	0.0	0.0	0.0
Q9NWU2	54994	uniprot	H. sapiens	54994	H. sapiens	0.0	0.0	0.0	0.0	0.0	0.0	0.0	0.0	0.0	0.0	0.0	0.0	0.0	0.0	1.0	0.0	0.0	0.0	0.0	0.0
P62318	6634	uniprot	H. sapiens	6634	H. sapiens	1.0	1.0	1.0	0.0	0.0	0.0	0.0	0.0	0.0	1.0	1.0	0.0	0.0	0.0	0.0	0.0	0.0	0.0	0.0	0.0
P62875	5441	uniprot	H. sapiens	5441	H. sapiens	1.0	1.0	1.0	1.0	0.0	0.0	0.0	1.0	0.0	0.0	1.0	0.0	0.0	1.0	0.0	0.0	0.0	0.0	0.0	0.0
P61812	7042	uniprot	H. sapiens	7042	H. sapiens	0.0	0.0	0.0	0.0	0.0	0.0	0.0	0.0	0.0	0.0	0.0	0.0	0.0	0.0	0.0	0.0	0.0	0.0	0.0	0.0
P49756	58517	uniprot	H. sapiens	58517	H. sapiens	1.0	0.0	0.0	0.0	0.0	0.0	0.0	0.0	0.0	0.0	0.0	0.0	0.0	0.0	0.0	0.0	0.0	0.0	0.0	0.0
Q96CN7	51015	uniprot	H. sapiens	51015	H. sapiens	0.0	0.0	0.0	0.0	0.0	0.0	0.0	0.0	0.0	0.0	0.0	0.0	0.0	0.0	0.0	0.0	0.0	0.0	0.0	0.0
P52594	3267	uniprot	H. sapiens	3267	H. sapiens	0.0	0.0	0.0	0.0	1.0	0.0	0.0	0.0	0.0	0.0	0.0	0.0	0.0	0.0	0.0	0.0	0.0	0.0	0.0	0.0
Q16537	5529	uniprot	H. sapiens	5529	H. sapiens	0.0	0.0	0.0	1.0	0.0	1.0	0.0	0.0	1.0	0.0	0.0	0.0	0.0	1.0	0.0	0.0	0.0	0.0	0.0	0.0
Q14289	2185	uniprot	H. sapiens	2185	H. sapiens	0.0	0.0	0.0	0.0	0.0	1.0	0.0	0.0	1.0	0.0	0.0	0.0	0.0	1.0	0.0	0.0	0.0	0.0	0.0	0.0
P84095	391	uniprot	H. sapiens	391	H. sapiens	0.0	0.0	0.0	1.0	0.0	1.0	1.0	0.0	1.0	0.0	0.0	0.0	0.0	1.0	0.0	0.0	0.0	0.0	0.0	0.0
Q9BVI4	79050	uniprot	H. sapiens	79050	H. sapiens	1.0	1.0	0.0	0.0	0.0	0.0	0.0	0.0	0.0	0.0	0.0	0.0	0.0	0.0	0.0	0.0	0.0	0.0	1.0	0.0
Q92541	23168	uniprot	H. sapiens	23168	H. sapiens	0.0	0.0	1.0	0.0	0.0	0.0	0.0	0.0	0.0	0.0	0.0	0.0	0.0	0.0	0.0	0.0	0.0	0.0	0.0	0.0
P13984	2963	uniprot	H. sapiens	2963	H. sapiens	1.0	1.0	1.0	0.0	0.0	0.0	0.0	1.0	0.0	0.0	1.0	0.0	0.0	1.0	0.0	0.0	0.0	0.0	0.0	0.0
Q96T88	29128	uniprot	H. sapiens	29128	H. sapiens	0.0	0.0	0.0	0.0	0.0	0.0	0.0	0.0	0.0	0.0	0.0	0.0	0.0	0.0	0.0	0.0	0.0	0.0	0.0	0.0
O75884	10741	uniprot	H. sapiens	10741	H. sapiens	0.0	0.0	0.0	0.0	0.0	0.0	0.0	0.0	0.0	0.0	0.0	0.0	0.0	0.0	0.0	0.0	0.0	0.0	0.0	0.0
Q9HCY8	57402	uniprot	H. sapiens	57402	H. sapiens	0.0	0.0	0.0	0.0	0.0	0.0	0.0	0.0	0.0	0.0	0.0	0.0	0.0	0.0	0.0	0.0	0.0	0.0	0.0	0.0
Q92598	10808	uniprot	H. sapiens	10808	H. sapiens	0.0	1.0	0.0	0.0	1.0	0.0	0.0	0.0	0.0	0.0	1.0	0.0	0.0	0.0	0.0	0.0	0.0	0.0	0.0	0.0
Q15773	8079	uniprot	H. sapiens	8079	H. sapiens	0.0	0.0	0.0	0.0	0.0	0.0	0.0	0.0	0.0	0.0	0.0	0.0	0.0	0.0	0.0	0.0	0.0	0.0	0.0	0.0
Q15424	6294	uniprot	H. sapiens	6294	H. sapiens	0.0	0.0	0.0	0.0	0.0	0.0	0.0	0.0	0.0	0.0	1.0	0.0	0.0	0.0	0.0	0.0	0.0	0.0	0.0	0.0
Q13242	8683	uniprot	H. sapiens	8683	H. sapiens	1.0	0.0	0.0	0.0	0.0	0.0	0.0	0.0	0.0	1.0	0.0	0.0	0.0	0.0	0.0	0.0	0.0	0.0	0.0	0.0
Q5T200	23091	uniprot	H. sapiens	23091	H. sapiens	0.0	0.0	0.0	0.0	0.0	0.0	0.0	0.0	0.0	0.0	0.0	0.0	0.0	0.0	0.0	0.0	0.0	0.0	0.0	0.0
Q9NV88	55756	uniprot	H. sapiens	55756	H. sapiens	0.0	0.0	1.0	0.0	0.0	0.0	0.0	0.0	0.0	0.0	0.0	0.0	0.0	0.0	0.0	0.0	0.0	0.0	0.0	0.0
Q6KB66	144501	uniprot	H. sapiens	144501	H. sapiens	0.0	0.0	0.0	0.0	0.0	0.0	0.0	0.0	0.0	0.0	0.0	0.0	0.0	0.0	0.0	0.0	0.0	0.0	0.0	0.0
P07737	5216	uniprot	H. sapiens	5216	H. sapiens	0.0	1.0	0.0	1.0	0.0	1.0	0.0	0.0	1.0	0.0	0.0	0.0	0.0	0.0	0.0	0.0	0.0	0.0	0.0	0.0
Q9Y5B8	29922	uniprot	H. sapiens	29922	H. sapiens	0.0	0.0	0.0	1.0	0.0	1.0	0.0	0.0	0.0	0.0	0.0	0.0	0.0	0.0	0.0	0.0	0.0	0.0	0.0	0.0
Q9HCS7	56949	uniprot	H. sapiens	56949	H. sapiens	1.0	0.0	0.0	0.0	0.0	0.0	0.0	1.0	0.0	0.0	0.0	0.0	0.0	0.0	0.0	0.0	0.0	0.0	0.0	0.0
Q02790	2288	uniprot	H. sapiens	2288	H. sapiens	0.0	1.0	1.0	0.0	0.0	0.0	0.0	0.0	0.0	0.0	1.0	0.0	0.0	0.0	0.0	0.0	0.0	0.0	0.0	0.0
Q14315	2318	uniprot	H. sapiens	2318	H. sapiens	0.0	0.0	0.0	0.0	0.0	0.0	0.0	0.0	0.0	0.0	0.0	0.0	0.0	0.0	0.0	0.0	0.0	0.0	0.0	0.0
Q96DZ1	27248	uniprot	H. sapiens	27248	H. sapiens	0.0	0.0	0.0	0.0	0.0	1.0	0.0	0.0	0.0	0.0	0.0	0.0	0.0	1.0	0.0	0.0	0.0	0.0	0.0	0.0
O14908	10755	uniprot	H. sapiens	10755	H. sapiens	0.0	0.0	0.0	0.0	0.0	0.0	0.0	0.0	0.0	0.0	0.0	0.0	0.0	0.0	0.0	0.0	0.0	0.0	0.0	0.0
Q14192	2274	uniprot	H. sapiens	2274	H. sapiens	0.0	0.0	0.0	0.0	0.0	0.0	0.0	0.0	0.0	0.0	0.0	0.0	0.0	0.0	0.0	0.0	0.0	0.0	0.0	0.0
Q15126	10654	uniprot	H. sapiens	10654	H. sapiens	0.0	0.0	0.0	0.0	0.0	0.0	0.0	0.0	0.0	0.0	0.0	0.0	0.0	0.0	0.0	0.0	0.0	0.0	0.0	0.0
P20700	4001	uniprot	H. sapiens	4001	H. sapiens	0.0	1.0	0.0	1.0	0.0	1.0	0.0	0.0	1.0	0.0	1.0	0.0	0.0	0.0	0.0	0.0	0.0	0.0	0.0	1.0
Q9HCN8	23753	uniprot	H. sapiens	23753	H. sapiens	0.0	0.0	0.0	0.0	0.0	0.0	0.0	0.0	0.0	0.0	0.0	0.0	0.0	0.0	0.0	0.0	0.0	0.0	0.0	0.0
Q92572	1176	uniprot	H. sapiens	1176	H. sapiens	0.0	0.0	0.0	0.0	1.0	0.0	0.0	0.0	0.0	0.0	0.0	0.0	0.0	0.0	0.0	0.0	0.0	0.0	0.0	0.0
Q05048	1477	uniprot	H. sapiens	1477	H. sapiens	1.0	0.0	0.0	0.0	0.0	0.0	0.0	0.0	0.0	1.0	0.0	0.0	0.0	0.0	0.0	0.0	0.0	0.0	0.0	0.0
Q04917	7533	uniprot	H. sapiens	7533	H. sapiens	0.0	1.0	0.0	1.0	1.0	1.0	0.0	1.0	1.0	0.0	0.0	0.0	0.0	0.0	0.0	0.0	0.0	0.0	0.0	0.0
Q8IZ73	27079	uniprot	H. sapiens	27079	H. sapiens	0.0	0.0	0.0	0.0	0.0	0.0	0.0	0.0	0.0	0.0	0.0	0.0	0.0	0.0	0.0	0.0	0.0	0.0	0.0	0.0
P52815	6182	uniprot	H. sapiens	6182	H. sapiens	0.0	1.0	0.0	0.0	0.0	0.0	0.0	0.0	0.0	0.0	0.0	1.0	1.0	0.0	0.0	0.0	0.0	0.0	0.0	0.0
P10155	6738	uniprot	H. sapiens	6738	H. sapiens	0.0	0.0	0.0	0.0	0.0	0.0	0.0	0.0	0.0	0.0	0.0	0.0	0.0	0.0	0.0	0.0	0.0	0.0	0.0	0.0
Q9NPD3	54512	uniprot	H. sapiens	54512	H. sapiens	1.0	1.0	0.0	0.0	0.0	1.0	0.0	0.0	0.0	0.0	0.0	0.0	0.0	0.0	0.0	0.0	1.0	0.0	0.0	0.0
Q8NFF5	80308	uniprot	H. sapiens	80308	H. sapiens	0.0	0.0	0.0	0.0	0.0	0.0	0.0	0.0	0.0	0.0	0.0	0.0	0.0	0.0	0.0	0.0	0.0	0.0	0.0	0.0
P49902	22978	uniprot	H. sapiens	22978	H. sapiens	0.0	0.0	0.0	0.0	0.0	0.0	0.0	0.0	0.0	0.0	0.0	0.0	0.0	0.0	0.0	1.0	0.0	0.0	0.0	0.0
Q86SX6	51218	uniprot	H. sapiens	51218	H. sapiens	0.0	0.0	0.0	0.0	0.0	0.0	0.0	0.0	0.0	0.0	0.0	0.0	0.0	0.0	0.0	0.0	0.0	0.0	0.0	0.0
P04080	1476	uniprot	H. sapiens	1476	H. sapiens	0.0	0.0	0.0	0.0	0.0	0.0	1.0	0.0	0.0	0.0	0.0	0.0	0.0	0.0	0.0	0.0	0.0	0.0	0.0	0.0
O43242	5709	uniprot	H. sapiens	5709	H. sapiens	1.0	1.0	1.0	1.0	0.0	1.0	1.0	0.0	0.0	0.0	0.0	0.0	0.0	1.0	0.0	0.0	0.0	0.0	0.0	0.0
Q13867	642	uniprot	H. sapiens	642	H. sapiens	0.0	0.0	0.0	0.0	0.0	1.0	0.0	0.0	0.0	0.0	0.0	0.0	0.0	0.0	0.0	0.0	0.0	0.0	0.0	0.0
P04062	2629	uniprot	H. sapiens	2629	H. sapiens	0.0	0.0	0.0	0.0	0.0	0.0	0.0	0.0	0.0	0.0	0.0	0.0	0.0	0.0	0.0	0.0	0.0	0.0	0.0	0.0
Q9UBX3	1468	uniprot	H. sapiens	1468	H. sapiens	0.0	1.0	0.0	0.0	0.0	0.0	0.0	0.0	0.0	0.0	0.0	0.0	0.0	0.0	0.0	0.0	0.0	0.0	0.0	0.0
P36952	5268	uniprot	H. sapiens	5268	H. sapiens	0.0	0.0	0.0	0.0	0.0	0.0	0.0	0.0	0.0	0.0	0.0	0.0	0.0	0.0	0.0	0.0	0.0	0.0	0.0	0.0
Q9P258	55920	uniprot	H. sapiens	55920	H. sapiens	0.0	0.0	0.0	1.0	0.0	0.0	0.0	0.0	1.0	0.0	0.0	0.0	0.0	0.0	0.0	0.0	0.0	0.0	0.0	0.0
Q96G03	55276	uniprot	H. sapiens	55276	H. sapiens	0.0	0.0	0.0	0.0	0.0	0.0	1.0	0.0	0.0	0.0	1.0	0.0	0.0	0.0	0.0	0.0	0.0	0.0	0.0	0.0
Q96SZ5	84890	uniprot	H. sapiens	84890	H. sapiens	0.0	1.0	0.0	0.0	0.0	0.0	0.0	0.0	0.0	0.0	0.0	0.0	0.0	0.0	0.0	0.0	0.0	0.0	0.0	0.0
P15104	2752	uniprot	H. sapiens	2752	H. sapiens	0.0	1.0	0.0	0.0	0.0	0.0	0.0	0.0	0.0	0.0	0.0	0.0	0.0	0.0	0.0	0.0	0.0	0.0	0.0	0.0
P62314	6632	uniprot	H. sapiens	6632	H. sapiens	1.0	1.0	1.0	0.0	0.0	0.0	0.0	0.0	0.0	0.0	1.0	0.0	0.0	0.0	0.0	0.0	0.0	0.0	0.0	0.0
Q562R1	345651	uniprot	H. sapiens	345651	H. sapiens	0.0	0.0	0.0	0.0	0.0	0.0	0.0	0.0	0.0	0.0	0.0	0.0	0.0	0.0	0.0	0.0	0.0	0.0	0.0	0.0
Q9NRY2	58493	uniprot	H. sapiens	58493	H. sapiens	0.0	0.0	0.0	0.0	0.0	0.0	0.0	0.0	0.0	0.0	0.0	0.0	0.0	0.0	0.0	0.0	0.0	0.0	0.0	0.0
P47224	5877	uniprot	H. sapiens	5877	H. sapiens	0.0	0.0	0.0	0.0	0.0	0.0	0.0	0.0	0.0	0.0	0.0	0.0	0.0	0.0	0.0	0.0	0.0	0.0	0.0	0.0
Q9H974	79691	uniprot	H. sapiens	79691	H. sapiens	1.0	0.0	0.0	0.0	0.0	0.0	0.0	0.0	0.0	0.0	1.0	0.0	0.0	0.0	0.0	0.0	0.0	0.0	0.0	0.0
Q13426	7518	uniprot	H. sapiens	7518	H. sapiens	0.0	0.0	0.0	0.0	0.0	0.0	0.0	0.0	0.0	0.0	0.0	0.0	0.0	0.0	0.0	0.0	0.0	0.0	0.0	0.0
Q9H583	55127	uniprot	H. sapiens	55127	H. sapiens	1.0	1.0	0.0	0.0	0.0	0.0	0.0	0.0	0.0	0.0	0.0	0.0	0.0	0.0	0.0	0.0	0.0	0.0	1.0	0.0
Q9Y266	10726	uniprot	H. sapiens	10726	H. sapiens	0.0	0.0	0.0	1.0	0.0	0.0	0.0	0.0	1.0	0.0	0.0	0.0	0.0	0.0	0.0	0.0	0.0	0.0	0.0	0.0
Q9BW91	53343	uniprot	H. sapiens	53343	H. sapiens	0.0	0.0	0.0	0.0	0.0	0.0	0.0	0.0	0.0	0.0	0.0	0.0	0.0	0.0	0.0	1.0	0.0	0.0	0.0	0.0
O43264	9183	uniprot	H. sapiens	9183	H. sapiens	0.0	0.0	0.0	1.0	1.0	0.0	0.0	0.0	1.0	0.0	0.0	0.0	0.0	0.0	0.0	0.0	0.0	0.0	0.0	0.0
P51970	4702	uniprot	H. sapiens	4702	H. sapiens	0.0	0.0	0.0	0.0	0.0	0.0	0.0	0.0	0.0	0.0	0.0	0.0	0.0	0.0	1.0	0.0	0.0	0.0	0.0	0.0
P05120	5055	uniprot	H. sapiens	5055	H. sapiens	0.0	0.0	0.0	0.0	0.0	1.0	0.0	0.0	0.0	0.0	0.0	0.0	0.0	0.0	0.0	0.0	0.0	0.0	0.0	1.0
Q9BUE0	54797	uniprot	H. sapiens	54797	H. sapiens	0.0	1.0	0.0	0.0	0.0	0.0	0.0	0.0	0.0	0.0	0.0	0.0	0.0	0.0	0.0	0.0	0.0	0.0	0.0	0.0
O75843	8906	uniprot	H. sapiens	8906	H. sapiens	0.0	0.0	0.0	0.0	1.0	0.0	0.0	0.0	0.0	0.0	0.0	0.0	0.0	0.0	0.0	0.0	0.0	0.0	0.0	0.0
Q12962	6881	uniprot	H. sapiens	6881	H. sapiens	0.0	1.0	1.0	0.0	0.0	1.0	0.0	1.0	0.0	0.0	0.0	0.0	0.0	0.0	0.0	0.0	0.0	0.0	0.0	0.0
P82979	84324	uniprot	H. sapiens	84324	H. sapiens	1.0	0.0	0.0	0.0	0.0	0.0	0.0	0.0	0.0	1.0	0.0	0.0	0.0	0.0	0.0	0.0	0.0	0.0	0.0	0.0
P55209	4673	uniprot	H. sapiens	4673	H. sapiens	0.0	0.0	0.0	0.0	0.0	0.0	0.0	0.0	0.0	0.0	0.0	0.0	0.0	0.0	0.0	0.0	0.0	0.0	0.0	0.0
O75390	1431	uniprot	H. sapiens	1431	H. sapiens	0.0	0.0	0.0	0.0	0.0	0.0	0.0	0.0	0.0	0.0	0.0	1.0	0.0	0.0	1.0	0.0	0.0	0.0	0.0	0.0
Q8WXX5	23234	uniprot	H. sapiens	23234	H. sapiens	0.0	0.0	0.0	0.0	0.0	0.0	0.0	0.0	0.0	0.0	0.0	0.0	0.0	0.0	0.0	0.0	0.0	0.0	0.0	0.0
O75223	79017	uniprot	H. sapiens	79017	H. sapiens	0.0	0.0	0.0	0.0	0.0	0.0	0.0	0.0	0.0	0.0	0.0	0.0	0.0	0.0	0.0	0.0	0.0	0.0	0.0	0.0
Q9H832	65264	uniprot	H. sapiens	65264	H. sapiens	0.0	0.0	0.0	0.0	0.0	1.0	0.0	0.0	0.0	0.0	0.0	0.0	0.0	0.0	0.0	0.0	0.0	0.0	0.0	0.0
Q9H6Y2	54853	uniprot	H. sapiens	54853	H. sapiens	0.0	0.0	0.0	0.0	0.0	0.0	0.0	0.0	0.0	0.0	0.0	0.0	0.0	0.0	0.0	0.0	0.0	0.0	0.0	0.0
Q14677	9685	uniprot	H. sapiens	9685	H. sapiens	0.0	0.0	0.0	0.0	1.0	0.0	0.0	0.0	0.0	0.0	0.0	0.0	0.0	0.0	0.0	0.0	0.0	0.0	0.0	0.0
P61020	5869	uniprot	H. sapiens	5869	H. sapiens	0.0	1.0	0.0	0.0	1.0	0.0	1.0	0.0	0.0	0.0	0.0	0.0	0.0	0.0	0.0	0.0	0.0	0.0	0.0	0.0
Q96MX6	116143	uniprot	H. sapiens	116143	H. sapiens	0.0	0.0	0.0	0.0	0.0	0.0	0.0	0.0	0.0	0.0	0.0	0.0	0.0	0.0	0.0	0.0	0.0	0.0	0.0	0.0
Q92878	10111	uniprot	H. sapiens	10111	H. sapiens	0.0	1.0	0.0	1.0	0.0	0.0	0.0	1.0	0.0	0.0	0.0	0.0	0.0	0.0	0.0	0.0	0.0	0.0	0.0	0.0
Q01167	3607	uniprot	H. sapiens	3607	H. sapiens	0.0	0.0	0.0	0.0	0.0	1.0	0.0	0.0	0.0	0.0	0.0	0.0	0.0	0.0	0.0	0.0	0.0	0.0	0.0	0.0
Q96Q11	51095	uniprot	H. sapiens	51095	H. sapiens	0.0	0.0	0.0	0.0	0.0	0.0	0.0	0.0	0.0	0.0	0.0	0.0	0.0	0.0	0.0	0.0	0.0	0.0	0.0	0.0
O14656	1861	uniprot	H. sapiens	1861	H. sapiens	0.0	0.0	0.0	0.0	0.0	0.0	0.0	0.0	0.0	0.0	0.0	0.0	0.0	0.0	0.0	0.0	0.0	0.0	0.0	0.0
Q15942	7791	uniprot	H. sapiens	7791	H. sapiens	0.0	0.0	0.0	0.0	0.0	0.0	0.0	0.0	0.0	0.0	0.0	0.0	0.0	0.0	0.0	0.0	0.0	0.0	0.0	0.0
P27694	6117	uniprot	H. sapiens	6117	H. sapiens	0.0	1.0	0.0	1.0	0.0	1.0	0.0	1.0	0.0	0.0	1.0	0.0	0.0	0.0	0.0	0.0	0.0	0.0	0.0	0.0
P62829	9349	uniprot	H. sapiens	9349	H. sapiens	1.0	1.0	0.0	0.0	0.0	0.0	0.0	0.0	0.0	0.0	0.0	0.0	0.0	0.0	0.0	0.0	0.0	0.0	0.0	0.0
Q6ISB3	79977	uniprot	H. sapiens	79977	H. sapiens	0.0	0.0	0.0	0.0	0.0	0.0	0.0	0.0	0.0	0.0	0.0	0.0	0.0	0.0	0.0	0.0	0.0	0.0	0.0	0.0
Q9UQ80	5036	uniprot	H. sapiens	5036	H. sapiens	0.0	0.0	0.0	0.0	0.0	0.0	1.0	0.0	0.0	0.0	0.0	0.0	0.0	0.0	0.0	0.0	0.0	0.0	0.0	0.0
Q96JJ3	63916	uniprot	H. sapiens	63916	H. sapiens	0.0	0.0	0.0	0.0	0.0	0.0	0.0	0.0	1.0	0.0	0.0	0.0	0.0	1.0	0.0	0.0	0.0	0.0	0.0	0.0
O00303	8665	uniprot	H. sapiens	8665	H. sapiens	0.0	1.0	0.0	0.0	0.0	0.0	0.0	0.0	0.0	0.0	0.0	0.0	0.0	0.0	0.0	0.0	0.0	0.0	0.0	0.0
P53384	4682	uniprot	H. sapiens	4682	H. sapiens	0.0	0.0	0.0	0.0	0.0	0.0	0.0	0.0	0.0	0.0	0.0	0.0	0.0	0.0	0.0	0.0	0.0	0.0	0.0	0.0
P48637	2937	uniprot	H. sapiens	2937	H. sapiens	0.0	0.0	0.0	0.0	0.0	0.0	0.0	0.0	0.0	0.0	0.0	0.0	0.0	0.0	0.0	0.0	0.0	0.0	0.0	0.0
P50416	1374	uniprot	H. sapiens	1374	H. sapiens	0.0	0.0	0.0	0.0	0.0	0.0	0.0	0.0	0.0	0.0	0.0	0.0	0.0	0.0	0.0	0.0	0.0	0.0	0.0	0.0
Q9H444	128866	uniprot	H. sapiens	128866	H. sapiens	0.0	1.0	1.0	1.0	1.0	1.0	0.0	0.0	0.0	0.0	1.0	0.0	0.0	0.0	0.0	0.0	0.0	0.0	0.0	0.0
P49721	5690	uniprot	H. sapiens	5690	H. sapiens	1.0	1.0	1.0	1.0	0.0	1.0	0.0	0.0	0.0	0.0	0.0	0.0	0.0	1.0	0.0	0.0	0.0	0.0	0.0	0.0
Q96J02	83737	uniprot	H. sapiens	83737	H. sapiens	0.0	0.0	0.0	0.0	0.0	0.0	0.0	0.0	0.0	0.0	0.0	0.0	0.0	0.0	0.0	0.0	0.0	0.0	0.0	0.0
Q16531	1642	uniprot	H. sapiens	1642	H. sapiens	0.0	0.0	0.0	0.0	0.0	1.0	0.0	1.0	0.0	0.0	0.0	0.0	0.0	0.0	0.0	0.0	0.0	0.0	0.0	0.0
Q13610	11137	uniprot	H. sapiens	11137	H. sapiens	0.0	0.0	0.0	0.0	0.0	0.0	0.0	0.0	0.0	0.0	0.0	0.0	0.0	0.0	0.0	0.0	0.0	0.0	0.0	0.0
P12004	5111	uniprot	H. sapiens	5111	H. sapiens	0.0	0.0	0.0	1.0	0.0	1.0	0.0	1.0	0.0	0.0	1.0	0.0	0.0	0.0	0.0	0.0	0.0	0.0	0.0	0.0
Q9Y3B4	51639	uniprot	H. sapiens	51639	H. sapiens	1.0	0.0	1.0	0.0	0.0	0.0	0.0	0.0	0.0	0.0	0.0	0.0	0.0	0.0	0.0	0.0	0.0	0.0	0.0	0.0
P35606	9276	uniprot	H. sapiens	9276	H. sapiens	0.0	0.0	0.0	0.0	1.0	0.0	0.0	0.0	0.0	0.0	0.0	0.0	0.0	0.0	0.0	0.0	0.0	0.0	0.0	0.0
Q8N2W9	51588	uniprot	H. sapiens	51588	H. sapiens	0.0	0.0	0.0	1.0	0.0	0.0	0.0	1.0	0.0	0.0	1.0	0.0	0.0	0.0	0.0	0.0	0.0	0.0	0.0	0.0
P82675	64969	uniprot	H. sapiens	64969	H. sapiens	0.0	1.0	0.0	0.0	0.0	0.0	0.0	0.0	0.0	0.0	0.0	0.0	1.0	0.0	0.0	0.0	0.0	0.0	0.0	0.0
O75934	10286	uniprot	H. sapiens	10286	H. sapiens	1.0	0.0	0.0	0.0	0.0	0.0	0.0	0.0	0.0	0.0	0.0	0.0	0.0	0.0	0.0	0.0	0.0	0.0	0.0	0.0
O14949	27089	uniprot	H. sapiens	27089	H. sapiens	0.0	0.0	0.0	0.0	0.0	0.0	0.0	0.0	0.0	0.0	0.0	1.0	0.0	0.0	1.0	0.0	0.0	0.0	0.0	0.0
P30049	513	uniprot	H. sapiens	513	H. sapiens	0.0	0.0	0.0	0.0	0.0	0.0	0.0	0.0	0.0	0.0	0.0	0.0	0.0	0.0	1.0	0.0	0.0	0.0	0.0	0.0
Q9UHG3	51449	uniprot	H. sapiens	51449	H. sapiens	0.0	0.0	0.0	0.0	0.0	0.0	0.0	0.0	0.0	0.0	0.0	0.0	0.0	0.0	0.0	0.0	0.0	0.0	0.0	0.0
P25787	5683	uniprot	H. sapiens	5683	H. sapiens	1.0	1.0	1.0	1.0	0.0	1.0	1.0	0.0	0.0	0.0	0.0	0.0	0.0	1.0	0.0	0.0	0.0	0.0	0.0	0.0
O43633	27243	uniprot	H. sapiens	27243	H. sapiens	0.0	1.0	1.0	1.0	1.0	1.0	0.0	0.0	0.0	0.0	1.0	0.0	0.0	0.0	0.0	0.0	0.0	0.0	0.0	0.0
Q9Y5J7	26520	uniprot	H. sapiens	26520	H. sapiens	0.0	0.0	0.0	0.0	0.0	0.0	0.0	0.0	0.0	0.0	0.0	1.0	0.0	0.0	0.0	0.0	0.0	0.0	0.0	0.0
P61353	6155	uniprot	H. sapiens	6155	H. sapiens	1.0	1.0	0.0	0.0	0.0	0.0	0.0	0.0	0.0	0.0	0.0	0.0	0.0	0.0	0.0	0.0	0.0	0.0	0.0	0.0
P83916	10951	uniprot	H. sapiens	10951	H. sapiens	0.0	1.0	0.0	0.0	0.0	0.0	0.0	0.0	0.0	0.0	1.0	0.0	0.0	0.0	0.0	0.0	0.0	0.0	0.0	0.0
O96008	10452	uniprot	H. sapiens	10452	H. sapiens	0.0	0.0	0.0	0.0	0.0	0.0	0.0	0.0	0.0	0.0	0.0	0.0	0.0	0.0	0.0	0.0	0.0	0.0	0.0	0.0
P17028	7572	uniprot	H. sapiens	7572	H. sapiens	0.0	0.0	0.0	0.0	0.0	0.0	0.0	0.0	0.0	0.0	0.0	0.0	0.0	0.0	0.0	0.0	0.0	0.0	0.0	0.0
Q9H2W6	26589	uniprot	H. sapiens	26589	H. sapiens	0.0	1.0	0.0	0.0	0.0	0.0	0.0	0.0	0.0	0.0	0.0	0.0	1.0	0.0	0.0	0.0	0.0	0.0	0.0	0.0
Q06265	5393	uniprot	H. sapiens	5393	H. sapiens	1.0	1.0	0.0	0.0	0.0	1.0	0.0	0.0	0.0	0.0	0.0	0.0	0.0	0.0	0.0	0.0	1.0	0.0	0.0	0.0
Q9NP61	26286	uniprot	H. sapiens	26286	H. sapiens	0.0	0.0	0.0	0.0	1.0	0.0	0.0	0.0	1.0	0.0	0.0	0.0	0.0	0.0	0.0	0.0	0.0	0.0	0.0	0.0
Q86U44	56339	uniprot	H. sapiens	56339	H. sapiens	1.0	0.0	0.0	0.0	0.0	0.0	0.0	0.0	0.0	0.0	0.0	0.0	0.0	0.0	0.0	0.0	0.0	0.0	0.0	0.0
Q9H4H8	81610	uniprot	H. sapiens	81610	H. sapiens	0.0	0.0	0.0	0.0	0.0	0.0	0.0	0.0	0.0	0.0	0.0	0.0	0.0	0.0	0.0	0.0	0.0	0.0	0.0	0.0
Q9BU89	83475	uniprot	H. sapiens	83475	H. sapiens	0.0	0.0	0.0	0.0	0.0	0.0	0.0	0.0	0.0	0.0	0.0	0.0	0.0	0.0	0.0	0.0	0.0	0.0	0.0	0.0
Q6PL18	29028	uniprot	H. sapiens	29028	H. sapiens	0.0	0.0	0.0	0.0	0.0	0.0	0.0	0.0	0.0	0.0	0.0	0.0	0.0	0.0	0.0	0.0	0.0	0.0	0.0	0.0
O43159	23378	uniprot	H. sapiens	23378	H. sapiens	0.0	0.0	0.0	0.0	0.0	0.0	0.0	0.0	0.0	0.0	0.0	0.0	0.0	0.0	0.0	0.0	0.0	0.0	0.0	0.0
Q9UKD2	51154	uniprot	H. sapiens	51154	H. sapiens	0.0	0.0	0.0	0.0	0.0	0.0	0.0	0.0	0.0	0.0	0.0	0.0	0.0	0.0	0.0	0.0	0.0	0.0	0.0	0.0
P55795	3188	uniprot	H. sapiens	3188	H. sapiens	1.0	0.0	0.0	0.0	0.0	0.0	0.0	0.0	0.0	0.0	0.0	0.0	0.0	0.0	0.0	0.0	0.0	0.0	0.0	0.0
Q9H5V8	64866	uniprot	H. sapiens	64866	H. sapiens	0.0	0.0	0.0	0.0	0.0	0.0	0.0	0.0	0.0	0.0	0.0	0.0	0.0	0.0	0.0	0.0	0.0	0.0	0.0	0.0
Q86Y82	23673	uniprot	H. sapiens	23673	H. sapiens	0.0	0.0	0.0	0.0	0.0	0.0	0.0	0.0	0.0	0.0	0.0	0.0	0.0	0.0	0.0	0.0	0.0	0.0	0.0	0.0
Q00059	7019	uniprot	H. sapiens	7019	H. sapiens	0.0	0.0	0.0	0.0	0.0	0.0	0.0	0.0	0.0	0.0	0.0	1.0	0.0	0.0	0.0	0.0	0.0	0.0	0.0	0.0
P63220	6227	uniprot	H. sapiens	6227	H. sapiens	1.0	1.0	0.0	0.0	0.0	0.0	0.0	0.0	0.0	0.0	0.0	0.0	0.0	0.0	0.0	0.0	0.0	0.0	0.0	0.0
Q8NFV4	83451	uniprot	H. sapiens	83451	H. sapiens	0.0	0.0	0.0	0.0	0.0	0.0	0.0	0.0	0.0	0.0	0.0	0.0	0.0	0.0	0.0	0.0	0.0	0.0	0.0	0.0
P15586	2799	uniprot	H. sapiens	2799	H. sapiens	0.0	0.0	0.0	0.0	1.0	0.0	1.0	0.0	0.0	0.0	1.0	0.0	0.0	0.0	0.0	0.0	0.0	0.0	0.0	0.0
Q15785	10953	uniprot	H. sapiens	10953	H. sapiens	0.0	0.0	0.0	0.0	0.0	0.0	0.0	0.0	0.0	0.0	0.0	0.0	0.0	0.0	0.0	0.0	0.0	0.0	0.0	0.0
P08754	2773	uniprot	H. sapiens	2773	H. sapiens	0.0	0.0	1.0	0.0	0.0	0.0	0.0	0.0	0.0	0.0	0.0	0.0	0.0	0.0	0.0	0.0	0.0	0.0	0.0	0.0
Q96A33	57003	uniprot	H. sapiens	57003	H. sapiens	0.0	0.0	0.0	0.0	0.0	0.0	0.0	0.0	0.0	0.0	0.0	0.0	0.0	0.0	0.0	0.0	0.0	0.0	0.0	0.0
Q15007	9589	uniprot	H. sapiens	9589	H. sapiens	0.0	0.0	0.0	0.0	0.0	0.0	0.0	0.0	0.0	0.0	0.0	0.0	0.0	0.0	0.0	0.0	0.0	0.0	0.0	0.0
O94760	23576	uniprot	H. sapiens	23576	H. sapiens	0.0	0.0	0.0	0.0	0.0	0.0	0.0	0.0	0.0	0.0	0.0	0.0	0.0	0.0	0.0	0.0	0.0	0.0	0.0	0.0
P49755	10972	uniprot	H. sapiens	10972	H. sapiens	0.0	0.0	0.0	0.0	1.0	0.0	0.0	0.0	0.0	0.0	0.0	0.0	0.0	0.0	0.0	0.0	0.0	0.0	0.0	0.0
O15226	55922	uniprot	H. sapiens	55922	H. sapiens	0.0	0.0	0.0	0.0	0.0	0.0	0.0	0.0	0.0	0.0	0.0	0.0	0.0	0.0	0.0	0.0	0.0	0.0	0.0	0.0
P05198	1965	uniprot	H. sapiens	1965	H. sapiens	0.0	1.0	0.0	0.0	0.0	1.0	0.0	0.0	0.0	0.0	1.0	0.0	0.0	0.0	0.0	0.0	1.0	0.0	0.0	0.0
Q14011	1153	uniprot	H. sapiens	1153	H. sapiens	0.0	0.0	0.0	0.0	0.0	0.0	0.0	0.0	0.0	0.0	0.0	0.0	0.0	0.0	0.0	0.0	0.0	0.0	0.0	0.0
O75306	4720	uniprot	H. sapiens	4720	H. sapiens	0.0	0.0	0.0	0.0	0.0	0.0	0.0	0.0	0.0	0.0	0.0	0.0	0.0	0.0	1.0	0.0	0.0	0.0	0.0	0.0
P23921	6240	uniprot	H. sapiens	6240	H. sapiens	0.0	0.0	0.0	0.0	0.0	0.0	0.0	0.0	0.0	0.0	0.0	0.0	0.0	0.0	0.0	1.0	0.0	0.0	0.0	0.0
O43681	439	uniprot	H. sapiens	439	H. sapiens	0.0	0.0	0.0	0.0	0.0	0.0	0.0	0.0	0.0	0.0	0.0	0.0	0.0	0.0	0.0	0.0	0.0	0.0	0.0	0.0
Q9UMS4	27339	uniprot	H. sapiens	27339	H. sapiens	1.0	0.0	0.0	0.0	0.0	0.0	0.0	1.0	0.0	0.0	0.0	0.0	0.0	0.0	0.0	0.0	0.0	0.0	0.0	0.0
Q9BUQ8	9416	uniprot	H. sapiens	9416	H. sapiens	1.0	0.0	1.0	0.0	0.0	0.0	0.0	0.0	0.0	0.0	0.0	0.0	0.0	0.0	0.0	0.0	0.0	0.0	0.0	0.0
P11234	5899	uniprot	H. sapiens	5899	H. sapiens	0.0	0.0	0.0	0.0	0.0	0.0	0.0	0.0	0.0	0.0	0.0	0.0	0.0	1.0	0.0	0.0	0.0	0.0	0.0	0.0
Q9Y606	80324	uniprot	H. sapiens	80324	H. sapiens	1.0	0.0	0.0	0.0	0.0	0.0	0.0	0.0	0.0	0.0	1.0	0.0	0.0	0.0	0.0	0.0	0.0	0.0	0.0	0.0
Q9BRZ2	81844	uniprot	H. sapiens	81844	H. sapiens	0.0	0.0	0.0	0.0	0.0	0.0	0.0	0.0	0.0	0.0	0.0	0.0	0.0	0.0	0.0	0.0	0.0	0.0	0.0	0.0
Q9NRF9	54107	uniprot	H. sapiens	54107	H. sapiens	0.0	0.0	0.0	1.0	0.0	1.0	0.0	1.0	0.0	0.0	0.0	0.0	0.0	0.0	0.0	0.0	0.0	0.0	0.0	0.0
O43665	6001	uniprot	H. sapiens	6001	H. sapiens	0.0	0.0	0.0	0.0	0.0	0.0	0.0	0.0	0.0	0.0	0.0	0.0	0.0	0.0	0.0	0.0	0.0	0.0	0.0	0.0
Q14152	8661	uniprot	H. sapiens	8661	H. sapiens	0.0	1.0	0.0	0.0	0.0	0.0	0.0	0.0	0.0	0.0	0.0	0.0	0.0	0.0	0.0	0.0	0.0	0.0	0.0	0.0
Q9GZZ1	80218	uniprot	H. sapiens	80218	H. sapiens	0.0	0.0	0.0	0.0	0.0	0.0	0.0	0.0	0.0	0.0	0.0	0.0	0.0	0.0	0.0	0.0	0.0	0.0	0.0	0.0
P45973	23468	uniprot	H. sapiens	23468	H. sapiens	0.0	0.0	0.0	0.0	0.0	0.0	0.0	0.0	0.0	0.0	1.0	0.0	0.0	0.0	0.0	0.0	0.0	0.0	0.0	0.0
Q9UMX5	29937	uniprot	H. sapiens	29937	H. sapiens	0.0	0.0	0.0	0.0	0.0	0.0	0.0	0.0	0.0	0.0	0.0	0.0	0.0	0.0	0.0	0.0	0.0	0.0	0.0	0.0
Q9HC38	51031	uniprot	H. sapiens	51031	H. sapiens	0.0	0.0	0.0	0.0	0.0	0.0	0.0	0.0	0.0	0.0	0.0	0.0	0.0	0.0	0.0	0.0	0.0	0.0	0.0	0.0
P61081	9040	uniprot	H. sapiens	9040	H. sapiens	0.0	0.0	0.0	0.0	0.0	1.0	0.0	0.0	0.0	0.0	0.0	0.0	0.0	0.0	0.0	0.0	0.0	0.0	0.0	0.0
Q13907	3422	uniprot	H. sapiens	3422	H. sapiens	0.0	0.0	0.0	0.0	0.0	0.0	0.0	0.0	0.0	0.0	0.0	0.0	0.0	0.0	0.0	0.0	0.0	0.0	0.0	0.0
Q00169	5306	uniprot	H. sapiens	5306	H. sapiens	0.0	1.0	0.0	0.0	0.0	1.0	0.0	0.0	0.0	0.0	0.0	0.0	0.0	0.0	0.0	0.0	0.0	0.0	0.0	1.0
Q9NZ32	55860	uniprot	H. sapiens	55860	H. sapiens	0.0	1.0	0.0	0.0	1.0	1.0	1.0	0.0	0.0	0.0	0.0	0.0	0.0	0.0	0.0	0.0	0.0	0.0	0.0	0.0
Q96P70	55705	uniprot	H. sapiens	55705	H. sapiens	0.0	0.0	0.0	0.0	0.0	0.0	0.0	0.0	0.0	0.0	0.0	0.0	0.0	0.0	0.0	0.0	0.0	0.0	0.0	0.0
Q92804	8148	uniprot	H. sapiens	8148	H. sapiens	0.0	1.0	1.0	0.0	0.0	0.0	0.0	1.0	0.0	0.0	0.0	0.0	0.0	0.0	0.0	0.0	0.0	0.0	0.0	0.0
Q9Y2V2	23589	uniprot	H. sapiens	23589	H. sapiens	0.0	0.0	0.0	0.0	0.0	0.0	0.0	0.0	0.0	0.0	0.0	0.0	0.0	0.0	0.0	0.0	0.0	0.0	0.0	0.0
O95302	11328	uniprot	H. sapiens	11328	H. sapiens	0.0	0.0	0.0	0.0	0.0	0.0	0.0	0.0	0.0	0.0	0.0	0.0	0.0	0.0	0.0	0.0	0.0	0.0	0.0	0.0
P19623	6723	uniprot	H. sapiens	6723	H. sapiens	0.0	1.0	0.0	0.0	0.0	1.0	0.0	0.0	0.0	0.0	0.0	0.0	0.0	0.0	0.0	0.0	0.0	0.0	0.0	0.0
Q14204	1778	uniprot	H. sapiens	1778	H. sapiens	0.0	1.0	0.0	1.0	1.0	1.0	1.0	0.0	1.0	0.0	1.0	0.0	0.0	0.0	0.0	0.0	0.0	0.0	0.0	0.0
P50583	318	uniprot	H. sapiens	318	H. sapiens	0.0	1.0	0.0	0.0	0.0	1.0	0.0	0.0	0.0	0.0	0.0	0.0	0.0	0.0	0.0	0.0	0.0	0.0	0.0	0.0
Q9NPA8	56943	uniprot	H. sapiens	56943	H. sapiens	0.0	0.0	0.0	0.0	0.0	0.0	0.0	0.0	0.0	0.0	0.0	0.0	0.0	0.0	0.0	0.0	0.0	0.0	0.0	0.0
Q10472	2589	uniprot	H. sapiens	2589	H. sapiens	0.0	1.0	0.0	0.0	1.0	0.0	0.0	0.0	0.0	0.0	0.0	0.0	0.0	0.0	0.0	0.0	0.0	1.0	0.0	0.0
O95373	10527	uniprot	H. sapiens	10527	H. sapiens	0.0	0.0	0.0	0.0	0.0	0.0	0.0	0.0	0.0	0.0	0.0	0.0	0.0	0.0	0.0	0.0	0.0	0.0	0.0	0.0
P07741	353	uniprot	H. sapiens	353	H. sapiens	0.0	0.0	0.0	0.0	0.0	0.0	1.0	0.0	0.0	0.0	0.0	0.0	0.0	0.0	0.0	1.0	0.0	0.0	0.0	0.0
Q96CT7	115098	uniprot	H. sapiens	115098	H. sapiens	0.0	0.0	0.0	0.0	0.0	0.0	0.0	0.0	0.0	0.0	0.0	0.0	0.0	0.0	0.0	0.0	0.0	0.0	0.0	0.0
Q9BTT0	81611	uniprot	H. sapiens	81611	H. sapiens	0.0	0.0	0.0	0.0	0.0	0.0	0.0	0.0	0.0	0.0	0.0	0.0	0.0	0.0	0.0	0.0	0.0	0.0	0.0	0.0
P49821	4723	uniprot	H. sapiens	4723	H. sapiens	0.0	0.0	0.0	0.0	0.0	0.0	0.0	0.0	0.0	0.0	0.0	1.0	0.0	0.0	1.0	0.0	0.0	0.0	0.0	0.0
P14866	3191	uniprot	H. sapiens	3191	H. sapiens	0.0	0.0	0.0	0.0	0.0	0.0	0.0	0.0	0.0	0.0	0.0	0.0	0.0	0.0	0.0	0.0	0.0	0.0	0.0	0.0
Q9HAB8	79717	uniprot	H. sapiens	79717	H. sapiens	0.0	0.0	0.0	0.0	0.0	0.0	0.0	0.0	0.0	0.0	0.0	0.0	0.0	0.0	0.0	0.0	0.0	0.0	0.0	0.0
O00170	9049	uniprot	H. sapiens	9049	H. sapiens	0.0	0.0	0.0	0.0	0.0	1.0	0.0	0.0	0.0	0.0	0.0	0.0	0.0	0.0	0.0	0.0	0.0	0.0	0.0	1.0
Q9H4A5	55204	uniprot	H. sapiens	55204	H. sapiens	0.0	0.0	0.0	0.0	0.0	0.0	0.0	0.0	0.0	0.0	0.0	0.0	0.0	0.0	0.0	0.0	0.0	0.0	0.0	0.0
P29372	4350	uniprot	H. sapiens	4350	H. sapiens	0.0	0.0	0.0	0.0	0.0	0.0	0.0	0.0	0.0	0.0	0.0	0.0	0.0	0.0	0.0	0.0	0.0	0.0	0.0	0.0
Q9H3P7	64746	uniprot	H. sapiens	64746	H. sapiens	0.0	0.0	0.0	0.0	1.0	0.0	0.0	0.0	0.0	0.0	0.0	0.0	0.0	0.0	0.0	0.0	0.0	0.0	0.0	0.0
Q8IV08	23646	uniprot	H. sapiens	23646	H. sapiens	0.0	0.0	0.0	0.0	0.0	0.0	0.0	0.0	0.0	0.0	0.0	0.0	0.0	0.0	0.0	0.0	0.0	0.0	0.0	0.0
P17812	1503	uniprot	H. sapiens	1503	H. sapiens	0.0	0.0	0.0	0.0	0.0	0.0	0.0	0.0	0.0	0.0	0.0	0.0	0.0	0.0	0.0	1.0	0.0	0.0	0.0	0.0
Q9H223	30844	uniprot	H. sapiens	30844	H. sapiens	0.0	0.0	0.0	0.0	0.0	0.0	0.0	0.0	0.0	0.0	0.0	0.0	0.0	0.0	0.0	0.0	0.0	0.0	0.0	0.0
Q15836	9341	uniprot	H. sapiens	9341	H. sapiens	0.0	0.0	0.0	0.0	1.0	1.0	0.0	0.0	1.0	0.0	0.0	0.0	0.0	0.0	0.0	0.0	0.0	0.0	0.0	0.0
O60927	6992	uniprot	H. sapiens	6992	H. sapiens	0.0	0.0	0.0	0.0	0.0	0.0	0.0	0.0	0.0	0.0	0.0	0.0	0.0	0.0	0.0	0.0	0.0	0.0	0.0	0.0
Q9C005	84661	uniprot	H. sapiens	84661	H. sapiens	0.0	0.0	0.0	0.0	0.0	1.0	0.0	0.0	0.0	0.0	0.0	0.0	0.0	0.0	0.0	0.0	0.0	0.0	0.0	0.0
Q9BX68	84681	uniprot	H. sapiens	84681	H. sapiens	0.0	0.0	0.0	0.0	0.0	0.0	0.0	0.0	1.0	0.0	0.0	0.0	0.0	0.0	0.0	0.0	0.0	0.0	0.0	0.0
Q07352	677	uniprot	H. sapiens	677	H. sapiens	1.0	0.0	0.0	0.0	0.0	1.0	0.0	0.0	0.0	0.0	0.0	0.0	0.0	0.0	0.0	0.0	0.0	0.0	0.0	0.0
Q8WZA9	126298	uniprot	H. sapiens	126298	H. sapiens	0.0	0.0	0.0	0.0	0.0	0.0	0.0	0.0	0.0	0.0	0.0	0.0	0.0	0.0	0.0	0.0	0.0	0.0	0.0	0.0
P10768	2098	uniprot	H. sapiens	2098	H. sapiens	0.0	0.0	0.0	0.0	0.0	0.0	0.0	0.0	0.0	0.0	0.0	0.0	0.0	0.0	0.0	0.0	0.0	0.0	0.0	0.0
P49770	8892	uniprot	H. sapiens	8892	H. sapiens	0.0	1.0	0.0	0.0	0.0	0.0	0.0	0.0	0.0	0.0	0.0	0.0	0.0	0.0	0.0	0.0	0.0	0.0	0.0	0.0
O14618	9973	uniprot	H. sapiens	9973	H. sapiens	0.0	1.0	0.0	0.0	0.0	1.0	0.0	0.0	0.0	0.0	0.0	0.0	0.0	0.0	0.0	0.0	0.0	0.0	0.0	0.0
Q96A49	94056	uniprot	H. sapiens	94056	H. sapiens	0.0	0.0	0.0	0.0	0.0	0.0	0.0	0.0	0.0	0.0	0.0	0.0	0.0	0.0	0.0	0.0	0.0	0.0	0.0	0.0
Q8WUA2	85313	uniprot	H. sapiens	85313	H. sapiens	1.0	0.0	0.0	0.0	0.0	0.0	0.0	0.0	0.0	0.0	0.0	0.0	0.0	0.0	0.0	0.0	0.0	0.0	0.0	0.0
Q92575	23190	uniprot	H. sapiens	23190	H. sapiens	0.0	0.0	0.0	0.0	0.0	0.0	0.0	0.0	0.0	0.0	0.0	0.0	0.0	0.0	0.0	0.0	0.0	0.0	0.0	0.0
Q9Y5B9	11198	uniprot	H. sapiens	11198	H. sapiens	0.0	1.0	1.0	0.0	0.0	0.0	0.0	1.0	0.0	0.0	0.0	0.0	0.0	0.0	0.0	0.0	0.0	0.0	0.0	0.0
O14933	9246	uniprot	H. sapiens	9246	H. sapiens	0.0	1.0	0.0	0.0	0.0	1.0	0.0	1.0	0.0	0.0	1.0	0.0	0.0	0.0	0.0	0.0	0.0	0.0	0.0	0.0
Q13243	6430	uniprot	H. sapiens	6430	H. sapiens	1.0	0.0	0.0	0.0	0.0	0.0	0.0	0.0	0.0	1.0	0.0	0.0	0.0	0.0	0.0	0.0	0.0	0.0	0.0	0.0
P40306	5699	uniprot	H. sapiens	5699	H. sapiens	0.0	0.0	0.0	0.0	0.0	1.0	0.0	0.0	0.0	0.0	0.0	0.0	0.0	0.0	0.0	0.0	0.0	0.0	0.0	0.0
O75531	8815	uniprot	H. sapiens	8815	H. sapiens	0.0	1.0	1.0	1.0	0.0	1.0	0.0	0.0	0.0	0.0	1.0	0.0	0.0	0.0	0.0	0.0	0.0	0.0	0.0	0.0
Q9NRX4	29085	uniprot	H. sapiens	29085	H. sapiens	0.0	0.0	0.0	0.0	0.0	0.0	0.0	0.0	0.0	0.0	0.0	0.0	0.0	0.0	0.0	0.0	0.0	0.0	0.0	0.0
P30519	3163	uniprot	H. sapiens	3163	H. sapiens	0.0	1.0	0.0	0.0	0.0	1.0	1.0	0.0	1.0	0.0	0.0	0.0	0.0	0.0	0.0	0.0	0.0	0.0	0.0	0.0
Q96CM8	80221	uniprot	H. sapiens	80221	H. sapiens	0.0	0.0	0.0	0.0	0.0	0.0	0.0	0.0	0.0	0.0	0.0	0.0	0.0	0.0	0.0	0.0	0.0	0.0	0.0	0.0
O43813	10314	uniprot	H. sapiens	10314	H. sapiens	0.0	0.0	0.0	0.0	0.0	0.0	0.0	0.0	0.0	0.0	0.0	0.0	0.0	0.0	0.0	0.0	0.0	0.0	0.0	0.0
Q8TD19	91754	uniprot	H. sapiens	91754	H. sapiens	0.0	0.0	0.0	1.0	0.0	0.0	0.0	0.0	0.0	0.0	1.0	0.0	0.0	0.0	0.0	0.0	0.0	0.0	0.0	0.0
Q8NFH3	348995	uniprot	H. sapiens	348995	H. sapiens	1.0	1.0	1.0	1.0	0.0	1.0	0.0	0.0	1.0	1.0	1.0	0.0	0.0	0.0	0.0	0.0	0.0	0.0	0.0	0.0
P62072	26519	uniprot	H. sapiens	26519	H. sapiens	0.0	0.0	0.0	0.0	0.0	0.0	0.0	0.0	0.0	0.0	0.0	1.0	0.0	0.0	0.0	0.0	0.0	0.0	0.0	0.0
P00387	1727	uniprot	H. sapiens	1727	H. sapiens	0.0	0.0	0.0	0.0	0.0	0.0	1.0	0.0	0.0	0.0	0.0	0.0	0.0	0.0	0.0	0.0	0.0	0.0	0.0	0.0
Q9H7Z7	80142	uniprot	H. sapiens	80142	H. sapiens	0.0	0.0	0.0	0.0	0.0	0.0	1.0	0.0	0.0	0.0	0.0	0.0	0.0	0.0	0.0	0.0	0.0	0.0	0.0	0.0
Q14764	9961	uniprot	H. sapiens	9961	H. sapiens	0.0	0.0	0.0	0.0	0.0	0.0	1.0	0.0	0.0	0.0	0.0	0.0	0.0	0.0	0.0	0.0	0.0	0.0	0.0	0.0
Q96BW1	139596	uniprot	H. sapiens	139596	H. sapiens	0.0	0.0	0.0	0.0	0.0	0.0	0.0	0.0	0.0	0.0	0.0	0.0	0.0	0.0	0.0	0.0	0.0	0.0	0.0	0.0
O75439	9512	uniprot	H. sapiens	9512	H. sapiens	0.0	0.0	0.0	0.0	0.0	0.0	0.0	0.0	0.0	0.0	0.0	0.0	0.0	0.0	0.0	0.0	0.0	0.0	0.0	0.0
P40938	5983	uniprot	H. sapiens	5983	H. sapiens	0.0	0.0	0.0	1.0	0.0	1.0	0.0	1.0	0.0	0.0	0.0	0.0	0.0	0.0	0.0	0.0	0.0	0.0	0.0	0.0
Q9UBQ7	9380	uniprot	H. sapiens	9380	H. sapiens	0.0	1.0	0.0	0.0	0.0	0.0	0.0	0.0	0.0	0.0	0.0	0.0	0.0	0.0	0.0	0.0	0.0	0.0	0.0	0.0
Q9BYN8	64949	uniprot	H. sapiens	64949	H. sapiens	0.0	1.0	0.0	0.0	0.0	0.0	0.0	0.0	0.0	0.0	0.0	0.0	1.0	0.0	0.0	0.0	0.0	0.0	0.0	0.0
Q9BY42	51507	uniprot	H. sapiens	51507	H. sapiens	0.0	0.0	0.0	0.0	0.0	0.0	0.0	0.0	0.0	0.0	0.0	0.0	0.0	0.0	0.0	0.0	0.0	0.0	0.0	0.0
Q8WXF1	55269	uniprot	H. sapiens	55269	H. sapiens	0.0	0.0	0.0	0.0	0.0	0.0	0.0	0.0	0.0	0.0	0.0	0.0	0.0	0.0	0.0	0.0	0.0	0.0	0.0	0.0
P60510	5531	uniprot	H. sapiens	5531	H. sapiens	0.0	0.0	0.0	0.0	0.0	0.0	0.0	1.0	0.0	0.0	0.0	0.0	0.0	0.0	0.0	0.0	0.0	0.0	0.0	0.0
P17568	4713	uniprot	H. sapiens	4713	H. sapiens	0.0	0.0	0.0	0.0	0.0	0.0	0.0	0.0	0.0	0.0	0.0	0.0	0.0	0.0	1.0	0.0	0.0	0.0	0.0	0.0
P40855	5824	uniprot	H. sapiens	5824	H. sapiens	0.0	0.0	0.0	0.0	0.0	1.0	0.0	0.0	0.0	0.0	0.0	0.0	0.0	0.0	0.0	0.0	0.0	0.0	0.0	0.0
Q96CS3	23197	uniprot	H. sapiens	23197	H. sapiens	0.0	0.0	0.0	0.0	0.0	0.0	1.0	0.0	1.0	0.0	0.0	0.0	0.0	0.0	0.0	0.0	0.0	0.0	0.0	0.0
Q96EY7	55037	uniprot	H. sapiens	55037	H. sapiens	0.0	1.0	0.0	0.0	0.0	0.0	0.0	0.0	0.0	0.0	0.0	0.0	1.0	0.0	0.0	0.0	0.0	0.0	0.0	0.0
P35270	6697	uniprot	H. sapiens	6697	H. sapiens	0.0	0.0	0.0	0.0	0.0	0.0	0.0	0.0	0.0	0.0	0.0	0.0	0.0	0.0	0.0	0.0	0.0	0.0	0.0	0.0
Q9Y5P6	29925	uniprot	H. sapiens	29925	H. sapiens	0.0	0.0	0.0	0.0	1.0	0.0	0.0	0.0	0.0	0.0	0.0	0.0	0.0	0.0	0.0	0.0	0.0	0.0	0.0	0.0
P61225	5912	uniprot	H. sapiens	5912	H. sapiens	0.0	0.0	0.0	0.0	0.0	0.0	1.0	0.0	0.0	0.0	0.0	0.0	0.0	0.0	0.0	0.0	0.0	0.0	0.0	0.0
Q8IY81	117246	uniprot	H. sapiens	117246	H. sapiens	1.0	1.0	0.0	0.0	0.0	0.0	0.0	0.0	0.0	0.0	0.0	0.0	0.0	0.0	0.0	0.0	0.0	0.0	0.0	0.0
P07738	669	uniprot	H. sapiens	669	H. sapiens	0.0	0.0	0.0	0.0	0.0	0.0	0.0	0.0	0.0	0.0	1.0	0.0	0.0	0.0	0.0	0.0	0.0	0.0	0.0	0.0
Q3MHD2	124801	uniprot	H. sapiens	124801	H. sapiens	0.0	0.0	0.0	0.0	0.0	0.0	0.0	0.0	0.0	0.0	0.0	0.0	0.0	0.0	0.0	0.0	0.0	0.0	0.0	0.0
Q9H1E3	64710	uniprot	H. sapiens	64710	H. sapiens	0.0	0.0	0.0	0.0	0.0	0.0	0.0	0.0	0.0	0.0	0.0	0.0	0.0	0.0	0.0	0.0	0.0	0.0	0.0	0.0
O14896	3664	uniprot	H. sapiens	3664	H. sapiens	0.0	0.0	0.0	0.0	0.0	1.0	0.0	0.0	0.0	0.0	1.0	0.0	0.0	0.0	0.0	0.0	0.0	0.0	0.0	0.0
Q92688	10541	uniprot	H. sapiens	10541	H. sapiens	0.0	0.0	0.0	0.0	0.0	0.0	0.0	0.0	0.0	0.0	0.0	0.0	0.0	0.0	0.0	0.0	0.0	0.0	0.0	0.0
Q9UBU9	10482	uniprot	H. sapiens	10482	H. sapiens	1.0	0.0	0.0	0.0	0.0	0.0	0.0	0.0	0.0	1.0	1.0	0.0	0.0	0.0	0.0	0.0	0.0	0.0	0.0	0.0
Q13740	214	uniprot	H. sapiens	214	H. sapiens	0.0	1.0	0.0	0.0	0.0	0.0	0.0	0.0	0.0	0.0	0.0	0.0	0.0	0.0	0.0	0.0	0.0	0.0	0.0	0.0
P36954	5438	uniprot	H. sapiens	5438	H. sapiens	1.0	1.0	1.0	1.0	0.0	0.0	0.0	1.0	0.0	0.0	1.0	0.0	0.0	1.0	0.0	0.0	0.0	0.0	0.0	0.0
P51572	10134	uniprot	H. sapiens	10134	H. sapiens	0.0	1.0	0.0	0.0	0.0	1.0	0.0	0.0	1.0	0.0	0.0	0.0	0.0	0.0	0.0	0.0	0.0	0.0	0.0	0.0
P61201	9318	uniprot	H. sapiens	9318	H. sapiens	0.0	0.0	0.0	0.0	1.0	1.0	0.0	1.0	1.0	0.0	0.0	0.0	0.0	0.0	0.0	0.0	0.0	0.0	0.0	0.0
O75477	10613	uniprot	H. sapiens	10613	H. sapiens	0.0	0.0	0.0	0.0	0.0	1.0	0.0	0.0	0.0	0.0	0.0	0.0	0.0	0.0	0.0	0.0	0.0	0.0	0.0	0.0
P32004	3897	uniprot	H. sapiens	3897	H. sapiens	0.0	1.0	0.0	0.0	0.0	0.0	0.0	0.0	0.0	0.0	0.0	0.0	0.0	0.0	0.0	0.0	0.0	0.0	0.0	0.0
Q99426	1155	uniprot	H. sapiens	1155	H. sapiens	0.0	0.0	0.0	0.0	0.0	0.0	0.0	0.0	0.0	0.0	0.0	0.0	0.0	0.0	0.0	0.0	0.0	0.0	0.0	0.0
P62877	9978	uniprot	H. sapiens	9978	H. sapiens	0.0	1.0	1.0	1.0	0.0	1.0	0.0	1.0	0.0	0.0	0.0	0.0	0.0	1.0	0.0	0.0	0.0	0.0	0.0	0.0
Q5T447	79654	uniprot	H. sapiens	79654	H. sapiens	0.0	0.0	0.0	0.0	0.0	0.0	0.0	0.0	0.0	0.0	0.0	0.0	0.0	0.0	0.0	0.0	0.0	0.0	0.0	0.0
P84103	6428	uniprot	H. sapiens	6428	H. sapiens	1.0	0.0	0.0	0.0	0.0	0.0	0.0	0.0	0.0	1.0	0.0	0.0	0.0	0.0	0.0	0.0	0.0	0.0	0.0	0.0
Q8N8A6	317781	uniprot	H. sapiens	317781	H. sapiens	0.0	0.0	0.0	0.0	0.0	0.0	0.0	0.0	0.0	0.0	0.0	0.0	0.0	0.0	0.0	0.0	0.0	0.0	0.0	0.0
Q9UJX3						nan	nan	nan	nan	nan	nan	nan	nan	nan	nan	nan	nan	nan	nan	nan	nan	nan	nan	nan	nan
O43716	283459	uniprot	H. sapiens	283459	H. sapiens	0.0	0.0	0.0	0.0	0.0	0.0	0.0	0.0	0.0	0.0	0.0	0.0	0.0	0.0	0.0	0.0	0.0	0.0	0.0	0.0
Q9Y3D0	51647	uniprot	H. sapiens	51647	H. sapiens	0.0	0.0	0.0	0.0	0.0	0.0	0.0	0.0	0.0	0.0	0.0	0.0	0.0	0.0	0.0	0.0	0.0	0.0	0.0	0.0
P56962	55014	uniprot	H. sapiens	55014	H. sapiens	0.0	0.0	0.0	0.0	1.0	0.0	0.0	0.0	0.0	0.0	0.0	0.0	0.0	0.0	0.0	0.0	0.0	0.0	0.0	0.0
Q9ULX3	28987	uniprot	H. sapiens	28987	H. sapiens	1.0	1.0	0.0	0.0	0.0	0.0	0.0	0.0	0.0	0.0	0.0	0.0	0.0	0.0	0.0	0.0	0.0	0.0	0.0	0.0
Q9UH62	51566	uniprot	H. sapiens	51566	H. sapiens	0.0	0.0	0.0	0.0	0.0	0.0	0.0	0.0	1.0	0.0	0.0	0.0	0.0	0.0	0.0	0.0	0.0	0.0	0.0	0.0
Q9H1Z4	64743	uniprot	H. sapiens	64743	H. sapiens	0.0	0.0	0.0	0.0	0.0	0.0	0.0	0.0	0.0	0.0	0.0	0.0	0.0	0.0	0.0	0.0	0.0	0.0	0.0	0.0
P29083	2960	uniprot	H. sapiens	2960	H. sapiens	0.0	1.0	1.0	0.0	0.0	0.0	0.0	0.0	0.0	0.0	0.0	0.0	0.0	0.0	0.0	0.0	0.0	0.0	0.0	0.0
Q32P44	256364	uniprot	H. sapiens	256364	H. sapiens	0.0	0.0	0.0	0.0	0.0	0.0	0.0	0.0	0.0	0.0	0.0	0.0	0.0	0.0	0.0	0.0	0.0	0.0	0.0	0.0
Q9HD33	57129	uniprot	H. sapiens	57129	H. sapiens	0.0	1.0	0.0	0.0	0.0	0.0	0.0	0.0	0.0	0.0	0.0	0.0	1.0	0.0	0.0	0.0	0.0	0.0	0.0	0.0
Q16543	11140	uniprot	H. sapiens	11140	H. sapiens	0.0	0.0	0.0	0.0	0.0	1.0	0.0	0.0	1.0	0.0	0.0	0.0	0.0	1.0	0.0	0.0	0.0	0.0	0.0	0.0
Q96AT1	57456	uniprot	H. sapiens	57456	H. sapiens	0.0	0.0	0.0	0.0	0.0	0.0	0.0	0.0	0.0	0.0	0.0	0.0	0.0	0.0	0.0	0.0	0.0	0.0	0.0	0.0
Q8N983	84545	uniprot	H. sapiens	84545	H. sapiens	0.0	0.0	0.0	0.0	0.0	0.0	0.0	0.0	0.0	0.0	0.0	0.0	0.0	0.0	0.0	0.0	0.0	0.0	0.0	0.0
Q00534	1021	uniprot	H. sapiens	1021	H. sapiens	0.0	1.0	0.0	1.0	0.0	1.0	0.0	0.0	0.0	0.0	0.0	0.0	0.0	0.0	0.0	0.0	0.0	0.0	0.0	0.0
P16104	3014	uniprot	H. sapiens	3014	H. sapiens	0.0	1.0	1.0	1.0	0.0	1.0	0.0	1.0	1.0	0.0	1.0	0.0	0.0	0.0	0.0	0.0	0.0	0.0	0.0	0.0
Q9UK41	51160	uniprot	H. sapiens	51160	H. sapiens	0.0	0.0	0.0	0.0	0.0	0.0	0.0	0.0	0.0	0.0	0.0	0.0	0.0	0.0	0.0	0.0	0.0	0.0	0.0	0.0
P09001	11222	uniprot	H. sapiens	11222	H. sapiens	0.0	1.0	0.0	0.0	0.0	0.0	0.0	0.0	0.0	0.0	0.0	0.0	1.0	0.0	0.0	0.0	0.0	0.0	0.0	0.0
P40222	200081	uniprot	H. sapiens	200081	H. sapiens	0.0	0.0	0.0	0.0	0.0	1.0	0.0	0.0	0.0	0.0	0.0	0.0	0.0	0.0	0.0	0.0	0.0	0.0	0.0	0.0
P62851	6230	uniprot	H. sapiens	6230	H. sapiens	1.0	1.0	0.0	0.0	0.0	0.0	0.0	0.0	0.0	0.0	0.0	0.0	0.0	0.0	0.0	0.0	0.0	0.0	0.0	0.0
Q9BPX5	81873	uniprot	H. sapiens	81873	H. sapiens	0.0	0.0	0.0	0.0	0.0	0.0	0.0	0.0	0.0	0.0	0.0	0.0	0.0	0.0	0.0	0.0	0.0	0.0	0.0	0.0
Q7Z569	8315	uniprot	H. sapiens	8315	H. sapiens	0.0	0.0	0.0	0.0	0.0	1.0	0.0	0.0	0.0	0.0	0.0	0.0	0.0	1.0	0.0	0.0	0.0	0.0	0.0	0.0
Q6UXN9	80335	uniprot	H. sapiens	80335	H. sapiens	0.0	0.0	0.0	0.0	0.0	0.0	0.0	0.0	0.0	0.0	0.0	0.0	0.0	0.0	0.0	0.0	0.0	0.0	0.0	0.0
Q96GW9	92935	uniprot	H. sapiens	92935	H. sapiens	0.0	1.0	0.0	0.0	0.0	0.0	0.0	0.0	0.0	0.0	0.0	0.0	0.0	0.0	0.0	0.0	0.0	0.0	0.0	0.0
Q14320	9130	uniprot	H. sapiens	9130	H. sapiens	1.0	0.0	0.0	0.0	0.0	0.0	0.0	0.0	0.0	0.0	0.0	0.0	0.0	0.0	0.0	0.0	0.0	0.0	0.0	0.0
P26583	3148	uniprot	H. sapiens	3148	H. sapiens	0.0	0.0	0.0	0.0	0.0	0.0	0.0	0.0	0.0	0.0	0.0	0.0	0.0	0.0	0.0	0.0	0.0	0.0	0.0	0.0
Q96JH7	80124	uniprot	H. sapiens	80124	H. sapiens	0.0	0.0	0.0	0.0	0.0	1.0	0.0	0.0	0.0	0.0	0.0	0.0	0.0	0.0	0.0	0.0	0.0	0.0	0.0	0.0
P61758	7411	uniprot	H. sapiens	7411	H. sapiens	0.0	0.0	0.0	0.0	0.0	0.0	0.0	0.0	0.0	0.0	0.0	0.0	0.0	0.0	0.0	0.0	0.0	0.0	0.0	0.0
P62277	6207	uniprot	H. sapiens	6207	H. sapiens	1.0	1.0	0.0	0.0	0.0	0.0	0.0	0.0	0.0	0.0	0.0	0.0	0.0	0.0	0.0	0.0	0.0	0.0	0.0	0.0
P53582	23173	uniprot	H. sapiens	23173	H. sapiens	0.0	0.0	0.0	0.0	0.0	0.0	0.0	0.0	0.0	0.0	0.0	0.0	0.0	0.0	0.0	0.0	0.0	0.0	0.0	0.0
O75821	8666	uniprot	H. sapiens	8666	H. sapiens	0.0	1.0	0.0	0.0	0.0	0.0	0.0	0.0	0.0	0.0	0.0	0.0	0.0	0.0	0.0	0.0	0.0	0.0	0.0	0.0
Q14165	9761	uniprot	H. sapiens	9761	H. sapiens	0.0	0.0	0.0	0.0	1.0	0.0	1.0	0.0	0.0	0.0	0.0	0.0	0.0	0.0	0.0	0.0	0.0	1.0	0.0	0.0
Q6NXE6	93436	uniprot	H. sapiens	93436	H. sapiens	0.0	0.0	0.0	0.0	0.0	0.0	0.0	0.0	0.0	0.0	0.0	0.0	0.0	0.0	0.0	0.0	0.0	0.0	0.0	0.0
Q9UFW8	8545	uniprot	H. sapiens	8545	H. sapiens	0.0	0.0	0.0	0.0	0.0	0.0	0.0	0.0	0.0	0.0	0.0	0.0	0.0	0.0	0.0	0.0	0.0	0.0	0.0	0.0
Q15459	10291	uniprot	H. sapiens	10291	H. sapiens	1.0	0.0	0.0	0.0	0.0	0.0	0.0	0.0	0.0	0.0	0.0	0.0	0.0	0.0	0.0	0.0	0.0	0.0	0.0	0.0
P52294	3836	uniprot	H. sapiens	3836	H. sapiens	0.0	1.0	1.0	0.0	0.0	1.0	0.0	0.0	0.0	0.0	1.0	0.0	0.0	0.0	0.0	0.0	0.0	1.0	0.0	0.0
P11441	8266	uniprot	H. sapiens	8266	H. sapiens	0.0	0.0	0.0	0.0	0.0	0.0	0.0	0.0	0.0	0.0	0.0	0.0	0.0	0.0	0.0	0.0	0.0	0.0	0.0	0.0
P52272	4670	uniprot	H. sapiens	4670	H. sapiens	1.0	0.0	1.0	0.0	0.0	0.0	0.0	0.0	0.0	0.0	0.0	0.0	0.0	1.0	0.0	0.0	0.0	0.0	0.0	0.0
Q96RQ3	56922	uniprot	H. sapiens	56922	H. sapiens	0.0	1.0	0.0	0.0	0.0	0.0	0.0	0.0	0.0	0.0	0.0	0.0	0.0	0.0	0.0	0.0	0.0	0.0	0.0	0.0
P48643	22948	uniprot	H. sapiens	22948	H. sapiens	0.0	0.0	0.0	0.0	0.0	0.0	0.0	0.0	0.0	0.0	0.0	0.0	0.0	0.0	0.0	0.0	0.0	0.0	0.0	0.0
Q969Z0	9238	uniprot	H. sapiens	9238	H. sapiens	1.0	0.0	0.0	0.0	0.0	0.0	0.0	0.0	0.0	0.0	0.0	0.0	0.0	0.0	0.0	0.0	0.0	0.0	0.0	0.0
Q9NUY8	55773	uniprot	H. sapiens	55773	H. sapiens	0.0	0.0	0.0	0.0	0.0	0.0	0.0	0.0	0.0	0.0	0.0	0.0	0.0	0.0	0.0	0.0	0.0	0.0	0.0	0.0
O00487	10213	uniprot	H. sapiens	10213	H. sapiens	1.0	1.0	1.0	1.0	0.0	1.0	1.0	0.0	0.0	0.0	0.0	0.0	0.0	1.0	0.0	0.0	0.0	0.0	0.0	0.0
O76003	10539	uniprot	H. sapiens	10539	H. sapiens	0.0	0.0	0.0	0.0	0.0	0.0	0.0	0.0	0.0	0.0	0.0	0.0	0.0	0.0	0.0	0.0	0.0	0.0	0.0	0.0
O00115	1777	uniprot	H. sapiens	1777	H. sapiens	0.0	0.0	0.0	0.0	1.0	0.0	0.0	0.0	0.0	0.0	0.0	0.0	0.0	0.0	0.0	0.0	0.0	0.0	0.0	0.0
Q14554	10954	uniprot	H. sapiens	10954	H. sapiens	0.0	1.0	0.0	0.0	0.0	0.0	0.0	0.0	0.0	0.0	0.0	0.0	0.0	0.0	0.0	0.0	1.0	0.0	0.0	0.0
Q9Y295	4733	uniprot	H. sapiens	4733	H. sapiens	0.0	0.0	0.0	0.0	0.0	0.0	0.0	0.0	0.0	0.0	0.0	0.0	0.0	0.0	0.0	0.0	0.0	0.0	0.0	0.0
Q8NFH5	129401	uniprot	H. sapiens	129401	H. sapiens	1.0	1.0	1.0	1.0	0.0	1.0	0.0	0.0	0.0	1.0	1.0	0.0	0.0	0.0	0.0	0.0	0.0	0.0	0.0	0.0
P19525	5610	uniprot	H. sapiens	5610	H. sapiens	0.0	1.0	0.0	0.0	0.0	1.0	0.0	0.0	0.0	0.0	1.0	0.0	0.0	0.0	0.0	0.0	0.0	0.0	0.0	0.0
Q96AX1	65082	uniprot	H. sapiens	65082	H. sapiens	0.0	1.0	0.0	0.0	0.0	0.0	0.0	0.0	0.0	0.0	0.0	0.0	0.0	0.0	0.0	0.0	0.0	0.0	0.0	0.0
Q9Y5U2	10078	uniprot	H. sapiens	10078	H. sapiens	0.0	0.0	0.0	0.0	0.0	0.0	0.0	0.0	0.0	0.0	0.0	0.0	0.0	0.0	0.0	0.0	0.0	0.0	0.0	0.0
O43583	8562	uniprot	H. sapiens	8562	H. sapiens	0.0	0.0	0.0	0.0	0.0	0.0	0.0	0.0	0.0	0.0	0.0	0.0	0.0	0.0	0.0	0.0	0.0	0.0	0.0	0.0
Q6AI12	91369	uniprot	H. sapiens	91369	H. sapiens	0.0	0.0	0.0	0.0	0.0	0.0	0.0	0.0	0.0	0.0	0.0	0.0	0.0	0.0	0.0	0.0	0.0	0.0	0.0	0.0
Q96AY3	60681	uniprot	H. sapiens	60681	H. sapiens	0.0	0.0	0.0	0.0	0.0	0.0	0.0	0.0	0.0	0.0	0.0	0.0	0.0	0.0	0.0	0.0	0.0	0.0	0.0	0.0
Q15654	7205	uniprot	H. sapiens	7205	H. sapiens	0.0	0.0	0.0	0.0	0.0	0.0	0.0	0.0	0.0	0.0	0.0	0.0	0.0	0.0	0.0	0.0	0.0	0.0	0.0	0.0
Q9GZU8	80011	uniprot	H. sapiens	80011	H. sapiens	0.0	0.0	0.0	0.0	0.0	0.0	0.0	0.0	0.0	0.0	0.0	0.0	0.0	0.0	0.0	0.0	0.0	0.0	0.0	0.0
Q99459	988	uniprot	H. sapiens	988	H. sapiens	1.0	0.0	0.0	0.0	0.0	0.0	0.0	0.0	0.0	0.0	0.0	0.0	0.0	0.0	0.0	0.0	0.0	0.0	0.0	0.0
O00625	8544	uniprot	H. sapiens	8544	H. sapiens	0.0	0.0	0.0	0.0	0.0	0.0	0.0	0.0	0.0	0.0	0.0	0.0	0.0	0.0	0.0	0.0	0.0	0.0	0.0	0.0
P55145	7873	uniprot	H. sapiens	7873	H. sapiens	0.0	0.0	0.0	0.0	0.0	0.0	0.0	0.0	0.0	0.0	0.0	0.0	0.0	0.0	0.0	0.0	0.0	0.0	0.0	0.0
Q9BSF4	90580	uniprot	H. sapiens	90580	H. sapiens	0.0	0.0	0.0	0.0	0.0	0.0	0.0	0.0	0.0	0.0	0.0	0.0	0.0	0.0	0.0	0.0	0.0	0.0	0.0	0.0
Q9BZX2	7371	uniprot	H. sapiens	7371	H. sapiens	0.0	0.0	0.0	0.0	0.0	0.0	0.0	0.0	0.0	0.0	0.0	0.0	0.0	0.0	0.0	1.0	0.0	0.0	0.0	0.0
Q6RFH5	54663	uniprot	H. sapiens	54663	H. sapiens	0.0	0.0	0.0	0.0	0.0	0.0	0.0	0.0	0.0	0.0	0.0	0.0	0.0	0.0	0.0	0.0	0.0	0.0	0.0	0.0
Q12996	1479	uniprot	H. sapiens	1479	H. sapiens	1.0	0.0	0.0	0.0	0.0	0.0	0.0	0.0	0.0	1.0	0.0	0.0	0.0	0.0	0.0	0.0	0.0	0.0	0.0	0.0
P07203	2876	uniprot	H. sapiens	2876	H. sapiens	0.0	1.0	0.0	0.0	0.0	1.0	0.0	0.0	0.0	0.0	0.0	0.0	0.0	0.0	0.0	0.0	0.0	0.0	0.0	0.0
P14174	4282	uniprot	H. sapiens	4282	H. sapiens	0.0	0.0	0.0	0.0	0.0	1.0	1.0	0.0	0.0	0.0	0.0	0.0	0.0	0.0	0.0	0.0	0.0	0.0	0.0	1.0
Q15021	9918	uniprot	H. sapiens	9918	H. sapiens	0.0	0.0	0.0	1.0	0.0	0.0	0.0	0.0	0.0	0.0	0.0	0.0	0.0	0.0	0.0	0.0	0.0	0.0	0.0	0.0
P55081	4236	uniprot	H. sapiens	4236	H. sapiens	1.0	0.0	0.0	0.0	0.0	0.0	0.0	0.0	0.0	0.0	0.0	0.0	0.0	0.0	0.0	0.0	0.0	0.0	0.0	0.0
P12268	3615	uniprot	H. sapiens	3615	H. sapiens	0.0	1.0	0.0	0.0	0.0	0.0	1.0	0.0	0.0	0.0	0.0	0.0	0.0	0.0	0.0	1.0	0.0	0.0	0.0	0.0
Q9GZZ9	79876	uniprot	H. sapiens	79876	H. sapiens	0.0	0.0	0.0	0.0	0.0	1.0	0.0	0.0	0.0	0.0	0.0	0.0	0.0	0.0	0.0	0.0	0.0	0.0	0.0	0.0
Q96A26	26355	uniprot	H. sapiens	26355	H. sapiens	0.0	0.0	0.0	0.0	0.0	0.0	0.0	0.0	0.0	0.0	0.0	0.0	0.0	0.0	0.0	0.0	0.0	0.0	0.0	0.0
Q14232	1967	uniprot	H. sapiens	1967	H. sapiens	0.0	1.0	0.0	0.0	0.0	0.0	0.0	0.0	0.0	0.0	0.0	0.0	0.0	0.0	0.0	0.0	0.0	0.0	0.0	0.0
Q9BZJ0	51340	uniprot	H. sapiens	51340	H. sapiens	1.0	0.0	0.0	0.0	0.0	0.0	0.0	0.0	0.0	0.0	0.0	0.0	0.0	0.0	0.0	0.0	0.0	0.0	0.0	0.0
P20962	5763	uniprot	H. sapiens	5763	H. sapiens	0.0	0.0	0.0	0.0	0.0	0.0	0.0	0.0	0.0	0.0	0.0	0.0	0.0	0.0	0.0	0.0	0.0	0.0	0.0	0.0
Q9BQ61	79002	uniprot	H. sapiens	79002	H. sapiens	0.0	0.0	0.0	0.0	0.0	0.0	0.0	0.0	0.0	0.0	0.0	0.0	0.0	0.0	0.0	0.0	0.0	0.0	0.0	0.0
Q6NZY4	55596	uniprot	H. sapiens	55596	H. sapiens	0.0	0.0	0.0	0.0	0.0	0.0	0.0	0.0	0.0	0.0	0.0	0.0	0.0	0.0	0.0	0.0	0.0	0.0	0.0	0.0
Q6P3W7	55681	uniprot	H. sapiens	55681	H. sapiens	0.0	0.0	0.0	0.0	0.0	0.0	0.0	0.0	0.0	0.0	0.0	0.0	0.0	0.0	0.0	0.0	0.0	0.0	0.0	0.0
P08238	3326	uniprot	H. sapiens	3326	H. sapiens	0.0	1.0	1.0	1.0	0.0	1.0	1.0	1.0	1.0	0.0	1.0	0.0	0.0	0.0	0.0	0.0	0.0	0.0	0.0	0.0
Q13185	11335	uniprot	H. sapiens	11335	H. sapiens	0.0	0.0	0.0	0.0	0.0	0.0	0.0	0.0	0.0	0.0	0.0	0.0	0.0	0.0	0.0	0.0	0.0	0.0	0.0	0.0
P34931	3305	uniprot	H. sapiens	3305	H. sapiens	0.0	1.0	0.0	0.0	0.0	1.0	0.0	0.0	0.0	0.0	1.0	0.0	0.0	0.0	0.0	0.0	0.0	0.0	0.0	0.0
P09543	1267	uniprot	H. sapiens	1267	H. sapiens	0.0	0.0	0.0	0.0	0.0	0.0	0.0	0.0	0.0	0.0	0.0	0.0	0.0	0.0	0.0	0.0	0.0	0.0	0.0	0.0
Q9GZL7	55759	uniprot	H. sapiens	55759	H. sapiens	1.0	1.0	0.0	0.0	0.0	0.0	0.0	0.0	0.0	0.0	0.0	0.0	0.0	0.0	0.0	0.0	0.0	0.0	0.0	0.0
P30566	158	uniprot	H. sapiens	158	H. sapiens	0.0	0.0	0.0	0.0	0.0	0.0	0.0	0.0	0.0	0.0	0.0	0.0	0.0	0.0	0.0	1.0	0.0	0.0	0.0	0.0
Q9Y265	8607	uniprot	H. sapiens	8607	H. sapiens	0.0	0.0	0.0	1.0	0.0	1.0	0.0	1.0	0.0	0.0	0.0	0.0	0.0	0.0	0.0	0.0	0.0	0.0	0.0	0.0
Q16222	6675	uniprot	H. sapiens	6675	H. sapiens	0.0	0.0	0.0	0.0	1.0	0.0	0.0	0.0	0.0	0.0	0.0	0.0	0.0	0.0	0.0	0.0	0.0	0.0	0.0	0.0
Q14839	1108	uniprot	H. sapiens	1108	H. sapiens	0.0	0.0	0.0	0.0	0.0	0.0	0.0	0.0	0.0	0.0	0.0	0.0	0.0	0.0	0.0	0.0	0.0	0.0	0.0	0.0
Q96S99	79156	uniprot	H. sapiens	79156	H. sapiens	0.0	0.0	0.0	0.0	0.0	0.0	0.0	0.0	0.0	0.0	0.0	0.0	0.0	0.0	0.0	0.0	0.0	0.0	0.0	0.0
P61221	6059	uniprot	H. sapiens	6059	H. sapiens	0.0	0.0	0.0	0.0	0.0	1.0	0.0	0.0	0.0	0.0	1.0	0.0	0.0	0.0	0.0	0.0	0.0	0.0	0.0	0.0
Q9Y5Y2	10101	uniprot	H. sapiens	10101	H. sapiens	0.0	0.0	0.0	0.0	0.0	0.0	0.0	0.0	0.0	0.0	0.0	0.0	0.0	0.0	0.0	0.0	0.0	0.0	0.0	0.0
Q9C0C2	85456	uniprot	H. sapiens	85456	H. sapiens	1.0	0.0	0.0	0.0	0.0	0.0	0.0	1.0	0.0	0.0	0.0	0.0	0.0	0.0	0.0	0.0	0.0	0.0	0.0	0.0
P09234	6631	uniprot	H. sapiens	6631	H. sapiens	1.0	0.0	0.0	0.0	0.0	0.0	0.0	0.0	0.0	0.0	0.0	0.0	0.0	0.0	0.0	0.0	0.0	0.0	0.0	0.0
P23396	6188	uniprot	H. sapiens	6188	H. sapiens	1.0	1.0	0.0	0.0	0.0	0.0	0.0	0.0	0.0	0.0	0.0	0.0	0.0	0.0	0.0	0.0	0.0	0.0	0.0	0.0
Q03135	857	uniprot	H. sapiens	857	H. sapiens	0.0	1.0	1.0	0.0	0.0	1.0	0.0	0.0	1.0	0.0	0.0	0.0	0.0	1.0	0.0	0.0	0.0	0.0	0.0	0.0
Q12907	10960	uniprot	H. sapiens	10960	H. sapiens	0.0	0.0	0.0	0.0	1.0	0.0	0.0	0.0	0.0	0.0	0.0	0.0	0.0	0.0	0.0	0.0	0.0	0.0	0.0	0.0
P51148	5878	uniprot	H. sapiens	5878	H. sapiens	0.0	1.0	0.0	0.0	1.0	0.0	1.0	0.0	0.0	0.0	0.0	0.0	0.0	0.0	0.0	0.0	0.0	0.0	0.0	0.0
P62987	7311	uniprot	H. sapiens	7311	H. sapiens	1.0	1.0	1.0	1.0	1.0	1.0	0.0	1.0	0.0	0.0	1.0	0.0	0.0	1.0	1.0	0.0	0.0	1.0	0.0	0.0
Q9C0B5	25921	uniprot	H. sapiens	25921	H. sapiens	0.0	1.0	0.0	0.0	0.0	0.0	0.0	0.0	0.0	0.0	0.0	0.0	0.0	0.0	0.0	0.0	0.0	1.0	0.0	0.0
Q9UL25	23011	uniprot	H. sapiens	23011	H. sapiens	0.0	0.0	0.0	0.0	1.0	0.0	0.0	0.0	0.0	0.0	0.0	0.0	0.0	0.0	0.0	0.0	0.0	0.0	0.0	0.0
Q6IQ22	201475	uniprot	H. sapiens	201475	H. sapiens	0.0	0.0	0.0	0.0	1.0	0.0	0.0	0.0	0.0	0.0	0.0	0.0	0.0	0.0	0.0	0.0	0.0	0.0	0.0	0.0
Q86V81	10189	uniprot	H. sapiens	10189	H. sapiens	1.0	0.0	0.0	0.0	0.0	0.0	0.0	0.0	0.0	1.0	1.0	0.0	0.0	0.0	0.0	0.0	0.0	0.0	0.0	0.0
Q9BTE6	80755	uniprot	H. sapiens	80755	H. sapiens	0.0	0.0	0.0	0.0	0.0	0.0	0.0	0.0	0.0	0.0	0.0	0.0	0.0	0.0	0.0	0.0	0.0	0.0	0.0	0.0
Q16774-2						nan	nan	nan	nan	nan	nan	nan	nan	nan	nan	nan	nan	nan	nan	nan	nan	nan	nan	nan	nan
Q9Y490-2						nan	nan	nan	nan	nan	nan	nan	nan	nan	nan	nan	nan	nan	nan	nan	nan	nan	nan	nan	nan
Q86V21	65985	uniprot	H. sapiens	65985	H. sapiens	0.0	0.0	0.0	0.0	0.0	0.0	0.0	0.0	0.0	0.0	0.0	0.0	0.0	0.0	0.0	0.0	0.0	0.0	0.0	0.0
O43252	9061	uniprot	H. sapiens	9061	H. sapiens	0.0	1.0	0.0	0.0	0.0	0.0	0.0	0.0	0.0	0.0	1.0	0.0	0.0	1.0	0.0	0.0	0.0	0.0	0.0	0.0
O14545	10906	uniprot	H. sapiens	10906	H. sapiens	0.0	0.0	0.0	0.0	0.0	0.0	0.0	0.0	0.0	0.0	0.0	0.0	0.0	0.0	0.0	0.0	0.0	0.0	0.0	0.0
Q13641	7162	uniprot	H. sapiens	7162	H. sapiens	0.0	0.0	0.0	0.0	0.0	0.0	0.0	0.0	0.0	0.0	0.0	0.0	0.0	0.0	0.0	0.0	0.0	0.0	0.0	0.0
P45954	36	uniprot	H. sapiens	36	H. sapiens	0.0	1.0	0.0	0.0	0.0	0.0	0.0	0.0	0.0	0.0	0.0	1.0	0.0	0.0	0.0	0.0	0.0	0.0	0.0	0.0
Q02040	8227	uniprot	H. sapiens	8227	H. sapiens	0.0	0.0	0.0	0.0	0.0	0.0	0.0	0.0	0.0	0.0	0.0	0.0	0.0	0.0	0.0	0.0	0.0	0.0	0.0	0.0
Q8WTS6	80854	uniprot	H. sapiens	80854	H. sapiens	0.0	0.0	0.0	0.0	0.0	0.0	0.0	0.0	0.0	0.0	0.0	0.0	0.0	0.0	0.0	0.0	0.0	0.0	0.0	0.0
P63272	6827	uniprot	H. sapiens	6827	H. sapiens	0.0	1.0	1.0	0.0	0.0	0.0	0.0	1.0	0.0	0.0	0.0	0.0	0.0	0.0	0.0	0.0	0.0	0.0	0.0	0.0
Q06203	5471	uniprot	H. sapiens	5471	H. sapiens	0.0	0.0	0.0	0.0	0.0	0.0	0.0	0.0	0.0	0.0	0.0	0.0	0.0	0.0	0.0	1.0	0.0	0.0	0.0	0.0
P36405	403	uniprot	H. sapiens	403	H. sapiens	0.0	0.0	0.0	0.0	0.0	0.0	0.0	0.0	0.0	0.0	0.0	0.0	0.0	0.0	0.0	0.0	0.0	0.0	0.0	0.0
Q7L5D6	51608	uniprot	H. sapiens	51608	H. sapiens	0.0	0.0	0.0	0.0	0.0	0.0	0.0	0.0	0.0	0.0	0.0	0.0	0.0	0.0	0.0	0.0	0.0	0.0	0.0	0.0
Q9NRN7	60496	uniprot	H. sapiens	60496	H. sapiens	0.0	0.0	0.0	0.0	0.0	0.0	0.0	0.0	0.0	0.0	0.0	0.0	0.0	0.0	0.0	0.0	0.0	0.0	0.0	0.0
Q9BW19	3833	uniprot	H. sapiens	3833	H. sapiens	0.0	0.0	0.0	0.0	1.0	0.0	0.0	0.0	0.0	0.0	0.0	0.0	0.0	0.0	0.0	0.0	0.0	0.0	0.0	0.0
Q9HAV7	80273	uniprot	H. sapiens	80273	H. sapiens	0.0	0.0	0.0	0.0	0.0	0.0	0.0	0.0	0.0	0.0	0.0	0.0	0.0	0.0	0.0	0.0	0.0	0.0	0.0	0.0
Q9H6W3	79697	uniprot	H. sapiens	79697	H. sapiens	0.0	0.0	0.0	0.0	0.0	0.0	0.0	0.0	0.0	0.0	0.0	0.0	0.0	0.0	0.0	0.0	0.0	0.0	0.0	0.0
Q9Y314	51070	uniprot	H. sapiens	51070	H. sapiens	0.0	0.0	0.0	0.0	0.0	0.0	0.0	0.0	0.0	0.0	0.0	0.0	0.0	0.0	0.0	0.0	0.0	0.0	0.0	0.0
Q04760	2739	uniprot	H. sapiens	2739	H. sapiens	0.0	0.0	0.0	0.0	0.0	0.0	0.0	0.0	0.0	0.0	0.0	0.0	0.0	0.0	1.0	0.0	0.0	0.0	0.0	0.0
Q9Y230	10856	uniprot	H. sapiens	10856	H. sapiens	0.0	0.0	0.0	1.0	0.0	0.0	0.0	1.0	0.0	0.0	0.0	0.0	0.0	0.0	0.0	0.0	0.0	0.0	0.0	0.0
Q5T5P2	56243	uniprot	H. sapiens	56243	H. sapiens	0.0	0.0	0.0	0.0	0.0	0.0	0.0	0.0	0.0	0.0	0.0	0.0	0.0	0.0	0.0	0.0	0.0	0.0	0.0	0.0
P54727	5887	uniprot	H. sapiens	5887	H. sapiens	0.0	0.0	0.0	0.0	1.0	1.0	0.0	1.0	0.0	0.0	0.0	0.0	0.0	0.0	0.0	0.0	0.0	1.0	0.0	0.0
P43897	10102	uniprot	H. sapiens	10102	H. sapiens	0.0	1.0	0.0	0.0	0.0	0.0	0.0	0.0	0.0	0.0	0.0	0.0	1.0	0.0	0.0	0.0	0.0	0.0	0.0	0.0
Q9H0E3	79595	uniprot	H. sapiens	79595	H. sapiens	0.0	0.0	0.0	0.0	0.0	0.0	0.0	0.0	0.0	0.0	0.0	0.0	0.0	0.0	0.0	0.0	0.0	0.0	0.0	0.0
Q9Y5S9	9939	uniprot	H. sapiens	9939	H. sapiens	0.0	0.0	0.0	0.0	0.0	0.0	0.0	0.0	0.0	0.0	0.0	0.0	0.0	0.0	0.0	0.0	0.0	0.0	0.0	0.0
Q9Y3C6	51645	uniprot	H. sapiens	51645	H. sapiens	1.0	0.0	0.0	0.0	0.0	0.0	0.0	0.0	0.0	0.0	0.0	0.0	0.0	0.0	0.0	0.0	0.0	0.0	0.0	0.0
Q9NRG0	54108	uniprot	H. sapiens	54108	H. sapiens	0.0	0.0	0.0	0.0	0.0	0.0	0.0	0.0	0.0	0.0	0.0	0.0	0.0	0.0	0.0	0.0	0.0	0.0	0.0	0.0
Q7L4I2	65117	uniprot	H. sapiens	65117	H. sapiens	0.0	0.0	0.0	0.0	0.0	0.0	0.0	0.0	0.0	0.0	0.0	0.0	0.0	0.0	0.0	0.0	0.0	0.0	0.0	0.0
Q92538	8729	uniprot	H. sapiens	8729	H. sapiens	0.0	0.0	0.0	0.0	1.0	0.0	0.0	0.0	0.0	0.0	0.0	0.0	0.0	0.0	0.0	0.0	0.0	0.0	0.0	0.0
Q8TDP1	84153	uniprot	H. sapiens	84153	H. sapiens	0.0	0.0	0.0	0.0	0.0	0.0	0.0	0.0	0.0	0.0	0.0	0.0	0.0	0.0	0.0	0.0	0.0	0.0	0.0	0.0
Q8WVY7	134510	uniprot	H. sapiens	134510	H. sapiens	0.0	0.0	0.0	0.0	0.0	0.0	0.0	0.0	0.0	0.0	0.0	0.0	0.0	0.0	0.0	0.0	0.0	0.0	0.0	0.0
P06737	5836	uniprot	H. sapiens	5836	H. sapiens	0.0	0.0	0.0	0.0	0.0	0.0	1.0	0.0	0.0	0.0	1.0	0.0	0.0	0.0	0.0	0.0	0.0	0.0	0.0	0.0
P22059	5007	uniprot	H. sapiens	5007	H. sapiens	0.0	0.0	0.0	0.0	0.0	0.0	0.0	0.0	0.0	0.0	0.0	0.0	0.0	0.0	0.0	0.0	0.0	0.0	0.0	0.0
Q92542	23385	uniprot	H. sapiens	23385	H. sapiens	0.0	1.0	0.0	0.0	0.0	1.0	1.0	0.0	0.0	0.0	0.0	0.0	0.0	1.0	0.0	0.0	0.0	0.0	0.0	0.0
P52630	6773	uniprot	H. sapiens	6773	H. sapiens	0.0	1.0	0.0	0.0	0.0	1.0	0.0	0.0	0.0	0.0	1.0	0.0	0.0	0.0	0.0	0.0	0.0	0.0	0.0	0.0
Q9P1Y6	57661	uniprot	H. sapiens	57661	H. sapiens	0.0	0.0	0.0	0.0	0.0	0.0	0.0	0.0	0.0	0.0	0.0	0.0	0.0	0.0	0.0	0.0	0.0	0.0	0.0	0.0
P05026	481	uniprot	H. sapiens	481	H. sapiens	0.0	1.0	0.0	0.0	0.0	0.0	0.0	0.0	0.0	0.0	0.0	0.0	0.0	0.0	0.0	0.0	0.0	0.0	0.0	0.0
P02533	3861	uniprot	H. sapiens	3861	H. sapiens	0.0	0.0	0.0	0.0	0.0	0.0	0.0	0.0	0.0	0.0	0.0	0.0	0.0	0.0	0.0	0.0	0.0	0.0	0.0	0.0
Q13526	5300	uniprot	H. sapiens	5300	H. sapiens	0.0	0.0	0.0	1.0	0.0	1.0	0.0	1.0	1.0	0.0	1.0	0.0	0.0	0.0	0.0	0.0	0.0	0.0	0.0	0.0
Q8IXK0	1912	uniprot	H. sapiens	1912	H. sapiens	0.0	0.0	0.0	0.0	0.0	0.0	0.0	0.0	0.0	0.0	0.0	0.0	0.0	0.0	0.0	0.0	0.0	0.0	0.0	0.0
P35269	2962	uniprot	H. sapiens	2962	H. sapiens	1.0	1.0	1.0	0.0	0.0	0.0	0.0	1.0	0.0	0.0	1.0	0.0	0.0	1.0	0.0	0.0	0.0	0.0	0.0	0.0
Q96GA3	84946	uniprot	H. sapiens	84946	H. sapiens	1.0	1.0	0.0	0.0	0.0	0.0	0.0	0.0	0.0	0.0	0.0	0.0	0.0	0.0	0.0	0.0	0.0	0.0	0.0	0.0
P49593	9647	uniprot	H. sapiens	9647	H. sapiens	0.0	0.0	0.0	0.0	0.0	0.0	0.0	0.0	0.0	0.0	0.0	0.0	0.0	0.0	0.0	0.0	0.0	0.0	0.0	0.0
Q15434	5939	uniprot	H. sapiens	5939	H. sapiens	0.0	0.0	0.0	0.0	0.0	0.0	0.0	0.0	0.0	0.0	0.0	0.0	0.0	0.0	0.0	0.0	0.0	0.0	0.0	0.0
Q9H6T3	79657	uniprot	H. sapiens	79657	H. sapiens	0.0	0.0	0.0	0.0	0.0	0.0	0.0	0.0	0.0	0.0	0.0	0.0	0.0	0.0	0.0	0.0	0.0	0.0	0.0	0.0
Q9NQZ2	57050	uniprot	H. sapiens	57050	H. sapiens	1.0	1.0	0.0	0.0	0.0	0.0	0.0	0.0	0.0	0.0	0.0	0.0	0.0	0.0	0.0	0.0	0.0	0.0	1.0	0.0
Q7Z422	26099	uniprot	H. sapiens	26099	H. sapiens	0.0	0.0	0.0	0.0	0.0	0.0	0.0	0.0	0.0	0.0	0.0	0.0	0.0	0.0	0.0	0.0	0.0	0.0	0.0	0.0
Q8WYA6	56259	uniprot	H. sapiens	56259	H. sapiens	1.0	0.0	0.0	0.0	0.0	0.0	0.0	0.0	0.0	0.0	0.0	0.0	0.0	0.0	0.0	0.0	0.0	0.0	0.0	0.0
P62424	6130	uniprot	H. sapiens	6130	H. sapiens	1.0	1.0	0.0	0.0	0.0	0.0	0.0	0.0	0.0	0.0	0.0	0.0	0.0	0.0	0.0	0.0	0.0	0.0	0.0	0.0
Q96EY8	326625	uniprot	H. sapiens	326625	H. sapiens	0.0	0.0	0.0	0.0	0.0	0.0	0.0	0.0	0.0	0.0	0.0	0.0	0.0	0.0	0.0	0.0	0.0	0.0	0.0	0.0
Q9Y365	10809	uniprot	H. sapiens	10809	H. sapiens	0.0	0.0	0.0	0.0	0.0	0.0	0.0	0.0	0.0	0.0	0.0	0.0	0.0	0.0	0.0	0.0	0.0	0.0	0.0	0.0
Q5VWZ2	127018	uniprot	H. sapiens	127018	H. sapiens	0.0	0.0	0.0	0.0	0.0	0.0	0.0	0.0	0.0	0.0	0.0	0.0	0.0	0.0	0.0	0.0	0.0	0.0	0.0	0.0
Q9H9B4	94081	uniprot	H. sapiens	94081	H. sapiens	0.0	0.0	0.0	0.0	0.0	0.0	0.0	0.0	0.0	0.0	0.0	0.0	0.0	0.0	0.0	0.0	0.0	0.0	0.0	0.0
Q16795	4704	uniprot	H. sapiens	4704	H. sapiens	0.0	0.0	0.0	0.0	0.0	0.0	0.0	0.0	0.0	0.0	0.0	0.0	0.0	0.0	1.0	0.0	0.0	0.0	0.0	0.0
Q9UL46	5721	uniprot	H. sapiens	5721	H. sapiens	0.0	0.0	0.0	0.0	0.0	1.0	0.0	0.0	0.0	0.0	0.0	0.0	0.0	0.0	0.0	0.0	0.0	0.0	0.0	1.0
Q12789	2975	uniprot	H. sapiens	2975	H. sapiens	0.0	0.0	0.0	0.0	0.0	0.0	0.0	0.0	0.0	0.0	0.0	0.0	0.0	0.0	0.0	0.0	0.0	0.0	0.0	0.0
Q92817	2125	uniprot	H. sapiens	2125	H. sapiens	0.0	0.0	0.0	0.0	0.0	0.0	0.0	0.0	0.0	0.0	0.0	0.0	0.0	0.0	0.0	0.0	0.0	0.0	0.0	0.0
Q96LJ7	115817	uniprot	H. sapiens	115817	H. sapiens	0.0	0.0	0.0	0.0	0.0	0.0	0.0	0.0	0.0	0.0	0.0	0.0	0.0	0.0	0.0	0.0	0.0	0.0	0.0	0.0
P05362	3383	uniprot	H. sapiens	3383	H. sapiens	0.0	0.0	0.0	0.0	0.0	1.0	0.0	0.0	0.0	0.0	1.0	0.0	0.0	0.0	0.0	0.0	0.0	0.0	0.0	0.0
P07942	3912	uniprot	H. sapiens	3912	H. sapiens	0.0	1.0	0.0	0.0	0.0	0.0	0.0	0.0	0.0	0.0	0.0	0.0	0.0	1.0	0.0	0.0	0.0	0.0	0.0	0.0
P04150	2908	uniprot	H. sapiens	2908	H. sapiens	0.0	0.0	0.0	0.0	0.0	0.0	0.0	0.0	0.0	0.0	0.0	0.0	0.0	0.0	0.0	0.0	0.0	0.0	0.0	0.0
Q8IZW8	84951	uniprot	H. sapiens	84951	H. sapiens	0.0	0.0	0.0	0.0	0.0	0.0	0.0	0.0	0.0	0.0	0.0	0.0	0.0	1.0	0.0	0.0	0.0	0.0	0.0	0.0
P54886	5832	uniprot	H. sapiens	5832	H. sapiens	0.0	1.0	0.0	0.0	0.0	0.0	0.0	0.0	0.0	0.0	0.0	0.0	0.0	0.0	0.0	0.0	0.0	0.0	0.0	0.0
P49748	37	uniprot	H. sapiens	37	H. sapiens	0.0	1.0	0.0	0.0	0.0	0.0	0.0	0.0	0.0	0.0	0.0	0.0	0.0	0.0	0.0	0.0	1.0	0.0	0.0	0.0
Q9Y696	25932	uniprot	H. sapiens	25932	H. sapiens	0.0	0.0	0.0	0.0	0.0	0.0	0.0	0.0	0.0	0.0	0.0	0.0	0.0	0.0	0.0	0.0	0.0	0.0	0.0	0.0
P14625	7184	uniprot	H. sapiens	7184	H. sapiens	0.0	1.0	0.0	0.0	1.0	1.0	0.0	0.0	0.0	0.0	0.0	0.0	0.0	0.0	0.0	0.0	1.0	0.0	0.0	0.0
P34897	6472	uniprot	H. sapiens	6472	H. sapiens	0.0	0.0	0.0	0.0	0.0	0.0	0.0	0.0	1.0	0.0	0.0	1.0	0.0	0.0	0.0	0.0	0.0	0.0	0.0	0.0
P61160	10097	uniprot	H. sapiens	10097	H. sapiens	0.0	1.0	0.0	1.0	1.0	0.0	1.0	0.0	1.0	0.0	0.0	0.0	0.0	0.0	0.0	0.0	0.0	0.0	0.0	0.0
Q8IZL8	27043	uniprot	H. sapiens	27043	H. sapiens	1.0	1.0	0.0	0.0	0.0	0.0	0.0	0.0	0.0	0.0	0.0	0.0	0.0	0.0	0.0	0.0	0.0	0.0	0.0	0.0
O00178	9567	uniprot	H. sapiens	9567	H. sapiens	0.0	0.0	0.0	0.0	0.0	0.0	0.0	0.0	0.0	0.0	0.0	0.0	0.0	0.0	0.0	0.0	0.0	0.0	0.0	0.0
Q7L273	54793	uniprot	H. sapiens	54793	H. sapiens	0.0	0.0	0.0	0.0	0.0	0.0	0.0	0.0	0.0	0.0	0.0	0.0	0.0	0.0	0.0	0.0	0.0	0.0	0.0	0.0
O60568	8985	uniprot	H. sapiens	8985	H. sapiens	0.0	0.0	0.0	0.0	0.0	0.0	0.0	0.0	0.0	0.0	0.0	0.0	0.0	0.0	0.0	0.0	0.0	0.0	0.0	0.0
P35580	4628	uniprot	H. sapiens	4628	H. sapiens	0.0	1.0	0.0	1.0	0.0	0.0	0.0	0.0	1.0	0.0	0.0	0.0	0.0	0.0	0.0	0.0	0.0	0.0	0.0	0.0
P62241	6202	uniprot	H. sapiens	6202	H. sapiens	1.0	1.0	0.0	0.0	0.0	0.0	0.0	0.0	0.0	0.0	0.0	0.0	0.0	0.0	0.0	0.0	0.0	0.0	0.0	0.0
P49441	3628	uniprot	H. sapiens	3628	H. sapiens	0.0	0.0	0.0	0.0	0.0	0.0	0.0	0.0	0.0	0.0	0.0	0.0	0.0	0.0	0.0	0.0	0.0	0.0	0.0	0.0
A4D1P6	29062	uniprot	H. sapiens	29062	H. sapiens	0.0	0.0	0.0	0.0	0.0	0.0	0.0	0.0	1.0	0.0	0.0	0.0	0.0	0.0	0.0	0.0	0.0	0.0	0.0	0.0
Q86YV5	157285	uniprot	H. sapiens	157285	H. sapiens	0.0	0.0	0.0	0.0	0.0	0.0	0.0	0.0	1.0	0.0	0.0	0.0	0.0	0.0	0.0	0.0	0.0	0.0	0.0	0.0
P57678	50628	uniprot	H. sapiens	50628	H. sapiens	1.0	1.0	0.0	0.0	0.0	0.0	0.0	0.0	0.0	0.0	1.0	0.0	0.0	0.0	0.0	0.0	0.0	0.0	0.0	0.0
Q8IYI6	149371	uniprot	H. sapiens	149371	H. sapiens	0.0	0.0	0.0	0.0	1.0	0.0	0.0	0.0	0.0	0.0	0.0	0.0	0.0	0.0	0.0	0.0	0.0	0.0	0.0	0.0
Q9NPF4	55644	uniprot	H. sapiens	55644	H. sapiens	1.0	0.0	0.0	0.0	0.0	0.0	0.0	0.0	0.0	0.0	1.0	0.0	0.0	0.0	0.0	0.0	0.0	0.0	0.0	0.0
Q3ZCQ8	92609	uniprot	H. sapiens	92609	H. sapiens	0.0	0.0	0.0	0.0	0.0	0.0	0.0	0.0	0.0	0.0	0.0	0.0	0.0	0.0	0.0	0.0	0.0	0.0	0.0	0.0
O95817	9531	uniprot	H. sapiens	9531	H. sapiens	0.0	1.0	0.0	0.0	0.0	0.0	0.0	0.0	0.0	0.0	1.0	0.0	0.0	0.0	0.0	0.0	0.0	0.0	0.0	0.0
O95721	9342	uniprot	H. sapiens	9342	H. sapiens	0.0	0.0	0.0	0.0	1.0	0.0	1.0	0.0	0.0	0.0	0.0	0.0	0.0	0.0	0.0	0.0	0.0	0.0	0.0	0.0
P53701	3052	uniprot	H. sapiens	3052	H. sapiens	0.0	0.0	0.0	0.0	0.0	0.0	0.0	0.0	0.0	0.0	0.0	0.0	0.0	0.0	1.0	0.0	0.0	0.0	0.0	0.0
Q7L5N1	10980	uniprot	H. sapiens	10980	H. sapiens	0.0	0.0	0.0	0.0	1.0	1.0	0.0	1.0	0.0	0.0	0.0	0.0	0.0	0.0	0.0	0.0	0.0	0.0	0.0	0.0
P83436	91949	uniprot	H. sapiens	91949	H. sapiens	0.0	0.0	0.0	0.0	1.0	0.0	0.0	0.0	0.0	0.0	0.0	0.0	0.0	0.0	0.0	0.0	0.0	0.0	0.0	0.0
Q99798	50	uniprot	H. sapiens	50	H. sapiens	0.0	0.0	0.0	0.0	0.0	0.0	0.0	0.0	0.0	0.0	0.0	1.0	0.0	0.0	1.0	0.0	0.0	0.0	0.0	0.0
P61962	10238	uniprot	H. sapiens	10238	H. sapiens	0.0	0.0	0.0	0.0	0.0	1.0	0.0	0.0	0.0	0.0	0.0	0.0	0.0	0.0	0.0	0.0	0.0	0.0	0.0	0.0
Q15645	9319	uniprot	H. sapiens	9319	H. sapiens	0.0	0.0	0.0	0.0	0.0	0.0	0.0	0.0	0.0	0.0	0.0	0.0	0.0	0.0	0.0	0.0	0.0	0.0	0.0	0.0
Q5T0N5	54874	uniprot	H. sapiens	54874	H. sapiens	0.0	0.0	0.0	0.0	1.0	0.0	0.0	0.0	1.0	0.0	0.0	0.0	0.0	0.0	0.0	0.0	0.0	0.0	0.0	0.0
Q8TB61	347734	uniprot	H. sapiens	347734	H. sapiens	0.0	0.0	0.0	0.0	0.0	0.0	0.0	0.0	0.0	0.0	1.0	0.0	0.0	0.0	0.0	0.0	0.0	0.0	0.0	0.0
O75165	23317	uniprot	H. sapiens	23317	H. sapiens	0.0	0.0	0.0	0.0	0.0	0.0	1.0	0.0	0.0	0.0	0.0	0.0	0.0	0.0	0.0	0.0	0.0	0.0	0.0	0.0
Q6VMQ6	55729	uniprot	H. sapiens	55729	H. sapiens	0.0	0.0	0.0	0.0	0.0	0.0	0.0	0.0	0.0	0.0	0.0	0.0	0.0	0.0	0.0	0.0	0.0	0.0	0.0	0.0
Q9Y312	25980	uniprot	H. sapiens	25980	H. sapiens	0.0	0.0	0.0	0.0	0.0	0.0	0.0	0.0	0.0	0.0	0.0	0.0	0.0	0.0	0.0	0.0	0.0	0.0	0.0	0.0
Q9Y6K9	8517	uniprot	H. sapiens	8517	H. sapiens	0.0	1.0	0.0	0.0	0.0	1.0	0.0	0.0	0.0	0.0	1.0	0.0	0.0	0.0	0.0	0.0	0.0	0.0	0.0	0.0
Q9UPN7	22870	uniprot	H. sapiens	22870	H. sapiens	0.0	0.0	0.0	0.0	1.0	0.0	0.0	0.0	0.0	0.0	0.0	0.0	0.0	0.0	0.0	0.0	0.0	0.0	0.0	0.0
P41240	1445	uniprot	H. sapiens	1445	H. sapiens	0.0	0.0	0.0	0.0	0.0	1.0	0.0	0.0	1.0	0.0	0.0	0.0	0.0	1.0	0.0	0.0	0.0	0.0	0.0	0.0
Q6GMV2	10322	uniprot	H. sapiens	10322	H. sapiens	0.0	0.0	0.0	0.0	0.0	0.0	0.0	0.0	0.0	0.0	0.0	0.0	0.0	0.0	0.0	0.0	0.0	0.0	0.0	0.0
Q9H269	64601	uniprot	H. sapiens	64601	H. sapiens	0.0	1.0	0.0	0.0	0.0	0.0	0.0	0.0	0.0	0.0	0.0	0.0	0.0	0.0	0.0	0.0	0.0	0.0	0.0	0.0
P51570	2584	uniprot	H. sapiens	2584	H. sapiens	0.0	0.0	0.0	0.0	0.0	0.0	0.0	0.0	0.0	0.0	1.0	0.0	0.0	0.0	0.0	0.0	0.0	0.0	0.0	0.0
Q92609	9779	uniprot	H. sapiens	9779	H. sapiens	0.0	0.0	0.0	0.0	0.0	0.0	0.0	0.0	0.0	0.0	0.0	0.0	0.0	0.0	0.0	0.0	0.0	0.0	0.0	0.0
Q92544	9777	uniprot	H. sapiens	9777	H. sapiens	0.0	0.0	0.0	0.0	0.0	0.0	0.0	0.0	0.0	0.0	0.0	0.0	0.0	0.0	0.0	0.0	0.0	0.0	0.0	0.0
P46459	4905	uniprot	H. sapiens	4905	H. sapiens	0.0	0.0	0.0	0.0	1.0	0.0	0.0	0.0	0.0	0.0	0.0	0.0	0.0	0.0	0.0	0.0	0.0	0.0	0.0	0.0
Q13423	23530	uniprot	H. sapiens	23530	H. sapiens	0.0	0.0	0.0	0.0	0.0	0.0	0.0	0.0	0.0	0.0	0.0	1.0	0.0	0.0	1.0	0.0	0.0	0.0	0.0	0.0
Q9BZL4	54776	uniprot	H. sapiens	54776	H. sapiens	0.0	0.0	0.0	0.0	0.0	0.0	0.0	0.0	0.0	0.0	0.0	0.0	0.0	0.0	0.0	0.0	0.0	0.0	0.0	0.0
O15127	10066	uniprot	H. sapiens	10066	H. sapiens	0.0	0.0	0.0	0.0	0.0	0.0	0.0	0.0	0.0	0.0	0.0	0.0	0.0	0.0	0.0	0.0	0.0	0.0	0.0	0.0
P51688	6448	uniprot	H. sapiens	6448	H. sapiens	0.0	0.0	0.0	0.0	0.0	0.0	0.0	0.0	0.0	0.0	1.0	0.0	0.0	0.0	0.0	0.0	0.0	0.0	0.0	0.0
P23588	1975	uniprot	H. sapiens	1975	H. sapiens	1.0	1.0	0.0	0.0	0.0	0.0	0.0	0.0	0.0	0.0	0.0	0.0	0.0	0.0	0.0	0.0	0.0	0.0	0.0	0.0
Q9NR28	56616	uniprot	H. sapiens	56616	H. sapiens	0.0	0.0	0.0	0.0	0.0	0.0	0.0	0.0	0.0	0.0	0.0	0.0	0.0	0.0	0.0	0.0	0.0	0.0	0.0	0.0

## Sheet: Supplementary Table 1C
Supplementary table 1C. Enriched Reactome terms and functional clustering for 721 orthologous protein. This table lists all significantly enriched terms, their associated cluster group ID, and the representative term summarizing each functional cluster. Session id: tj4424bv9 (data: 25/06/2025)
GroupID	Category	Term	Description	LogP	Log(q-value)	Genes	Symbols	InTerm_InList
1_Summary	Reactome Gene Sets	R-HSA-8953854	Metabolism of RNA	-68.8634	-65.442	677,705,988,1477,1479,1660,1973,1975,2962,2963,3185,3188,3550,4236,4670,4686,5093,5356,5393,5438,5441,5683,5686,5690,5692,5694,5709,6130,6132,6133,6137,6143,6152,6155,6158,6188,6193,6202,6207,6208,6217,6227,6230,6235,6427,6428,6430,6431,6631,6632,6634,7311,8175,8570,8683,9130,9136,9238,9349,9410,9416,9688,10189,10212,10213,10285,10286,10291,10436,10482,10556,11260,11340,22826,23279,23481,23511,23…	ZFP36L1,BYSL,CDC5L,CSTF1,CSTF3,DHX9,EIF4A1,EIF4B,GTF2F1,GTF2F2,HNRNPF,HNRNPH2,IK,MFAP1,HNRNPM,NCBP1,PCBP1,PLRG1,EXOSC9,POLR2I,POLR2L,PSMA2,PSMA5,PSMB2,PSMB4,PSMB6,PSMD3,RPL7A,RPL8,RPL9,RPL13,RPL19,RPL24,RPL27,RPL28,RPS3,RPS5,RPS8,RPS13,RPS14,RPS16,RPS21,RPS25,RPS29,SRSF2,SRSF3,SRSF5,SRSF6,SNRPC,SNRPD1,SNRPD3,UBA52,SF3A2,KHSRP,SRSF9,FAM50A,RRP9,TBRG4,RPL23,SNRNP40,DDX23,NUP93,ALYREF,DDX39A,PSMD14,…	118/-
1_Member	Reactome Gene Sets	R-HSA-8953854	Metabolism of RNA	-68.8634	-65.442	677,705,988,1477,1479,1660,1973,1975,2962,2963,3185,3188,3550,4236,4670,4686,5093,5356,5393,5438,5441,5683,5686,5690,5692,5694,5709,6130,6132,6133,6137,6143,6152,6155,6158,6188,6193,6202,6207,6208,6217,6227,6230,6235,6427,6428,6430,6431,6631,6632,6634,7311,8175,8570,8683,9130,9136,9238,9349,9410,9416,9688,10189,10212,10213,10285,10286,10291,10436,10482,10556,11260,11340,22826,23279,23481,23511,23…	ZFP36L1,BYSL,CDC5L,CSTF1,CSTF3,DHX9,EIF4A1,EIF4B,GTF2F1,GTF2F2,HNRNPF,HNRNPH2,IK,MFAP1,HNRNPM,NCBP1,PCBP1,PLRG1,EXOSC9,POLR2I,POLR2L,PSMA2,PSMA5,PSMB2,PSMB4,PSMB6,PSMD3,RPL7A,RPL8,RPL9,RPL13,RPL19,RPL24,RPL27,RPL28,RPS3,RPS5,RPS8,RPS13,RPS14,RPS16,RPS21,RPS25,RPS29,SRSF2,SRSF3,SRSF5,SRSF6,SNRPC,SNRPD1,SNRPD3,UBA52,SF3A2,KHSRP,SRSF9,FAM50A,RRP9,TBRG4,RPL23,SNRNP40,DDX23,NUP93,ALYREF,DDX39A,PSMD14,…	118/644
1_Member	Reactome Gene Sets	R-HSA-72203	Processing of Capped Intron-Containing Pre-mRNA	-37.0425	-33.9221	988,1477,1479,1660,2962,2963,3185,3188,3550,4236,4670,4686,5093,5356,5438,5441,6427,6428,6430,6431,6631,6632,6634,8175,8683,9130,9410,9416,9688,10189,10212,10285,10286,10291,10482,22826,23279,23511,23636,27339,51340,51639,51645,55696,55749,56259,56339,56949,57721,58517,83443,84324,84991,85313,129401,348995	CDC5L,CSTF1,CSTF3,DHX9,GTF2F1,GTF2F2,HNRNPF,HNRNPH2,IK,MFAP1,HNRNPM,NCBP1,PCBP1,PLRG1,POLR2I,POLR2L,SRSF2,SRSF3,SRSF5,SRSF6,SNRPC,SNRPD1,SNRPD3,SF3A2,SRSF9,FAM50A,SNRNP40,DDX23,NUP93,ALYREF,DDX39A,SMNDC1,BCAS2,SF3A1,NXF1,DNAJC8,NUP160,NUP188,NUP62,PRPF19,CRNKL1,SF3B6,PPIL1,RBM22,CCAR1,CTNNBL1,METTL3,XAB2,METTL14,RBM25,SF3B5,SARNP,RBM17,PPIL4,NUP35,NUP43	56/252
1_Member	Reactome Gene Sets	R-HSA-72163	mRNA Splicing - Major Pathway	-29.4871	-26.6677	988,1660,2962,2963,3185,3188,3550,4236,4670,4686,5093,5356,5438,5441,6427,6428,6430,6431,6631,6632,6634,8175,8683,9130,9410,9416,10189,10285,10286,10291,22826,27339,51340,51639,51645,55696,55749,56259,56949,58517,83443,84991,85313	CDC5L,DHX9,GTF2F1,GTF2F2,HNRNPF,HNRNPH2,IK,MFAP1,HNRNPM,NCBP1,PCBP1,PLRG1,POLR2I,POLR2L,SRSF2,SRSF3,SRSF5,SRSF6,SNRPC,SNRPD1,SNRPD3,SF3A2,SRSF9,FAM50A,SNRNP40,DDX23,ALYREF,SMNDC1,BCAS2,SF3A1,DNAJC8,PRPF19,CRNKL1,SF3B6,PPIL1,RBM22,CCAR1,CTNNBL1,XAB2,RBM25,SF3B5,RBM17,PPIL4	43/184
1_Member	Reactome Gene Sets	R-HSA-72172	mRNA Splicing	-28.7647	-26.1214	988,1660,2962,2963,3185,3188,3550,4236,4670,4686,5093,5356,5438,5441,6427,6428,6430,6431,6631,6632,6634,8175,8683,9130,9410,9416,10189,10285,10286,10291,22826,27339,51340,51639,51645,55696,55749,56259,56949,58517,83443,84991,85313	CDC5L,DHX9,GTF2F1,GTF2F2,HNRNPF,HNRNPH2,IK,MFAP1,HNRNPM,NCBP1,PCBP1,PLRG1,POLR2I,POLR2L,SRSF2,SRSF3,SRSF5,SRSF6,SNRPC,SNRPD1,SNRPD3,SF3A2,SRSF9,FAM50A,SNRNP40,DDX23,ALYREF,SMNDC1,BCAS2,SF3A1,DNAJC8,PRPF19,CRNKL1,SF3B6,PPIL1,RBM22,CCAR1,CTNNBL1,XAB2,RBM25,SF3B5,RBM17,PPIL4	43/191
2_Summary	Reactome Gene Sets	R-HSA-9824446	Viral Infection Pathways	-34.4721	-31.5278	481,811,857,1025,1778,2288,2589,2931,2959,2960,2962,2963,3065,3326,3615,3836,4686,5438,5441,5589,5610,5683,5686,5690,5692,5694,5709,5869,5878,6130,6132,6133,6137,6143,6152,6155,6158,6188,6193,6202,6207,6208,6217,6227,6230,6235,6632,6634,6773,6827,6881,7311,7415,7532,7533,7706,8148,8517,8815,8841,9246,9349,9525,9688,9978,10134,10213,10383,10951,11198,23118,23279,23511,23636,25921,25929,27243,50628…	ATP1B1,CALR,CAV1,CDK9,DYNC1H1,FKBP4,GALNT1,GSK3A,GTF2B,GTF2E1,GTF2F1,GTF2F2,HDAC1,HSP90AB1,IMPDH2,KPNA1,NCBP1,POLR2I,POLR2L,PRKCSH,EIF2AK2,PSMA2,PSMA5,PSMB2,PSMB4,PSMB6,PSMD3,RAB5B,RAB5C,RPL7A,RPL8,RPL9,RPL13,RPL19,RPL24,RPL27,RPL28,RPS3,RPS5,RPS8,RPS13,RPS14,RPS16,RPS21,RPS25,RPS29,SNRPD1,SNRPD3,STAT2,SUPT4H1,TAF10,UBA52,VCP,YWHAG,YWHAH,TRIM25,TAF15,IKBKG,BANF1,HDAC3,UBE2L6,RPL23,VPS4B,NUP93,RBX…	185/-
2_Member	Reactome Gene Sets	R-HSA-9824446	Viral Infection Pathways	-34.4721	-31.5278	481,811,857,1025,1778,2288,2589,2931,2959,2960,2962,2963,3065,3326,3615,3836,4686,5438,5441,5589,5610,5683,5686,5690,5692,5694,5709,5869,5878,6130,6132,6133,6137,6143,6152,6155,6158,6188,6193,6202,6207,6208,6217,6227,6230,6235,6632,6634,6773,6827,6881,7311,7415,7532,7533,7706,8148,8517,8815,8841,9246,9349,9525,9688,9978,10134,10213,10383,10951,11198,23118,23279,23511,23636,25921,25929,27243,50628…	ATP1B1,CALR,CAV1,CDK9,DYNC1H1,FKBP4,GALNT1,GSK3A,GTF2B,GTF2E1,GTF2F1,GTF2F2,HDAC1,HSP90AB1,IMPDH2,KPNA1,NCBP1,POLR2I,POLR2L,PRKCSH,EIF2AK2,PSMA2,PSMA5,PSMB2,PSMB4,PSMB6,PSMD3,RAB5B,RAB5C,RPL7A,RPL8,RPL9,RPL13,RPL19,RPL24,RPL27,RPL28,RPS3,RPS5,RPS8,RPS13,RPS14,RPS16,RPS21,RPS25,RPS29,SNRPD1,SNRPD3,STAT2,SUPT4H1,TAF10,UBA52,VCP,YWHAG,YWHAH,TRIM25,TAF15,IKBKG,BANF1,HDAC3,UBE2L6,RPL23,VPS4B,NUP93,RBX…	84/692
2_Member	Reactome Gene Sets	R-HSA-72766	Translation	-29.3268	-26.6043	1965,1967,1973,1975,1978,3396,6130,6132,6133,6137,6143,6152,6155,6158,6182,6188,6193,6202,6207,6208,6217,6227,6230,6235,6729,6748,7311,7965,8661,8665,8666,8892,8893,9349,10102,10884,11222,26589,28957,29074,51069,51504,54460,55037,57129,64949,64969,64975,79590,90480,92935	EIF2S1,EIF2B1,EIF4A1,EIF4B,EIF4EBP1,MRPL58,RPL7A,RPL8,RPL9,RPL13,RPL19,RPL24,RPL27,RPL28,MRPL12,RPS3,RPS5,RPS8,RPS13,RPS14,RPS16,RPS21,RPS25,RPS29,SRP54,SSR4,UBA52,AIMP2,EIF3A,EIF3F,EIF3G,EIF2B2,EIF2B5,RPL23,TSFM,MRPS30,MRPL3,MRPL46,MRPS28,MRPL18,MRPL2,TRMT112,MRPS21,PTCD3,MRPL47,MRPS26,MRPS5,MRPL41,MRPL24,GADD45GIP1,MARS2	51/280
2_Member	Reactome Gene Sets	R-HSA-72312	rRNA processing	-27.9784	-25.4021	705,5393,6130,6132,6133,6137,6143,6152,6155,6158,6188,6193,6202,6207,6208,6217,6227,6230,6235,7311,9136,9349,10436,10556,11340,23481,25879,27043,28987,51010,51504,54512,55127,55178,55623,55759,57050,57418,79050,79707,84135,84946,117246	BYSL,EXOSC9,RPL7A,RPL8,RPL9,RPL13,RPL19,RPL24,RPL27,RPL28,RPS3,RPS5,RPS8,RPS13,RPS14,RPS16,RPS21,RPS25,RPS29,UBA52,RRP9,RPL23,EMG1,RPP30,EXOSC8,PES1,DCAF13,PELP1,NOB1,EXOSC3,TRMT112,EXOSC4,HEATR1,MRM3,THUMPD1,WDR12,UTP3,WDR18,NOC4L,NOL9,UTP15,LTV1,FTSJ3	43/199
2_Member	Reactome Gene Sets	R-HSA-8868773	rRNA processing in the nucleus and cytosol	-27.6646	-25.1463	705,5393,6130,6132,6133,6137,6143,6152,6155,6158,6188,6193,6202,6207,6208,6217,6227,6230,6235,7311,9136,9349,10436,10556,11340,23481,25879,27043,28987,51010,51504,54512,55127,55623,55759,57050,57418,79050,79707,84135,84946,117246	BYSL,EXOSC9,RPL7A,RPL8,RPL9,RPL13,RPL19,RPL24,RPL27,RPL28,RPS3,RPS5,RPS8,RPS13,RPS14,RPS16,RPS21,RPS25,RPS29,UBA52,RRP9,RPL23,EMG1,RPP30,EXOSC8,PES1,DCAF13,PELP1,NOB1,EXOSC3,TRMT112,EXOSC4,HEATR1,THUMPD1,WDR12,UTP3,WDR18,NOC4L,NOL9,UTP15,LTV1,FTSJ3	42/191
2_Member	Reactome Gene Sets	R-HSA-6791226	Major pathway of rRNA processing in the nucleolus and cytosol	-26.3601	-23.8929	705,5393,6130,6132,6133,6137,6143,6152,6155,6158,6188,6193,6202,6207,6208,6217,6227,6230,6235,7311,9136,9349,10436,10556,11340,23481,25879,27043,28987,51010,54512,55127,55759,57050,57418,79050,79707,84135,84946,117246	BYSL,EXOSC9,RPL7A,RPL8,RPL9,RPL13,RPL19,RPL24,RPL27,RPL28,RPS3,RPS5,RPS8,RPS13,RPS14,RPS16,RPS21,RPS25,RPS29,UBA52,RRP9,RPL23,EMG1,RPP30,EXOSC8,PES1,DCAF13,PELP1,NOB1,EXOSC3,EXOSC4,HEATR1,WDR12,UTP3,WDR18,NOC4L,NOL9,UTP15,LTV1,FTSJ3	40/182
2_Member	Reactome Gene Sets	R-HSA-2262752	Cellular responses to stress	-22.5708	-20.1494	37,318,811,1021,1778,1965,2288,2876,2931,3014,3163,3305,3309,3313,3326,4001,5393,5683,5686,5690,5692,5694,5709,6117,6118,6130,6132,6133,6137,6143,6152,6155,6158,6188,6193,6202,6207,6208,6217,6227,6230,6235,7184,7311,7415,8570,8841,9349,9531,9688,9973,9978,10111,10113,10213,10383,10393,10808,10954,11340,23279,23511,23636,51010,54512,55860,129401,348995	ACADVL,NUDT2,CALR,CDK6,DYNC1H1,EIF2S1,FKBP4,GPX1,GSK3A,H2AX,HMOX2,HSPA1L,HSPA5,HSPA9,HSP90AB1,LMNB1,EXOSC9,PSMA2,PSMA5,PSMB2,PSMB4,PSMB6,PSMD3,RPA1,RPA2,RPL7A,RPL8,RPL9,RPL13,RPL19,RPL24,RPL27,RPL28,RPS3,RPS5,RPS8,RPS13,RPS14,RPS16,RPS21,RPS25,RPS29,HSP90B1,UBA52,VCP,KHSRP,HDAC3,RPL23,BAG3,NUP93,CCS,RBX1,RAD50,PREB,PSMD14,TUBB4B,ANAPC10,HSPH1,PDIA5,EXOSC8,NUP160,NUP188,NUP62,EXOSC3,EXOSC4,ACTR10,…	68/690
2_Member	Reactome Gene Sets	R-HSA-72613	Eukaryotic Translation Initiation	-21.0669	-18.7528	1965,1967,1973,1975,1978,6130,6132,6133,6137,6143,6152,6155,6158,6188,6193,6202,6207,6208,6217,6227,6230,6235,7311,8661,8665,8666,8892,8893,9349	EIF2S1,EIF2B1,EIF4A1,EIF4B,EIF4EBP1,RPL7A,RPL8,RPL9,RPL13,RPL19,RPL24,RPL27,RPL28,RPS3,RPS5,RPS8,RPS13,RPS14,RPS16,RPS21,RPS25,RPS29,UBA52,EIF3A,EIF3F,EIF3G,EIF2B2,EIF2B5,RPL23	29/115
2_Member	Reactome Gene Sets	R-HSA-72737	Cap-dependent Translation Initiation	-21.0669	-18.7528	1965,1967,1973,1975,1978,6130,6132,6133,6137,6143,6152,6155,6158,6188,6193,6202,6207,6208,6217,6227,6230,6235,7311,8661,8665,8666,8892,8893,9349	EIF2S1,EIF2B1,EIF4A1,EIF4B,EIF4EBP1,RPL7A,RPL8,RPL9,RPL13,RPL19,RPL24,RPL27,RPL28,RPS3,RPS5,RPS8,RPS13,RPS14,RPS16,RPS21,RPS25,RPS29,UBA52,EIF3A,EIF3F,EIF3G,EIF2B2,EIF2B5,RPL23	29/115
2_Member	Reactome Gene Sets	R-HSA-168255	Influenza Infection	-21.0603	-18.7528	811,2962,2963,3836,5438,5441,5610,6130,6132,6133,6137,6143,6152,6155,6158,6188,6193,6202,6207,6208,6217,6227,6230,6235,7311,9349,9688,23279,23511,23636,129401,348995	CALR,GTF2F1,GTF2F2,KPNA1,POLR2I,POLR2L,EIF2AK2,RPL7A,RPL8,RPL9,RPL13,RPL19,RPL24,RPL27,RPL28,RPS3,RPS5,RPS8,RPS13,RPS14,RPS16,RPS21,RPS25,RPS29,UBA52,RPL23,NUP93,NUP160,NUP188,NUP62,NUP35,NUP43	32/147
2_Member	Reactome Gene Sets	R-HSA-8953897	Cellular responses to stimuli	-20.6569	-18.3816	37,318,811,1021,1778,1965,2288,2876,2931,3014,3163,3305,3309,3313,3326,4001,4323,5393,5683,5686,5690,5692,5694,5709,6117,6118,6130,6132,6133,6137,6143,6152,6155,6158,6188,6193,6202,6207,6208,6217,6227,6230,6235,7184,7311,7415,8517,8570,8841,9349,9531,9688,9973,9978,10111,10113,10213,10383,10393,10808,10954,11340,23279,23511,23636,51010,54512,55860,129401,348995	ACADVL,NUDT2,CALR,CDK6,DYNC1H1,EIF2S1,FKBP4,GPX1,GSK3A,H2AX,HMOX2,HSPA1L,HSPA5,HSPA9,HSP90AB1,LMNB1,MMP14,EXOSC9,PSMA2,PSMA5,PSMB2,PSMB4,PSMB6,PSMD3,RPA1,RPA2,RPL7A,RPL8,RPL9,RPL13,RPL19,RPL24,RPL27,RPL28,RPS3,RPS5,RPS8,RPS13,RPS14,RPS16,RPS21,RPS25,RPS29,HSP90B1,UBA52,VCP,IKBKG,KHSRP,HDAC3,RPL23,BAG3,NUP93,CCS,RBX1,RAD50,PREB,PSMD14,TUBB4B,ANAPC10,HSPH1,PDIA5,EXOSC8,NUP160,NUP188,NUP62,EXOSC3,EX…	70/788
2_Member	Reactome Gene Sets	R-HSA-168273	Influenza Viral RNA Transcription and Replication	-19.3585	-17.1131	2962,2963,5438,5441,6130,6132,6133,6137,6143,6152,6155,6158,6188,6193,6202,6207,6208,6217,6227,6230,6235,7311,9349,9688,23279,23511,23636,129401,348995	GTF2F1,GTF2F2,POLR2I,POLR2L,RPL7A,RPL8,RPL9,RPL13,RPL19,RPL24,RPL27,RPL28,RPS3,RPS5,RPS8,RPS13,RPS14,RPS16,RPS21,RPS25,RPS29,UBA52,RPL23,NUP93,NUP160,NUP188,NUP62,NUP35,NUP43	29/131
2_Member	Reactome Gene Sets	R-HSA-9694516	SARS-CoV-2 Infection	-17.7465	-15.5555	857,2589,2931,3326,5589,6188,6193,6202,6207,6208,6217,6227,6230,6235,6632,6634,6773,7311,7415,7532,7533,7706,8517,9688,23118,23279,23511,23636,25921,25929,27243,50628,64601,65082,128866,129401,348995	CAV1,GALNT1,GSK3A,HSP90AB1,PRKCSH,RPS3,RPS5,RPS8,RPS13,RPS14,RPS16,RPS21,RPS25,RPS29,SNRPD1,SNRPD3,STAT2,UBA52,VCP,YWHAG,YWHAH,TRIM25,IKBKG,NUP93,TAB2,NUP160,NUP188,NUP62,ZDHHC5,GEMIN5,CHMP2A,GEMIN4,VPS16,VPS33A,CHMP4B,NUP35,NUP43	37/258
2_Member	Reactome Gene Sets	R-HSA-9679506	SARS-CoV Infections	-17.6106	-15.4444	481,857,2288,2589,2931,3065,3326,3615,5589,6188,6193,6202,6207,6208,6217,6227,6230,6235,6632,6634,6773,7311,7415,7532,7533,7706,8517,9688,9978,23118,23279,23511,23636,25921,25929,27243,50628,64601,65082,128866,129401,348995	ATP1B1,CAV1,FKBP4,GALNT1,GSK3A,HDAC1,HSP90AB1,IMPDH2,PRKCSH,RPS3,RPS5,RPS8,RPS13,RPS14,RPS16,RPS21,RPS25,RPS29,SNRPD1,SNRPD3,STAT2,UBA52,VCP,YWHAG,YWHAH,TRIM25,IKBKG,NUP93,RBX1,TAB2,NUP160,NUP188,NUP62,ZDHHC5,GEMIN5,CHMP2A,GEMIN4,VPS16,VPS33A,CHMP4B,NUP35,NUP43	42/340
2_Member	Reactome Gene Sets	R-HSA-156827	L13a-mediated translational silencing of Ceruloplasmin expression	-17.3784	-15.2767	1965,1973,1975,6130,6132,6133,6137,6143,6152,6155,6158,6188,6193,6202,6207,6208,6217,6227,6230,6235,7311,8661,8665,8666,9349	EIF2S1,EIF4A1,EIF4B,RPL7A,RPL8,RPL9,RPL13,RPL19,RPL24,RPL27,RPL28,RPS3,RPS5,RPS8,RPS13,RPS14,RPS16,RPS21,RPS25,RPS29,UBA52,EIF3A,EIF3F,EIF3G,RPL23	25/107
2_Member	Reactome Gene Sets	R-HSA-9010553	Regulation of expression of SLITs and ROBOs	-17.3759	-15.2767	4686,5683,5686,5690,5692,5694,5709,6130,6132,6133,6137,6143,6152,6155,6158,6188,6193,6202,6207,6208,6217,6227,6230,6235,7311,9349,9978,10213	NCBP1,PSMA2,PSMA5,PSMB2,PSMB4,PSMB6,PSMD3,RPL7A,RPL8,RPL9,RPL13,RPL19,RPL24,RPL27,RPL28,RPS3,RPS5,RPS8,RPS13,RPS14,RPS16,RPS21,RPS25,RPS29,UBA52,RPL23,RBX1,PSMD14	28/141
2_Member	Reactome Gene Sets	R-HSA-72706	GTP hydrolysis and joining of the 60S ribosomal subunit	-17.2737	-15.1947	1965,1973,1975,6130,6132,6133,6137,6143,6152,6155,6158,6188,6193,6202,6207,6208,6217,6227,6230,6235,7311,8661,8665,8666,9349	EIF2S1,EIF4A1,EIF4B,RPL7A,RPL8,RPL9,RPL13,RPL19,RPL24,RPL27,RPL28,RPS3,RPS5,RPS8,RPS13,RPS14,RPS16,RPS21,RPS25,RPS29,UBA52,EIF3A,EIF3F,EIF3G,RPL23	25/108
2_Member	Reactome Gene Sets	R-HSA-9705683	SARS-CoV-2-host interactions	-16.6222	-14.5625	857,3326,6188,6193,6202,6207,6208,6217,6227,6230,6235,6632,6634,6773,7311,7532,7533,7706,8517,9688,23118,23279,23511,23636,25929,50628,64601,65082,129401,348995	CAV1,HSP90AB1,RPS3,RPS5,RPS8,RPS13,RPS14,RPS16,RPS21,RPS25,RPS29,SNRPD1,SNRPD3,STAT2,UBA52,YWHAG,YWHAH,TRIM25,IKBKG,NUP93,TAB2,NUP160,NUP188,NUP62,GEMIN5,GEMIN4,VPS16,VPS33A,NUP35,NUP43	30/176
2_Member	Reactome Gene Sets	R-HSA-376176	Signaling by ROBO receptors	-15.6117	-13.6052	4686,5216,5683,5686,5690,5692,5694,5709,6130,6132,6133,6137,6143,6152,6155,6158,6188,6193,6202,6207,6208,6217,6227,6230,6235,7311,9349,9978,10213	NCBP1,PFN1,PSMA2,PSMA5,PSMB2,PSMB4,PSMB6,PSMD3,RPL7A,RPL8,RPL9,RPL13,RPL19,RPL24,RPL27,RPL28,RPS3,RPS5,RPS8,RPS13,RPS14,RPS16,RPS21,RPS25,RPS29,UBA52,RPL23,RBX1,PSMD14	29/177
2_Member	Reactome Gene Sets	R-HSA-71291	Metabolism of amino acids and derivatives	-15.465	-13.4749	36,1468,1629,2752,5092,5683,5686,5690,5692,5694,5709,5832,6130,6132,6133,6137,6143,6152,6155,6158,6188,6193,6202,6207,6208,6217,6227,6230,6235,6723,7311,7965,9061,9349,9380,10213,23474,56922,84890	ACADSB,SLC25A10,DBT,GLUL,PCBD1,PSMA2,PSMA5,PSMB2,PSMB4,PSMB6,PSMD3,ALDH18A1,RPL7A,RPL8,RPL9,RPL13,RPL19,RPL24,RPL27,RPL28,RPS3,RPS5,RPS8,RPS13,RPS14,RPS16,RPS21,RPS25,RPS29,SRM,UBA52,AIMP2,PAPSS1,RPL23,GRHPR,PSMD14,ETHE1,MCCC1,ADO	39/336
2_Member	Reactome Gene Sets	R-HSA-72689	Formation of a pool of free 40S subunits	-14.6807	-12.7506	6130,6132,6133,6137,6143,6152,6155,6158,6188,6193,6202,6207,6208,6217,6227,6230,6235,7311,8661,8665,8666,9349	RPL7A,RPL8,RPL9,RPL13,RPL19,RPL24,RPL27,RPL28,RPS3,RPS5,RPS8,RPS13,RPS14,RPS16,RPS21,RPS25,RPS29,UBA52,EIF3A,EIF3F,EIF3G,RPL23	22/101
2_Member	Reactome Gene Sets	R-HSA-975956	Nonsense Mediated Decay (NMD) independent of the Exon Junction Complex (EJC)	-13.3873	-11.4844	4686,6130,6132,6133,6137,6143,6152,6155,6158,6188,6193,6202,6207,6208,6217,6227,6230,6235,7311,9349	NCBP1,RPL7A,RPL8,RPL9,RPL13,RPL19,RPL24,RPL27,RPL28,RPS3,RPS5,RPS8,RPS13,RPS14,RPS16,RPS21,RPS25,RPS29,UBA52,RPL23	20/92
2_Member	Reactome Gene Sets	R-HSA-72764	Eukaryotic Translation Termination	-13.2918	-11.4018	6130,6132,6133,6137,6143,6152,6155,6158,6188,6193,6202,6207,6208,6217,6227,6230,6235,7311,9349,51504	RPL7A,RPL8,RPL9,RPL13,RPL19,RPL24,RPL27,RPL28,RPS3,RPS5,RPS8,RPS13,RPS14,RPS16,RPS21,RPS25,RPS29,UBA52,RPL23,TRMT112	20/93
2_Member	Reactome Gene Sets	R-HSA-72662	Activation of the mRNA upon binding of the cap-binding complex and eIFs, and subsequent binding to 43S	-12.8362	-10.983	1965,1973,1975,1978,6188,6193,6202,6207,6208,6217,6227,6230,6235,8661,8665,8666	EIF2S1,EIF4A1,EIF4B,EIF4EBP1,RPS3,RPS5,RPS8,RPS13,RPS14,RPS16,RPS21,RPS25,RPS29,EIF3A,EIF3F,EIF3G	16/56
2_Member	Reactome Gene Sets	R-HSA-422475	Axon guidance	-12.7481	-10.9138	214,3326,3897,3912,3915,4628,4686,5216,5306,5604,5683,5686,5690,5692,5694,5709,6130,6132,6133,6137,6143,6152,6155,6158,6188,6193,6202,6207,6208,6217,6227,6230,6235,7311,9349,9978,10097,10213,10383,10552,23385	ALCAM,HSP90AB1,L1CAM,LAMB1,LAMC1,MYH10,NCBP1,PFN1,PITPNA,MAP2K1,PSMA2,PSMA5,PSMB2,PSMB4,PSMB6,PSMD3,RPL7A,RPL8,RPL9,RPL13,RPL19,RPL24,RPL27,RPL28,RPS3,RPS5,RPS8,RPS13,RPS14,RPS16,RPS21,RPS25,RPS29,UBA52,RPL23,RBX1,ACTR2,PSMD14,TUBB4B,ARPC1A,NCSTN	41/446
2_Member	Reactome Gene Sets	R-HSA-9633012	Response of EIF2AK4 (GCN2) to amino acid deficiency	-12.7441	-10.9138	1965,6130,6132,6133,6137,6143,6152,6155,6158,6188,6193,6202,6207,6208,6217,6227,6230,6235,7311,9349	EIF2S1,RPL7A,RPL8,RPL9,RPL13,RPL19,RPL24,RPL27,RPL28,RPS3,RPS5,RPS8,RPS13,RPS14,RPS16,RPS21,RPS25,RPS29,UBA52,RPL23	20/99
2_Member	Reactome Gene Sets	R-HSA-1799339	SRP-dependent cotranslational protein targeting to membrane	-12.6738	-10.8544	6130,6132,6133,6137,6143,6152,6155,6158,6188,6193,6202,6207,6208,6217,6227,6230,6235,6729,6748,7311,9349	RPL7A,RPL8,RPL9,RPL13,RPL19,RPL24,RPL27,RPL28,RPS3,RPS5,RPS8,RPS13,RPS14,RPS16,RPS21,RPS25,RPS29,SRP54,SSR4,UBA52,RPL23	21/112
2_Member	Reactome Gene Sets	R-HSA-156902	Peptide chain elongation	-12.5982	-10.8	6130,6132,6133,6137,6143,6152,6155,6158,6188,6193,6202,6207,6208,6217,6227,6230,6235,7311,9349	RPL7A,RPL8,RPL9,RPL13,RPL19,RPL24,RPL27,RPL28,RPS3,RPS5,RPS8,RPS13,RPS14,RPS16,RPS21,RPS25,RPS29,UBA52,RPL23	19/89
2_Member	Reactome Gene Sets	R-HSA-192823	Viral mRNA Translation	-12.5982	-10.8	6130,6132,6133,6137,6143,6152,6155,6158,6188,6193,6202,6207,6208,6217,6227,6230,6235,7311,9349	RPL7A,RPL8,RPL9,RPL13,RPL19,RPL24,RPL27,RPL28,RPS3,RPS5,RPS8,RPS13,RPS14,RPS16,RPS21,RPS25,RPS29,UBA52,RPL23	19/89
2_Member	Reactome Gene Sets	R-HSA-2408522	Selenoamino acid metabolism	-12.5154	-10.7274	6130,6132,6133,6137,6143,6152,6155,6158,6188,6193,6202,6207,6208,6217,6227,6230,6235,7311,7965,9061,9349	RPL7A,RPL8,RPL9,RPL13,RPL19,RPL24,RPL27,RPL28,RPS3,RPS5,RPS8,RPS13,RPS14,RPS16,RPS21,RPS25,RPS29,UBA52,AIMP2,PAPSS1,RPL23	21/114
2_Member	Reactome Gene Sets	R-HSA-156842	Eukaryotic Translation Elongation	-12.4127	-10.6445	6130,6132,6133,6137,6143,6152,6155,6158,6188,6193,6202,6207,6208,6217,6227,6230,6235,7311,9349	RPL7A,RPL8,RPL9,RPL13,RPL19,RPL24,RPL27,RPL28,RPS3,RPS5,RPS8,RPS13,RPS14,RPS16,RPS21,RPS25,RPS29,UBA52,RPL23	19/91
2_Member	Reactome Gene Sets	R-HSA-2408557	Selenocysteine synthesis	-12.2322	-10.4735	6130,6132,6133,6137,6143,6152,6155,6158,6188,6193,6202,6207,6208,6217,6227,6230,6235,7311,9349	RPL7A,RPL8,RPL9,RPL13,RPL19,RPL24,RPL27,RPL28,RPS3,RPS5,RPS8,RPS13,RPS14,RPS16,RPS21,RPS25,RPS29,UBA52,RPL23	19/93
2_Member	Reactome Gene Sets	R-HSA-9675108	Nervous system development	-12.0935	-10.3533	214,3326,3897,3912,3915,4628,4686,5216,5306,5604,5683,5686,5690,5692,5694,5709,6130,6132,6133,6137,6143,6152,6155,6158,6188,6193,6202,6207,6208,6217,6227,6230,6235,7311,9349,9978,10097,10213,10383,10552,23385	ALCAM,HSP90AB1,L1CAM,LAMB1,LAMC1,MYH10,NCBP1,PFN1,PITPNA,MAP2K1,PSMA2,PSMA5,PSMB2,PSMB4,PSMB6,PSMD3,RPL7A,RPL8,RPL9,RPL13,RPL19,RPL24,RPL27,RPL28,RPS3,RPS5,RPS8,RPS13,RPS14,RPS16,RPS21,RPS25,RPS29,UBA52,RPL23,RBX1,ACTR2,PSMD14,TUBB4B,ARPC1A,NCSTN	41/467
2_Member	Reactome Gene Sets	R-HSA-927802	Nonsense-Mediated Decay (NMD)	-12.0747	-10.3522	4686,6130,6132,6133,6137,6143,6152,6155,6158,6188,6193,6202,6207,6208,6217,6227,6230,6235,7311,9349	NCBP1,RPL7A,RPL8,RPL9,RPL13,RPL19,RPL24,RPL27,RPL28,RPS3,RPS5,RPS8,RPS13,RPS14,RPS16,RPS21,RPS25,RPS29,UBA52,RPL23	20/107
2_Member	Reactome Gene Sets	R-HSA-975957	Nonsense Mediated Decay (NMD) enhanced by the Exon Junction Complex (EJC)	-12.0747	-10.3522	4686,6130,6132,6133,6137,6143,6152,6155,6158,6188,6193,6202,6207,6208,6217,6227,6230,6235,7311,9349	NCBP1,RPL7A,RPL8,RPL9,RPL13,RPL19,RPL24,RPL27,RPL28,RPS3,RPS5,RPS8,RPS13,RPS14,RPS16,RPS21,RPS25,RPS29,UBA52,RPL23	20/107
2_Member	Reactome Gene Sets	R-HSA-72649	Translation initiation complex formation	-11.7452	-10.0562	1965,1973,1975,6188,6193,6202,6207,6208,6217,6227,6230,6235,8661,8665,8666	EIF2S1,EIF4A1,EIF4B,RPS3,RPS5,RPS8,RPS13,RPS14,RPS16,RPS21,RPS25,RPS29,EIF3A,EIF3F,EIF3G	15/55
2_Member	Reactome Gene Sets	R-HSA-72702	Ribosomal scanning and start codon recognition	-11.7452	-10.0562	1965,1973,1975,6188,6193,6202,6207,6208,6217,6227,6230,6235,8661,8665,8666	EIF2S1,EIF4A1,EIF4B,RPS3,RPS5,RPS8,RPS13,RPS14,RPS16,RPS21,RPS25,RPS29,EIF3A,EIF3F,EIF3G	15/55
2_Member	Reactome Gene Sets	R-HSA-9678108	SARS-CoV-1 Infection	-11.2491	-9.62003	857,2589,2931,5589,6188,6193,6202,6207,6208,6217,6227,6230,6235,7311,7415,7532,7533,7706,27243,128866	CAV1,GALNT1,GSK3A,PRKCSH,RPS3,RPS5,RPS8,RPS13,RPS14,RPS16,RPS21,RPS25,RPS29,UBA52,VCP,YWHAG,YWHAH,TRIM25,CHMP2A,CHMP4B	20/118
2_Member	Reactome Gene Sets	R-HSA-9754678	SARS-CoV-2 modulates host translation machinery	-10.2189	-8.65377	6188,6193,6202,6207,6208,6217,6227,6230,6235,6632,6634,25929,50628	RPS3,RPS5,RPS8,RPS13,RPS14,RPS16,RPS21,RPS25,RPS29,SNRPD1,SNRPD3,GEMIN5,GEMIN4	13/48
2_Member	Reactome Gene Sets	R-HSA-72695	Formation of the ternary complex, and subsequently, the 43S complex	-9.7394	-8.21006	1965,6188,6193,6202,6207,6208,6217,6227,6230,6235,8661,8665,8666	EIF2S1,RPS3,RPS5,RPS8,RPS13,RPS14,RPS16,RPS21,RPS25,RPS29,EIF3A,EIF3F,EIF3G	13/52
2_Member	Reactome Gene Sets	R-HSA-9711097	Cellular response to starvation	-9.46588	-7.95826	1965,6130,6132,6133,6137,6143,6152,6155,6158,6188,6193,6202,6207,6208,6217,6227,6230,6235,7311,9349	EIF2S1,RPL7A,RPL8,RPL9,RPL13,RPL19,RPL24,RPL27,RPL28,RPS3,RPS5,RPS8,RPS13,RPS14,RPS16,RPS21,RPS25,RPS29,UBA52,RPL23	20/147
2_Member	Reactome Gene Sets	R-HSA-9692914	SARS-CoV-1-host interactions	-8.32847	-6.8938	857,6188,6193,6202,6207,6208,6217,6227,6230,6235,7311,7532,7533,7706	CAV1,RPS3,RPS5,RPS8,RPS13,RPS14,RPS16,RPS21,RPS25,RPS29,UBA52,YWHAG,YWHAH,TRIM25	14/79
2_Member	Reactome Gene Sets	R-HSA-9735869	SARS-CoV-1 modulates host translation machinery	-6.92251	-5.62492	6188,6193,6202,6207,6208,6217,6227,6230,6235	RPS3,RPS5,RPS8,RPS13,RPS14,RPS16,RPS21,RPS25,RPS29	9/36
3_Summary	Reactome Gene Sets	R-HSA-162906	HIV Infection	-18.7153	-16.498	1025,2959,2960,2962,2963,3836,4686,5438,5441,5683,5686,5690,5692,5694,5709,6827,6881,7311,8148,8815,9525,9688,9978,10213,11198,23279,23511,23636,27243,128866,129401,348995,6427,6431,6632,6634,9410,9416,51639,83443,9646,23168,55756,58490,3185,4670,8621,2288,3014,3065,3326,5885,857,2773,8841	CDK9,GTF2B,GTF2E1,GTF2F1,GTF2F2,KPNA1,NCBP1,POLR2I,POLR2L,PSMA2,PSMA5,PSMB2,PSMB4,PSMB6,PSMD3,SUPT4H1,TAF10,UBA52,TAF15,BANF1,VPS4B,NUP93,RBX1,PSMD14,SUPT16H,NUP160,NUP188,NUP62,CHMP2A,CHMP4B,NUP35,NUP43,SRSF2,SRSF6,SNRPD1,SNRPD3,SNRNP40,DDX23,SF3B6,SF3B5,CTR9,RTF1,INTS9,RPRD1B,HNRNPF,HNRNPM,CDK13,FKBP4,H2AX,HDAC1,HSP90AB1,RAD21,CAV1,GNAI3,HDAC3	55/-
3_Member	Reactome Gene Sets	R-HSA-162906	HIV Infection	-18.7153	-16.498	1025,2959,2960,2962,2963,3836,4686,5438,5441,5683,5686,5690,5692,5694,5709,6827,6881,7311,8148,8815,9525,9688,9978,10213,11198,23279,23511,23636,27243,128866,129401,348995	CDK9,GTF2B,GTF2E1,GTF2F1,GTF2F2,KPNA1,NCBP1,POLR2I,POLR2L,PSMA2,PSMA5,PSMB2,PSMB4,PSMB6,PSMD3,SUPT4H1,TAF10,UBA52,TAF15,BANF1,VPS4B,NUP93,RBX1,PSMD14,SUPT16H,NUP160,NUP188,NUP62,CHMP2A,CHMP4B,NUP35,NUP43	32/174
3_Member	Reactome Gene Sets	R-HSA-162587	HIV Life Cycle	-14.3915	-12.4752	1025,2959,2960,2962,2963,3836,4686,5438,5441,6827,6881,7311,8148,8815,9525,9688,11198,23279,23511,23636,27243,128866,129401,348995	CDK9,GTF2B,GTF2E1,GTF2F1,GTF2F2,KPNA1,NCBP1,POLR2I,POLR2L,SUPT4H1,TAF10,UBA52,TAF15,BANF1,VPS4B,NUP93,SUPT16H,NUP160,NUP188,NUP62,CHMP2A,CHMP4B,NUP35,NUP43	24/128
3_Member	Reactome Gene Sets	R-HSA-162599	Late Phase of HIV Life Cycle	-13.273	-11.3957	1025,2959,2960,2962,2963,4686,5438,5441,6827,6881,7311,8148,9525,9688,11198,23279,23511,23636,27243,128866,129401,348995	CDK9,GTF2B,GTF2E1,GTF2F1,GTF2F2,NCBP1,POLR2I,POLR2L,SUPT4H1,TAF10,UBA52,TAF15,VPS4B,NUP93,SUPT16H,NUP160,NUP188,NUP62,CHMP2A,CHMP4B,NUP35,NUP43	22/117
3_Member	Reactome Gene Sets	R-HSA-72165	mRNA Splicing - Minor Pathway	-10.4778	-8.8759	2962,2963,4686,5438,5441,6427,6431,6632,6634,9410,9416,51639,83443	GTF2F1,GTF2F2,NCBP1,POLR2I,POLR2L,SRSF2,SRSF6,SNRPD1,SNRPD3,SNRNP40,DDX23,SF3B6,SF3B5	13/46
3_Member	Reactome Gene Sets	R-HSA-674695	RNA Polymerase II Pre-transcription Events	-8.79856	-7.33137	1025,2959,2960,2962,2963,4686,5438,5441,6827,6881,8148,9646,11198,23168	CDK9,GTF2B,GTF2E1,GTF2F1,GTF2F2,NCBP1,POLR2I,POLR2L,SUPT4H1,TAF10,TAF15,CTR9,SUPT16H,RTF1	14/73
3_Member	Reactome Gene Sets	R-HSA-167172	Transcription of the HIV genome	-7.59473	-6.21861	1025,2959,2960,2962,2963,4686,5438,5441,6827,6881,8148,11198	CDK9,GTF2B,GTF2E1,GTF2F1,GTF2F2,NCBP1,POLR2I,POLR2L,SUPT4H1,TAF10,TAF15,SUPT16H	12/63
3_Member	Reactome Gene Sets	R-HSA-112382	Formation of RNA Pol II elongation complex	-6.63806	-5.38098	1025,2962,2963,4686,5438,5441,6827,9646,11198,23168	CDK9,GTF2F1,GTF2F2,NCBP1,POLR2I,POLR2L,SUPT4H1,CTR9,SUPT16H,RTF1	10/50
3_Member	Reactome Gene Sets	R-HSA-75955	RNA Polymerase II Transcription Elongation	-6.63806	-5.38098	1025,2962,2963,4686,5438,5441,6827,9646,11198,23168	CDK9,GTF2F1,GTF2F2,NCBP1,POLR2I,POLR2L,SUPT4H1,CTR9,SUPT16H,RTF1	10/50
3_Member	Reactome Gene Sets	R-HSA-6807505	RNA polymerase II transcribes snRNA genes	-6.53368	-5.29693	1025,2959,2960,2962,2963,4686,5438,5441,6827,55756,58490	CDK9,GTF2B,GTF2E1,GTF2F1,GTF2F2,NCBP1,POLR2I,POLR2L,SUPT4H1,INTS9,RPRD1B	11/64
3_Member	Reactome Gene Sets	R-HSA-6803529	FGFR2 alternative splicing	-6.44853	-5.21743	2962,2963,3185,4670,4686,5438,5441	GTF2F1,GTF2F2,HNRNPF,HNRNPM,NCBP1,POLR2I,POLR2L	7/21
3_Member	Reactome Gene Sets	R-HSA-167238	Pausing and recovery of Tat-mediated HIV elongation	-5.61943	-4.50334	1025,2962,2963,5438,5441,6827,11198	CDK9,GTF2F1,GTF2F2,POLR2I,POLR2L,SUPT4H1,SUPT16H	7/27
3_Member	Reactome Gene Sets	R-HSA-167243	Tat-mediated HIV elongation arrest and recovery	-5.61943	-4.50334	1025,2962,2963,5438,5441,6827,11198	CDK9,GTF2F1,GTF2F2,POLR2I,POLR2L,SUPT4H1,SUPT16H	7/27
3_Member	Reactome Gene Sets	R-HSA-167287	HIV elongation arrest and recovery	-5.61943	-4.50334	1025,2962,2963,5438,5441,6827,11198	CDK9,GTF2F1,GTF2F2,POLR2I,POLR2L,SUPT4H1,SUPT16H	7/27
3_Member	Reactome Gene Sets	R-HSA-167290	Pausing and recovery of HIV elongation	-5.61943	-4.50334	1025,2962,2963,5438,5441,6827,11198	CDK9,GTF2F1,GTF2F2,POLR2I,POLR2L,SUPT4H1,SUPT16H	7/27
3_Member	Reactome Gene Sets	R-HSA-167152	Formation of HIV elongation complex in the absence of HIV Tat	-5.60144	-4.49567	1025,2962,2963,4686,5438,5441,6827,11198	CDK9,GTF2F1,GTF2F2,NCBP1,POLR2I,POLR2L,SUPT4H1,SUPT16H	8/38
3_Member	Reactome Gene Sets	R-HSA-167169	HIV Transcription Elongation	-5.60144	-4.49567	1025,2962,2963,4686,5438,5441,6827,11198	CDK9,GTF2F1,GTF2F2,NCBP1,POLR2I,POLR2L,SUPT4H1,SUPT16H	8/38
3_Member	Reactome Gene Sets	R-HSA-167200	Formation of HIV-1 elongation complex containing HIV-1 Tat	-5.60144	-4.49567	1025,2962,2963,4686,5438,5441,6827,11198	CDK9,GTF2F1,GTF2F2,NCBP1,POLR2I,POLR2L,SUPT4H1,SUPT16H	8/38
3_Member	Reactome Gene Sets	R-HSA-167246	Tat-mediated elongation of the HIV-1 transcript	-5.60144	-4.49567	1025,2962,2963,4686,5438,5441,6827,11198	CDK9,GTF2F1,GTF2F2,NCBP1,POLR2I,POLR2L,SUPT4H1,SUPT16H	8/38
3_Member	Reactome Gene Sets	R-HSA-167242	Abortive elongation of HIV-1 transcript in the absence of Tat	-5.2945	-4.231	2962,2963,4686,5438,5441,6827	GTF2F1,GTF2F2,NCBP1,POLR2I,POLR2L,SUPT4H1	6/20
3_Member	Reactome Gene Sets	R-HSA-167161	HIV Transcription Initiation	-4.87484	-3.8667	2959,2960,2962,2963,5438,5441,6881,8148	GTF2B,GTF2E1,GTF2F1,GTF2F2,POLR2I,POLR2L,TAF10,TAF15	8/47
3_Member	Reactome Gene Sets	R-HSA-167162	RNA Polymerase II HIV Promoter Escape	-4.87484	-3.8667	2959,2960,2962,2963,5438,5441,6881,8148	GTF2B,GTF2E1,GTF2F1,GTF2F2,POLR2I,POLR2L,TAF10,TAF15	8/47
3_Member	Reactome Gene Sets	R-HSA-73776	RNA Polymerase II Promoter Escape	-4.87484	-3.8667	2959,2960,2962,2963,5438,5441,6881,8148	GTF2B,GTF2E1,GTF2F1,GTF2F2,POLR2I,POLR2L,TAF10,TAF15	8/47
3_Member	Reactome Gene Sets	R-HSA-73779	RNA Polymerase II Transcription Pre-Initiation And Promoter Opening	-4.87484	-3.8667	2959,2960,2962,2963,5438,5441,6881,8148	GTF2B,GTF2E1,GTF2F1,GTF2F2,POLR2I,POLR2L,TAF10,TAF15	8/47
3_Member	Reactome Gene Sets	R-HSA-75953	RNA Polymerase II Transcription Initiation	-4.87484	-3.8667	2959,2960,2962,2963,5438,5441,6881,8148	GTF2B,GTF2E1,GTF2F1,GTF2F2,POLR2I,POLR2L,TAF10,TAF15	8/47
3_Member	Reactome Gene Sets	R-HSA-76042	RNA Polymerase II Transcription Initiation And Promoter Clearance	-4.87484	-3.8667	2959,2960,2962,2963,5438,5441,6881,8148	GTF2B,GTF2E1,GTF2F1,GTF2F2,POLR2I,POLR2L,TAF10,TAF15	8/47
3_Member	Reactome Gene Sets	R-HSA-8851708	Signaling by FGFR2 IIIa TM	-4.44278	-3.47313	2962,2963,4686,5438,5441	GTF2F1,GTF2F2,NCBP1,POLR2I,POLR2L	5/17
3_Member	Reactome Gene Sets	R-HSA-6796648	TP53 Regulates Transcription of DNA Repair Genes	-4.41852	-3.45192	1025,2962,2963,5438,5441,6827,8621,11198	CDK9,GTF2F1,GTF2F2,POLR2I,POLR2L,SUPT4H1,CDK13,SUPT16H	8/54
3_Member	Reactome Gene Sets	R-HSA-113418	Formation of the Early Elongation Complex	-4.19701	-3.25414	2962,2963,4686,5438,5441,6827	GTF2F1,GTF2F2,NCBP1,POLR2I,POLR2L,SUPT4H1	6/30
3_Member	Reactome Gene Sets	R-HSA-167158	Formation of the HIV-1 Early Elongation Complex	-4.19701	-3.25414	2962,2963,4686,5438,5441,6827	GTF2F1,GTF2F2,NCBP1,POLR2I,POLR2L,SUPT4H1	6/30
3_Member	Reactome Gene Sets	R-HSA-5654738	Signaling by FGFR2	-4.08193	-3.15325	2962,2963,3185,4670,4686,5438,5441,7311	GTF2F1,GTF2F2,HNRNPF,HNRNPM,NCBP1,POLR2I,POLR2L,UBA52	8/60
3_Member	Reactome Gene Sets	R-HSA-190236	Signaling by FGFR	-3.43785	-2.55044	2962,2963,3185,4670,4686,5438,5441,7311	GTF2F1,GTF2F2,HNRNPF,HNRNPM,NCBP1,POLR2I,POLR2L,UBA52	8/74
3_Member	Reactome Gene Sets	R-HSA-72086	mRNA Capping	-3.33562	-2.45825	2962,2963,4686,5438,5441	GTF2F1,GTF2F2,NCBP1,POLR2I,POLR2L	5/28
3_Member	Reactome Gene Sets	R-HSA-1839126	FGFR2 mutant receptor activation	-3.05802	-2.20361	2962,2963,4686,5438,5441	GTF2F1,GTF2F2,NCBP1,POLR2I,POLR2L	5/32
3_Member	Reactome Gene Sets	R-HSA-9018519	Estrogen-dependent gene expression	-2.93477	-2.08942	1025,2288,2962,2963,3014,3065,3326,5438,5441,5885	CDK9,FKBP4,GTF2F1,GTF2F2,H2AX,HDAC1,HSP90AB1,POLR2I,POLR2L,RAD21	10/131
3_Member	Reactome Gene Sets	R-HSA-8939211	ESR-mediated signaling	-2.73136	-1.90431	857,1025,2288,2773,2962,2963,3014,3065,3326,5438,5441,5885	CAV1,CDK9,FKBP4,GNAI3,GTF2F1,GTF2F2,H2AX,HDAC1,HSP90AB1,POLR2I,POLR2L,RAD21	12/188
3_Member	Reactome Gene Sets	R-HSA-5655253	Signaling by FGFR2 in disease	-2.61142	-1.79744	2962,2963,4686,5438,5441	GTF2F1,GTF2F2,NCBP1,POLR2I,POLR2L	5/40
3_Member	Reactome Gene Sets	R-HSA-167160	RNA Pol II CTD phosphorylation and interaction with CE during HIV infection	-2.44817	-1.65477	2962,2963,5438,5441	GTF2F1,GTF2F2,POLR2I,POLR2L	4/27
3_Member	Reactome Gene Sets	R-HSA-77075	RNA Pol II CTD phosphorylation and interaction with CE	-2.44817	-1.65477	2962,2963,5438,5441	GTF2F1,GTF2F2,POLR2I,POLR2L	4/27
3_Member	Reactome Gene Sets	R-HSA-1226099	Signaling by FGFR in disease	-2.11563	-1.36997	2962,2963,4686,5438,5441	GTF2F1,GTF2F2,NCBP1,POLR2I,POLR2L	5/52
3_Member	Reactome Gene Sets	R-HSA-9006931	Signaling by Nuclear Receptors	-2.11018	-1.36634	857,1025,2288,2773,2962,2963,3014,3065,3326,5438,5441,5885,8841	CAV1,CDK9,FKBP4,GNAI3,GTF2F1,GTF2F2,H2AX,HDAC1,HSP90AB1,POLR2I,POLR2L,RAD21,HDAC3	13/253
4_Summary	Reactome Gene Sets	R-HSA-1640170	Cell Cycle	-17.4074	-15.2767	1021,1778,3014,3065,3326,4001,5111,5438,5441,5528,5529,5683,5686,5690,5692,5694,5709,5885,5983,5984,6117,6118,7083,7311,7532,7533,8607,8636,8815,9183,9688,9918,9978,10111,10213,10383,10393,10726,10856,11004,23279,23511,23636,27243,29922,51588,51659,54107,54821,55920,80028,91754,128866,129401,348995,391,4628,5216,5300,10097,10552,30851	CDK6,DYNC1H1,H2AX,HDAC1,HSP90AB1,LMNB1,PCNA,POLR2I,POLR2L,PPP2R5D,PPP2R5E,PSMA2,PSMA5,PSMB2,PSMB4,PSMB6,PSMD3,RAD21,RFC3,RFC4,RPA1,RPA2,TK1,UBA52,YWHAG,YWHAH,RUVBL1,SSNA1,BANF1,ZW10,NUP93,NCAPD2,RBX1,RAD50,PSMD14,TUBB4B,ANAPC10,NUDC,RUVBL2,KIF2C,NUP160,NUP188,NUP62,CHMP2A,NME7,PIAS4,GINS2,POLE3,ERCC6L,RCC2,FBXL18,NEK9,CHMP4B,NUP35,NUP43,RHOG,MYH10,PFN1,PIN1,ACTR2,ARPC1A,TAX1BP3	62/-
4_Member	Reactome Gene Sets	R-HSA-1640170	Cell Cycle	-17.4074	-15.2767	1021,1778,3014,3065,3326,4001,5111,5438,5441,5528,5529,5683,5686,5690,5692,5694,5709,5885,5983,5984,6117,6118,7083,7311,7532,7533,8607,8636,8815,9183,9688,9918,9978,10111,10213,10383,10393,10726,10856,11004,23279,23511,23636,27243,29922,51588,51659,54107,54821,55920,80028,91754,128866,129401,348995	CDK6,DYNC1H1,H2AX,HDAC1,HSP90AB1,LMNB1,PCNA,POLR2I,POLR2L,PPP2R5D,PPP2R5E,PSMA2,PSMA5,PSMB2,PSMB4,PSMB6,PSMD3,RAD21,RFC3,RFC4,RPA1,RPA2,TK1,UBA52,YWHAG,YWHAH,RUVBL1,SSNA1,BANF1,ZW10,NUP93,NCAPD2,RBX1,RAD50,PSMD14,TUBB4B,ANAPC10,NUDC,RUVBL2,KIF2C,NUP160,NUP188,NUP62,CHMP2A,NME7,PIAS4,GINS2,POLE3,ERCC6L,RCC2,FBXL18,NEK9,CHMP4B,NUP35,NUP43	55/584
4_Member	Reactome Gene Sets	R-HSA-69278	Cell Cycle, Mitotic	-16.455	-14.4137	1021,1778,3014,3065,3326,4001,5111,5528,5529,5683,5686,5690,5692,5694,5709,5885,5983,5984,6117,6118,7083,7311,7532,8636,8815,9183,9688,9918,9978,10213,10383,10393,10726,11004,23279,23511,23636,27243,29922,51659,54107,54821,55920,80028,91754,128866,129401,348995	CDK6,DYNC1H1,H2AX,HDAC1,HSP90AB1,LMNB1,PCNA,PPP2R5D,PPP2R5E,PSMA2,PSMA5,PSMB2,PSMB4,PSMB6,PSMD3,RAD21,RFC3,RFC4,RPA1,RPA2,TK1,UBA52,YWHAG,SSNA1,BANF1,ZW10,NUP93,NCAPD2,RBX1,PSMD14,TUBB4B,ANAPC10,NUDC,KIF2C,NUP160,NUP188,NUP62,CHMP2A,NME7,GINS2,POLE3,ERCC6L,RCC2,FBXL18,NEK9,CHMP4B,NUP35,NUP43	48/475
4_Member	Reactome Gene Sets	R-HSA-68882	Mitotic Anaphase	-15.0201	-13.0611	1778,4001,5528,5529,5683,5686,5690,5692,5694,5709,5885,7311,8815,9183,9688,10213,10383,10393,10726,11004,23279,23511,23636,27243,54821,55920,128866,129401,348995	DYNC1H1,LMNB1,PPP2R5D,PPP2R5E,PSMA2,PSMA5,PSMB2,PSMB4,PSMB6,PSMD3,RAD21,UBA52,BANF1,ZW10,NUP93,PSMD14,TUBB4B,ANAPC10,NUDC,KIF2C,NUP160,NUP188,NUP62,CHMP2A,ERCC6L,RCC2,CHMP4B,NUP35,NUP43	29/186
4_Member	Reactome Gene Sets	R-HSA-2555396	Mitotic Metaphase and Anaphase	-14.9566	-13.0123	1778,4001,5528,5529,5683,5686,5690,5692,5694,5709,5885,7311,8815,9183,9688,10213,10383,10393,10726,11004,23279,23511,23636,27243,54821,55920,128866,129401,348995	DYNC1H1,LMNB1,PPP2R5D,PPP2R5E,PSMA2,PSMA5,PSMB2,PSMB4,PSMB6,PSMD3,RAD21,UBA52,BANF1,ZW10,NUP93,PSMD14,TUBB4B,ANAPC10,NUDC,KIF2C,NUP160,NUP188,NUP62,CHMP2A,ERCC6L,RCC2,CHMP4B,NUP35,NUP43	29/187
4_Member	Reactome Gene Sets	R-HSA-68886	M Phase	-11.8705	-10.1567	1778,3014,4001,5528,5529,5683,5686,5690,5692,5694,5709,5885,7311,7532,8636,8815,9183,9688,9918,10213,10383,10393,10726,11004,23279,23511,23636,27243,29922,54821,55920,91754,128866,129401,348995	DYNC1H1,H2AX,LMNB1,PPP2R5D,PPP2R5E,PSMA2,PSMA5,PSMB2,PSMB4,PSMB6,PSMD3,RAD21,UBA52,YWHAG,SSNA1,BANF1,ZW10,NUP93,NCAPD2,PSMD14,TUBB4B,ANAPC10,NUDC,KIF2C,NUP160,NUP188,NUP62,CHMP2A,NME7,ERCC6L,RCC2,NEK9,CHMP4B,NUP35,NUP43	35/354
4_Member	Reactome Gene Sets	R-HSA-69620	Cell Cycle Checkpoints	-11.4624	-9.81908	1778,3014,5528,5529,5683,5686,5690,5692,5694,5709,5983,5984,6117,6118,7311,7532,7533,9183,10111,10213,10393,10726,11004,23279,51588,54821,55920,348995	DYNC1H1,H2AX,PPP2R5D,PPP2R5E,PSMA2,PSMA5,PSMB2,PSMB4,PSMB6,PSMD3,RFC3,RFC4,RPA1,RPA2,UBA52,YWHAG,YWHAH,ZW10,RAD50,PSMD14,ANAPC10,NUDC,KIF2C,NUP160,PIAS4,ERCC6L,RCC2,NUP43	28/237
4_Member	Reactome Gene Sets	R-HSA-2467813	Separation of Sister Chromatids	-10.1442	-8.58605	1778,5528,5529,5683,5686,5690,5692,5694,5709,5885,7311,9183,10213,10383,10393,10726,11004,23279,54821,55920,348995	DYNC1H1,PPP2R5D,PPP2R5E,PSMA2,PSMA5,PSMB2,PSMB4,PSMB6,PSMD3,RAD21,UBA52,ZW10,PSMD14,TUBB4B,ANAPC10,NUDC,KIF2C,NUP160,ERCC6L,RCC2,NUP43	21/150
4_Member	Reactome Gene Sets	R-HSA-69481	G2/M Checkpoints	-7.77789	-6.38988	3014,5683,5686,5690,5692,5694,5709,5983,5984,6117,6118,7311,7532,7533,10111,10213,51588	H2AX,PSMA2,PSMA5,PSMB2,PSMB4,PSMB6,PSMD3,RFC3,RFC4,RPA1,RPA2,UBA52,YWHAG,YWHAH,RAD50,PSMD14,PIAS4	17/132
4_Member	Reactome Gene Sets	R-HSA-68877	Mitotic Prometaphase	-6.05744	-4.85872	1778,5528,5529,5885,7532,8636,9183,9918,10383,10726,11004,23279,29922,54821,55920,91754,348995	DYNC1H1,PPP2R5D,PPP2R5E,RAD21,YWHAG,SSNA1,ZW10,NCAPD2,TUBB4B,NUDC,KIF2C,NUP160,NME7,ERCC6L,RCC2,NEK9,NUP43	17/173
4_Member	Reactome Gene Sets	R-HSA-195258	RHO GTPase Effectors	-5.44537	-4.36438	391,1778,3014,4628,5216,5300,5528,5529,7532,7533,9183,10097,10383,10552,10726,11004,23279,30851,54821,55920,348995	RHOG,DYNC1H1,H2AX,MYH10,PFN1,PIN1,PPP2R5D,PPP2R5E,YWHAG,YWHAH,ZW10,ACTR2,TUBB4B,ARPC1A,NUDC,KIF2C,NUP160,TAX1BP3,ERCC6L,RCC2,NUP43	21/278
4_Member	Reactome Gene Sets	R-HSA-9648025	EML4 and NUDC in mitotic spindle formation	-5.3927	-4.31761	1778,5528,5529,9183,10383,10726,11004,23279,54821,55920,91754,348995	DYNC1H1,PPP2R5D,PPP2R5E,ZW10,TUBB4B,NUDC,KIF2C,NUP160,ERCC6L,RCC2,NEK9,NUP43	12/99
4_Member	Reactome Gene Sets	R-HSA-2500257	Resolution of Sister Chromatid Cohesion	-5.0391	-4.00327	1778,5528,5529,5885,9183,10383,10726,11004,23279,54821,55920,348995	DYNC1H1,PPP2R5D,PPP2R5E,RAD21,ZW10,TUBB4B,NUDC,KIF2C,NUP160,ERCC6L,RCC2,NUP43	12/107
4_Member	Reactome Gene Sets	R-HSA-69618	Mitotic Spindle Checkpoint	-4.88993	-3.87162	1778,5528,5529,9183,10393,10726,11004,23279,54821,55920,348995	DYNC1H1,PPP2R5D,PPP2R5E,ZW10,ANAPC10,NUDC,KIF2C,NUP160,ERCC6L,RCC2,NUP43	11/93
4_Member	Reactome Gene Sets	R-HSA-141424	Amplification of signal from the kinetochores	-4.75934	-3.76604	1778,5528,5529,9183,10726,11004,23279,54821,55920,348995	DYNC1H1,PPP2R5D,PPP2R5E,ZW10,NUDC,KIF2C,NUP160,ERCC6L,RCC2,NUP43	10/79
4_Member	Reactome Gene Sets	R-HSA-141444	Amplification of signal from unattached kinetochores via a MAD2 inhibitory signal	-4.75934	-3.76604	1778,5528,5529,9183,10726,11004,23279,54821,55920,348995	DYNC1H1,PPP2R5D,PPP2R5E,ZW10,NUDC,KIF2C,NUP160,ERCC6L,RCC2,NUP43	10/79
4_Member	Reactome Gene Sets	R-HSA-5663220	RHO GTPases Activate Formins	-4.64224	-3.66013	1778,5216,5528,5529,9183,10383,10726,11004,23279,54821,55920,348995	DYNC1H1,PFN1,PPP2R5D,PPP2R5E,ZW10,TUBB4B,NUDC,KIF2C,NUP160,ERCC6L,RCC2,NUP43	12/117
5_Summary	Reactome Gene Sets	R-HSA-5653656	Vesicle-mediated transport	-16.0662	-14.0427	382,811,1176,1777,1778,2589,2799,3267,3833,3998,4905,5869,5878,7184,7311,7532,7533,8533,8729,8774,8906,9183,9276,9318,9341,9342,9525,9685,10097,10113,10383,10552,10808,10960,10972,10980,11004,11252,22796,22870,23011,26286,27095,27243,54874,55014,55860,64746,83452,91949,128866,149371,201475,2923,3098,5589,5887,6675,7415,9761,10956,29925	ARF6,CALR,AP3S1,DNASE2,DYNC1H1,GALNT1,GNS,AGFG1,KIFC1,LMAN1,NSF,RAB5B,RAB5C,HSP90B1,UBA52,YWHAG,YWHAH,COPS3,GBF1,NAPG,AP1G2,ZW10,COPB2,COPS2,VAMP3,SNAP29,VPS4B,CLINT1,ACTR2,PREB,TUBB4B,ARPC1A,HSPH1,LMAN2,TMED10,COPS6,KIF2C,PACSIN2,COG2,PPP6R1,RAB21,ARFGAP3,TRAPPC3,CHMP2A,FNBP1L,STX17,ACTR10,ACBD3,RAB33B,COG7,CHMP4B,EXOC8,RAB12,PDIA3,HK1,PRKCSH,RAD23B,UAP1,VCP,MLEC,OS9,GMPPB	62/-
5_Member	Reactome Gene Sets	R-HSA-5653656	Vesicle-mediated transport	-16.0662	-14.0427	382,811,1176,1777,1778,2589,2799,3267,3833,3998,4905,5869,5878,7184,7311,7532,7533,8533,8729,8774,8906,9183,9276,9318,9341,9342,9525,9685,10097,10113,10383,10552,10808,10960,10972,10980,11004,11252,22796,22870,23011,26286,27095,27243,54874,55014,55860,64746,83452,91949,128866,149371,201475	ARF6,CALR,AP3S1,DNASE2,DYNC1H1,GALNT1,GNS,AGFG1,KIFC1,LMAN1,NSF,RAB5B,RAB5C,HSP90B1,UBA52,YWHAG,YWHAH,COPS3,GBF1,NAPG,AP1G2,ZW10,COPB2,COPS2,VAMP3,SNAP29,VPS4B,CLINT1,ACTR2,PREB,TUBB4B,ARPC1A,HSPH1,LMAN2,TMED10,COPS6,KIF2C,PACSIN2,COG2,PPP6R1,RAB21,ARFGAP3,TRAPPC3,CHMP2A,FNBP1L,STX17,ACTR10,ACBD3,RAB33B,COG7,CHMP4B,EXOC8,RAB12	53/585
5_Member	Reactome Gene Sets	R-HSA-199991	Membrane Trafficking	-15.1456	-13.1714	382,1176,1777,1778,2589,2799,3267,3833,3998,4905,5869,5878,7311,7532,7533,8533,8729,8774,8906,9183,9276,9318,9341,9342,9525,9685,10097,10113,10383,10552,10960,10972,10980,11004,11252,22796,22870,23011,26286,27095,27243,54874,55014,55860,64746,83452,91949,128866,149371,201475	ARF6,AP3S1,DNASE2,DYNC1H1,GALNT1,GNS,AGFG1,KIFC1,LMAN1,NSF,RAB5B,RAB5C,UBA52,YWHAG,YWHAH,COPS3,GBF1,NAPG,AP1G2,ZW10,COPB2,COPS2,VAMP3,SNAP29,VPS4B,CLINT1,ACTR2,PREB,TUBB4B,ARPC1A,LMAN2,TMED10,COPS6,KIF2C,PACSIN2,COG2,PPP6R1,RAB21,ARFGAP3,TRAPPC3,CHMP2A,FNBP1L,STX17,ACTR10,ACBD3,RAB33B,COG7,CHMP4B,EXOC8,RAB12	50/553
5_Member	Reactome Gene Sets	R-HSA-446203	Asparagine N-linked glycosylation	-9.77209	-8.22572	811,1778,2923,3098,3998,4905,5589,5887,6675,7311,7415,8729,8774,9276,9761,10113,10383,10956,10960,10972,22796,22870,26286,27095,29925,55014,55860,91949	CALR,DYNC1H1,PDIA3,HK1,LMAN1,NSF,PRKCSH,RAD23B,UAP1,UBA52,VCP,GBF1,NAPG,COPB2,MLEC,PREB,TUBB4B,OS9,LMAN2,TMED10,COG2,PPP6R1,ARFGAP3,TRAPPC3,GMPPB,STX17,ACTR10,COG7	28/279
5_Member	Reactome Gene Sets	R-HSA-199977	ER to Golgi Anterograde Transport	-7.4387	-6.07034	1778,3998,4905,8729,8774,9276,10113,10383,10960,10972,22796,22870,26286,27095,55014,55860,91949	DYNC1H1,LMAN1,NSF,GBF1,NAPG,COPB2,PREB,TUBB4B,LMAN2,TMED10,COG2,PPP6R1,ARFGAP3,TRAPPC3,STX17,ACTR10,COG7	17/139
5_Member	Reactome Gene Sets	R-HSA-6811442	Intra-Golgi and retrograde Golgi-to-ER traffic	-6.38261	-5.15429	1778,2589,3833,4905,8729,8774,9183,9276,9341,9342,10383,10972,11004,22796,26286,55860,83452,91949	DYNC1H1,GALNT1,KIFC1,NSF,GBF1,NAPG,ZW10,COPB2,VAMP3,SNAP29,TUBB4B,TMED10,KIF2C,COG2,ARFGAP3,ACTR10,RAB33B,COG7	18/183
5_Member	Reactome Gene Sets	R-HSA-948021	Transport to the Golgi and subsequent modification	-6.16445	-4.95253	1778,3998,4905,8729,8774,9276,10113,10383,10960,10972,22796,22870,26286,27095,55014,55860,91949	DYNC1H1,LMAN1,NSF,GBF1,NAPG,COPB2,PREB,TUBB4B,LMAN2,TMED10,COG2,PPP6R1,ARFGAP3,TRAPPC3,STX17,ACTR10,COG7	17/170
5_Member	Reactome Gene Sets	R-HSA-8856688	Golgi-to-ER retrograde transport	-5.12226	-4.0774	1778,2589,3833,4905,8729,8774,9183,9276,10383,10972,11004,26286,55860	DYNC1H1,GALNT1,KIFC1,NSF,GBF1,NAPG,ZW10,COPB2,TUBB4B,TMED10,KIF2C,ARFGAP3,ACTR10	13/123
5_Member	Reactome Gene Sets	R-HSA-6807878	COPI-mediated anterograde transport	-4.84517	-3.84037	1778,4905,8729,8774,9276,10383,10972,22796,26286,55860,91949	DYNC1H1,NSF,GBF1,NAPG,COPB2,TUBB4B,TMED10,COG2,ARFGAP3,ACTR10,COG7	11/94
5_Member	Reactome Gene Sets	R-HSA-6811434	COPI-dependent Golgi-to-ER retrograde traffic	-4.13945	-3.20231	3833,4905,8729,8774,9183,9276,10383,10972,11004,26286	KIFC1,NSF,GBF1,NAPG,ZW10,COPB2,TUBB4B,TMED10,KIF2C,ARFGAP3	10/93
6_Summary	Reactome Gene Sets	R-HSA-1280215	Cytokine Signaling in Immune system	-12.962	-11.0968	1445,1660,1845,1965,1973,2185,3185,3305,3309,3313,3383,3664,3726,3836,4001,4282,5055,5300,5306,5528,5604,5610,5683,5686,5690,5692,5694,5709,5721,6059,6773,7184,7311,7318,7706,8517,9040,9049,9246,9688,9978,10213,10383,23118,23279,23511,23636,121457,129401,200081,348995,1025,8815,5111,5983,5984,6117,6118,10393,51659,54107,677,5393,8570,11340,51010,54512,7415,10613,10956,27248,5885,572,7532,7533,101…	CSK,DHX9,DUSP3,EIF2S1,EIF4A1,PTK2B,HNRNPF,HSPA1L,HSPA5,HSPA9,ICAM1,IRF6,JUNB,KPNA1,LMNB1,MIF,SERPINB2,PIN1,PITPNA,PPP2R5D,MAP2K1,EIF2AK2,PSMA2,PSMA5,PSMB2,PSMB4,PSMB6,PSMD3,PSME2,ABCE1,STAT2,HSP90B1,UBA52,UBA7,TRIM25,IKBKG,UBE2M,AIP,UBE2L6,NUP93,RBX1,PSMD14,TUBB4B,TAB2,NUP160,NUP188,NUP62,IKBIP,NUP35,TXLNA,NUP43,CDK9,BANF1,PCNA,RFC3,RFC4,RPA1,RPA2,ANAPC10,GINS2,POLE3,ZFP36L1,EXOSC9,KHSRP,EXOSC8,E…	135/-
6_Member	Reactome Gene Sets	R-HSA-1280215	Cytokine Signaling in Immune system	-12.962	-11.0968	1445,1660,1845,1965,1973,2185,3185,3305,3309,3313,3383,3664,3726,3836,4001,4282,5055,5300,5306,5528,5604,5610,5683,5686,5690,5692,5694,5709,5721,6059,6773,7184,7311,7318,7706,8517,9040,9049,9246,9688,9978,10213,10383,23118,23279,23511,23636,121457,129401,200081,348995	CSK,DHX9,DUSP3,EIF2S1,EIF4A1,PTK2B,HNRNPF,HSPA1L,HSPA5,HSPA9,ICAM1,IRF6,JUNB,KPNA1,LMNB1,MIF,SERPINB2,PIN1,PITPNA,PPP2R5D,MAP2K1,EIF2AK2,PSMA2,PSMA5,PSMB2,PSMB4,PSMB6,PSMD3,PSME2,ABCE1,STAT2,HSP90B1,UBA52,UBA7,TRIM25,IKBKG,UBE2M,AIP,UBE2L6,NUP93,RBX1,PSMD14,TUBB4B,TAB2,NUP160,NUP188,NUP62,IKBIP,NUP35,TXLNA,NUP43	51/651
6_Member	Reactome Gene Sets	R-HSA-162909	Host Interactions of HIV factors	-11.7217	-10.0528	1025,3836,5683,5686,5690,5692,5694,5709,7311,8815,9688,9978,10213,23279,23511,23636,129401,348995	CDK9,KPNA1,PSMA2,PSMA5,PSMB2,PSMB4,PSMB6,PSMD3,UBA52,BANF1,NUP93,RBX1,PSMD14,NUP160,NUP188,NUP62,NUP35,NUP43	18/87
6_Member	Reactome Gene Sets	R-HSA-69239	Synthesis of DNA	-9.97134	-8.41913	5111,5683,5686,5690,5692,5694,5709,5983,5984,6117,6118,7311,9978,10213,10393,51659,54107	PCNA,PSMA2,PSMA5,PSMB2,PSMB4,PSMB6,PSMD3,RFC3,RFC4,RPA1,RPA2,UBA52,RBX1,PSMD14,ANAPC10,GINS2,POLE3	17/96
6_Member	Reactome Gene Sets	R-HSA-450531	Regulation of mRNA stability by proteins that bind AU-rich elements	-9.6988	-8.17499	677,5393,5683,5686,5690,5692,5694,5709,7311,8570,10213,11340,51010,54512	ZFP36L1,EXOSC9,PSMA2,PSMA5,PSMB2,PSMB4,PSMB6,PSMD3,UBA52,KHSRP,PSMD14,EXOSC8,EXOSC3,EXOSC4	14/63
6_Member	Reactome Gene Sets	R-HSA-5678895	Defective CFTR causes cystic fibrosis	-9.647	-8.12865	5683,5686,5690,5692,5694,5709,7311,7415,10213,10613,10956,27248	PSMA2,PSMA5,PSMB2,PSMB4,PSMB6,PSMD3,UBA52,VCP,PSMD14,ERLIN1,OS9,ERLEC1	12/43
6_Member	Reactome Gene Sets	R-HSA-5362768	Hh mutants are degraded by ERAD	-9.08157	-7.58441	5683,5686,5690,5692,5694,5709,7311,7415,10213,10956,27248	PSMA2,PSMA5,PSMB2,PSMB4,PSMB6,PSMD3,UBA52,VCP,PSMD14,OS9,ERLEC1	11/38
6_Member	Reactome Gene Sets	R-HSA-5387390	Hh mutants abrogate ligand secretion	-8.69043	-7.22803	5683,5686,5690,5692,5694,5709,7311,7415,10213,10956,27248	PSMA2,PSMA5,PSMB2,PSMB4,PSMB6,PSMD3,UBA52,VCP,PSMD14,OS9,ERLEC1	11/41
6_Member	Reactome Gene Sets	R-HSA-69242	S Phase	-8.65463	-7.19698	5111,5683,5686,5690,5692,5694,5709,5885,5983,5984,6117,6118,7311,9978,10213,10393,51659,54107	PCNA,PSMA2,PSMA5,PSMB2,PSMB4,PSMB6,PSMD3,RAD21,RFC3,RFC4,RPA1,RPA2,UBA52,RBX1,PSMD14,ANAPC10,GINS2,POLE3	18/131
6_Member	Reactome Gene Sets	R-HSA-5357801	Programmed Cell Death	-8.6468	-7.19384	572,3836,4001,5683,5686,5690,5692,5694,5709,7311,7532,7533,10134,10213,11140,27243,128866	BAD,KPNA1,LMNB1,PSMA2,PSMA5,PSMB2,PSMB4,PSMB6,PSMD3,UBA52,YWHAG,YWHAH,BCAP31,PSMD14,CDC37,CHMP2A,CHMP4B	17/116
6_Member	Reactome Gene Sets	R-HSA-195253	Degradation of beta-catenin by the destruction complex	-8.60287	-7.15455	3065,5528,5529,5683,5686,5690,5692,5694,5709,7311,9978,10213	HDAC1,PPP2R5D,PPP2R5E,PSMA2,PSMA5,PSMB2,PSMB4,PSMB6,PSMD3,UBA52,RBX1,PSMD14	12/52
6_Member	Reactome Gene Sets	R-HSA-5619115	Disorders of transmembrane transporters	-8.49441	-7.05069	3098,5683,5686,5690,5692,5694,5709,7311,7415,9688,10213,10613,10956,23279,23511,23636,27248,129401,348995	HK1,PSMA2,PSMA5,PSMB2,PSMB4,PSMB6,PSMD3,UBA52,VCP,NUP93,PSMD14,ERLIN1,OS9,NUP160,NUP188,NUP62,ERLEC1,NUP35,NUP43	19/150
6_Member	Reactome Gene Sets	R-HSA-69306	DNA Replication	-8.38615	-6.94698	3014,3836,5111,5683,5686,5690,5692,5694,5709,5983,5984,6117,6118,7311,9978,10213,10393,23633,51659,54107	H2AX,KPNA1,PCNA,PSMA2,PSMA5,PSMB2,PSMB4,PSMB6,PSMD3,RFC3,RFC4,RPA1,RPA2,UBA52,RBX1,PSMD14,ANAPC10,KPNA6,GINS2,POLE3	20/169
6_Member	Reactome Gene Sets	R-HSA-8854050	FBXL7 down-regulates AURKA during mitotic entry and in early mitosis	-8.11461	-6.69454	5683,5686,5690,5692,5694,5709,7311,9978,10213,80028	PSMA2,PSMA5,PSMB2,PSMB4,PSMB6,PSMD3,UBA52,RBX1,PSMD14,FBXL18	10/36
6_Member	Reactome Gene Sets	R-HSA-5358346	Hedgehog ligand biogenesis	-8.00522	-6.59238	5683,5686,5690,5692,5694,5709,7311,7415,10213,10956,27248	PSMA2,PSMA5,PSMB2,PSMB4,PSMB6,PSMD3,UBA52,VCP,PSMD14,OS9,ERLEC1	11/47
6_Member	Reactome Gene Sets	R-HSA-382556	ABC-family proteins mediated transport	-7.90052	-6.49192	1965,5683,5686,5690,5692,5694,5709,5824,7311,7415,10213,10613,10956,27248	EIF2S1,PSMA2,PSMA5,PSMB2,PSMB4,PSMB6,PSMD3,PEX19,UBA52,VCP,PSMD14,ERLIN1,OS9,ERLEC1	14/85
6_Member	Reactome Gene Sets	R-HSA-5619084	ABC transporter disorders	-7.84685	-6.44245	5683,5686,5690,5692,5694,5709,7311,7415,10213,10613,10956,27248	PSMA2,PSMA5,PSMB2,PSMB4,PSMB6,PSMD3,UBA52,VCP,PSMD14,ERLIN1,OS9,ERLEC1	12/60
6_Member	Reactome Gene Sets	R-HSA-449147	Signaling by Interleukins	-7.34907	-5.99209	1845,2185,3185,3313,3383,3726,4001,4282,5055,5306,5528,5604,5683,5686,5690,5692,5694,5709,5721,6773,7184,7311,8517,9049,9978,10213,23118,121457,200081	DUSP3,PTK2B,HNRNPF,HSPA9,ICAM1,JUNB,LMNB1,MIF,SERPINB2,PITPNA,PPP2R5D,MAP2K1,PSMA2,PSMA5,PSMB2,PSMB4,PSMB6,PSMD3,PSME2,STAT2,HSP90B1,UBA52,IKBKG,AIP,RBX1,PSMD14,TAB2,IKBIP,TXLNA	29/381
6_Member	Reactome Gene Sets	R-HSA-1236974	ER-Phagosome pathway	-7.28064	-5.93108	811,2923,5683,5686,5690,5692,5694,5709,7311,8517,9341,10213	CALR,PDIA3,PSMA2,PSMA5,PSMB2,PSMB4,PSMB6,PSMD3,UBA52,IKBKG,VAMP3,PSMD14	12/67
6_Member	Reactome Gene Sets	R-HSA-9020702	Interleukin-1 signaling	-7.24172	-5.89947	5604,5683,5686,5690,5692,5694,5709,7311,8517,9978,10213,23118,121457	MAP2K1,PSMA2,PSMA5,PSMB2,PSMB4,PSMB6,PSMD3,UBA52,IKBKG,RBX1,PSMD14,TAB2,IKBIP	13/81
6_Member	Reactome Gene Sets	R-HSA-8951664	Neddylation	-7.1755	-5.83685	1642,5683,5686,5690,5692,5694,5709,7311,7415,8533,9040,9318,9978,10213,10238,10980,25879,29099,54951,80028	DDB1,PSMA2,PSMA5,PSMB2,PSMB4,PSMB6,PSMD3,UBA52,VCP,COPS3,UBE2M,COPS2,RBX1,PSMD14,DCAF7,COPS6,DCAF13,COMMD9,COMMD8,FBXL18	20/199
6_Member	Reactome Gene Sets	R-HSA-180585	Vif-mediated degradation of APOBEC3G	-7.15813	-5.8266	5683,5686,5690,5692,5694,5709,7311,9978,10213	PSMA2,PSMA5,PSMB2,PSMB4,PSMB6,PSMD3,UBA52,RBX1,PSMD14	9/34
6_Member	Reactome Gene Sets	R-HSA-9762114	GSK3B and BTRC:CUL1-mediated-degradation of NFE2L2	-7.15813	-5.8266	5683,5686,5690,5692,5694,5709,7311,9978,10213	PSMA2,PSMA5,PSMB2,PSMB4,PSMB6,PSMD3,UBA52,RBX1,PSMD14	9/34
6_Member	Reactome Gene Sets	R-HSA-109581	Apoptosis	-7.1473	-5.81928	572,3836,4001,5683,5686,5690,5692,5694,5709,7311,7532,7533,10134,10213	BAD,KPNA1,LMNB1,PSMA2,PSMA5,PSMB2,PSMB4,PSMB6,PSMD3,UBA52,YWHAG,YWHAH,BCAP31,PSMD14	14/97
6_Member	Reactome Gene Sets	R-HSA-5610780	Degradation of GLI1 by the proteasome	-7.03824	-5.71717	5683,5686,5690,5692,5694,5709,7311,9978,10213	PSMA2,PSMA5,PSMB2,PSMB4,PSMB6,PSMD3,UBA52,RBX1,PSMD14	9/35
6_Member	Reactome Gene Sets	R-HSA-9907900	Proteasome assembly	-7.00236	-5.68813	5683,5686,5690,5692,5694,5699,5709,5721,10213,84262	PSMA2,PSMA5,PSMB2,PSMB4,PSMB6,PSMB10,PSMD3,PSME2,PSMD14,PSMG3	10/46
6_Member	Reactome Gene Sets	R-HSA-5610783	Degradation of GLI2 by the proteasome	-6.92251	-5.62492	5683,5686,5690,5692,5694,5709,7311,9978,10213	PSMA2,PSMA5,PSMB2,PSMB4,PSMB6,PSMD3,UBA52,RBX1,PSMD14	9/36
6_Member	Reactome Gene Sets	R-HSA-5610785	GLI3 is processed to GLI3R by the proteasome	-6.92251	-5.62492	5683,5686,5690,5692,5694,5709,7311,9978,10213	PSMA2,PSMA5,PSMB2,PSMB4,PSMB6,PSMD3,UBA52,RBX1,PSMD14	9/36
6_Member	Reactome Gene Sets	R-HSA-4641258	Degradation of DVL	-6.81066	-5.51633	5683,5686,5690,5692,5694,5709,7311,9978,10213	PSMA2,PSMA5,PSMB2,PSMB4,PSMB6,PSMD3,UBA52,RBX1,PSMD14	9/37
6_Member	Reactome Gene Sets	R-HSA-453279	Mitotic G1 phase and G1/S transition	-6.76433	-5.47643	1021,3065,5111,5683,5686,5690,5692,5694,5709,6117,6118,7083,7311,10213,54107	CDK6,HDAC1,PCNA,PSMA2,PSMA5,PSMB2,PSMB4,PSMB6,PSMD3,RPA1,RPA2,TK1,UBA52,PSMD14,POLE3	15/120
6_Member	Reactome Gene Sets	R-HSA-2871837	FCERI mediated NF-kB activation	-6.7257	-5.44414	5683,5686,5690,5692,5694,5709,7311,8517,10213,23118	PSMA2,PSMA5,PSMB2,PSMB4,PSMB6,PSMD3,UBA52,IKBKG,PSMD14,TAB2	10/49
6_Member	Reactome Gene Sets	R-HSA-5607761	Dectin-1 mediated noncanonical NF-kB signaling	-6.70248	-5.43333	5683,5686,5690,5692,5694,5709,7311,9040,10213	PSMA2,PSMA5,PSMB2,PSMB4,PSMB6,PSMD3,UBA52,UBE2M,PSMD14	9/38
6_Member	Reactome Gene Sets	R-HSA-5676590	NIK-->noncanonical NF-kB signaling	-6.70248	-5.43333	5683,5686,5690,5692,5694,5709,7311,9040,10213	PSMA2,PSMA5,PSMB2,PSMB4,PSMB6,PSMD3,UBA52,UBE2M,PSMD14	9/38
6_Member	Reactome Gene Sets	R-HSA-9604323	Negative regulation of NOTCH4 signaling	-6.70248	-5.43333	5683,5686,5690,5692,5694,5709,7311,9978,10213	PSMA2,PSMA5,PSMB2,PSMB4,PSMB6,PSMD3,UBA52,RBX1,PSMD14	9/38
6_Member	Reactome Gene Sets	R-HSA-69206	G1/S Transition	-6.60354	-5.34948	3065,5111,5683,5686,5690,5692,5694,5709,6117,6118,7083,7311,10213,54107	HDAC1,PCNA,PSMA2,PSMA5,PSMB2,PSMB4,PSMB6,PSMD3,RPA1,RPA2,TK1,UBA52,PSMD14,POLE3	14/107
6_Member	Reactome Gene Sets	R-HSA-1169091	Activation of NF-kappaB in B cells	-6.59773	-5.34948	5683,5686,5690,5692,5694,5709,7311,8517,10213	PSMA2,PSMA5,PSMB2,PSMB4,PSMB6,PSMD3,UBA52,IKBKG,PSMD14	9/39
6_Member	Reactome Gene Sets	R-HSA-5607764	CLEC7A (Dectin-1) signaling	-6.53368	-5.29693	5683,5686,5690,5692,5694,5709,7311,8517,9040,10213,23118	PSMA2,PSMA5,PSMB2,PSMB4,PSMB6,PSMD3,UBA52,IKBKG,UBE2M,PSMD14,TAB2	11/64
6_Member	Reactome Gene Sets	R-HSA-1236975	Antigen processing-Cross presentation	-6.3404	-5.11486	811,2923,5683,5686,5690,5692,5694,5709,7311,8517,9341,10213	CALR,PDIA3,PSMA2,PSMA5,PSMB2,PSMB4,PSMB6,PSMD3,UBA52,IKBKG,VAMP3,PSMD14	12/81
6_Member	Reactome Gene Sets	R-HSA-180534	Vpu mediated degradation of CD4	-6.21431	-4.99969	5683,5686,5690,5692,5694,5709,7311,10213	PSMA2,PSMA5,PSMB2,PSMB4,PSMB6,PSMD3,UBA52,PSMD14	8/32
6_Member	Reactome Gene Sets	R-HSA-211733	Regulation of activated PAK-2p34 by proteasome mediated degradation	-6.21431	-4.99969	5683,5686,5690,5692,5694,5709,7311,10213	PSMA2,PSMA5,PSMB2,PSMB4,PSMB6,PSMD3,UBA52,PSMD14	8/32
6_Member	Reactome Gene Sets	R-HSA-349425	Autodegradation of the E3 ubiquitin ligase COP1	-6.21431	-4.99969	5683,5686,5690,5692,5694,5709,7311,10213	PSMA2,PSMA5,PSMB2,PSMB4,PSMB6,PSMD3,UBA52,PSMD14	8/32
6_Member	Reactome Gene Sets	R-HSA-1234176	Oxygen-dependent proline hydroxylation of Hypoxia-inducible Factor Alpha	-6.11925	-4.91265	5683,5686,5690,5692,5694,5709,7311,9978,10213	PSMA2,PSMA5,PSMB2,PSMB4,PSMB6,PSMD3,UBA52,RBX1,PSMD14	9/44
6_Member	Reactome Gene Sets	R-HSA-75815	Ubiquitin-dependent degradation of Cyclin D	-6.10283	-4.90149	5683,5686,5690,5692,5694,5709,7311,10213	PSMA2,PSMA5,PSMB2,PSMB4,PSMB6,PSMD3,UBA52,PSMD14	8/33
6_Member	Reactome Gene Sets	R-HSA-69002	DNA Replication Pre-Initiation	-6.01142	-4.81529	3014,3836,5683,5686,5690,5692,5694,5709,6117,6118,7311,10213,10393,23633,54107	H2AX,KPNA1,PSMA2,PSMA5,PSMB2,PSMB4,PSMB6,PSMD3,RPA1,RPA2,UBA52,PSMD14,ANAPC10,KPNA6,POLE3	15/137
6_Member	Reactome Gene Sets	R-HSA-8852276	The role of GTSE1 in G2/M progression after G2 checkpoint	-6.00636	-4.8128	3326,5683,5686,5690,5692,5694,5709,7311,10213,10383	HSP90AB1,PSMA2,PSMA5,PSMB2,PSMB4,PSMB6,PSMD3,UBA52,PSMD14,TUBB4B	10/58
6_Member	Reactome Gene Sets	R-HSA-69601	Ubiquitin Mediated Degradation of Phosphorylated Cdc25A	-5.99541	-4.8095	5683,5686,5690,5692,5694,5709,7311,10213	PSMA2,PSMA5,PSMB2,PSMB4,PSMB6,PSMD3,UBA52,PSMD14	8/34
6_Member	Reactome Gene Sets	R-HSA-69610	p53-Independent DNA Damage Response	-5.99541	-4.8095	5683,5686,5690,5692,5694,5709,7311,10213	PSMA2,PSMA5,PSMB2,PSMB4,PSMB6,PSMD3,UBA52,PSMD14	8/34
6_Member	Reactome Gene Sets	R-HSA-69613	p53-Independent G1/S DNA damage checkpoint	-5.99541	-4.8095	5683,5686,5690,5692,5694,5709,7311,10213	PSMA2,PSMA5,PSMB2,PSMB4,PSMB6,PSMD3,UBA52,PSMD14	8/34
6_Member	Reactome Gene Sets	R-HSA-69275	G2/M Transition	-5.94863	-4.77069	1778,3326,5683,5686,5690,5692,5694,5709,7311,7532,8636,9978,10213,10383,29922,80028	DYNC1H1,HSP90AB1,PSMA2,PSMA5,PSMB2,PSMB4,PSMB6,PSMD3,UBA52,YWHAG,SSNA1,RBX1,PSMD14,TUBB4B,NME7,FBXL18	16/157
6_Member	Reactome Gene Sets	R-HSA-174084	Autodegradation of Cdh1 by Cdh1:APC/C	-5.94615	-4.77069	5683,5686,5690,5692,5694,5709,7311,10213,10393	PSMA2,PSMA5,PSMB2,PSMB4,PSMB6,PSMD3,UBA52,PSMD14,ANAPC10	9/46
6_Member	Reactome Gene Sets	R-HSA-8939902	Regulation of RUNX2 expression and activity	-5.94615	-4.77069	5683,5686,5690,5692,5694,5709,7311,9978,10213	PSMA2,PSMA5,PSMB2,PSMB4,PSMB6,PSMD3,UBA52,RBX1,PSMD14	9/46
6_Member	Reactome Gene Sets	R-HSA-169911	Regulation of Apoptosis	-5.8918	-4.72803	5683,5686,5690,5692,5694,5709,7311,10213	PSMA2,PSMA5,PSMB2,PSMB4,PSMB6,PSMD3,UBA52,PSMD14	8/35
6_Member	Reactome Gene Sets	R-HSA-174113	SCF-beta-TrCP mediated degradation of Emi1	-5.8918	-4.72803	5683,5686,5690,5692,5694,5709,7311,10213	PSMA2,PSMA5,PSMB2,PSMB4,PSMB6,PSMD3,UBA52,PSMD14	8/35
6_Member	Reactome Gene Sets	R-HSA-4641257	Degradation of AXIN	-5.8918	-4.72803	5683,5686,5690,5692,5694,5709,7311,10213	PSMA2,PSMA5,PSMB2,PSMB4,PSMB6,PSMD3,UBA52,PSMD14	8/35
6_Member	Reactome Gene Sets	R-HSA-453274	Mitotic G2-G2/M phases	-5.8752	-4.71384	1778,3326,5683,5686,5690,5692,5694,5709,7311,7532,8636,9978,10213,10383,29922,80028	DYNC1H1,HSP90AB1,PSMA2,PSMA5,PSMB2,PSMB4,PSMB6,PSMD3,UBA52,YWHAG,SSNA1,RBX1,PSMD14,TUBB4B,NME7,FBXL18	16/159
6_Member	Reactome Gene Sets	R-HSA-174154	APC/C:Cdc20 mediated degradation of Securin	-5.86302	-4.7064	5683,5686,5690,5692,5694,5709,7311,10213,10393	PSMA2,PSMA5,PSMB2,PSMB4,PSMB6,PSMD3,UBA52,PSMD14,ANAPC10	9/47
6_Member	Reactome Gene Sets	R-HSA-983169	Class I MHC mediated antigen processing & presentation	-5.84234	-4.68807	642,811,2923,3309,5683,5686,5690,5692,5694,5709,7311,7318,8517,9040,9246,9341,9978,10134,10213,10393,65264,79876,80028	BLMH,CALR,PDIA3,HSPA5,PSMA2,PSMA5,PSMB2,PSMB4,PSMB6,PSMD3,UBA52,UBA7,IKBKG,UBE2M,UBE2L6,VAMP3,RBX1,BCAP31,PSMD14,ANAPC10,UBE2Z,UBA5,FBXL18	23/307
6_Member	Reactome Gene Sets	R-HSA-5658442	Regulation of RAS by GAPs	-5.78202	-4.63705	5683,5686,5690,5692,5694,5709,7311,9978,10213	PSMA2,PSMA5,PSMB2,PSMB4,PSMB6,PSMD3,UBA52,RBX1,PSMD14	9/48
6_Member	Reactome Gene Sets	R-HSA-450408	AUF1 (hnRNP D0) binds and destabilizes mRNA	-5.69502	-4.56138	5683,5686,5690,5692,5694,5709,7311,10213	PSMA2,PSMA5,PSMB2,PSMB4,PSMB6,PSMD3,UBA52,PSMD14	8/37
6_Member	Reactome Gene Sets	R-HSA-69541	Stabilization of p53	-5.69502	-4.56138	5683,5686,5690,5692,5694,5709,7311,10213	PSMA2,PSMA5,PSMB2,PSMB4,PSMB6,PSMD3,UBA52,PSMD14	8/37
6_Member	Reactome Gene Sets	R-HSA-8941858	Regulation of RUNX3 expression and activity	-5.69502	-4.56138	5683,5686,5690,5692,5694,5709,7311,10213	PSMA2,PSMA5,PSMB2,PSMB4,PSMB6,PSMD3,UBA52,PSMD14	8/37
6_Member	Reactome Gene Sets	R-HSA-4086400	PCP/CE pathway	-5.66358	-4.53217	5216,5683,5686,5690,5692,5694,5709,7311,8323,10213	PFN1,PSMA2,PSMA5,PSMB2,PSMB4,PSMB6,PSMD3,UBA52,FZD6,PSMD14	10/63
6_Member	Reactome Gene Sets	R-HSA-68949	Orc1 removal from chromatin	-5.62606	-4.50334	5683,5686,5690,5692,5694,5709,7311,9978,10213	PSMA2,PSMA5,PSMB2,PSMB4,PSMB6,PSMD3,UBA52,RBX1,PSMD14	9/50
6_Member	Reactome Gene Sets	R-HSA-202424	Downstream TCR signaling	-5.59904	-4.49567	5683,5686,5690,5692,5694,5709,7311,8517,10213,23118	PSMA2,PSMA5,PSMB2,PSMB4,PSMB6,PSMD3,UBA52,IKBKG,PSMD14,TAB2	10/64
6_Member	Reactome Gene Sets	R-HSA-9013694	Signaling by NOTCH4	-5.59904	-4.49567	5683,5686,5690,5692,5694,5709,7311,9978,10213,23385	PSMA2,PSMA5,PSMB2,PSMB4,PSMB6,PSMD3,UBA52,RBX1,PSMD14,NCSTN	10/64
6_Member	Reactome Gene Sets	R-HSA-446652	Interleukin-1 family signaling	-5.57699	-4.47569	5604,5683,5686,5690,5692,5694,5709,7311,8517,9978,10213,23118,121457	MAP2K1,PSMA2,PSMA5,PSMB2,PSMB4,PSMB6,PSMD3,UBA52,IKBKG,RBX1,PSMD14,TAB2,IKBIP	13/112
6_Member	Reactome Gene Sets	R-HSA-174184	Cdc20:Phospho-APC/C mediated degradation of Cyclin A	-5.55091	-4.45169	5683,5686,5690,5692,5694,5709,7311,10213,10393	PSMA2,PSMA5,PSMB2,PSMB4,PSMB6,PSMD3,UBA52,PSMD14,ANAPC10	9/51
6_Member	Reactome Gene Sets	R-HSA-1168372	Downstream signaling events of B Cell Receptor (BCR)	-5.47754	-4.39209	5683,5686,5690,5692,5694,5709,7311,8517,10213	PSMA2,PSMA5,PSMB2,PSMB4,PSMB6,PSMD3,UBA52,IKBKG,PSMD14	9/52
6_Member	Reactome Gene Sets	R-HSA-1234174	Cellular response to hypoxia	-5.47754	-4.39209	5683,5686,5690,5692,5694,5709,7311,9978,10213	PSMA2,PSMA5,PSMB2,PSMB4,PSMB6,PSMD3,UBA52,RBX1,PSMD14	9/52
6_Member	Reactome Gene Sets	R-HSA-174178	APC/C:Cdh1 mediated degradation of Cdc20 and other APC/C:Cdh1 targeted proteins in late mitosis/early G1	-5.47754	-4.39209	5683,5686,5690,5692,5694,5709,7311,10213,10393	PSMA2,PSMA5,PSMB2,PSMB4,PSMB6,PSMD3,UBA52,PSMD14,ANAPC10	9/52
6_Member	Reactome Gene Sets	R-HSA-179419	APC:Cdc20 mediated degradation of cell cycle proteins prior to satisfation of the cell cycle checkpoint	-5.47754	-4.39209	5683,5686,5690,5692,5694,5709,7311,10213,10393	PSMA2,PSMA5,PSMB2,PSMB4,PSMB6,PSMD3,UBA52,PSMD14,ANAPC10	9/52
6_Member	Reactome Gene Sets	R-HSA-69017	CDK-mediated phosphorylation and removal of Cdc6	-5.47754	-4.39209	5683,5686,5690,5692,5694,5709,7311,10213,10393	PSMA2,PSMA5,PSMB2,PSMB4,PSMB6,PSMD3,UBA52,PSMD14,ANAPC10	9/52
6_Member	Reactome Gene Sets	R-HSA-5358351	Signaling by Hedgehog	-5.44743	-4.36444	5683,5686,5690,5692,5694,5709,7311,7415,9978,10213,10383,10956,27248	PSMA2,PSMA5,PSMB2,PSMB4,PSMB6,PSMD3,UBA52,VCP,RBX1,PSMD14,TUBB4B,OS9,ERLEC1	13/115
6_Member	Reactome Gene Sets	R-HSA-351202	Metabolism of polyamines	-5.42298	-4.34396	5683,5686,5690,5692,5694,5709,6723,10213	PSMA2,PSMA5,PSMB2,PSMB4,PSMB6,PSMD3,SRM,PSMD14	8/40
6_Member	Reactome Gene Sets	R-HSA-202403	TCR signaling	-5.37409	-4.30096	1445,5683,5686,5690,5692,5694,5709,7311,8517,10213,23118	CSK,PSMA2,PSMA5,PSMB2,PSMB4,PSMB6,PSMD3,UBA52,IKBKG,PSMD14,TAB2	11/83
6_Member	Reactome Gene Sets	R-HSA-69052	Switching of origins to a post-replicative state	-5.35284	-4.28164	5683,5686,5690,5692,5694,5709,7311,9978,10213,10393	PSMA2,PSMA5,PSMB2,PSMB4,PSMB6,PSMD3,UBA52,RBX1,PSMD14,ANAPC10	10/68
6_Member	Reactome Gene Sets	R-HSA-176409	APC/C:Cdc20 mediated degradation of mitotic proteins	-5.33588	-4.26662	5683,5686,5690,5692,5694,5709,7311,10213,10393	PSMA2,PSMA5,PSMB2,PSMB4,PSMB6,PSMD3,UBA52,PSMD14,ANAPC10	9/54
6_Member	Reactome Gene Sets	R-HSA-176814	Activation of APC/C and APC/C:Cdc20 mediated degradation of mitotic proteins	-5.26744	-4.20583	5683,5686,5690,5692,5694,5709,7311,10213,10393	PSMA2,PSMA5,PSMB2,PSMB4,PSMB6,PSMD3,UBA52,PSMD14,ANAPC10	9/55
6_Member	Reactome Gene Sets	R-HSA-8878166	Transcriptional regulation by RUNX2	-5.22141	-4.16346	5683,5686,5690,5692,5694,5709,7311,8841,9978,10213,10432	PSMA2,PSMA5,PSMB2,PSMB4,PSMB6,PSMD3,UBA52,HDAC3,RBX1,PSMD14,RBM14	11/86
6_Member	Reactome Gene Sets	R-HSA-1236978	Cross-presentation of soluble exogenous antigens (endosomes)	-5.18379	-4.13157	5683,5686,5690,5692,5694,5709,10213	PSMA2,PSMA5,PSMB2,PSMB4,PSMB6,PSMD3,PSMD14	7/31
6_Member	Reactome Gene Sets	R-HSA-187577	SCF(Skp2)-mediated degradation of p27/p21	-5.17475	-4.12438	5683,5686,5690,5692,5694,5709,7311,10213	PSMA2,PSMA5,PSMB2,PSMB4,PSMB6,PSMD3,UBA52,PSMD14	8/43
6_Member	Reactome Gene Sets	R-HSA-176408	Regulation of APC/C activators between G1/S and early anaphase	-5.13504	-4.08835	5683,5686,5690,5692,5694,5709,7311,10213,10393	PSMA2,PSMA5,PSMB2,PSMB4,PSMB6,PSMD3,UBA52,PSMD14,ANAPC10	9/57
6_Member	Reactome Gene Sets	R-HSA-5632684	Hedgehog 'on' state	-5.13504	-4.08835	5683,5686,5690,5692,5694,5709,7311,9978,10213	PSMA2,PSMA5,PSMB2,PSMB4,PSMB6,PSMD3,UBA52,RBX1,PSMD14	9/57
6_Member	Reactome Gene Sets	R-HSA-4608870	Asymmetric localization of PCP proteins	-5.09667	-4.05363	5683,5686,5690,5692,5694,5709,7311,10213	PSMA2,PSMA5,PSMB2,PSMB4,PSMB6,PSMD3,UBA52,PSMD14	8/44
6_Member	Reactome Gene Sets	R-HSA-350562	Regulation of ornithine decarboxylase (ODC)	-5.08553	-4.04611	5683,5686,5690,5692,5694,5709,10213	PSMA2,PSMA5,PSMB2,PSMB4,PSMB6,PSMD3,PSMD14	7/32
6_Member	Reactome Gene Sets	R-HSA-69563	p53-Dependent G1 DNA Damage Response	-4.94681	-3.92505	5683,5686,5690,5692,5694,5709,7311,10213	PSMA2,PSMA5,PSMB2,PSMB4,PSMB6,PSMD3,UBA52,PSMD14	8/46
6_Member	Reactome Gene Sets	R-HSA-69580	p53-Dependent G1/S DNA damage checkpoint	-4.94681	-3.92505	5683,5686,5690,5692,5694,5709,7311,10213	PSMA2,PSMA5,PSMB2,PSMB4,PSMB6,PSMD3,UBA52,PSMD14	8/46
6_Member	Reactome Gene Sets	R-HSA-8948751	Regulation of PTEN stability and activity	-4.94681	-3.92505	5683,5686,5690,5692,5694,5709,7311,10213	PSMA2,PSMA5,PSMB2,PSMB4,PSMB6,PSMD3,UBA52,PSMD14	8/46
6_Member	Reactome Gene Sets	R-HSA-5689603	UCH proteinases	-4.85926	-3.85279	3607,5683,5686,5690,5692,5694,5709,7311,8607,10213	FOXK2,PSMA2,PSMA5,PSMB2,PSMB4,PSMB6,PSMD3,UBA52,RUVBL1,PSMD14	10/77
6_Member	Reactome Gene Sets	R-HSA-9711123	Cellular response to chemical stress	-4.81829	-3.81515	318,2876,3163,5683,5686,5690,5692,5694,5709,7311,7415,8841,9973,9978,10213	NUDT2,GPX1,HMOX2,PSMA2,PSMA5,PSMB2,PSMB4,PSMB6,PSMD3,UBA52,VCP,HDAC3,CCS,RBX1,PSMD14	15/171
6_Member	Reactome Gene Sets	R-HSA-69615	G1/S DNA Damage Checkpoints	-4.80471	-3.80323	5683,5686,5690,5692,5694,5709,7311,10213	PSMA2,PSMA5,PSMB2,PSMB4,PSMB6,PSMD3,UBA52,PSMD14	8/48
6_Member	Reactome Gene Sets	R-HSA-174143	APC/C-mediated degradation of cell cycle proteins	-4.76988	-3.77168	5683,5686,5690,5692,5694,5709,7311,10213,10393	PSMA2,PSMA5,PSMB2,PSMB4,PSMB6,PSMD3,UBA52,PSMD14,ANAPC10	9/63
6_Member	Reactome Gene Sets	R-HSA-453276	Regulation of mitotic cell cycle	-4.76988	-3.77168	5683,5686,5690,5692,5694,5709,7311,10213,10393	PSMA2,PSMA5,PSMB2,PSMB4,PSMB6,PSMD3,UBA52,PSMD14,ANAPC10	9/63
6_Member	Reactome Gene Sets	R-HSA-201681	TCF dependent signaling in response to WNT	-4.76187	-3.76604	857,3014,3065,5528,5529,5683,5686,5690,5692,5694,5709,7311,8323,8607,9978,10213	CAV1,H2AX,HDAC1,PPP2R5D,PPP2R5E,PSMA2,PSMA5,PSMB2,PSMB4,PSMB6,PSMD3,UBA52,FZD6,RUVBL1,RBX1,PSMD14	16/194
6_Member	Reactome Gene Sets	R-HSA-5621481	C-type lectin receptors (CLRs)	-4.58882	-3.60986	5683,5686,5690,5692,5694,5709,7311,8517,9040,10213,23118	PSMA2,PSMA5,PSMB2,PSMB4,PSMB6,PSMD3,UBA52,IKBKG,UBE2M,PSMD14,TAB2	11/100
6_Member	Reactome Gene Sets	R-HSA-5610787	Hedgehog 'off' state	-4.56876	-3.59136	5683,5686,5690,5692,5694,5709,7311,9978,10213,10383	PSMA2,PSMA5,PSMB2,PSMB4,PSMB6,PSMD3,UBA52,RBX1,PSMD14,TUBB4B	10/83
6_Member	Reactome Gene Sets	R-HSA-9824272	Somitogenesis	-4.48818	-3.51235	5683,5686,5690,5692,5694,5709,10213	PSMA2,PSMA5,PSMB2,PSMB4,PSMB6,PSMD3,PSMD14	7/39
6_Member	Reactome Gene Sets	R-HSA-2454202	Fc epsilon receptor (FCERI) signaling	-4.47778	-3.5035	5683,5686,5690,5692,5694,5709,7311,8517,10213,23118	PSMA2,PSMA5,PSMB2,PSMB4,PSMB6,PSMD3,UBA52,IKBKG,PSMD14,TAB2	10/85
6_Member	Reactome Gene Sets	R-HSA-68867	Assembly of the pre-replicative complex	-4.46005	-3.48732	3014,3836,5683,5686,5690,5692,5694,5709,7311,10213,10393,23633	H2AX,KPNA1,PSMA2,PSMA5,PSMB2,PSMB4,PSMB6,PSMD3,UBA52,PSMD14,ANAPC10,KPNA6	12/122
6_Member	Reactome Gene Sets	R-HSA-1280218	Adaptive Immune System	-4.30924	-3.35318	642,811,1445,1778,2923,3309,3383,5528,5529,5683,5686,5690,5692,5694,5709,7311,7318,8517,9040,9246,9341,9978,10134,10213,10383,10393,11004,23118,55860,65264,79876,80028	BLMH,CALR,CSK,DYNC1H1,PDIA3,HSPA5,ICAM1,PPP2R5D,PPP2R5E,PSMA2,PSMA5,PSMB2,PSMB4,PSMB6,PSMD3,UBA52,UBA7,IKBKG,UBE2M,UBE2L6,VAMP3,RBX1,BCAP31,PSMD14,TUBB4B,ANAPC10,KIF2C,TAB2,ACTR10,UBE2Z,UBA5,FBXL18	32/627
6_Member	Reactome Gene Sets	R-HSA-9759194	Nuclear events mediated by NFE2L2	-4.29628	-3.3417	5683,5686,5690,5692,5694,5709,7311,9978,10213	PSMA2,PSMA5,PSMB2,PSMB4,PSMB6,PSMD3,UBA52,RBX1,PSMD14	9/72
6_Member	Reactome Gene Sets	R-HSA-5668541	TNFR2 non-canonical NF-kB pathway	-4.24826	-3.29811	5683,5686,5690,5692,5694,5709,7311,9040,10213	PSMA2,PSMA5,PSMB2,PSMB4,PSMB6,PSMD3,UBA52,UBE2M,PSMD14	9/73
6_Member	Reactome Gene Sets	R-HSA-983705	Signaling by the B Cell Receptor (BCR)	-4.24826	-3.29811	5683,5686,5690,5692,5694,5709,7311,8517,10213	PSMA2,PSMA5,PSMB2,PSMB4,PSMB6,PSMD3,UBA52,IKBKG,PSMD14	9/73
6_Member	Reactome Gene Sets	R-HSA-5688426	Deubiquitination	-4.15412	-3.21412	3607,5683,5686,5690,5692,5694,5709,5887,6881,7311,7415,7706,8517,8607,10213,51651,80124	FOXK2,PSMA2,PSMA5,PSMB2,PSMB4,PSMB6,PSMD3,RAD23B,TAF10,UBA52,VCP,TRIM25,IKBKG,RUVBL1,PSMD14,PTRH2,VCPIP1	17/241
6_Member	Reactome Gene Sets	R-HSA-983168	Antigen processing: Ubiquitination & Proteasome degradation	-4.10993	-3.17845	642,5683,5686,5690,5692,5694,5709,7311,7318,9040,9246,9978,10213,10393,65264,79876,80028	BLMH,PSMA2,PSMA5,PSMB2,PSMB4,PSMB6,PSMD3,UBA52,UBA7,UBE2M,UBE2L6,RBX1,PSMD14,ANAPC10,UBE2Z,UBA5,FBXL18	17/243
6_Member	Reactome Gene Sets	R-HSA-9755511	KEAP1-NFE2L2 pathway	-4.0998	-3.16972	5683,5686,5690,5692,5694,5709,7311,7415,9978,10213	PSMA2,PSMA5,PSMB2,PSMB4,PSMB6,PSMD3,UBA52,VCP,RBX1,PSMD14	10/94
6_Member	Reactome Gene Sets	R-HSA-1257604	PIP3 activates AKT signaling	-4.03049	-3.10677	391,572,2931,3065,5528,5529,5683,5686,5690,5692,5694,5709,7311,8841,10213	RHOG,BAD,GSK3A,HDAC1,PPP2R5D,PPP2R5E,PSMA2,PSMA5,PSMB2,PSMB4,PSMB6,PSMD3,UBA52,HDAC3,PSMD14	15/200
6_Member	Reactome Gene Sets	R-HSA-5673001	RAF/MAP kinase cascade	-4.00862	-3.08686	1445,5528,5529,5604,5683,5686,5690,5692,5694,5709,7311,8036,8315,8682,9978,10213	CSK,PPP2R5D,PPP2R5E,MAP2K1,PSMA2,PSMA5,PSMB2,PSMB4,PSMB6,PSMD3,UBA52,SHOC2,BRAP,PEA15,RBX1,PSMD14	16/224
6_Member	Reactome Gene Sets	R-HSA-5687128	MAPK6/MAPK4 signaling	-3.97892	-3.05854	5683,5686,5690,5692,5694,5709,7311,10213	PSMA2,PSMA5,PSMB2,PSMB4,PSMB6,PSMD3,UBA52,PSMD14	8/62
6_Member	Reactome Gene Sets	R-HSA-6807070	PTEN Regulation	-3.94648	-3.02883	3065,5683,5686,5690,5692,5694,5709,7311,8841,10213	HDAC1,PSMA2,PSMA5,PSMB2,PSMB4,PSMB6,PSMD3,UBA52,HDAC3,PSMD14	10/98
6_Member	Reactome Gene Sets	R-HSA-5684996	MAPK1/MAPK3 signaling	-3.94128	-3.02499	1445,5528,5529,5604,5683,5686,5690,5692,5694,5709,7311,8036,8315,8682,9978,10213	CSK,PPP2R5D,PPP2R5E,MAP2K1,PSMA2,PSMA5,PSMB2,PSMB4,PSMB6,PSMD3,UBA52,SHOC2,BRAP,PEA15,RBX1,PSMD14	16/227
6_Member	Reactome Gene Sets	R-HSA-69202	Cyclin E associated events during G1/S transition	-3.92896	-3.01538	5683,5686,5690,5692,5694,5709,7311,10213	PSMA2,PSMA5,PSMB2,PSMB4,PSMB6,PSMD3,UBA52,PSMD14	8/63
6_Member	Reactome Gene Sets	R-HSA-69656	Cyclin A:Cdk2-associated events at S phase entry	-3.83196	-2.92771	5683,5686,5690,5692,5694,5709,7311,10213	PSMA2,PSMA5,PSMB2,PSMB4,PSMB6,PSMD3,UBA52,PSMD14	8/65
6_Member	Reactome Gene Sets	R-HSA-8878159	Transcriptional regulation by RUNX3	-3.69328	-2.79298	5683,5686,5690,5692,5694,5709,7311,10213	PSMA2,PSMA5,PSMB2,PSMB4,PSMB6,PSMD3,UBA52,PSMD14	8/68
6_Member	Reactome Gene Sets	R-HSA-9793380	Formation of paraxial mesoderm	-3.6645	-2.76681	5683,5686,5690,5692,5694,5709,10213	PSMA2,PSMA5,PSMB2,PSMB4,PSMB6,PSMD3,PSMD14	7/52
6_Member	Reactome Gene Sets	R-HSA-3858494	Beta-catenin independent WNT signaling	-3.59657	-2.70018	5216,5683,5686,5690,5692,5694,5709,7311,8323,10213	PFN1,PSMA2,PSMA5,PSMB2,PSMB4,PSMB6,PSMD3,UBA52,FZD6,PSMD14	10/108
6_Member	Reactome Gene Sets	R-HSA-195721	Signaling by WNT	-3.5809	-2.6871	857,3014,3065,5216,5528,5529,5683,5686,5690,5692,5694,5709,7311,8323,8607,9978,10213	CAV1,H2AX,HDAC1,PFN1,PPP2R5D,PPP2R5E,PSMA2,PSMA5,PSMB2,PSMB4,PSMB6,PSMD3,UBA52,FZD6,RUVBL1,RBX1,PSMD14	17/269
6_Member	Reactome Gene Sets	R-HSA-157118	Signaling by NOTCH	-3.55892	-2.66769	3014,3065,5683,5686,5690,5692,5694,5709,7311,8841,9978,10213,23385,23509	H2AX,HDAC1,PSMA2,PSMA5,PSMB2,PSMB4,PSMB6,PSMD3,UBA52,HDAC3,RBX1,PSMD14,NCSTN,POFUT1	14/197
6_Member	Reactome Gene Sets	R-HSA-8878171	Transcriptional regulation by RUNX1	-3.41305	-2.53019	1021,3014,3065,5683,5686,5690,5692,5694,5709,6599,7311,10213,84661	CDK6,H2AX,HDAC1,PSMA2,PSMA5,PSMB2,PSMB4,PSMB6,PSMD3,SMARCC1,UBA52,PSMD14,DPY30	13/180
6_Member	Reactome Gene Sets	R-HSA-5683057	MAPK family signaling cascades	-3.33355	-2.45742	1445,5528,5529,5604,5683,5686,5690,5692,5694,5709,7311,8036,8315,8682,9978,10213	CSK,PPP2R5D,PPP2R5E,MAP2K1,PSMA2,PSMA5,PSMB2,PSMB4,PSMB6,PSMD3,UBA52,SHOC2,BRAP,PEA15,RBX1,PSMD14	16/257
6_Member	Reactome Gene Sets	R-HSA-9006925	Intracellular signaling by second messengers	-3.25415	-2.38048	391,572,2931,3065,5528,5529,5683,5686,5690,5692,5694,5709,7311,8841,10213	RHOG,BAD,GSK3A,HDAC1,PPP2R5D,PPP2R5E,PSMA2,PSMA5,PSMB2,PSMB4,PSMB6,PSMD3,UBA52,HDAC3,PSMD14	15/236
6_Member	Reactome Gene Sets	R-HSA-8939236	RUNX1 regulates transcription of genes involved in differentiation of HSCs	-3.20168	-2.33047	3014,5683,5686,5690,5692,5694,5709,7311,10213	H2AX,PSMA2,PSMA5,PSMB2,PSMB4,PSMB6,PSMD3,UBA52,PSMD14	9/100
6_Member	Reactome Gene Sets	R-HSA-5689880	Ub-specific processing proteases	-2.93291	-2.08896	5683,5686,5690,5692,5694,5709,6881,7311,8517,8607,10213,51651	PSMA2,PSMA5,PSMB2,PSMB4,PSMB6,PSMD3,TAF10,UBA52,IKBKG,RUVBL1,PSMD14,PTRH2	12/178
7_Summary	Reactome Gene Sets	R-HSA-6798695	Neutrophil degranulation	-12.4547	-10.6767	197,353,391,1476,1727,1778,2717,2799,2992,3163,3326,3615,4282,4860,5036,5683,5686,5709,5836,5869,5878,5912,7415,8621,9342,9761,9961,10097,10213,10383,10493,11333,23071,23197,23317,23385,29099,55276,55860,80142	AHSG,APRT,RHOG,CSTB,CYB5R3,DYNC1H1,GLA,GNS,GYG1,HMOX2,HSP90AB1,IMPDH2,MIF,PNP,PA2G4,PSMA2,PSMA5,PSMD3,PYGL,RAB5B,RAB5C,RAP2B,VCP,CDK13,SNAP29,MLEC,MVP,ACTR2,PSMD14,TUBB4B,VAT1,PDAP1,ERP44,FAF2,DNAJC13,NCSTN,COMMD9,PGM2,ACTR10,PTGES2	40/-
7_Member	Reactome Gene Sets	R-HSA-6798695	Neutrophil degranulation	-12.4547	-10.6767	197,353,391,1476,1727,1778,2717,2799,2992,3163,3326,3615,4282,4860,5036,5683,5686,5709,5836,5869,5878,5912,7415,8621,9342,9761,9961,10097,10213,10383,10493,11333,23071,23197,23317,23385,29099,55276,55860,80142	AHSG,APRT,RHOG,CSTB,CYB5R3,DYNC1H1,GLA,GNS,GYG1,HMOX2,HSP90AB1,IMPDH2,MIF,PNP,PA2G4,PSMA2,PSMA5,PSMD3,PYGL,RAB5B,RAB5C,RAP2B,VCP,CDK13,SNAP29,MLEC,MVP,ACTR2,PSMD14,TUBB4B,VAT1,PDAP1,ERP44,FAF2,DNAJC13,NCSTN,COMMD9,PGM2,ACTR10,PTGES2	40/435
8_Summary	Reactome Gene Sets	R-HSA-6781827	Transcription-Coupled Nucleotide Excision Repair (TC-NER)	-12.2103	-10.4609	1642,5111,5438,5441,5983,5984,6117,6118,7311,7515,8533,9318,9978,10980,27339,54107,56949,5887,8607,7318,7415,7706,9246,3014,5531,10111,51588,1025,2962,2963,3065,5300,5562,6827,6881,7532,7533,8148,8621,11198,85456,51659,10856,3326	DDB1,PCNA,POLR2I,POLR2L,RFC3,RFC4,RPA1,RPA2,UBA52,XRCC1,COPS3,COPS2,RBX1,COPS6,PRPF19,POLE3,XAB2,RAD23B,RUVBL1,UBA7,VCP,TRIM25,UBE2L6,H2AX,PPP4C,RAD50,PIAS4,CDK9,GTF2F1,GTF2F2,HDAC1,PIN1,PRKAA1,SUPT4H1,TAF10,YWHAG,YWHAH,TAF15,CDK13,SUPT16H,TNKS1BP1,GINS2,RUVBL2,HSP90AB1	44/-
8_Member	Reactome Gene Sets	R-HSA-6781827	Transcription-Coupled Nucleotide Excision Repair (TC-NER)	-12.2103	-10.4609	1642,5111,5438,5441,5983,5984,6117,6118,7311,7515,8533,9318,9978,10980,27339,54107,56949	DDB1,PCNA,POLR2I,POLR2L,RFC3,RFC4,RPA1,RPA2,UBA52,XRCC1,COPS3,COPS2,RBX1,COPS6,PRPF19,POLE3,XAB2	17/71
8_Member	Reactome Gene Sets	R-HSA-5696398	Nucleotide Excision Repair	-11.7183	-10.0528	1642,5111,5438,5441,5887,5983,5984,6117,6118,7311,7515,8533,8607,9318,9978,10980,27339,54107,56949	DDB1,PCNA,POLR2I,POLR2L,RAD23B,RFC3,RFC4,RPA1,RPA2,UBA52,XRCC1,COPS3,RUVBL1,COPS2,RBX1,COPS6,PRPF19,POLE3,XAB2	19/99
8_Member	Reactome Gene Sets	R-HSA-73893	DNA Damage Bypass	-10.3466	-8.75771	1642,5111,5983,5984,6117,6118,7311,7318,7415,7706,9246,9978,54107	DDB1,PCNA,RFC3,RFC4,RPA1,RPA2,UBA52,UBA7,VCP,TRIM25,UBE2L6,RBX1,POLE3	13/47
8_Member	Reactome Gene Sets	R-HSA-6782210	Gap-filling DNA repair synthesis and ligation in TC-NER	-10.2179	-8.65377	1642,5111,5438,5441,5983,5984,6117,6118,7311,7515,9978,27339,54107,56949	DDB1,PCNA,POLR2I,POLR2L,RFC3,RFC4,RPA1,RPA2,UBA52,XRCC1,RBX1,PRPF19,POLE3,XAB2	14/58
8_Member	Reactome Gene Sets	R-HSA-5696399	Global Genome Nucleotide Excision Repair (GG-NER)	-9.48289	-7.96994	1642,5111,5887,5983,5984,6117,6118,7311,7515,8533,8607,9318,9978,10980,54107	DDB1,PCNA,RAD23B,RFC3,RFC4,RPA1,RPA2,UBA52,XRCC1,COPS3,RUVBL1,COPS2,RBX1,COPS6,POLE3	15/77
8_Member	Reactome Gene Sets	R-HSA-110313	Translesion synthesis by Y family DNA polymerases bypasses lesions on DNA template	-9.08157	-7.58441	5111,5983,5984,6117,6118,7311,7318,7415,7706,9246,54107	PCNA,RFC3,RFC4,RPA1,RPA2,UBA52,UBA7,VCP,TRIM25,UBE2L6,POLE3	11/38
8_Member	Reactome Gene Sets	R-HSA-6782135	Dual incision in TC-NER	-9.00123	-7.50921	1642,5111,5438,5441,5983,5984,6117,6118,7311,9978,27339,54107,56949	DDB1,PCNA,POLR2I,POLR2L,RFC3,RFC4,RPA1,RPA2,UBA52,RBX1,PRPF19,POLE3,XAB2	13/59
8_Member	Reactome Gene Sets	R-HSA-73894	DNA Repair	-8.85703	-7.37511	1642,3014,5111,5438,5441,5531,5887,5983,5984,6117,6118,7311,7318,7415,7515,7706,8533,8607,9246,9318,9978,10111,10980,27339,51588,54107,56949	DDB1,H2AX,PCNA,POLR2I,POLR2L,PPP4C,RAD23B,RFC3,RFC4,RPA1,RPA2,UBA52,UBA7,VCP,XRCC1,TRIM25,COPS3,RUVBL1,UBE2L6,COPS2,RBX1,RAD50,COPS6,PRPF19,PIAS4,POLE3,XAB2	27/286
8_Member	Reactome Gene Sets	R-HSA-5656169	Termination of translesion DNA synthesis	-8.82635	-7.34939	5111,5983,5984,6117,6118,7311,7318,7706,9246,54107	PCNA,RFC3,RFC4,RPA1,RPA2,UBA52,UBA7,TRIM25,UBE2L6,POLE3	10/31
8_Member	Reactome Gene Sets	R-HSA-110314	Recognition of DNA damage by PCNA-containing replication complex	-7.83118	-6.43505	1642,5111,5983,5984,6117,6118,7311,9978,54107	DDB1,PCNA,RFC3,RFC4,RPA1,RPA2,UBA52,RBX1,POLE3	9/29
8_Member	Reactome Gene Sets	R-HSA-5696397	Gap-filling DNA repair synthesis and ligation in GG-NER	-7.46383	-6.09161	5111,5983,5984,6117,6118,7311,7515,54107	PCNA,RFC3,RFC4,RPA1,RPA2,UBA52,XRCC1,POLE3	8/23
8_Member	Reactome Gene Sets	R-HSA-110320	Translesion Synthesis by POLH	-6.98434	-5.67349	5111,5983,5984,6117,6118,7311,7415	PCNA,RFC3,RFC4,RPA1,RPA2,UBA52,VCP	7/18
8_Member	Reactome Gene Sets	R-HSA-6781823	Formation of TC-NER Pre-Incision Complex	-6.7257	-5.44414	1642,5438,5441,7311,8533,9318,9978,10980,27339,56949	DDB1,POLR2I,POLR2L,UBA52,COPS3,COPS2,RBX1,COPS6,PRPF19,XAB2	10/49
8_Member	Reactome Gene Sets	R-HSA-5696400	Dual Incision in GG-NER	-6.70248	-5.43333	1642,5111,5983,5984,6117,6118,7311,9978,54107	DDB1,PCNA,RFC3,RFC4,RPA1,RPA2,UBA52,RBX1,POLE3	9/38
8_Member	Reactome Gene Sets	R-HSA-3700989	Transcriptional Regulation by TP53	-6.29632	-5.07354	1025,2962,2963,3065,5111,5300,5438,5441,5562,5983,5984,6117,6118,6827,6881,7311,7532,7533,8148,8621,10111,11198,85456	CDK9,GTF2F1,GTF2F2,HDAC1,PCNA,PIN1,POLR2I,POLR2L,PRKAA1,RFC3,RFC4,RPA1,RPA2,SUPT4H1,TAF10,UBA52,YWHAG,YWHAH,TAF15,CDK13,RAD50,SUPT16H,TNKS1BP1	23/289
8_Member	Reactome Gene Sets	R-HSA-110312	Translesion synthesis by REV1	-6.13947	-4.93022	5111,5983,5984,6117,6118,7311	PCNA,RFC3,RFC4,RPA1,RPA2,UBA52	6/15
8_Member	Reactome Gene Sets	R-HSA-5655862	Translesion synthesis by POLK	-5.94416	-4.77069	5111,5983,5984,6117,6118,7311	PCNA,RFC3,RFC4,RPA1,RPA2,UBA52	6/16
8_Member	Reactome Gene Sets	R-HSA-5656121	Translesion synthesis by POLI	-5.94416	-4.77069	5111,5983,5984,6117,6118,7311	PCNA,RFC3,RFC4,RPA1,RPA2,UBA52	6/16
8_Member	Reactome Gene Sets	R-HSA-5696394	DNA Damage Recognition in GG-NER	-5.79174	-4.64446	1642,5887,7311,8533,8607,9318,9978,10980	DDB1,RAD23B,UBA52,COPS3,RUVBL1,COPS2,RBX1,COPS6	8/36
8_Member	Reactome Gene Sets	R-HSA-6804756	Regulation of TP53 Activity through Phosphorylation	-5.47978	-4.39209	5300,5562,5983,5984,6117,6118,6881,7311,8148,10111,11198	PIN1,PRKAA1,RFC3,RFC4,RPA1,RPA2,TAF10,UBA52,TAF15,RAD50,SUPT16H	11/81
8_Member	Reactome Gene Sets	R-HSA-5651801	PCNA-Dependent Long Patch Base Excision Repair	-5.2945	-4.231	5111,5983,5984,6117,6118,54107	PCNA,RFC3,RFC4,RPA1,RPA2,POLE3	6/20
8_Member	Reactome Gene Sets	R-HSA-73933	Resolution of Abasic Sites (AP sites)	-5.08553	-4.04611	5111,5983,5984,6117,6118,7515,54107	PCNA,RFC3,RFC4,RPA1,RPA2,XRCC1,POLE3	7/32
8_Member	Reactome Gene Sets	R-HSA-110373	Resolution of AP sites via the multiple-nucleotide patch replacement pathway	-4.67859	-3.69172	5111,5983,5984,6117,6118,54107	PCNA,RFC3,RFC4,RPA1,RPA2,POLE3	6/25
8_Member	Reactome Gene Sets	R-HSA-5693538	Homology Directed Repair	-4.42479	-3.45667	3014,5111,5531,5983,5984,6117,6118,7311,7515,10111,51588,54107	H2AX,PCNA,PPP4C,RFC3,RFC4,RPA1,RPA2,UBA52,XRCC1,RAD50,PIAS4,POLE3	12/123
8_Member	Reactome Gene Sets	R-HSA-5633007	Regulation of TP53 Activity	-4.28745	-3.33436	3065,5300,5562,5983,5984,6117,6118,6881,7311,8148,10111,11198	HDAC1,PIN1,PRKAA1,RFC3,RFC4,RPA1,RPA2,TAF10,UBA52,TAF15,RAD50,SUPT16H	12/127
8_Member	Reactome Gene Sets	R-HSA-69190	DNA strand elongation	-4.19701	-3.25414	5111,5983,5984,6117,6118,51659	PCNA,RFC3,RFC4,RPA1,RPA2,GINS2	6/30
8_Member	Reactome Gene Sets	R-HSA-69186	Lagging Strand Synthesis	-4.18592	-3.24448	5111,5983,5984,6117,6118	PCNA,RFC3,RFC4,RPA1,RPA2	5/19
8_Member	Reactome Gene Sets	R-HSA-180786	Extension of Telomeres	-4.07179	-3.1459	5111,5983,5984,6117,6118,8607,10856	PCNA,RFC3,RFC4,RPA1,RPA2,RUVBL1,RUVBL2	7/45
8_Member	Reactome Gene Sets	R-HSA-5685942	HDR through Homologous Recombination (HRR)	-4.0299	-3.10677	5111,5983,5984,6117,6118,7311,10111,54107	PCNA,RFC3,RFC4,RPA1,RPA2,UBA52,RAD50,POLE3	8/61
8_Member	Reactome Gene Sets	R-HSA-5693567	HDR through Homologous Recombination (HRR) or Single Strand Annealing (SSA)	-3.89297	-2.98098	3014,5111,5531,5983,5984,6117,6118,7311,10111,51588,54107	H2AX,PCNA,PPP4C,RFC3,RFC4,RPA1,RPA2,UBA52,RAD50,PIAS4,POLE3	11/119
8_Member	Reactome Gene Sets	R-HSA-69473	G2/M DNA damage checkpoint	-3.89188	-2.98098	3014,5983,5984,6117,6118,7532,7533,10111,51588	H2AX,RFC3,RFC4,RPA1,RPA2,YWHAG,YWHAH,RAD50,PIAS4	9/81
8_Member	Reactome Gene Sets	R-HSA-3371511	HSF1 activation	-3.87528	-2.96839	3326,6117,6118,7415	HSP90AB1,RPA1,RPA2,VCP	4/12
8_Member	Reactome Gene Sets	R-HSA-5693532	DNA Double-Strand Break Repair	-3.79113	-2.88821	3014,5111,5531,5983,5984,6117,6118,7311,7515,10111,51588,54107	H2AX,PCNA,PPP4C,RFC3,RFC4,RPA1,RPA2,UBA52,XRCC1,RAD50,PIAS4,POLE3	12/143
8_Member	Reactome Gene Sets	R-HSA-157579	Telomere Maintenance	-3.69691	-2.7953	3014,5111,5438,5441,5983,5984,6117,6118,8607,10856	H2AX,PCNA,POLR2I,POLR2L,RFC3,RFC4,RPA1,RPA2,RUVBL1,RUVBL2	10/105
8_Member	Reactome Gene Sets	R-HSA-5693607	Processing of DNA double-strand break ends	-3.69121	-2.79222	3014,5531,5983,5984,6117,6118,7311,10111,51588	H2AX,PPP4C,RFC3,RFC4,RPA1,RPA2,UBA52,RAD50,PIAS4	9/86
8_Member	Reactome Gene Sets	R-HSA-5696395	Formation of Incision Complex in GG-NER	-3.5357	-2.64701	1642,5887,6117,6118,7311,9978	DDB1,RAD23B,RPA1,RPA2,UBA52,RBX1	6/39
8_Member	Reactome Gene Sets	R-HSA-5685938	HDR through Single Strand Annealing (SSA)	-3.41256	-2.53019	5983,5984,6117,6118,10111	RFC3,RFC4,RPA1,RPA2,RAD50	5/27
8_Member	Reactome Gene Sets	R-HSA-9709570	Impaired BRCA2 binding to RAD51	-3.41256	-2.53019	5983,5984,6117,6118,10111	RFC3,RFC4,RPA1,RPA2,RAD50	5/27
8_Member	Reactome Gene Sets	R-HSA-174417	Telomere C-strand (Lagging Strand) Synthesis	-3.26193	-2.38703	5111,5983,5984,6117,6118	PCNA,RFC3,RFC4,RPA1,RPA2	5/29
8_Member	Reactome Gene Sets	R-HSA-73884	Base Excision Repair	-3.13584	-2.27311	3014,5111,5983,5984,6117,6118,7515,54107	H2AX,PCNA,RFC3,RFC4,RPA1,RPA2,XRCC1,POLE3	8/82
8_Member	Reactome Gene Sets	R-HSA-5693616	Presynaptic phase of homologous DNA pairing and strand exchange	-3.05802	-2.20361	5983,5984,6117,6118,10111	RFC3,RFC4,RPA1,RPA2,RAD50	5/32
8_Member	Reactome Gene Sets	R-HSA-9675136	Diseases of DNA Double-Strand Break Repair	-3.05802	-2.20361	5983,5984,6117,6118,10111	RFC3,RFC4,RPA1,RPA2,RAD50	5/32
8_Member	Reactome Gene Sets	R-HSA-9701190	Defective homologous recombination repair (HRR) due to BRCA2 loss of function	-3.05802	-2.20361	5983,5984,6117,6118,10111	RFC3,RFC4,RPA1,RPA2,RAD50	5/32
8_Member	Reactome Gene Sets	R-HSA-73886	Chromosome Maintenance	-3.0379	-2.18466	3014,5111,5438,5441,5983,5984,6117,6118,8607,10856	H2AX,PCNA,POLR2I,POLR2L,RFC3,RFC4,RPA1,RPA2,RUVBL1,RUVBL2	10/127
8_Member	Reactome Gene Sets	R-HSA-5693579	Homologous DNA Pairing and Strand Exchange	-2.93452	-2.08942	5983,5984,6117,6118,10111	RFC3,RFC4,RPA1,RPA2,RAD50	5/34
8_Member	Reactome Gene Sets	R-HSA-9675135	Diseases of DNA repair	-2.51675	-1.70915	5983,5984,6117,6118,10111	RFC3,RFC4,RPA1,RPA2,RAD50	5/42
8_Member	Reactome Gene Sets	R-HSA-5358565	Mismatch repair (MMR) directed by MSH2:MSH6 (MutSalpha)	-2.49785	-1.69863	5111,6117,6118	PCNA,RPA1,RPA2	3/13
8_Member	Reactome Gene Sets	R-HSA-5358606	Mismatch repair (MMR) directed by MSH2:MSH3 (MutSbeta)	-2.49785	-1.69863	5111,6117,6118	PCNA,RPA1,RPA2	3/13
8_Member	Reactome Gene Sets	R-HSA-69091	Polymerase switching	-2.49785	-1.69863	5111,5983,5984	PCNA,RFC3,RFC4	3/13
8_Member	Reactome Gene Sets	R-HSA-69109	Leading Strand Synthesis	-2.49785	-1.69863	5111,5983,5984	PCNA,RFC3,RFC4	3/13
8_Member	Reactome Gene Sets	R-HSA-174437	Removal of the Flap Intermediate from the C-strand	-2.40078	-1.61883	5111,6117,6118	PCNA,RPA1,RPA2	3/14
8_Member	Reactome Gene Sets	R-HSA-5358508	Mismatch Repair	-2.40078	-1.61883	5111,6117,6118	PCNA,RPA1,RPA2	3/14
8_Member	Reactome Gene Sets	R-HSA-69166	Removal of the Flap Intermediate	-2.40078	-1.61883	5111,6117,6118	PCNA,RPA1,RPA2	3/14
8_Member	Reactome Gene Sets	R-HSA-69183	Processive synthesis on the lagging strand	-2.31153	-1.54619	5111,6117,6118	PCNA,RPA1,RPA2	3/15
8_Member	Reactome Gene Sets	R-HSA-174414	Processive synthesis on the C-strand of the telomere	-2.229	-1.47287	5111,6117,6118	PCNA,RPA1,RPA2	3/16
8_Member	Reactome Gene Sets	R-HSA-176187	Activation of ATR in response to replication stress	-2.12909	-1.38251	5983,5984,6117,6118	RFC3,RFC4,RPA1,RPA2	4/33
9_Summary	Reactome Gene Sets	R-HSA-194315	Signaling by Rho GTPases	-11.8539	-10.1485	391,857,1445,1629,1778,2185,3014,3163,3326,3998,4001,4628,4722,5216,5300,5528,5529,6472,7415,7532,7533,9183,9318,9341,10097,10134,10383,10552,10726,11004,11140,11180,23075,23197,23279,26286,29062,30851,51566,54821,54874,55920,63916,84681,157285,222584,348995	RHOG,CAV1,CSK,DBT,DYNC1H1,PTK2B,H2AX,HMOX2,HSP90AB1,LMAN1,LMNB1,MYH10,NDUFS3,PFN1,PIN1,PPP2R5D,PPP2R5E,SHMT2,VCP,YWHAG,YWHAH,ZW10,COPS2,VAMP3,ACTR2,BCAP31,TUBB4B,ARPC1A,NUDC,KIF2C,CDC37,WDR6,SWAP70,FAF2,NUP160,ARFGAP3,WDR91,TAX1BP3,ARMCX3,ERCC6L,FNBP1L,RCC2,ELMO2,HINT2,PRAG1,FAM83B,NUP43	47/-
9_Member	Reactome Gene Sets	R-HSA-194315	Signaling by Rho GTPases	-11.8539	-10.1485	391,857,1445,1629,1778,2185,3014,3163,3326,3998,4001,4628,4722,5216,5300,5528,5529,6472,7415,7532,7533,9183,9318,9341,10097,10134,10383,10552,10726,11004,11140,11180,23075,23197,23279,26286,29062,30851,51566,54821,54874,55920,63916,84681,157285,222584,348995	RHOG,CAV1,CSK,DBT,DYNC1H1,PTK2B,H2AX,HMOX2,HSP90AB1,LMAN1,LMNB1,MYH10,NDUFS3,PFN1,PIN1,PPP2R5D,PPP2R5E,SHMT2,VCP,YWHAG,YWHAH,ZW10,COPS2,VAMP3,ACTR2,BCAP31,TUBB4B,ARPC1A,NUDC,KIF2C,CDC37,WDR6,SWAP70,FAF2,NUP160,ARFGAP3,WDR91,TAX1BP3,ARMCX3,ERCC6L,FNBP1L,RCC2,ELMO2,HINT2,PRAG1,FAM83B,NUP43	47/605
9_Member	Reactome Gene Sets	R-HSA-9716542	Signaling by Rho GTPases, Miro GTPases and RHOBTB3	-11.5035	-9.8455	391,857,1445,1629,1778,2185,3014,3163,3326,3998,4001,4628,4722,5216,5300,5528,5529,6472,7415,7532,7533,9183,9318,9341,10097,10134,10383,10552,10726,11004,11140,11180,23075,23197,23279,26286,29062,30851,51566,54821,54874,55920,63916,84681,157285,222584,348995	RHOG,CAV1,CSK,DBT,DYNC1H1,PTK2B,H2AX,HMOX2,HSP90AB1,LMAN1,LMNB1,MYH10,NDUFS3,PFN1,PIN1,PPP2R5D,PPP2R5E,SHMT2,VCP,YWHAG,YWHAH,ZW10,COPS2,VAMP3,ACTR2,BCAP31,TUBB4B,ARPC1A,NUDC,KIF2C,CDC37,WDR6,SWAP70,FAF2,NUP160,ARFGAP3,WDR91,TAX1BP3,ARMCX3,ERCC6L,FNBP1L,RCC2,ELMO2,HINT2,PRAG1,FAM83B,NUP43	47/619
9_Member	Reactome Gene Sets	R-HSA-9012999	RHO GTPase cycle	-6.77808	-5.48698	391,857,1445,1629,2185,3163,3326,3998,4001,4722,6472,7415,9318,9341,10134,10726,11140,11180,23075,23197,26286,29062,51566,54874,63916,84681,157285,222584	RHOG,CAV1,CSK,DBT,PTK2B,HMOX2,HSP90AB1,LMAN1,LMNB1,NDUFS3,SHMT2,VCP,COPS2,VAMP3,BCAP31,NUDC,CDC37,WDR6,SWAP70,FAF2,ARFGAP3,WDR91,ARMCX3,FNBP1L,ELMO2,HINT2,PRAG1,FAM83B	28/382
10_Summary	Reactome Gene Sets	R-HSA-159236	Transport of Mature mRNA derived from an Intron-Containing Transcript	-11.7303	-10.0528	4686,6427,6428,6430,6431,8683,9688,10189,10212,10482,23279,23511,23636,84324,129401,348995,1477,1479,6634	NCBP1,SRSF2,SRSF3,SRSF5,SRSF6,SRSF9,NUP93,ALYREF,DDX39A,NXF1,NUP160,NUP188,NUP62,SARNP,NUP35,NUP43,CSTF1,CSTF3,SNRPD3	19/-
10_Member	Reactome Gene Sets	R-HSA-159236	Transport of Mature mRNA derived from an Intron-Containing Transcript	-11.7303	-10.0528	4686,6427,6428,6430,6431,8683,9688,10189,10212,10482,23279,23511,23636,84324,129401,348995	NCBP1,SRSF2,SRSF3,SRSF5,SRSF6,SRSF9,NUP93,ALYREF,DDX39A,NXF1,NUP160,NUP188,NUP62,SARNP,NUP35,NUP43	16/65
10_Member	Reactome Gene Sets	R-HSA-72202	Transport of Mature Transcript to Cytoplasm	-10.9943	-9.37222	4686,6427,6428,6430,6431,8683,9688,10189,10212,10482,23279,23511,23636,84324,129401,348995	NCBP1,SRSF2,SRSF3,SRSF5,SRSF6,SRSF9,NUP93,ALYREF,DDX39A,NXF1,NUP160,NUP188,NUP62,SARNP,NUP35,NUP43	16/72
10_Member	Reactome Gene Sets	R-HSA-73856	RNA Polymerase II Transcription Termination	-8.11498	-6.69454	1477,1479,4686,6427,6428,6430,6431,6634,8683,10189,10212,84324	CSTF1,CSTF3,NCBP1,SRSF2,SRSF3,SRSF5,SRSF6,SNRPD3,SRSF9,ALYREF,DDX39A,SARNP	12/57
10_Member	Reactome Gene Sets	R-HSA-72187	mRNA 3'-end processing	-7.80047	-6.40841	1477,1479,4686,6427,6428,6430,6431,8683,10189,10212,84324	CSTF1,CSTF3,NCBP1,SRSF2,SRSF3,SRSF5,SRSF6,SRSF9,ALYREF,DDX39A,SARNP	11/49
11_Summary	Reactome Gene Sets	R-HSA-1169410	Antiviral mechanism by IFN-stimulated genes	-11.4645	-9.81908	1660,1965,1973,3305,3836,5300,5610,6059,7311,7318,7706,8517,9246,9688,10383,23279,23511,23636,129401,348995,2288,3309,3313,3326,6117,6118,7415,9531,10808,3383,3664,6773,4686,6632,6634,25929,50628,10189,10482,2962,2963,5438,5441,3065,5111,5885,6294,7150,11315,23468,51588,4001,8815,27243,128866,669,2582,2584,2799,2992,3098,5528,5836,6448,9061,10007,25796,51181,55276,283871,347734,91754,10556,11260,…	DHX9,EIF2S1,EIF4A1,HSPA1L,KPNA1,PIN1,EIF2AK2,ABCE1,UBA52,UBA7,TRIM25,IKBKG,UBE2L6,NUP93,TUBB4B,NUP160,NUP188,NUP62,NUP35,NUP43,FKBP4,HSPA5,HSPA9,HSP90AB1,RPA1,RPA2,VCP,BAG3,HSPH1,ICAM1,IRF6,STAT2,NCBP1,SNRPD1,SNRPD3,GEMIN5,GEMIN4,ALYREF,NXF1,GTF2F1,GTF2F2,POLR2I,POLR2L,HDAC1,PCNA,RAD21,SAFB,TOP1,PARK7,CBX5,PIAS4,LMNB1,BANF1,CHMP2A,CHMP4B,BPGM,GALE,GALK1,GNS,GYG1,HK1,PPP2R5D,PYGL,SGSH,PAPSS1,GNPDA…	83/-
11_Member	Reactome Gene Sets	R-HSA-1169410	Antiviral mechanism by IFN-stimulated genes	-11.4645	-9.81908	1660,1965,1973,3305,3836,5300,5610,6059,7311,7318,7706,8517,9246,9688,10383,23279,23511,23636,129401,348995	DHX9,EIF2S1,EIF4A1,HSPA1L,KPNA1,PIN1,EIF2AK2,ABCE1,UBA52,UBA7,TRIM25,IKBKG,UBE2L6,NUP93,TUBB4B,NUP160,NUP188,NUP62,NUP35,NUP43	20/115
11_Member	Reactome Gene Sets	R-HSA-3371556	Cellular response to heat stress	-10.4307	-8.8353	2288,3305,3309,3313,3326,6117,6118,7415,9531,9688,10808,23279,23511,23636,129401,348995	FKBP4,HSPA1L,HSPA5,HSPA9,HSP90AB1,RPA1,RPA2,VCP,BAG3,NUP93,HSPH1,NUP160,NUP188,NUP62,NUP35,NUP43	16/78
11_Member	Reactome Gene Sets	R-HSA-1169408	ISG15 antiviral mechanism	-10.2179	-8.65377	1973,3836,5300,5610,7311,7318,7706,9246,9688,23279,23511,23636,129401,348995	EIF4A1,KPNA1,PIN1,EIF2AK2,UBA52,UBA7,TRIM25,UBE2L6,NUP93,NUP160,NUP188,NUP62,NUP35,NUP43	14/58
11_Member	Reactome Gene Sets	R-HSA-913531	Interferon Signaling	-8.92326	-7.43632	1660,1965,1973,3305,3309,3383,3664,3836,5300,5610,6059,6773,7311,7318,7706,8517,9246,9688,10383,23279,23511,23636,129401,348995	DHX9,EIF2S1,EIF4A1,HSPA1L,HSPA5,ICAM1,IRF6,KPNA1,PIN1,EIF2AK2,ABCE1,STAT2,UBA52,UBA7,TRIM25,IKBKG,UBE2L6,NUP93,TUBB4B,NUP160,NUP188,NUP62,NUP35,NUP43	24/227
11_Member	Reactome Gene Sets	R-HSA-3371453	Regulation of HSF1-mediated heat shock response	-8.81	-7.33795	3305,3309,3313,6117,6118,9531,9688,10808,23279,23511,23636,129401,348995	HSPA1L,HSPA5,HSPA9,RPA1,RPA2,BAG3,NUP93,HSPH1,NUP160,NUP188,NUP62,NUP35,NUP43	13/61
11_Member	Reactome Gene Sets	R-HSA-191859	snRNP Assembly	-8.11166	-6.69454	4686,6632,6634,9688,23279,23511,23636,25929,50628,129401,348995	NCBP1,SNRPD1,SNRPD3,NUP93,NUP160,NUP188,NUP62,GEMIN5,GEMIN4,NUP35,NUP43	11/46
11_Member	Reactome Gene Sets	R-HSA-194441	Metabolism of non-coding RNA	-8.11166	-6.69454	4686,6632,6634,9688,23279,23511,23636,25929,50628,129401,348995	NCBP1,SNRPD1,SNRPD3,NUP93,NUP160,NUP188,NUP62,GEMIN5,GEMIN4,NUP35,NUP43	11/46
11_Member	Reactome Gene Sets	R-HSA-159227	Transport of the SLBP independent Mature mRNA	-7.83118	-6.43505	4686,9688,10189,10482,23279,23511,23636,129401,348995	NCBP1,NUP93,ALYREF,NXF1,NUP160,NUP188,NUP62,NUP35,NUP43	9/29
11_Member	Reactome Gene Sets	R-HSA-159230	Transport of the SLBP Dependant Mature mRNA	-7.68549	-6.30148	4686,9688,10189,10482,23279,23511,23636,129401,348995	NCBP1,NUP93,ALYREF,NXF1,NUP160,NUP188,NUP62,NUP35,NUP43	9/30
11_Member	Reactome Gene Sets	R-HSA-168325	Viral Messenger RNA Synthesis	-7.6287	-6.24866	2962,2963,5438,5441,9688,23279,23511,23636,129401,348995	GTF2F1,GTF2F2,POLR2I,POLR2L,NUP93,NUP160,NUP188,NUP62,NUP35,NUP43	10/40
11_Member	Reactome Gene Sets	R-HSA-3108232	SUMO E3 ligases SUMOylate target proteins	-7.29994	-5.94669	3065,5111,5610,5885,6117,6294,7150,8517,9688,11315,23279,23468,23511,23636,51588,129401,348995	HDAC1,PCNA,EIF2AK2,RAD21,RPA1,SAFB,TOP1,IKBKG,NUP93,PARK7,NUP160,CBX5,NUP188,NUP62,PIAS4,NUP35,NUP43	17/142
11_Member	Reactome Gene Sets	R-HSA-159231	Transport of Mature mRNA Derived from an Intronless Transcript	-7.03824	-5.71717	4686,9688,10189,10482,23279,23511,23636,129401,348995	NCBP1,NUP93,ALYREF,NXF1,NUP160,NUP188,NUP62,NUP35,NUP43	9/35
11_Member	Reactome Gene Sets	R-HSA-2990846	SUMOylation	-7.03339	-5.71576	3065,5111,5610,5885,6117,6294,7150,8517,9688,11315,23279,23468,23511,23636,51588,129401,348995	HDAC1,PCNA,EIF2AK2,RAD21,RPA1,SAFB,TOP1,IKBKG,NUP93,PARK7,NUP160,CBX5,NUP188,NUP62,PIAS4,NUP35,NUP43	17/148
11_Member	Reactome Gene Sets	R-HSA-159234	Transport of Mature mRNAs Derived from Intronless Transcripts	-6.92251	-5.62492	4686,9688,10189,10482,23279,23511,23636,129401,348995	NCBP1,NUP93,ALYREF,NXF1,NUP160,NUP188,NUP62,NUP35,NUP43	9/36
11_Member	Reactome Gene Sets	R-HSA-2995410	Nuclear Envelope (NE) Reassembly	-6.68026	-5.41416	4001,8815,9688,10383,23279,23511,23636,27243,128866,129401,348995	LMNB1,BANF1,NUP93,TUBB4B,NUP160,NUP188,NUP62,CHMP2A,CHMP4B,NUP35,NUP43	11/62
11_Member	Reactome Gene Sets	R-HSA-71387	Metabolism of carbohydrates	-6.64995	-5.38688	669,2582,2584,2799,2992,3098,5528,5836,6448,7311,9061,9688,10007,23279,23511,23636,25796,51181,55276,129401,283871,347734,348995	BPGM,GALE,GALK1,GNS,GYG1,HK1,PPP2R5D,PYGL,SGSH,UBA52,PAPSS1,NUP93,GNPDA1,NUP160,NUP188,NUP62,PGLS,DCXR,PGM2,NUP35,PGP,SLC35B2,NUP43	23/276
11_Member	Reactome Gene Sets	R-HSA-4615885	SUMOylation of DNA replication proteins	-6.59773	-5.34948	5111,7150,9688,23279,23511,23636,51588,129401,348995	PCNA,TOP1,NUP93,NUP160,NUP188,NUP62,PIAS4,NUP35,NUP43	9/39
11_Member	Reactome Gene Sets	R-HSA-176033	Interactions of Vpr with host cellular proteins	-6.57628	-5.33382	3836,8815,9688,23279,23511,23636,129401,348995	KPNA1,BANF1,NUP93,NUP160,NUP188,NUP62,NUP35,NUP43	8/29
11_Member	Reactome Gene Sets	R-HSA-180910	Vpr-mediated nuclear import of PICs	-6.57628	-5.33382	3836,8815,9688,23279,23511,23636,129401,348995	KPNA1,BANF1,NUP93,NUP160,NUP188,NUP62,NUP35,NUP43	8/29
11_Member	Reactome Gene Sets	R-HSA-70171	Glycolysis	-6.46249	-5.22857	669,3098,5528,9688,10007,23279,23511,23636,129401,283871,348995	BPGM,HK1,PPP2R5D,NUP93,GNPDA1,NUP160,NUP188,NUP62,NUP35,PGP,NUP43	11/65
11_Member	Reactome Gene Sets	R-HSA-2980766	Nuclear Envelope Breakdown	-5.86302	-4.7064	4001,8815,9688,23279,23511,23636,91754,129401,348995	LMNB1,BANF1,NUP93,NUP160,NUP188,NUP62,NEK9,NUP35,NUP43	9/47
11_Member	Reactome Gene Sets	R-HSA-168276	NS1 Mediated Effects on Host Pathways	-5.79174	-4.64446	3836,5610,9688,23279,23511,23636,129401,348995	KPNA1,EIF2AK2,NUP93,NUP160,NUP188,NUP62,NUP35,NUP43	8/36
11_Member	Reactome Gene Sets	R-HSA-70326	Glucose metabolism	-5.75895	-4.61626	669,3098,5528,9688,10007,23279,23511,23636,129401,283871,348995	BPGM,HK1,PPP2R5D,NUP93,GNPDA1,NUP160,NUP188,NUP62,NUP35,PGP,NUP43	11/76
11_Member	Reactome Gene Sets	R-HSA-168271	Transport of Ribonucleoproteins into the Host Nucleus	-5.61943	-4.50334	3836,9688,23279,23511,23636,129401,348995	KPNA1,NUP93,NUP160,NUP188,NUP62,NUP35,NUP43	7/27
11_Member	Reactome Gene Sets	R-HSA-72306	tRNA processing	-5.3927	-4.31761	9688,10556,11260,23279,23511,23636,51504,55644,79691,80324,129401,348995	NUP93,RPP30,XPOT,NUP160,NUP188,NUP62,TRMT112,OSGEP,QTRT2,PUS1,NUP35,NUP43	12/99
11_Member	Reactome Gene Sets	R-HSA-3301854	Nuclear Pore Complex (NPC) Disassembly	-5.18379	-4.13157	9688,23279,23511,23636,91754,129401,348995	NUP93,NUP160,NUP188,NUP62,NEK9,NUP35,NUP43	7/31
11_Member	Reactome Gene Sets	R-HSA-4085377	SUMOylation of SUMOylation proteins	-5.18379	-4.13157	9688,23279,23511,23636,51588,129401,348995	NUP93,NUP160,NUP188,NUP62,PIAS4,NUP35,NUP43	7/31
11_Member	Reactome Gene Sets	R-HSA-9705671	SARS-CoV-2 activates/modulates innate and adaptive immune responses	-5.0391	-4.00327	3326,6773,7311,7706,8517,9688,23118,23279,23511,23636,129401,348995	HSP90AB1,STAT2,UBA52,TRIM25,IKBKG,NUP93,TAB2,NUP160,NUP188,NUP62,NUP35,NUP43	12/107
11_Member	Reactome Gene Sets	R-HSA-9615933	Postmitotic nuclear pore complex (NPC) reformation	-5.02765	-3.9936	9688,23279,23511,23636,129401,348995	NUP93,NUP160,NUP188,NUP62,NUP35,NUP43	6/22
11_Member	Reactome Gene Sets	R-HSA-3232142	SUMOylation of ubiquitinylation proteins	-4.99093	-3.96043	9688,23279,23511,23636,51588,129401,348995	NUP93,NUP160,NUP188,NUP62,PIAS4,NUP35,NUP43	7/33
11_Member	Reactome Gene Sets	R-HSA-3108214	SUMOylation of DNA damage response and repair proteins	-4.71321	-3.72313	5885,6117,9688,23279,23511,23636,51588,129401,348995	RAD21,RPA1,NUP93,NUP160,NUP188,NUP62,PIAS4,NUP35,NUP43	9/64
11_Member	Reactome Gene Sets	R-HSA-6784531	tRNA processing in the nucleus	-4.60463	-3.6241	9688,10556,11260,23279,23511,23636,129401,348995	NUP93,RPP30,XPOT,NUP160,NUP188,NUP62,NUP35,NUP43	8/51
11_Member	Reactome Gene Sets	R-HSA-168333	NEP/NS2 Interacts with the Cellular Export Machinery	-4.37707	-3.41803	9688,23279,23511,23636,129401,348995	NUP93,NUP160,NUP188,NUP62,NUP35,NUP43	6/28
11_Member	Reactome Gene Sets	R-HSA-170822	Regulation of Glucokinase by Glucokinase Regulatory Protein	-4.37707	-3.41803	9688,23279,23511,23636,129401,348995	NUP93,NUP160,NUP188,NUP62,NUP35,NUP43	6/28
11_Member	Reactome Gene Sets	R-HSA-180746	Nuclear import of Rev protein	-4.37707	-3.41803	9688,23279,23511,23636,129401,348995	NUP93,NUP160,NUP188,NUP62,NUP35,NUP43	6/28
11_Member	Reactome Gene Sets	R-HSA-5619107	Defective TPR may confer susceptibility towards thyroid papillary carcinoma (TPC)	-4.37707	-3.41803	9688,23279,23511,23636,129401,348995	NUP93,NUP160,NUP188,NUP62,NUP35,NUP43	6/28
11_Member	Reactome Gene Sets	R-HSA-168274	Export of Viral Ribonucleoproteins from Nucleus	-4.19701	-3.25414	9688,23279,23511,23636,129401,348995	NUP93,NUP160,NUP188,NUP62,NUP35,NUP43	6/30
11_Member	Reactome Gene Sets	R-HSA-165054	Rev-mediated nuclear export of HIV RNA	-4.11234	-3.17945	9688,23279,23511,23636,129401,348995	NUP93,NUP160,NUP188,NUP62,NUP35,NUP43	6/31
11_Member	Reactome Gene Sets	R-HSA-177243	Interactions of Rev with host cellular proteins	-4.11234	-3.17945	9688,23279,23511,23636,129401,348995	NUP93,NUP160,NUP188,NUP62,NUP35,NUP43	6/31
11_Member	Reactome Gene Sets	R-HSA-4551638	SUMOylation of chromatin organization proteins	-3.92896	-3.01538	3065,9688,23279,23468,23511,23636,129401,348995	HDAC1,NUP93,NUP160,CBX5,NUP188,NUP62,NUP35,NUP43	8/63
11_Member	Reactome Gene Sets	R-HSA-9609646	HCMV Infection	-3.87829	-2.96873	1778,8841,9688,10383,10951,23279,23511,23636,27243,128866,129401,348995	DYNC1H1,HDAC3,NUP93,TUBB4B,CBX1,NUP160,NUP188,NUP62,CHMP2A,CHMP4B,NUP35,NUP43	12/140
11_Member	Reactome Gene Sets	R-HSA-4570464	SUMOylation of RNA binding proteins	-3.5357	-2.64701	9688,23279,23511,23636,129401,348995	NUP93,NUP160,NUP188,NUP62,NUP35,NUP43	6/39
11_Member	Reactome Gene Sets	R-HSA-9609690	HCMV Early Events	-3.17334	-2.30578	1778,8841,9688,10383,10951,23279,23511,23636,129401,348995	DYNC1H1,HDAC3,NUP93,TUBB4B,CBX1,NUP160,NUP188,NUP62,NUP35,NUP43	10/122
11_Member	Reactome Gene Sets	R-HSA-5578749	Transcriptional regulation by small RNAs	-3.13915	-2.27347	3014,5438,5441,9688,23279,23511,23636,129401,348995	H2AX,POLR2I,POLR2L,NUP93,NUP160,NUP188,NUP62,NUP35,NUP43	9/102
11_Member	Reactome Gene Sets	R-HSA-68875	Mitotic Prophase	-2.88483	-2.04318	3014,4001,8815,9688,23279,23511,23636,91754,129401,348995	H2AX,LMNB1,BANF1,NUP93,NUP160,NUP188,NUP62,NEK9,NUP35,NUP43	10/133
11_Member	Reactome Gene Sets	R-HSA-9610379	HCMV Late Events	-2.42263	-1.63264	9688,23279,23511,23636,27243,128866,129401,348995	NUP93,NUP160,NUP188,NUP62,CHMP2A,CHMP4B,NUP35,NUP43	8/106
11_Member	Reactome Gene Sets	R-HSA-211000	Gene Silencing by RNA	-2.40889	-1.62193	3014,5438,5441,9688,23279,23511,23636,129401,348995	H2AX,POLR2I,POLR2L,NUP93,NUP160,NUP188,NUP62,NUP35,NUP43	9/130
11_Member	Reactome Gene Sets	R-HSA-5619102	SLC transporter disorders	-2.25251	-1.49194	3098,9688,23279,23511,23636,129401,348995	HK1,NUP93,NUP160,NUP188,NUP62,NUP35,NUP43	7/90
12_Summary	Reactome Gene Sets	R-HSA-9837999	Mitochondrial protein degradation	-11.2849	-9.64883	36,50,1431,1629,2271,3313,3419,4722,4723,6182,6472,7019,7385,8192,10845,26519,26520,27089,8802,23530	ACADSB,ACO2,CS,DBT,FH,HSPA9,IDH3A,NDUFS3,NDUFV1,MRPL12,SHMT2,TFAM,UQCRC2,CLPP,CLPX,TIMM10,TIMM9,UQCRQ,SUCLG1,NNT	20/-
12_Member	Reactome Gene Sets	R-HSA-9837999	Mitochondrial protein degradation	-11.2849	-9.64883	36,50,1431,1629,2271,3313,3419,4722,4723,6182,6472,7019,7385,8192,10845,26519,26520,27089	ACADSB,ACO2,CS,DBT,FH,HSPA9,IDH3A,NDUFS3,NDUFV1,MRPL12,SHMT2,TFAM,UQCRC2,CLPP,CLPX,TIMM10,TIMM9,UQCRQ	18/92
12_Member	Reactome Gene Sets	R-HSA-71403	Citric acid cycle (TCA cycle)	-3.95251	-3.0335	50,1431,2271,3419,8802,23530	ACO2,CS,FH,IDH3A,SUCLG1,NNT	6/33
13_Summary	Reactome Gene Sets	R-HSA-5389840	Mitochondrial translation elongation	-10.7693	-9.15408	3396,6182,10102,10884,11222,26589,28957,29074,51069,54460,55037,57129,64949,64969,64975,79590,90480	MRPL58,MRPL12,TSFM,MRPS30,MRPL3,MRPL46,MRPS28,MRPL18,MRPL2,MRPS21,PTCD3,MRPL47,MRPS26,MRPS5,MRPL41,MRPL24,GADD45GIP1	17/-
13_Member	Reactome Gene Sets	R-HSA-5389840	Mitochondrial translation elongation	-10.7693	-9.15408	3396,6182,10102,10884,11222,26589,28957,29074,51069,54460,55037,57129,64949,64969,64975,79590,90480	MRPL58,MRPL12,TSFM,MRPS30,MRPL3,MRPL46,MRPS28,MRPL18,MRPL2,MRPS21,PTCD3,MRPL47,MRPS26,MRPS5,MRPL41,MRPL24,GADD45GIP1	17/86
13_Member	Reactome Gene Sets	R-HSA-5368287	Mitochondrial translation	-10.2776	-8.69504	3396,6182,10102,10884,11222,26589,28957,29074,51069,54460,55037,57129,64949,64969,64975,79590,90480	MRPL58,MRPL12,TSFM,MRPS30,MRPL3,MRPL46,MRPS28,MRPL18,MRPL2,MRPS21,PTCD3,MRPL47,MRPS26,MRPS5,MRPL41,MRPL24,GADD45GIP1	17/92
13_Member	Reactome Gene Sets	R-HSA-5368286	Mitochondrial translation initiation	-9.7573	-8.22235	3396,6182,10884,11222,26589,28957,29074,51069,54460,55037,57129,64949,64969,64975,79590,90480	MRPL58,MRPL12,MRPS30,MRPL3,MRPL46,MRPS28,MRPL18,MRPL2,MRPS21,PTCD3,MRPL47,MRPS26,MRPS5,MRPL41,MRPL24,GADD45GIP1	16/86
13_Member	Reactome Gene Sets	R-HSA-5419276	Mitochondrial translation termination	-9.7573	-8.22235	3396,6182,10884,11222,26589,28957,29074,51069,54460,55037,57129,64949,64969,64975,79590,90480	MRPL58,MRPL12,MRPS30,MRPL3,MRPL46,MRPS28,MRPL18,MRPL2,MRPS21,PTCD3,MRPL47,MRPS26,MRPS5,MRPL41,MRPL24,GADD45GIP1	16/86
14_Summary	Reactome Gene Sets	R-HSA-5663202	Diseases of signal transduction by growth factor receptors and second messengers	-10.5376	-8.92908	391,572,1445,2931,2962,2963,3065,3726,4686,5438,5441,5528,5529,5604,5683,5686,5690,5692,5694,5709,7311,7415,8036,8315,8323,8841,9061,9978,10213,10956,11140,23385,27248,382,857,1845,2185,3185,3912,3915,4670,5899,23118,63916,84951,222584	RHOG,BAD,CSK,GSK3A,GTF2F1,GTF2F2,HDAC1,JUNB,NCBP1,POLR2I,POLR2L,PPP2R5D,PPP2R5E,MAP2K1,PSMA2,PSMA5,PSMB2,PSMB4,PSMB6,PSMD3,UBA52,VCP,SHOC2,BRAP,FZD6,HDAC3,PAPSS1,RBX1,PSMD14,OS9,CDC37,NCSTN,ERLEC1,ARF6,CAV1,DUSP3,PTK2B,HNRNPF,LAMB1,LAMC1,HNRNPM,RALB,TAB2,ELMO2,TNS4,FAM83B	46/-
14_Member	Reactome Gene Sets	R-HSA-5663202	Diseases of signal transduction by growth factor receptors and second messengers	-10.5376	-8.92908	391,572,1445,2931,2962,2963,3065,3726,4686,5438,5441,5528,5529,5604,5683,5686,5690,5692,5694,5709,7311,7415,8036,8315,8323,8841,9061,9978,10213,10956,11140,23385,27248	RHOG,BAD,CSK,GSK3A,GTF2F1,GTF2F2,HDAC1,JUNB,NCBP1,POLR2I,POLR2L,PPP2R5D,PPP2R5E,MAP2K1,PSMA2,PSMA5,PSMB2,PSMB4,PSMB6,PSMD3,UBA52,VCP,SHOC2,BRAP,FZD6,HDAC3,PAPSS1,RBX1,PSMD14,OS9,CDC37,NCSTN,ERLEC1	33/354
14_Member	Reactome Gene Sets	R-HSA-9006934	Signaling by Receptor Tyrosine Kinases	-5.22129	-4.16346	382,857,1445,1845,2185,2962,2963,3065,3185,3726,3912,3915,4670,4686,5438,5441,5528,5604,5899,7311,8841,11140,23118,23385,63916,84951,222584	ARF6,CAV1,CSK,DUSP3,PTK2B,GTF2F1,GTF2F2,HDAC1,HNRNPF,JUNB,LAMB1,LAMC1,HNRNPM,NCBP1,POLR2I,POLR2L,PPP2R5D,MAP2K1,RALB,UBA52,HDAC3,CDC37,TAB2,NCSTN,ELMO2,TNS4,FAM83B	27/433
15_Summary	Reactome Gene Sets	R-HSA-1428517	Aerobic respiration and respiratory electron transport	-7.43195	-6.06742	50,513,1431,2271,2739,3052,3313,3419,4701,4702,4704,4713,4720,4722,4723,4729,7311,7385,8802,23530,27089,51204,54994	ACO2,ATP5F1D,CS,FH,GLO1,HCCS,HSPA9,IDH3A,NDUFA7,NDUFA8,NDUFA9,NDUFB7,NDUFS2,NDUFS3,NDUFV1,NDUFV2,UBA52,UQCRC2,SUCLG1,NNT,UQCRQ,TACO1,GID8	23/-
15_Member	Reactome Gene Sets	R-HSA-1428517	Aerobic respiration and respiratory electron transport	-7.43195	-6.06742	50,513,1431,2271,2739,3052,3313,3419,4701,4702,4704,4713,4720,4722,4723,4729,7311,7385,8802,23530,27089,51204,54994	ACO2,ATP5F1D,CS,FH,GLO1,HCCS,HSPA9,IDH3A,NDUFA7,NDUFA8,NDUFA9,NDUFB7,NDUFS2,NDUFS3,NDUFV1,NDUFV2,UBA52,UQCRC2,SUCLG1,NNT,UQCRQ,TACO1,GID8	23/250
15_Member	Reactome Gene Sets	R-HSA-6799198	Complex I biogenesis	-4.65762	-3.67394	3313,4701,4702,4704,4713,4720,4722,4723,4729	HSPA9,NDUFA7,NDUFA8,NDUFA9,NDUFB7,NDUFS2,NDUFS3,NDUFV1,NDUFV2	9/65
15_Member	Reactome Gene Sets	R-HSA-611105	Respiratory electron transport	-4.14281	-3.20424	3052,3313,4701,4702,4704,4713,4720,4722,4723,4729,7385,27089,51204	HCCS,HSPA9,NDUFA7,NDUFA8,NDUFA9,NDUFB7,NDUFS2,NDUFS3,NDUFV1,NDUFV2,UQCRC2,UQCRQ,TACO1	13/152
16_Summary	Reactome Gene Sets	R-HSA-15869	Metabolism of nucleotides	-7.38485	-6.0241	158,203,353,1503,2745,3615,4860,5471,6240,7083,7371,11164,22978,53343	ADSL,AK1,APRT,CTPS1,GLRX,IMPDH2,PNP,PPAT,RRM1,TK1,UCK2,NUDT5,NT5C2,NUDT9	14/-
16_Member	Reactome Gene Sets	R-HSA-15869	Metabolism of nucleotides	-7.38485	-6.0241	158,203,353,1503,2745,3615,4860,5471,6240,7083,7371,11164,22978,53343	ADSL,AK1,APRT,CTPS1,GLRX,IMPDH2,PNP,PPAT,RRM1,TK1,UCK2,NUDT5,NT5C2,NUDT9	14/93
16_Member	Reactome Gene Sets	R-HSA-74259	Purine catabolism	-3.13338	-2.27184	4860,11164,22978,53343	PNP,NUDT5,NT5C2,NUDT9	4/18
16_Member	Reactome Gene Sets	R-HSA-8956321	Nucleotide salvage	-2.86655	-2.02717	353,4860,7083,7371	APRT,PNP,TK1,UCK2	4/21
16_Member	Reactome Gene Sets	R-HSA-8956319	Nucleotide catabolism	-2.03817	-1.30247	4860,11164,22978,53343	PNP,NUDT5,NT5C2,NUDT9	4/35
17_Summary	Reactome Gene Sets	R-HSA-381119	Unfolded Protein Response (UPR)	-7.24172	-5.89947	37,811,1965,2931,3309,5393,7184,8570,10113,10954,11340,51010,54512	ACADVL,CALR,EIF2S1,GSK3A,HSPA5,EXOSC9,HSP90B1,KHSRP,PREB,PDIA5,EXOSC8,EXOSC3,EXOSC4	13/-
17_Member	Reactome Gene Sets	R-HSA-381119	Unfolded Protein Response (UPR)	-7.24172	-5.89947	37,811,1965,2931,3309,5393,7184,8570,10113,10954,11340,51010,54512	ACADVL,CALR,EIF2S1,GSK3A,HSPA5,EXOSC9,HSP90B1,KHSRP,PREB,PDIA5,EXOSC8,EXOSC3,EXOSC4	13/81
17_Member	Reactome Gene Sets	R-HSA-381070	IRE1alpha activates chaperones	-2.4275	-1.63547	37,2931,3309,10113,10954	ACADVL,GSK3A,HSPA5,PREB,PDIA5	5/44
18_Summary	Reactome Gene Sets	R-HSA-532668	N-glycan trimming in the ER and Calnexin/Calreticulin cycle	-6.10283	-4.90149	811,2923,5589,5887,7311,7415,9761,10956,2589,2931,25921,3836	CALR,PDIA3,PRKCSH,RAD23B,UBA52,VCP,MLEC,OS9,GALNT1,GSK3A,ZDHHC5,KPNA1	12/-
18_Member	Reactome Gene Sets	R-HSA-532668	N-glycan trimming in the ER and Calnexin/Calreticulin cycle	-6.10283	-4.90149	811,2923,5589,5887,7311,7415,9761,10956	CALR,PDIA3,PRKCSH,RAD23B,UBA52,VCP,MLEC,OS9	8/33
18_Member	Reactome Gene Sets	R-HSA-901042	Calnexin/calreticulin cycle	-3.57724	-2.68472	811,2923,5589,7311,10956	CALR,PDIA3,PRKCSH,UBA52,OS9	5/25
18_Member	Reactome Gene Sets	R-HSA-9683701	Translation of Structural Proteins	-2.44817	-1.65477	2589,2931,5589,7311	GALNT1,GSK3A,PRKCSH,UBA52	4/27
18_Member	Reactome Gene Sets	R-HSA-9694635	Translation of Structural Proteins	-2.15117	-1.40367	2589,2931,5589,7311,25921	GALNT1,GSK3A,PRKCSH,UBA52,ZDHHC5	5/51
18_Member	Reactome Gene Sets	R-HSA-9637690	Response of Mtb to phagocytosis	-2.01375	-1.28162	2931,3836,7311	GSK3A,KPNA1,UBA52	3/19
19_Summary	Reactome Gene Sets	R-HSA-6790901	rRNA modification in the nucleus and cytosol	-5.93496	-4.76394	6208,9136,10436,25879,51504,55127,55623,57050,79050,84135	RPS14,RRP9,EMG1,DCAF13,TRMT112,HEATR1,THUMPD1,UTP3,NOC4L,UTP15	10/-
19_Member	Reactome Gene Sets	R-HSA-6790901	rRNA modification in the nucleus and cytosol	-5.93496	-4.76394	6208,9136,10436,25879,51504,55127,55623,57050,79050,84135	RPS14,RRP9,EMG1,DCAF13,TRMT112,HEATR1,THUMPD1,UTP3,NOC4L,UTP15	10/59
20_Summary	Reactome Gene Sets	R-HSA-8950505	Gene and protein expression by JAK-STAT signaling after Interleukin-12 stimulation	-5.79174	-4.64446	3185,3313,4001,4282,5055,5306,5721,9049	HNRNPF,HSPA9,LMNB1,MIF,SERPINB2,PITPNA,PSME2,AIP	8/-
20_Member	Reactome Gene Sets	R-HSA-8950505	Gene and protein expression by JAK-STAT signaling after Interleukin-12 stimulation	-5.79174	-4.64446	3185,3313,4001,4282,5055,5306,5721,9049	HNRNPF,HSPA9,LMNB1,MIF,SERPINB2,PITPNA,PSME2,AIP	8/36
20_Member	Reactome Gene Sets	R-HSA-9020591	Interleukin-12 signaling	-5.02072	-3.98845	3185,3313,4001,4282,5055,5306,5721,9049	HNRNPF,HSPA9,LMNB1,MIF,SERPINB2,PITPNA,PSME2,AIP	8/45
20_Member	Reactome Gene Sets	R-HSA-447115	Interleukin-12 family signaling	-4.66969	-3.68441	3185,3313,4001,4282,5055,5306,5721,9049	HNRNPF,HSPA9,LMNB1,MIF,SERPINB2,PITPNA,PSME2,AIP	8/50

## Sheet: Supplementary Table 1D
Supplementary Table 1B. Orthologous proteins overrepresented by at least 30% (Log₂FC ≥ 0.378) in all four tumor cell lines compared to the 184B5 control line. CLF: Canis lupus familiaris. HSA: Homo sapiens.
UniProt CLF	UniProt HSA	Gene	Protein Name (CLF)	Protein Name (HSA)	MCF-7 Log2FC	MDA-MB-231 Log2FC	CMT-U27 Log2FC	IPC-366 Log2FC
A0A8C0LQW9	P62330	ARF6	ADP ribosylation factor 6	ADP-ribosylation factor 6	2.67929	2.54665	9.00673	8.00981
A0A8C0LUT7	Q9GZP4	PITHD1	PITH domain-containing protein	PITH domain-containing protein 1	2.73988	1.64344	8.12308	8.57898
A0A8C0LVF0	Q96I25	RBM17	Splicing factor 45		0.892069	1.42146	1.0291	1.21493
A0A8C0LW98	A6NDG6	PGP	Glycerol-3-phosphate phosphatase		2.56707	2.58536	7.90717	5.24006
A0A8C0LYL3	Q6P4I2	WDR73	WD repeat domain 73	WD repeat-containing protein 73	2.7484	1.82918	7.40273	8.06467
A0A8C0M0J2	Q8TED0	UTP15	U3 small nucleolar RNA-associated protein 15 homolog		2.47615	2.06667	7.37934	4.16021
A0A8C0M330	Q9NVE7	PANK4	4'-phosphopantetheine phosphatase		0.76488	1.83395	2.14773	3.57438
A0A8C0M4B9	Q13131	PRKAA1	Acetyl-CoA carboxylase kinase	5'-AMP-activated protein kinase catalytic subunit alpha-1	1.01117	1.5228	3.06962	0.745287
A0A8C0M5X6	Q6PD62	CTR9	CTR9 homolog, Paf1/RNA polymerase II complex component	RNA polymerase-associated protein CTR9 homolog	1.65555	1.85313	6.73233	7.29057
A0A8C0M9X8	Q01664	TFAP4	Transcription factor AP-4		0.582667	1.46618	5.21018	5.94299
A0A8C0MAM8	Q9HC36	MRM3	Mitochondrial rRNA methyltransferase 3	rRNA methyltransferase 3, mitochondrial	0.589172	1.5825	1.46239	2.10703
A0A8C0MCE1	O15400	STX7	Syntaxin-7		1.77152	1.59642	6.42058	5.75727
A0A8C0MCU4	O60216	RAD21	RAD21 cohesin complex component	Double-strand-break repair protein rad21 homolog	1.65711	1.67414	6.36323	7.62531
A0A8C0MD95	Q2TAA2	IAH1	Isoamyl acetate-hydrolyzing esterase 1 homolog		3.25077	1.77223	6.32955	5.49444
A0A8C0MDB0	Q99747	NAPG	Gamma-soluble NSF attachment protein		1.55374	1.31175	6.15524	6.18848
A0A8C0MDE6	Q9NQT5	EXOSC3	Ribosomal RNA-processing protein 40	Exosome complex component RRP40	1.25141	1.76057	2.28989	2.23823
A0A8C0MDY8	O95433	AHSA1	Activator of HSP90 ATPase activity 1	Activator of 90 kDa heat shock protein ATPase homolog 1	1.68873	1.84879	0.441824	1.41176
A0A8C0MHI6	O75312	ZPR1	Zinc finger ZPR1-type domain-containing protein	Zinc finger protein ZPR1	2.27608	3.26197	5.87627	5.41826
A0A8C0MIF6	P11387	TOP1	DNA topoisomerase I	DNA topoisomerase 1	0.782079	1.41582	5.55691	5.67987
A0A8C0MKQ1	Q12769	NUP160	Nucleoporin 160	Nuclear pore complex protein Nup160	2.35433	1.48738	5.56169	5.2355
A0A8C0MLT7	P00491	PNP	Purine nucleoside phosphorylase		2.03094	1.54126	5.34514	7.03362
A0A8C0MMS2	Q9NRL2	BAZ1A	Bromodomain adjacent to zinc finger domain 1A	Bromodomain adjacent to zinc finger domain protein 1A	2.60284	1.71566	5.26572	4.23123
A0A8C0MN88	O43660	PLRG1	Pleiotropic regulator 1		0.980181	1.70063	4.47993	4.14496
A0A8C0MN98	O00148	DDX39A	RNA helicase	ATP-dependent RNA helicase DDX39A	0.806777	1.30632	2.95931	2.44069
A0A8C0MSY3	O95159	ZFPL1	Zinc finger protein-like 1		2.18794	1.58007	5.05366	6.08554
A0A8C0MYP5	P28072	PSMB6	Proteasome subunit beta	Proteasome subunit beta type-6	0.746653	1.45715	4.96609	5.87244
A0A8C0MZS3	Q15397	PUM3	Pumilio RNA binding family member 3	Pumilio homolog 3	1.46852	1.30841	4.83523	4.87854
A0A8C0N2D6	Q13144	EIF2B5	Translation initiation factor eIF2B subunit epsilon		0.955569	1.48785	4.06383	4.75879
A0A8C0N2S9	Q9GZM5	YIPF3	Protein YIPF3		2.23608	1.57923	4.59965	3.94631
A0A8C0N3K7	Q96CW1	AP2M1	AP-2 complex subunit mu		4.09737	1.91201	4.56807	4.94276
A0A8C0N7E3	O76071	CIAO1	Probable cytosolic iron-sulfur protein assembly protein CIAO1		1.58343	2.12594	4.5535	4.70819
A0A8C0NA32	Q9Y3S2	ZNF330	Zinc finger protein 330		1.47379	1.30683	4.16921	4.69041
A0A8C0NCE2	Q13541	EIF4EBP1	Eukaryotic translation initiation factor 4E binding protein 1	Eukaryotic translation initiation factor 4E-binding protein 1	2.00859	1.7271	4.12297	3.4473
A0A8C0ND40	Q2NKX8	ERCC6L	ERCC excision repair 6 like, spindle assembly checkpoint helicase	DNA excision repair protein ERCC-6-like	0.838429	1.60556	4.30327	3.88687
A0A8C0NFL6	P04183	TK1	Thymidine kinase	Thymidine kinase, cytosolic	1.97468	1.67082	3.89795	3.59126
A0A8C0NFX7	Q9BWD1	ACAT2	acetyl-CoA C-acetyltransferase	Acetyl-CoA acetyltransferase, cytosolic	1.12294	1.35662	7.4955	7.24417
A0A8C0NHA5	Q9UBL3	ASH2L	ASH2 like, histone lysine methyltransferase complex subunit	Set1/Ash2 histone methyltransferase complex subunit ASH2	0.854019	1.63013	2.83059	2.75897
A0A8C0NI19	P78346	RPP30	Ribonuclease P/MRP subunit p30	Ribonuclease P protein subunit p30	0.67673	1.61602	0.583605	1.64364
A0A8C0NI34	Q99661	KIF2C	Kinesin-like protein	Kinesin-like protein KIF2C	1.7017	1.37496	3.33054	3.8337
A0A8C0NKF1	Q96B26	EXOSC8	Ribosomal RNA-processing protein 43	Exosome complex component RRP43	2.23192	1.89779	2.05367	1.94932
A0A8C0NM54	Q9UKK9	NUDT5	Nudix hydrolase 5	ADP-sugar pyrophosphatase	0.614681	1.31087	3.9669	3.2143
A0A8C0NNG9	Q9BXB5	OSBPL10	Oxysterol-binding protein	Oxysterol-binding protein-related protein 10	1.19185	1.76077	2.3522	2.74933
A0A8C0NUW8	P31942	HNRNPH3	Heterogeneous nuclear ribonucleoprotein H3		1.09791	1.42461	4.73316	5.76028
A0A8C0NVT2	P35249	RFC4	AAA+ ATPase domain-containing protein	Replication factor C subunit 4	1.0817	2.52271	7.2542	8.18418
A0A8C0NZT7	Q9NV06	DCAF13	DDB1- and CUL4-associated factor 13		1.78509	2.03705	2.01508	2.9041
A0A8C0P0X4	Q9NQ55	PPAN	Peter pan homolog	Suppressor of SWI4 1 homolog	0.520356	1.56581	1.3097	1.9873
A0A8C0P5A7	Q8TAE8	GADD45GIP1	Large ribosomal subunit protein mL64		0.590145	1.55103	2.04794	2.60205
A0A8C0P6T9	Q9NWU2	GID8	GID complex subunit 8 homolog	Glucose-induced degradation protein 8 homolog	1.10885	1.41001	3.03924	3.50006
A0A8C0P827	P49756	RBM25	RNA binding motif protein 25	RNA-binding protein 25	1.59565	1.61385	1.8062	1.99833
A0A8C0P851	Q96CN7	ISOC1	Isochorismatase domain-containing protein 1		1.11357	1.74934	2.68768	3.094
A0A8C0PHY2	O14908	GIPC1	GIPC PDZ domain containing family member 1	PDZ domain-containing protein GIPC1	1.79069	2.28589	1.63238	4.07231
A0A8C0PJK5	Q05048	CSTF1	Cleavage stimulation factor 50 kDa subunit	Cleavage stimulation factor subunit 1	1.19059	0.878738	2.43871	3.58296
A0A8C0PMC8	Q9NPD3	EXOSC4	Exosome component 4	Exosome complex component RRP41	2.22841	0.422443	3.89119	3.08414
A0A8C0PND9	Q86SX6	GLRX5	Glutaredoxin domain-containing protein	Glutaredoxin-related protein 5, mitochondrial	3.33903	1.02581	1.59511	2.74493
A0A8C0PP51	P04080	CSTB	Cystatin domain-containing protein	Cystatin-B	1.00472	0.693114	3.72431	4.18586
A0A8C0PPZ1	Q9UBX3	SLC25A10	Solute carrier family 25 member 10	Mitochondrial dicarboxylate carrier	0.781362	0.823913	3.2954	3.42298
A0A8C0PS52	Q96SZ5	ADO	2-aminoethanethiol dioxygenase		1.46532	1.18528	5.32263	3.47973
A0A8C0PT23	P62314	SNRPD1	Small nuclear ribonucleoprotein Sm D1		0.625933	0.624904	3.62849	3.39589
A0A8C0PW06	Q9H974	QTRT2	Queuine tRNA-ribosyltransferase accessory subunit 2		0.407604	0.629028	1.83677	1.47649
A0A8C0PXP5	Q9H583	HEATR1	HEAT repeat-containing protein 1		1.05143	0.482875	1.63644	1.3895
A0A8C0Q002	O43264	ZW10	Zw10 kinetochore protein	Centromere/kinetochore protein zw10 homolog	0.649985	1.17169	0.399309	0.512634
A0A8C0Q308	Q9BUE0	MED18	Mediator of RNA polymerase II transcription subunit 18		1.2126	0.601981	2.27784	2.63158
A0A8C0Q3H0	Q12962	TAF10	Transcription initiation factor TFIID subunit 10		0.614877	0.657867	1.82125	3.02705
A0A8C0Q503	Q8WXX5	DNAJC9	J domain-containing protein	DnaJ homolog subfamily C member 9	0.795811	0.473713	3.98065	3.49656
A0A8C0Q5G0	Q9H832	UBE2Z	Ubiquitin-conjugating enzyme E2 Z		1.32813	1.00155	5.9509	5.40235
A0A8C0Q875	P27694	RPA1	Replication protein A subunit	Replication protein A 70 kDa DNA-binding subunit	1.99456	0.64533	2.29031	1.3988
A0A8C0QDA8	P50416	CPT1A	Carnitine palmitoyltransferase 1A	Carnitine O-palmitoyltransferase 1, liver isoform	0.891078	0.464663	2.59113	3.14856
A0A8C0QFE7	Q13610	PWP1	PWP1 homolog, endonuclein	Periodic tryptophan protein 1 homolog	0.846824	1.26241	1.53928	1.00775
A0A8C0QGX1	Q9Y3B4	SF3B6	Splicing factor 3b subunit 6		2.27182	0.634697	2.6944	2.01888
A0A8C0R9T3	O43633	CHMP2A	Charged multivesicular body protein 2a		0.781969	0.727824	1.86188	2.06149
A0A8C0RAS4	O96008	TOMM40	Mitochondrial import receptor subunit TOM40 homolog		0.813943	1.06111	2.5279	2.80795
A0A8C0RC43	Q06265	EXOSC9	Exosome complex component RRP45		0.5137	0.731423	3.36662	2.68217
A0A8C0RD13	Q86U44	METTL3	mRNA m(6)A methyltransferase	N6-adenosine-methyltransferase catalytic subunit	0.583745	0.901997	4.10147	3.30003
A0A8C0RD96	Q9H4H8	FAM83D	Family with sequence similarity 83 member D	Protein FAM83D	0.778077	0.859912	1.93417	2.13413
A0A8C0REJ2	Q6PL18	ATAD2	ATPase family AAA domain containing 2	ATPase family AAA domain-containing protein 2	0.560923	0.755144	5.70721	5.54462
A0A8C0RIU2	Q8NFV4	ABHD11	sn-1-specific diacylglycerol lipase ABHD11		0.511929	1.18922	2.27464	1.6693
A0A8C0RJM3	Q15007	WTAP	Pre-mRNA-splicing regulator WTAP		1.17049	1.28884	3.83494	4.1688
A0A8C0RNZ0	P23921	RRM1	Ribonucleoside-diphosphate reductase	Ribonucleoside-diphosphate reductase large subunit	0.460854	0.60629	1.08659	1.20664
A0A8C0RW57	P61081	UBE2M	E2 NEDD8-conjugating enzyme	NEDD8-conjugating enzyme Ubc12	0.955184	1.07935	3.50072	4.19831
A0A8C0RW74	Q13907	IDI1	isopentenyl-diphosphate Delta-isomerase	Isopentenyl-diphosphate Delta-isomerase 1	3.99616	0.879925	4.50954	5.48448
A0A8C0S062	P19623	SRM	Spermidine synthase		0.660323	0.868978	5.38935	5.56751
A0A8C0S0Q8	P50583	NUDT2	Bis(5'-nucleosyl)-tetraphosphatase [asymmetrical]		0.386053	0.713492	2.08734	2.55406
A0A8C0S1X7	Q10472	GALNT1	Polypeptide N-acetylgalactosaminyltransferase	Polypeptide N-acetylgalactosaminyltransferase 1	0.381952	1.16959	0.544319	1.24575
A0A8C0S8A4	O00170	AIP	peptidylprolyl isomerase	AH receptor-interacting protein	1.65532	1.02434	3.77534	5.06221
A0A8C0S9W0	P29372	MPG	DNA-3-methyladenine glycosylase II	DNA-3-methyladenine glycosylase	2.86739	0.926477	4.28236	2.87292
A0A8C0SJF8	P49770	EIF2B2	Translation initiation factor eIF2B subunit beta		1.0033	1.24316	5.63085	7.09587
A0A8C0SLN6	O75531	BANF1	Barrier-to-autointegration factor		0.46365	0.601502	3.03871	3.51806
A0A8C0SNP1	Q9H7Z7	PTGES2	Prostaglandin E synthase 2		0.936254	0.713507	3.96437	3.52476
A0A8C0SP36	Q96BW1	UPRT	Uracil phosphoribosyltransferase homolog		0.800792	0.75091	0.696171	0.875692
A0A8C0SRC2	P40938	RFC3	Replication factor C subunit 3		1.147	1.10994	4.48168	3.98151
A0A8C0SZN9	Q3MHD2	LSM12	LSM12 homolog	Protein LSM12	1.65266	0.571571	2.34303	1.74335
A0A8C0T1B7	Q92688	ANP32B	Acidic leucine-rich nuclear phosphoprotein 32 family member	Acidic leucine-rich nuclear phosphoprotein 32 family member B	0.933137	0.992114	3.84602	3.1856
A0A8C0T1C8	Q9UBU9	NXF1	Nuclear RNA export factor 1		0.636661	0.38346	1.16137	1.13825
A0A8C0T3Z6	Q99426	TBCB	Tubulin-folding cofactor B		1.94047	0.883077	7.62633	5.73236
A0A8C0T5K5	Q8N8A6	DDX51	ATP-dependent RNA helicase	ATP-dependent RNA helicase DDX51	2.79279	0.736093	5.40978	3.49688
A0A8C0T6K5	Q9UJX3	ANAPC7	Anaphase-promoting complex subunit 7		0.736167	0.835708	2.95543	3.146
A0A8C0T8L9	P29083	GTF2E1	Ral transcription factor IIE subunit 1	General transcription factor IIE subunit 1	1.25352	1.01437	4.8622	5.0565
A0A8C0TAR3	P16104	H2AX	Histone H2A	Histone H2AX	0.70902	0.722481	2.70407	2.39058
A0A8C0TAV5	Q9UK41	VPS28	Vacuolar protein sorting-associated protein 28 homolog		0.478751	0.849666	1.39429	1.9605
A0A8C0TCH9	Q7Z569	BRAP	BRCA1-associated protein		1.08577	0.473474	0.59934	0.884533
A0A8C0TCX7	Q14320	FAM50A	FAM50A/XAP5 C-terminal domain-containing protein	Protein FAM50A	0.575227	0.69746	2.42522	2.70241
A0A8C0TCZ5	P26583	HMGB2	High mobility group protein B2		1.51243	0.545692	1.82937	1.16803
A0A8C0TFU2	Q6NXE6	ARMC6	Armadillo repeat-containing protein 6		0.620019	1.03229	6.90188	6.59291
A0A8C0TIP6	Q969Z0	TBRG4	FAST kinase domain-containing protein 4		1.09976	0.9541	3.49438	1.61669
A0A8C0TNH3	Q9Y295	DRG1	Developmentally-regulated GTP-binding protein 1		0.694561	0.801031	3.10227	2.2298
A0A8C0TSZ8	Q96AX1	VPS33A	Vacuolar protein sorting-associated protein 33A		0.791917	0.747501	2.30765	2.76219
A0A8C0TZW5	Q6AI12	ANKRD40	Ankyrin repeat domain 40	Ankyrin repeat domain-containing protein 40	0.851823	0.915967	1.58193	2.19449
A0A8C0Z0M5	Q9BSF4	TIMM29	Translocase of inner mitochondrial membrane 29	Mitochondrial import inner membrane translocase subunit Tim29	0.688962	0.896077	2.33917	2.54787
A0A8C0Z2G8	Q15021	NCAPD2	Condensin complex subunit 1		1.63962	0.978604	3.19551	4.03163
A0A8C0Z5H2	Q14232	EIF2B1	Translation initiation factor eIF2B subunit alpha		0.800813	0.697299	2.95644	2.71094
A0A8C0Z5Z6	Q9BQ61	TRIR	Telomerase RNA component interacting RNase		2.28974	1.06149	5.21214	6.41323
A0A8I3P0V5	Q9GZL7	WDR12	Ribosome biogenesis protein WDR12		0.732372	0.899236	1.85897	2.37805
A0A8C0NI41	Q8WTS6	SETD7	Histone-lysine N-methyltransferase SETD7		1.75629	0.983089	2.36148	1.26945
A0A8C0P4I5	Q06203	PPAT	Amidophosphoribosyltransferase		1.75067	0.536535	1.95712	1.19299
A0A8C0MM41	Q9NRN7	AASDHPPT	L-aminoadipate-semialdehyde dehydrogenase-phosphopantetheinyl transferase		1.19422	1.16798	4.31971	3.93552
A0A8C0N1A6	Q9BW19	KIFC1	Kinesin-like protein	Kinesin-like protein KIFC1	0.466963	0.598128	1.58602	1.68954
A0A8C0RW25	Q9HAV7	GRPEL1	GrpE protein homolog	GrpE protein homolog 1, mitochondrial	0.938629	0.556694	4.41999	3.3017
A0A8C0PGJ2	Q9H6W3	RIOX1	Bifunctional lysine-specific demethylase and histidyl-hydroxylase	Ribosomal oxygenase 1	1.36791	0.9847	2.73543	2.15445
A0A8C0LRW8	Q9Y314	NOSIP	Nitric oxide synthase-interacting protein		0.401614	0.436495	2.28315	2.32038
A0A8C0TFS1	Q04760	GLO1	Lactoylglutathione lyase		1.42253	1.19041	3.1512	3.37073
A0A8C0NK68	Q9Y230	RUVBL2	RuvB-like helicase	RuvB-like 2	1.46983	1.03998	2.90269	4.06764
A0A8C0NJP5	Q5T5P2	KIAA1217	Actin interacting protein 3-like C-terminal domain-containing protein	Sickle tail protein homolog	0.456088	0.599052	0.899512	1.73965
A0A8C0N2E1	Q9Y3C6	PPIL1	Peptidyl-prolyl cis-trans isomerase	Peptidyl-prolyl cis-trans isomerase-like 1	1.80301	1.12619	4.28388	5.07753
A0A8C0PXP8	Q7L4I2	RSRC2	Arginine/serine-rich coiled-coil protein 2		0.899564	0.426827	2.16622	2.87645
A0A8C0PDT0	Q92538	GBF1	SEC7 domain-containing protein	Golgi-specific brefeldin A-resistance guanine nucleotide exchange factor 1	0.594747	0.482849	1.79729	2.47197
A0A8C0N800	Q8TDP1	RNASEH2C	Uncharacterized protein	Ribonuclease H2 subunit C	1.01761	1.16239	1.51988	2.15351
A0A8C0Q178	P57678	GEMIN4	Gem nuclear organelle associated protein 4	Gem-associated protein 4	1.15053	0.998528	4.74169	4.35415
A0A8C0LSB4	Q3ZCQ8	TIMM50	Mitochondrial import inner membrane translocase subunit TIM50		0.930841	0.699307	3.99862	3.48239
A0A8C0PP81	O95721	SNAP29	Synaptosomal-associated protein 29		0.932763	0.629177	1.86137	1.3026
A0A8C0MP16	P53701	HCCS	Holocytochrome c-type synthase		0.465752	1.15121	3.95342	3.37372
A0A8C0SS63	P61962	DCAF7	DDB1 and CUL4 associated factor 7	DDB1- and CUL4-associated factor 7	2.65335	0.537478	2.78273	2.11948
A0A8C0PHR8	Q6VMQ6	ATF7IP	ATF7-interacting protein protein binding domain-containing protein	Activating transcription factor 7-interacting protein 1	1.30415	1.00164	2.70517	1.89385
A0A8C0LRG6	Q9UPN7	PPP6R1	Protein phosphatase 6 regulatory subunit 1	Serine/threonine-protein phosphatase 6 regulatory subunit 1	0.49817	0.454388	4.32571	3.44888
A0A8C0PAG3	Q92609	TBC1D5	Rab-GAP TBC domain-containing protein	TBC1 domain family member 5	1.63008	1.10973	5.15301	4.0473
A0A8C0MRX1	P46459	NSF	Vesicle-fusing ATPase		1.02122	0.638134	4.22727	3.07028

## Sheet: Supplementary Table 1E
Supplementary Table 1C. Orthologous proteins underrepresented by at least 30% (Log₂FC ≤ –0.514) in all four tumor cell lines compared to the 184B5 control line. CLF: Canis lupus familiaris. HSA: Homo sapiens.
UniProt CLF	UniProt HSA	Gene CLF	Gene HSA	Protein Name (CLF)	Protein Name (HSA)	MCF-7 Log2FC	MDA-MB-231 Log2FC	CMT-U27 Log2FC	IPC-366 Log2FC
A0A8C0LYY3	O76070	SNCG		Gamma-synuclein		-5.04082	-4.63446	-2.05382	-5.20224
A0A8C0MCJ9	P38646	HSPA9		Stress-70 protein, mitochondrial		-1.70867	-1.46046	-2.13717	-1.92071
A0A8C0MRF1	Q9UDY4	DNAJB4		DnaJ heat shock protein family (Hsp40) member B4	DnaJ homolog subfamily B member 4	-2.11759	-1.01222	-2.78639	-2.206
A0A8C0NPX9	P30101	PDIA3		Protein disulfide-isomerase	Protein disulfide-isomerase A3	-1.53635	-0.921403	-1.35495	-1.77788
A0A8C0NUL5	Q9H5Q4	TFB2M		rRNA adenine N(6)-methyltransferase	Dimethyladenosine transferase 2, mitochondrial	-3.74552	-0.906022	-3.14776	-2.69593
A0A8C0NZZ1	P07954	FH		Fumarate hydratase, mitochondrial		-5.01283	-4.45866	-4.34402	-2.57859
A0A8C0P803	P61812	TGFB2		Transforming growth factor beta	Transforming growth factor beta-2 proprotein	-4.68387	-1.72243	-3.59242	-1.81246
A0A8C0P9E2	Q14289	PTK2B		non-specific protein-tyrosine kinase	Protein-tyrosine kinase 2-beta	-1.56834	-2.32527	-2.64611	-5.43384
A0A8C0PHY3	Q14192	FHL2		Four and a half LIM domains protein 2		-2.57665	-2.80644	-3.76586	-3.37961
A0A8C0PPX6	P04062	GBA1		Glucosylceramidase	Lysosomal acid glucosylceramidase	-4.41285	-2.49339	-2.6506	-4.63106
A0A8C0SB92	Q8IV08	PLD3		5'-3' exonuclease PLD3		-3.06938	-2.27075	-3.43186	-2.63697
A0A8C0SLB3	P40306	PSMB10		Proteasome subunit beta	Proteasome subunit beta type-10	-1.82649	-1.20813	-4.0183	-4.74024
A0A8C0SM51	Q96CM8	CACNA1G	ACSF2	Medium-chain acyl-CoA ligase ACSF2, mitochondrial		-5.25939	-3.69355	-4.70736	-2.51952
A0A8C0SX57	Q96CS3	FAF2		Fas associated factor family member 2	FAS-associated factor 2	-1.49421	-0.57548	-2.91526	-2.41087
A0A8C0TKL9	O76003	GLRX3		Glutaredoxin-3		-1.45053	-0.524116	-3.86312	-3.40763
A0A8C0TR41	P19525	EIF2AK2		Eukaryotic translation initiation factor 2 alpha kinase 2	Interferon-induced, double-stranded RNA-activated protein kinase	-0.684058	-1.09546	-5.35732	-4.82789
A0A8I3S5F5	Q9C0C2	TNKS1BP1		Tankyrase 1 binding protein 1	182 kDa tankyrase-1-binding protein	-0.98112	-0.890127	-2.71909	-3.01548
A0A8C0NP49	Q92542	NCSTN		Nicastrin		-1.28631	-3.11968	-1.37176	-3.03268
A0A8C0NJG0	P52630	STAT2		Signal transducer and activator of transcription	Signal transducer and activator of transcription 2	-0.528031	-1.44858	-2.45387	-3.21907
A0A8C0NIU9	Q8IZW8	TNS4		Tensin-4		-0.936274	-0.627462	-1.51874	-3.37317
A0A8C0MBD9	O60568	PLOD3		procollagen-lysine 5-dioxygenase	Multifunctional procollagen lysine hydroxylase and glycosyltransferase LH3	-1.26	-0.74853	-0.881769	-1.64015
A0A8C0LWF8	P35580	MYH10		Myosin heavy chain 10	Myosin-10	-1.29992	-2.21132	-0.956204	-1.90714
